# Supplementary material for: Investigating phenotypic relationships in persimmon accessions through integrated proteomic and metabolomic analysis of corresponding fruits
Source: Front Plant Sci. 2023 Jan 30;14:1093074. doi: 10.3389/fpls.2023.1093074 (PMC9923171; doi:10.3389/fpls.2023.1093074)
Supplement: Supplementary file 2 [file Table_1.xlsx]

## Sheet: Kaki
	Tree		One-year-old shoot								Leaf blade					Sex expression of flowers	Female Flowers			Fruit																							Seeds			Time of flowering of female flower	Time of vegetative Time of vegetative bud burst	Time of ripeness for eating
Cultivars	1	2	3	4	5	6	7	8	9	10	11	12	13	14	15	16	17	18	19	20	21	22	23	24	25	26	27	28	29	30	31	32	33	34	35	36	37	38	39	40	41	42	43	44	45	46	47	48	49
Vaniglia	5	2	7	7	5	7	5	3	3	2	5	5	2	3	1	2	7	4	1	5	3	1	4	3	2	2	7	5	2	1	2	5	2	7	3	7	2		6		3	5	7	1	2	5	5	5
Kaki Tipo	5	1	7	5	7	5	5	3	2	2	7	5	1	3	1	1	7	5	2	7	3	1	3	3	1	1	7	1	2	1	1	7	3	7	5	5	1		5		3	3	5	3	2	5	5	5
Cioccolatino	5	2	3	5	3	3	5	3	3	1	7	7	1	3	1	3	3	2	1	7	8	1	2	2	1	1	7	1	2	1	1	7	3	7	3	5	2		5		3	5	7	3	2	5	3	3
Lampadina	5	4	5	5	5	5	5	5	2	4	3	3	1	1	2	2	5	3	1	3	2	1	2	2	1	1	1	1	1	1	1	7	3	7	5	5	1		6		2	5	3	2	5	5	5	5
[truncated: 1 more columns]
