# Supplementary material for: Investigating phenotypic relationships in persimmon accessions through integrated proteomic and metabolomic analysis of corresponding fruits
Source: Front Plant Sci. 2023 Jan 30;14:1093074. doi: 10.3389/fpls.2023.1093074 (PMC9923171; doi:10.3389/fpls.2023.1093074)
Supplement: Supplementary file 3 [file Table_2.xlsx]

## Sheet: Proteins
Checked	Protein FDR Confidence: Combined	Master	Accession	Description	Exp. q-value: Combined	Sum PEP Score	Coverage [%]	# Peptides	# PSMs	# Unique Peptides	# AAs	MW [kDa]	calc. pI	Score Mascot: Mascot	# Peptides (by Search Engine): Mascot	# Protein Pathway Groups	# Razor Peptides	Abundance Ratio: (Kaki tipo) / (cioccolatino)	Abundance Ratio: (lampadina) / (cioccolatino)	Abundance Ratio: (vaniglia) / (cioccolatino)	Abundance Ratio: (lampadina) / (Kaki tipo)	Abundance Ratio: (vaniglia) / (Kaki tipo)	Abundance Ratio: (vaniglia) / (lampadina)	Abundance Ratio Adj. P-Value: (Kaki tipo) / (cioccolatino)	Abundance Ratio Adj. P-Value: (lampadina) / (cioccolatino)	Abundance Ratio Adj. P-Value: (vaniglia) / (cioccolatino)	Abundance Ratio Adj. P-Value: (lampadina) / (Kaki tipo)	Abundance Ratio Adj. P-Value: (vaniglia) / (Kaki tipo)	Abundance Ratio Adj. P-Value: (vaniglia) / (lampadina)	Abundances (Grouped): cioccolatino	Abundances (Grouped): Kaki tipo	Abundances (Grouped): lampadina	Abundances (Grouped): vaniglia	Abundances (Grouped) CV [%]: cioccolatino	Abundances (Grouped) CV [%]: Kaki tipo	Abundances (Grouped) CV [%]: lampadina	Abundances (Grouped) CV [%]: vaniglia	Found in Sample: [S1] F1: 126, Sample, cioccolatino	Found in Sample: [S2] F2: 126, Sample, cioccolatino	Found in Sample: [S3] F3: 126, Sample, cioccolatino	Found in Sample: [S6] F1: 129, Sample, Kaki tipo	Found in Sample: [S9] F2: 129, Sample, Kaki tipo	Found in Sample: [S12] F3: 129, Sample, Kaki tipo	Found in Sample: [S5] F1: 128, Sample, lampadina	Found in Sample: [S8] F2: 128, Sample, lampadina	Found in Sample: [S11] F3: 128, Sample, lampadina	Found in Sample: [S4] F1: 127, Sample, vaniglia	Found in Sample: [S7] F2: 127, Sample, vaniglia	Found in Sample: [S10] F3: 127, Sample, vaniglia
FALSE	High	Master Protein	Dlo_alt0990F-001-01.1_g00020.1	Dlo_alt0990F-001-01.1_g00020.1	0	389.933	77	20	786	9	265	28.7	7.78	25788	20	0	21	1.828	1.169	1.982	0.639	1.084	1.696	1.60901e-05	0.0191845	2.21238e-06	1.56184e-05	0.579224	2.22057e-05	66.9	122.3	78.2	132.6	0.83	2.94	2.05	1.84	High	High	High	High	High	High	High	High	High	High	High	High
FALSE	High	Master Protein	Dlo_pri0360F.1_g00050.1	Dlo_pri0360F.1_g00050.1	0	302.156	60	10	400	6	230	24.6	4.91	16416	10	0	8	0.391	1.868	0.821	4.773	2.098	0.439	0.0213741	0.188027	1	0.000463786	0.066345	0.0278184	98	38.4	183.1	80.5	0.62	8.43	2.15	0.5	High	High	High	High	High	High	High	High	High	High	High	High
FALSE	High	Master Protein	Dlo_pri1050F-1.1_g00050.1	Dlo_pri1050F-1.1_g00050.1	0	144.298	37	8	344	1	268	29	7.99	12231	8	0	1	1.532	1.463	1.294	0.955	0.845	0.885	1	1	1	1	1	1	75.6	115.9	110.6	97.9	8.18	9.46	21.76	19.93	High	High	High	High	High	High	High	High	High	High	High	High
FALSE	High	Master Protein	Dlo_pri2008F.1_g00030.1	Dlo_pri2008F.1_g00030.1	0	113.822	38	8	278	3	265	28.8	8.43	8097	8	0	0	1.243	2.181	2.032	1.755	1.635	0.932	1	0.39913	0.284996	0.733298	1	1	62	77	135.1	125.9	8.48	5.01	0.7	0.56	High	High	High	High	High	High	High	High	High	High	High	High
FALSE	High	Master Protein	Dlo_pri0046F.1_g03060.1	Dlo_pri0046F.1_g03060.1	0	177.387	38	15	266	15	514	57.7	9.52	6949	15	0	0	1.521	1.3	1.818	0.855	1.195	1.398	0.235182	1	0.0795797	1	1	0.488197	70.9	107.9	92.2	128.9	0.51	0.71	1.2	1.13	High	High	High	High	High	High	High	High	High	High	High	High
FALSE	High	Master Protein	Dlo_pri0990F.1_g00080.1	Dlo_pri0990F.1_g00080.1	0	186.36	45	11	265	2	265	28.9	8.15	8814	11	0	1	2.263	3.258	3.741	1.44	1.653	1.148	1	0.822043	0.287382	1	1	1	39	88.2	127	145.8	25.65	5.06	7.24	4.78	High	High	High	High	High	High	High	High	High	High	High	High
FALSE	High	Master Protein	Dlo_pri0097F.1_g01500.1	Dlo_pri0097F.1_g01500.1	0	206.468	67	19	217	14	338	36.7	8.19	5740	19	0	6	0.868	0.971	0.931	1.118	1.072	0.959	1	1	1	1	1	1	106.1	92.1	103	98.8	0.9	1.44	1.46	1.11	High	High	High	High	High	High	High	High	High	High	High	High
FALSE	High	Master Protein	Dlo_pri0497F.1_g00170.1	Dlo_pri0497F.1_g00170.1	0	144.353	20	6	215	2	382	41.4	8.62	6652	6	0	0	0.761	1.313	1.071	1.725	1.407	0.816	1	1	1	1	1	1	96.5	73.4	126.7	103.3	1.01	4.37	5.27	3.16	High	High	High	High	High	High	High	High	High	High	High	High
FALSE	High	Master Protein	Dlo_pri0116F.1_g02840.1	Dlo_pri0116F.1_g02840.1	0	159.584	26	15	213	13	581	63.2	8.94	6949	15	0	3	0.626	0.995	0.824	1.588	1.315	0.828	0.851172	1	1	0.873622	1	1	116.1	72.7	115.5	95.7	1.68	1.17	1.27	0.78	High	High	High	High	High	High	High	High	High	High	High	High
FALSE	High	Master Protein	Dlo_pri0054F.1_g03340.1	Dlo_pri0054F.1_g03340.1	0	237.483	60	19	211	5	417	46.3	5.41	5978	19	0	21	0.89	0.941	0.964	1.057	1.083	1.024	1	1	1	1	1	1	105.4	93.8	99.2	101.6	0.92	1.85	0.26	0.82	High	High	High	High	High	High	High	High	High	High	High	High
FALSE	High	Master Protein	Dlo_pri0455F.1_g00510.1	Dlo_pri0455F.1_g00510.1	0	260.651	62	23	207	17	531	58.1	6.28	6033	23	0	9	0.943	0.977	0.914	1.035	0.969	0.936	1	1	1	1	1	1	104.3	98.4	101.9	95.4	0.26	1	0.66	0.37	High	High	High	High	High	High	High	High	High	High	High	High
FALSE	High	Master Protein	Dlo_alt0083F-010-01.1_g00010.1	Dlo_alt0083F-010-01.1_g00010.1	0	307.294	62	29	192	6	649	71.2	5.25	5413	29	0	30	0.719	0.927	0.811	1.289	1.127	0.874	1	1	1	1	1	1	115.7	83.2	107.3	93.8	2.06	1.72	1.13	0.68	High	High	High	High	High	High	High	High	High	High	High	High
FALSE	High	Master Protein	Dlo_pri0024F.1_g03890.1	Dlo_pri0024F.1_g03890.1	0	375.159	45	56	186	20	1710	194.4	5.41	4824	56	0	37	0.908	0.888	0.982	0.978	1.081	1.106	1	1	1	1	1	1	105.9	96.2	94	104	0.51	1.33	3.23	2.29	High	High	High	High	High	High	High	High	High	High	High	High
FALSE	High	Master Protein	Dlo_pri0050F.1_g01750.1	Dlo_pri0050F.1_g01750.1	0	278.418	53	19	183	7	561	61.3	6.2	5895	19	0	14	0.993	1.135	1.114	1.143	1.122	0.981	1	1	1	1	1	1	94.3	93.6	107	105	0.53	0.86	0.38	0.69	High	High	High	High	High	High	High	High	High	High	High	High
FALSE	High	Master Protein	Dlo_pri0030F.1_g04580.1	Dlo_pri0030F.1_g04580.1	0	267.387	49	25	181	4	649	71.1	5.21	4551	25	0	0	0.743	1.052	0.944	1.416	1.271	0.897	1	1	1	1	1	1	107	79.5	112.6	101	1.47	1.13	1	3.47	High	High	High	High	High	High	High	High	High	High	High	High
FALSE	High	Master Protein	Dlo_pri0182F.1_g01550.1	Dlo_pri0182F.1_g01550.1	0	190.755	55	25	180	24	497	54.1	8.82	4536	25	0	1	0.96	0.936	0.919	0.975	0.956	0.981	1	1	1	1	1	1	104.8	100.7	98.2	96.3	0.7	0.31	1.44	1.45	High	High	High	High	High	High	High	High	High	High	High	High
FALSE	High	Master Protein	Dlo_pri0318F.1_g00360.1	Dlo_pri0318F.1_g00360.1	0	247.245	48	25	172	2	648	70.9	5.25	4348	25	0	5	0.849	0.96	0.968	1.131	1.14	1.008	1	1	1	1	1	1	105.9	89.9	101.6	102.5	0.78	2.32	0.95	2.95	High	High	High	High	High	High	High	High	High	High	High	High
FALSE	High	Master Protein	Dlo_pri0129F.1_g01750.1	Dlo_pri0129F.1_g01750.1	0	158.315	56	14	171	11	358	38.2	8.32	4949	14	0	4	0.837	0.865	0.652	1.033	0.779	0.754	1	1	0.566253	1	1	1	119.3	99.9	103.1	77.8	0.39	1.02	0.64	0.23	High	High	High	High	High	High	High	High	High	High	High	High
FALSE	High	Master Protein	Dlo_pri0235F.1_g00450.1	Dlo_pri0235F.1_g00450.1	0	214.523	54	18	168	6	485	53.3	5.88	4797	18	0	0	1.09	1.1	1.05	1.009	0.963	0.954	1	1	1	1	1	1	94.3	102.8	103.8	99.1	1.79	2.44	2.27	1.86	High	High	High	High	High	High	High	High	High	High	High	High
FALSE	High	Master Protein	Dlo_pri0182F.1_g01250.1	Dlo_pri0182F.1_g01250.1	0	234.796	72	23	168	11	444	47.9	5.99	4800	23	0	15	0.958	1.026	0.918	1.071	0.959	0.895	1	1	1	1	1	1	102.5	98.2	105.2	94.1	1.51	2.14	2.74	1.83	High	High	High	High	High	High	High	High	High	High	High	High
FALSE	High	Master Protein	Dlo_pri0030F.1_g04420.1	Dlo_pri0030F.1_g04420.1	0	243.644	46	23	165	3	650	71.1	5.29	4163	23	0	0	0.623	0.956	0.707	1.534	1.135	0.74	1	1	1	1	1	1	121.7	75.8	116.3	86.1	1.12	3.11	2.67	1.07	High	High	High	High	High	High	High	High	High	High	High	High
FALSE	High	Master Protein	Dlo_pri0466F.1_g00490.1	Dlo_pri0466F.1_g00490.1	0	233.176	59	23	152	22	549	58.9	6.29	4843	23	0	1	1.024	0.926	0.857	0.904	0.837	0.926	1	1	0.385272	1	0.295928	1	105.1	107.6	97.3	90.1	1.08	0.78	1.27	0.2	High	High	High	High	High	High	High	High	High	High	High	High
FALSE	High	Master Protein	Dlo_pri0040F.1_g01640.1	Dlo_pri0040F.1_g01640.1	0	254.029	47	28	146	8	765	84.6	6.4	4463	28	0	23	0.978	0.825	0.976	0.843	0.998	1.183	1	1	1	1	1	1	105.9	103.5	87.3	103.3	0.97	0.35	1.1	0.29	High	High	High	High	High	High	High	High	High	High	High	High
FALSE	High	Master Protein	Dlo_pri0502F.1_g00800.1	Dlo_pri0502F.1_g00800.1	0	230.514	44	23	145	5	640	70.6	5.36	3880	23	0	3	0.719	0.867	0.95	1.205	1.32	1.095	1	1	1	1	1	1	113.1	81.4	98.1	107.4	3.23	2.66	3.3	1.46	High	High	High	High	High	High	High	High	High	High	High	High
FALSE	High	Master Protein	Dlo_pri0028F.1_g01250.1	Dlo_pri0028F.1_g01250.1	0	238.234	71	21	144	10	418	44.9	5.57	4491	21	0	2	0.969	0.884	0.992	0.911	1.023	1.123	1	1	1	1	1	1	104	100.8	91.9	103.2	0.8	2.65	2.11	0.17	High	High	High	High	High	High	High	High	High	High	High	High
FALSE	High	Master Protein	Dlo_pri0160F.1_g01640.1	Dlo_pri0160F.1_g01640.1	0	151.131	64	21	144	21	316	35.9	6.21	3839	21	0	0	1.123	1.034	0.886	0.92	0.789	0.857	0.816893	1	0.792912	1	0.0697011	0.281208	98.9	111.1	102.3	87.6	0.78	0.33	1.78	1.99	High	High	High	High	High	High	High	High	High	High	High	High
FALSE	High	Master Protein	Dlo_pri0068F.1_g00190.1	Dlo_pri0068F.1_g00190.1	0	182.122	45	26	133	10	699	80.1	5.1	3202	26	0	17	0.8	1.11	0.86	1.387	1.075	0.775	1	1	1	1	1	1	106.1	84.9	117.8	91.2	0.67	1.41	1.59	1.41	High	High	High	High	High	High	High	High	High	High	High	High
FALSE	High	Master Protein	Dlo_pri0110F.1_g02040.1	Dlo_pri0110F.1_g02040.1	0	162.289	59	23	131	18	485	53.5	6.81	3444	23	0	5	0.903	0.945	1.029	1.046	1.14	1.09	1	1	1	1	1	1	103.2	93.2	97.5	106.2	1.05	0.99	0.45	0.52	High	High	High	High	High	High	High	High	High	High	High	High
FALSE	High	Master Protein	Dlo_pri0144F.1_g02400.1	Dlo_pri0144F.1_g02400.1	0	148.688	50	11	129	11	313	33.9	5.9	3757	11	0	0	1.39	1.374	1.027	0.989	0.739	0.747	0.480247	1	1	1	0.816541	0.688728	83.5	116	114.7	85.8	1.6	0.77	0.98	0.44	High	High	High	High	High	High	High	High	High	High	High	High
FALSE	High	Master Protein	Dlo_pri0092F.1_g01130.1	Dlo_pri0092F.1_g01130.1	0	119.868	51	14	128	2	377	41.7	5.49	3107	14	0	2	0.98	0.929	1.029	0.949	1.051	1.108	1	1	1	1	1	1	101.6	99.5	94.4	104.5	3.24	4.37	4.74	2.09	High	High	High	High	High	High	High	High	High	High	High	High
FALSE	High	Master Protein	Dlo_pri0006F.1_g00790.1	Dlo_pri0006F.1_g00790.1	0	177.562	44	25	128	7	701	80.1	5.11	3066	25	0	5	0.833	0.99	0.904	1.189	1.085	0.913	1	1	1	1	1	1	107.3	89.4	106.3	97	3.8	3.27	0.58	1.37	High	High	High	High	High	High	High	High	High	High	High	High
FALSE	High	Master Protein	Dlo_pri0034F.1_g05360.1	Dlo_pri0034F.1_g05360.1	0	232.779	45	26	127	13	737	81.3	6.55	3628	26	0	0	0.982	1.057	0.978	1.076	0.996	0.925	1	1	1	0.82242	1	1	99.6	97.8	105.2	97.4	0.19	0.64	1.23	1.6	High	High	High	High	High	High	High	High	High	High	High	High
FALSE	High	Master Protein	Dlo_pri0132F.1_g01610.1	Dlo_pri0132F.1_g01610.1	0	121.195	45	16	126	3	447	49.3	9.06	2931	16	0	15	0.862	0.938	0.904	1.088	1.049	0.964	1	1	1	1	1	1	108	93.1	101.3	97.6	1.03	0.71	1.31	1.06	High	High	High	High	High	High	High	High	High	High	High	High
FALSE	High	Master Protein	Dlo_pri0235F.1_g00940.1	Dlo_pri0235F.1_g00940.1	0	115.343	47	15	125	1	401	44	9.06	2852	15	0	3	0.87	0.874	0.942	1.005	1.084	1.078	1	1	1	1	1	1	108.5	94.4	94.9	102.3	1.01	2.1	1.79	0.81	High	High	High	High	High	High	High	High	High	High	High	High
FALSE	High	Master Protein	Dlo_pri0006F.1_g03250.1	Dlo_pri0006F.1_g03250.1	0	218.643	50	21	124	19	487	52.2	6.02	4167	21	0	3	0.808	0.936	0.818	1.158	1.012	0.873	1	1	1	1	1	1	112.3	90.8	105.1	91.8	0.41	0.33	0.47	0.27	High	High	High	High	High	High	High	High	High	High	High	High
FALSE	High	Master Protein	Dlo_pri0006F.1_g02500.1	Dlo_pri0006F.1_g02500.1	0	222	42	27	123	6	843	93.9	6.2	3537	27	0	26	0.908	1.051	0.941	1.158	1.037	0.895	1	1	1	1	1	1	102.5	93.1	107.8	96.5	0.45	0.6	0.63	0.85	High	High	High	High	High	High	High	High	High	High	High	High
FALSE	High	Master Protein	Dlo_pri0196F.1_g00650.1	Dlo_pri0196F.1_g00650.1	0	201.088	45	29	118	29	689	78.9	4.74	2951	29	0	0	0.792	1.096	1.074	1.385	1.357	0.98	0.910786	1	1	0.33843	0.660936	1	101	79.9	110.7	108.5	1.44	0.51	0.82	0.73	High	High	High	High	High	High	High	High	High	High	High	High
FALSE	High	Master Protein	Dlo_pri0020F.1_g07560.1	Dlo_pri0020F.1_g07560.1	0	212.962	38	24	114	3	883	98.5	6.52	3377	24	0	0	1.101	0.916	0.962	0.832	0.874	1.05	1	1	1	1	1	1	100.5	110.7	92.1	96.7	1.91	3.62	6.76	0.44	High	High	High	High	High	High	High	High	High	High	High	High
FALSE	High	Master Protein	Dlo_pri0455F.1_g00480.1	Dlo_pri0455F.1_g00480.1	0	160.677	50	21	111	17	414	46.6	7.4	3221	21	0	4	0.928	1.082	0.9	1.165	0.969	0.832	1	1	1	1	1	1	102.3	95	110.7	92.1	1.61	4.82	3.68	1.83	High	High	High	High	High	High	High	High	High	High	High	High
FALSE	High	Master Protein	Dlo_pri0469F.1_g00680.1	Dlo_pri0469F.1_g00680.1	0	138.756	49	10	111	10	294	31.6	9.22	3015	10	0	0	0.629	1.165	0.353	1.851	0.561	0.303	1	1	0.525746	1	1	0.267826	127.1	80	148	44.9	2.16	1.12	1.65	6.52	High	High	High	High	High	High	High	High	High	High	High	High
FALSE	High	Master Protein	Dlo_pri0099F.1_g00750.1	Dlo_pri0099F.1_g00750.1	0	105.454	32	10	109	10	365	39.4	8.48	2998	10	0	0	1.413	1.094	1.498	0.775	1.06	1.369	0.231103	1	0.188601	0.54484	1	0.29676	79.9	112.9	87.5	119.7	1.2	1.39	0.84	0.95	High	High	High	High	High	High	High	High	High	High	High	High
FALSE	High	Master Protein	Dlo_pri0030F.1_g02910.1	Dlo_pri0030F.1_g02910.1	0	113.78	19	14	109	2	1010	111.4	8.06	2473	14	0	0	0.975	0.976	0.958	1.001	0.982	0.981	1	1	1	1	1	1	102.3	99.8	99.9	98	0.06	0.2	2.52	2.31	High	High	High	High	High	High	High	High	High	High	High	High
FALSE	High	Master Protein	Dlo_pri0211F.1_g00860.1	Dlo_pri0211F.1_g00860.1	0	174.485	50	22	109	22	583	63.7	6.33	2729	22	0	0	0.868	1.017	0.886	1.172	1.021	0.872	1	1	1	1	1	1	106.1	92.1	107.9	94	1.09	0.22	0.46	0.81	High	High	High	High	High	High	High	High	High	High	High	High
FALSE	High	Master Protein	Dlo_pri0019F.1_g05210.1	Dlo_pri0019F.1_g05210.1	0	235.27	28	35	109	2	1584	180.5	5.4	2968	35	0	0	1.043	0.977	0.995	0.937	0.954	1.018	1	1	1	1	1	1	99.6	103.9	97.4	99.1	3.76	5.58	7.22	5.35	High	High	High	High	High	High	High	High	High	High	High	High
FALSE	High	Master Protein	Dlo_pri1597F.1_g00130.1	Dlo_pri1597F.1_g00130.1	0	123.417	56	19	102	19	425	47.2	5.33	2500	19	0	0	0.792	1.105	0.778	1.395	0.982	0.704	1	1	1	0.691608	1	0.614342	108.9	86.2	120.2	84.7	1.06	1.11	1.67	2.63	High	High	High	High	High	High	High	High	High	High	High	High
FALSE	High	Master Protein	Dlo_pri0002F.1_g07010.1	Dlo_pri0002F.1_g07010.1	0	208.105	51	21	100	19	592	65.2	6.73	3193	21	0	2	1.756	0.993	1.263	0.566	0.719	1.272	0.231103	1	1	0.182994	1	1	79.8	140.1	79.2	100.8	1.33	1.92	1.41	0.93	High	High	High	High	High	High	High	High	High	High	High	High
FALSE	High	Master Protein	Dlo_pri0015F.1_g04470.1	Dlo_pri0015F.1_g04470.1	0	173.981	35	25	100	20	811	92.3	6.35	2626	25	0	6	2.042	0.839	1.357	0.411	0.664	1.616	3.73663e-05	0.313709	0.00986516	1.0324e-05	0.00234403	0.000680428	76.4	155.9	64.1	103.6	1.27	1.52	2.31	0.96	High	High	High	High	High	High	High	High	High	High	High	High
FALSE	High	Master Protein	Dlo_pri0000F.1_g05430.1	Dlo_pri0000F.1_g05430.1	0	84.47	65	14	98	6	262	29.5	4.81	2421	14	0	9	1.081	1.044	0.93	0.966	0.861	0.891	1	1	1	1	0.808176	1	98.7	106.6	103	91.7	0.61	1.32	1.19	1.26	High	High	High	High	High	High	High	High	High	High	High	High
FALSE	High	Master Protein	Dlo_pri0388F.1_g00810.1	Dlo_pri0388F.1_g00810.1	0	105.784	34	13	98	7	382	41.3	9.7	2421	13	0	6	0.993	0.937	0.939	0.943	0.946	1.003	1	1	1	1	1	1	103.4	102.7	96.9	97.1	2.33	4.24	2.06	1.24	High	High	High	High	High	High	High	High	High	High	High	High
FALSE	High	Master Protein	Dlo_pri0809F.1_g00300.1	Dlo_pri0809F.1_g00300.1	0	169.026	68	14	97	2	294	32.8	5.68	2976	14	0	0	0.877	1.036	1.284	1.181	1.464	1.239	1	1	1	1	1	1	95.3	83.6	98.7	122.4	12.49	16.8	14.98	13.88	High	High	High	High	High	High	High	High	High	High	High	High
FALSE	High	Master Protein	Dlo_pri0018F.1_g00560.1	Dlo_pri0018F.1_g00560.1	0	157.493	31	17	95	5	646	70.9	5.29	2585	17	0	0	0.907	0.866	1.045	0.956	1.153	1.207	0.400286	0.247374	1	1	0.139024	0.0408591	104.8	95	90.7	109.5	1.26	2.27	1.14	1.65	High	High	High	High	High	High	High	High	High	High	High	High
FALSE	High	Master Protein	Dlo_pri0037F.1_g01930.1	Dlo_pri0037F.1_g01930.1	0	48.543	22	4	93	2	223	24	8.06	2431	4	0	0	1.316	1.752	2.612	1.331	1.984	1.49	1	0.523111	0.0299979	1	0.108903	0.673736	59.9	78.8	104.9	156.4	3.28	4.76	1.59	3.13	High	High	High	High	High	High	High	High	High	High	High	High
FALSE	High	Master Protein	Dlo_alt0120F-017-01.1_g00010.1	Dlo_alt0120F-017-01.1_g00010.1	0	172.881	42	30	93	30	925	102.7	5.1	2378	30	0	0	0.717	0.924	0.938	1.289	1.309	1.015	1	1	1	1	1	1	111.8	80.1	103.3	104.8	0.63	1.39	0.42	0.67	High	High	High	High	High	High	High	High	High	High	High	High
FALSE	High	Master Protein	Dlo_pri0102F.1_g02980.1	Dlo_pri0102F.1_g02980.1	0	117.353	39	14	92	2	449	49.5	5.14	2223	14	0	0	1.374	1.092	1.193	0.795	0.869	1.092	1	1	1	1	1	1	85.9	117.9	93.8	102.4	9.97	5.53	4.47	4.98	High	High	High	High	High	High	High	High	High	High	High	High
FALSE	High	Master Protein	Dlo_pri0235F.1_g00440.1	Dlo_pri0235F.1_g00440.1	0	149.176	42	16	90	16	471	51.9	7.08	2639	16	0	0	0.836	1.077	0.981	1.289	1.174	0.91	1	1	1	1	1	1	102.7	85.8	110.7	100.8	0.38	1.68	0.52	1.09	High	High	High	High	High	High	High	High	High	High	High	High
FALSE	High	Master Protein	Dlo_pri0932F.1_g00450.1	Dlo_pri0932F.1_g00450.1	0	133.84	36	20	89	3	722	79.7	5.62	2445	20	0	18	1.191	1.013	1.128	0.851	0.947	1.114	1	1	1	1	1	1	92.3	110	93.5	104.2	1.18	0.95	1.57	1.38	High	High	High	High	High	High	High	High	High	High	High	High
FALSE	High	Master Protein	Dlo_pri0024F.1_g00410.1	Dlo_pri0024F.1_g00410.1	0	174.727	48	25	89	25	606	64.2	5.74	2226	25	0	0	0.898	1.048	0.92	1.167	1.024	0.878	1	1	1	1	1	1	103.5	92.9	108.4	95.2	0.65	0.68	0.61	0.14	High	High	High	High	High	High	High	High	High	High	High	High
FALSE	High	Master Protein	Dlo_pri0370F.1_g01060.1	Dlo_pri0370F.1_g01060.1	0	145.287	39	14	89	10	460	50.1	8.02	2719	14	0	5	1.672	0.833	1.928	0.498	1.153	2.316	0.0479505	1	0.018201	0.00638909	1	0.00408075	73.6	123.1	61.3	142	2.9	2.29	0.64	0.33	High	High	High	High	High	High	High	High	High	High	High	High
FALSE	High	Master Protein	Dlo_pri0018F.1_g01260.1	Dlo_pri0018F.1_g01260.1	0	189.34	51	19	88	15	597	62.4	7.05	3222	19	0	4	0.895	0.883	0.859	0.987	0.96	0.973	1	1	1	1	1	1	110	98.4	97.1	94.5	0.62	1.21	3.29	1.7	High	High	High	High	High	High	High	High	High	High	High	High
FALSE	High	Master Protein	Dlo_pri0121F.1_g01200.1	Dlo_pri0121F.1_g01200.1	0	137.421	48	17	88	1	447	50.2	4.86	2477	17	0	19	1.23	0.887	0.981	0.721	0.797	1.106	1	1	1	1	1	1	97.6	120.1	86.6	95.8	0.77	0.62	2.25	0.84	Not Found	Not Found	High	Not Found	Not Found	High	Not Found	Not Found	High	Not Found	Not Found	High
FALSE	High	Master Protein	Dlo_pri0124F.1_g00270.1	Dlo_pri0124F.1_g00270.1	0	177.79	43	23	88	20	665	73.2	5.27	2624	23	0	0	1.054	1.073	1.066	1.019	1.011	0.993	1	1	1	1	1	1	95.4	100.5	102.4	101.7	0.84	0.32	2.23	1.79	High	High	High	High	High	High	High	High	High	High	High	High
FALSE	High	Master Protein	Dlo_alt0164F-001-01.1_g00050.1	Dlo_alt0164F-001-01.1_g00050.1	0	138.763	44	21	87	6	589	63.1	6	2031	21	0	19	0.77	0.935	0.718	1.214	0.933	0.769	1	1	1	1	1	1	116.8	90	109.2	83.9	1.74	0.84	1.29	0.51	High	High	High	High	High	High	High	High	High	High	High	High
FALSE	High	Master Protein	Dlo_pri0059F.1_g02600.1	Dlo_pri0059F.1_g02600.1	0	139.243	26	20	87	20	977	108.9	6.6	2425	20	0	0	1.255	0.985	1.236	0.785	0.984	1.254	1	1	1	1	1	1	89.4	112.2	88.1	110.4	2.33	2.84	4.25	2.27	High	High	High	High	High	High	High	High	High	High	High	High
FALSE	High	Master Protein	Dlo_pri0134F.1_g01000.1	Dlo_pri0134F.1_g01000.1	0	175.005	36	26	87	26	912	101.4	6.19	2629	26	0	0	0.736	1.02	0.685	1.386	0.932	0.672	1	1	0.813742	0.914041	1	0.58326	116.2	85.5	118.6	79.7	0.98	1.17	0.65	1.39	High	High	High	High	High	High	High	High	High	High	High	High
FALSE	High	Master Protein	Dlo_pri0129F.1_g01460.1	Dlo_pri0129F.1_g01460.1	0	114.85	39	11	83	1	410	44.2	5.29	2614	11	0	0	0.686	1.053	1.07	1.535	1.559	1.016							105	72.1	110.6	112.3					High	High	Not Found	High	High	Not Found	High	High	Not Found	High	High	Not Found
FALSE	High	Master Protein	Dlo_pri0283F.1_g00820.1	Dlo_pri0283F.1_g00820.1	0	123.808	38	16	82	1	518	57.5	4.98	2306	16	0	0	1.444	0.744	1.051	0.515	0.727	1.413	1	1	1	1	1	1	94.4	136.3	70.2	99.1	0.41	0.02	1.65	0.75	High	Not Found	High	High	Not Found	High	High	Not Found	High	High	Not Found	High
FALSE	High	Master Protein	Dlo_pri0131F.1_g01260.1	Dlo_pri0131F.1_g01260.1	0	132.068	50	17	81	6	446	50.1	4.89	2500	17	0	1	1.216	0.889	0.858	0.731	0.706	0.966	1	1	1	1	1	1	100.9	122.8	89.7	86.6	1.54	9.15	5.7	7.8	High	High	High	High	High	High	High	High	High	High	High	High
FALSE	High	Master Protein	Dlo_pri0146F.1_g01840.1	Dlo_pri0146F.1_g01840.1	0	100.511	27	10	81	4	470	51.5	6.18	2014	10	0	0	1.014	1.04	1.032	1.026	1.018	0.992	1	1	1	1	1	1	97.9	99.3	101.8	101	8.6	12.04	5.12	3.15	High	High	High	High	High	High	High	High	High	High	High	High
FALSE	High	Master Protein	Dlo_pri0015F.1_g01420.1	Dlo_pri0015F.1_g01420.1	0	98.975	38	11	81	11	368	40.3	6.54	2291	11	0	0	1.147	1.638	1.596	1.428	1.391	0.974	1	0.00937533	0.00986516	0.0211461	0.0639106	1	74.3	85.3	121.8	118.6	2.88	0.49	2.42	3.08	High	High	High	High	High	High	High	High	High	High	High	High
FALSE	High	Master Protein	Dlo_pri0001F.1_g07880.1	Dlo_pri0001F.1_g07880.1	0	139.716	42	15	80	10	500	55.9	7.9	2170	15	0	8	1.089	0.915	0.991	0.84	0.91	1.083	1	1	1	1	1	1	100.1	109.1	91.6	99.2	3.63	1.07	1.96	1.46	High	High	High	High	High	High	High	High	High	High	High	High
FALSE	High	Master Protein	Dlo_pri0001F.1_g04080.1	Dlo_pri0001F.1_g04080.1	0	68.371	41	11	78	3	336	37.6	5.52	1796	11	0	0	1.061	1.003	1.009	0.945	0.951	1.006	1	1	1	1	1	1	98.2	104.2	98.5	99.1	6.58	1.61	1.85	6.43	High	High	High	High	High	High	High	High	High	High	High	High
FALSE	High	Master Protein	Dlo_pri0002F.1_g01920.1	Dlo_pri0002F.1_g01920.1	0	109.122	45	9	77	9	205	22.5	4.81	2092	9	0	0	2.006	1.087	1.296	0.542	0.646	1.192	0.000107154	1	0.0575028	0.000133799	0.0027015	0.165952	74.2	148.9	80.7	96.2	1.81	1.09	0.58	0.39	High	High	High	High	High	High	High	High	High	High	High	High
FALSE	High	Master Protein	Dlo_pri0004F.1_g08770.1	Dlo_pri0004F.1_g08770.1	0	144.481	45	21	77	21	581	64.1	4.77	1927	21	0	0	1.323	1.1	1.233	0.831	0.932	1.121	1	1	1	1	1	1	85.9	113.7	94.5	105.9	2.38	3.77	3.69	1.49	High	High	High	High	High	High	High	High	High	High	High	High
FALSE	High	Master Protein	Dlo_pri0255F.1_g01490.1	Dlo_pri0255F.1_g01490.1	0	160.13	55	19	77	19	477	53.3	5.43	2585	19	0	0	1.155	1.007	1.077	0.872	0.933	1.069	1	1	1	1	1	1	94.3	108.9	95.1	101.7	1.11	1.29	0.87	0.64	High	High	High	High	High	High	High	High	High	High	High	High
FALSE	High	Master Protein	Dlo_pri0373F.1_g00350.1	Dlo_pri0373F.1_g00350.1	0	137.215	41	19	76	4	575	61.3	5.87	1854	19	0	2	0.839	0.956	0.735	1.139	0.876	0.769	1	1	1	1	1	1	113.3	95.1	108.3	83.3	2.92	2.26	3.32	4.88	High	High	High	High	High	High	High	High	High	High	High	High
FALSE	High	Master Protein	Dlo_pri0045F.1_g00320.1	Dlo_pri0045F.1_g00320.1	0	79.852	47	13	76	8	341	37.2	8.32	1573	13	0	2	0.738	1.482	0.686	2.008	0.93	0.463	1	1	1	0.429005	1	0.267677	102.4	75.6	151.7	70.3	2.19	4.03	6.44	6.78	High	High	High	High	High	High	High	High	High	High	High	High
FALSE	High	Master Protein	Dlo_pri0060F.1_g03660.1	Dlo_pri0060F.1_g03660.1	0	86.291	52	13	76	5	264	29.7	4.79	1738	13	0	1	1.131	1.186	1.158	1.049	1.024	0.976	1	1	1	1	1	1	89.4	101.1	106	103.5	1.94	2.93	10.06	7.46	High	High	High	High	High	High	High	High	High	High	High	High
FALSE	High	Master Protein	Dlo_pri0001F.1_g12430.1	Dlo_pri0001F.1_g12430.1	0	65.841	23	8	75	3	337	36.5	6.81	1634	8	0	0	0.556	1.259	0.672	2.262	1.207	0.533	1	1	1	1	1	1	114.7	63.8	144.4	77	1.71	1.86	8.35	16.06	High	High	High	High	High	High	High	High	High	High	High	High
FALSE	High	Master Protein	Dlo_pri0041F.1_g00210.1	Dlo_pri0041F.1_g00210.1	0	118.294	41	18	75	15	611	67.2	7.25	1672	18	0	4	0.933	1.197	0.885	1.283	0.948	0.739	1	1	1	1	1	1	99.6	92.9	119.3	88.1	1.1	1.84	0.76	0.84	High	High	High	High	High	High	High	High	High	High	High	High
FALSE	High	Master Protein	Dlo_pri0179F.1_g02220.1	Dlo_pri0179F.1_g02220.1	0	149.673	33	14	75	14	791	84.9	5.14	2302	14	0	0	1.486	1.263	1.352	0.85	0.91	1.071	0.850635	1	1	1	1	1	78.4	116.5	99	106	2.08	5.32	4.76	2.06	High	High	High	High	High	High	High	High	High	High	High	High
FALSE	High	Master Protein	Dlo_pri0092F.1_g02390.1	Dlo_pri0092F.1_g02390.1	0	111.794	37	14	74	5	486	53.7	5.26	1778	14	0	9	1.323	1	1.151	0.756	0.87	1.15	1	1	1	1	1	1	89.4	118.3	89.4	102.9	2.71	1.34	1.32	0.46	High	High	High	High	High	High	High	High	High	High	High	High
FALSE	High	Master Protein	Dlo_pri0035F.1_g03540.1	Dlo_pri0035F.1_g03540.1	0	147.879	52	24	74	20	618	67.7	5.73	1850	24	0	4	1.15	0.946	0.971	0.822	0.844	1.026	1	1	1	1	1	1	98.4	113.1	93	95.5	0.7	0.48	1.29	0.66	High	High	High	High	High	High	High	High	High	High	High	High
FALSE	High	Master Protein	Dlo_pri0084F.1_g01690.1	Dlo_pri0084F.1_g01690.1	0	79.73	31	11	74	8	421	47.8	6.73	1935	11	0	3	0.98	1.031	0.973	1.052	0.992	0.943	1	1	1	1	1	1	100.4	98.4	103.5	97.6	1.96	1.22	1.47	2.42	High	High	High	High	High	High	High	High	High	High	High	High
FALSE	High	Master Protein	Dlo_pri0385F.1_g00740.1	Dlo_pri0385F.1_g00740.1	0	168.411	31	30	74	13	1216	136.4	7.05	1876	30	0	19	0.821	0.922	0.949	1.123	1.156	1.029	1	1	1	1	1	1	108.4	89	99.9	102.8	2.32	2.56	1.06	0.66	High	High	High	High	High	High	High	High	High	High	High	High
FALSE	High	Master Protein	Dlo_pri0123F.1_g02050.1	Dlo_pri0123F.1_g02050.1	0	140.229	41	15	73	15	494	54.9	5.01	2173	15	0	0	1.014	1.162	0.939	1.146	0.925	0.808	1	1	1	1	1	1	97.2	98.6	113	91.2	1.04	1.6	1.78	0.64	High	High	High	High	High	High	High	High	High	High	High	High
FALSE	High	Master Protein	Dlo_pri0088F.1_g00510.1	Dlo_pri0088F.1_g00510.1	0	134.675	38	15	72	15	510	55	7.14	1969	15	0	0	1.117	1.046	1.035	0.936	0.926	0.989	1	1	1	1	1	1	95.3	106.5	99.7	98.6	1.75	2.67	1.79	1.98	High	High	High	High	High	High	High	High	High	High	High	High
FALSE	High	Master Protein	Dlo_pri0282F.1_g00550.1	Dlo_pri0282F.1_g00550.1	0	121.465	29	12	72	12	498	56.3	8.79	2351	12	0	0	1.652	1.373	2.081	0.831	1.26	1.516	0.851172	1	0.312165	1	1	1	65.5	108.2	89.9	136.4	1.59	1.4	3.67	4.12	High	High	High	High	High	High	High	High	High	High	High	High
FALSE	High	Master Protein	Dlo_pri0138F.1_g00760.1	Dlo_pri0138F.1_g00760.1	0	134.86	46	17	72	9	599	63.1	6.34	2116	17	0	8	1.118	0.932	1.081	0.833	0.966	1.159	1	1	1	1	1	1	96.8	108.3	90.3	104.6	2.23	3.56	1.12	1.66	High	High	High	High	High	High	High	High	High	High	High	High
FALSE	High	Master Protein	Dlo_pri0361F.1_g00140.1	Dlo_pri0361F.1_g00140.1	0	115.081	25	22	71	10	1008	115.1	7.61	1718	22	0	12	0.959	0.996	0.92	1.039	0.959	0.923	1	1	1	1	1	1	103.2	99	102.8	94.9	0.99	0.48	1.73	0.75	High	High	High	High	High	High	High	High	High	High	High	High
FALSE	High	Master Protein	Dlo_pri0061F.1_g03850.1	Dlo_pri0061F.1_g03850.1	0	118.602	48	13	71	12	365	41.7	7.84	1881	13	0	1	1.081	1.163	0.71	1.076	0.657	0.611	1	1	0.158576	1	0.066345	0.0195919	101.2	109.4	117.6	71.8	0.79	1.58	1.59	3.22	High	High	High	High	High	High	High	High	High	High	High	High
FALSE	High	Master Protein	Dlo_pri0423F.1_g00130.1	Dlo_pri0423F.1_g00130.1	0	102.548	18	14	70	2	913	96.8	7.8	1811	14	0	0	1.705	1.436	1.37	0.842	0.803	0.954	1	1	1	1	1	1	72.6	123.8	104.2	99.4	5.47	1.16	1.75	2.87	High	High	High	High	High	High	High	High	High	High	High	High
FALSE	High	Master Protein	Dlo_pri0006F.1_g04810.1	Dlo_pri0006F.1_g04810.1	0	114.588	40	14	70	14	508	53.7	7.21	1965	14	0	0	1.154	0.923	1.007	0.8	0.873	1.091	1	1	1	0.234665	1	1	98	113	90.4	98.6	2.43	3.22	0.61	5.56	High	High	High	High	High	High	High	High	High	High	High	High
FALSE	High	Master Protein	Dlo_pri0006F.1_g05590.1	Dlo_pri0006F.1_g05590.1	0	128.755	36	19	70	19	636	69	7.46	2085	19	0	0	0.896	0.971	0.967	1.083	1.079	0.996	1	1	1	1	1	1	104.3	93.5	101.3	100.9	0.05	1.49	0.41	1.01	High	High	High	High	High	High	High	High	High	High	High	High
FALSE	High	Master Protein	Dlo_pri0112F.1_g01220.1	Dlo_pri0112F.1_g01220.1	0	112.685	39	14	70	2	449	50.4	4.87	2030	14	0	0	1.264	0.894	1.096	0.707	0.868	1.227	1	1	1	1	1	1	94	118.8	84	103.1	13.16	18.41	4.35	11.27	High	High	High	High	High	High	High	High	High	High	High	High
FALSE	High	Master Protein	Dlo_pri0305F.1_g00350.1	Dlo_pri0305F.1_g00350.1	0	97.069	45	13	70	13	366	40.6	6.04	1747	13	0	0	1.184	1.145	1.037	0.967	0.875	0.905	1	1	1	1	1	1	91.6	108.5	104.9	95	1.05	0.23	1.47	0.54	High	High	High	High	High	High	High	High	High	High	High	High
FALSE	High	Master Protein	Dlo_pri0382F.1_g00310.1	Dlo_pri0382F.1_g00310.1	0	91.836	22	12	70	3	570	62.5	9.64	2006	12	0	5	0.757	1.065	1.023	1.406	1.351	0.96	1	1	1	1	1	1	104	78.8	110.8	106.4	2.28	2.97	0.63	0.76	High	High	High	High	High	High	High	High	High	High	High	High
FALSE	High	Master Protein	Dlo_pri0030F.1_g01640.1	Dlo_pri0030F.1_g01640.1	0	120.484	32	16	69	16	590	62.2	5.49	1605	16	0	0	0.836	1.003	0.909	1.2	1.088	0.907	1	1	1	1	1	1	106.7	89.2	107	97.1	0.39	0.97	0.39	1.1	High	High	High	High	High	High	High	High	High	High	High	High
FALSE	High	Master Protein	Dlo_pri0031F.1_g02540.1	Dlo_pri0031F.1_g02540.1	0	79.511	54	12	69	5	263	29.5	4.78	1637	12	0	0	1.467	1.362	1.044	0.928	0.712	0.767	1	1	1	1	1	1	82.1	120.4	111.8	85.7	2.06	0.87	2.96	1.48	High	High	High	High	High	High	High	High	High	High	High	High
FALSE	High	Master Protein	Dlo_pri0370F.1_g01080.1	Dlo_pri0370F.1_g01080.1	0	96.521	45	7	68	4	217	23.5	8.66	2631	7	0	0	1.795	0.757	1.967	0.422	1.096	2.598	0.150834	1	0.113721	0.0184547	1	0.0154505	72.5	130.1	54.9	142.6	0.36	0.24	1.61	0.74	High	High	High	High	High	High	High	High	High	High	High	High
FALSE	High	Master Protein	Dlo_pri0048F.1_g04220.1	Dlo_pri0048F.1_g04220.1	0	112.851	34	17	68	14	657	74.6	6.14	1800	17	0	0	0.851	0.956	0.847	1.123	0.996	0.886	1	1	1	1	1	1	109.5	93.1	104.6	92.7	1.63	1.18	0.83	0.84	High	High	High	High	High	High	High	High	High	High	High	High
FALSE	High	Master Protein	Dlo_pri0159F.1_g00310.1	Dlo_pri0159F.1_g00310.1	0	148.054	25	27	68	27	1380	149	6.46	1817	27	0	0	0.967	0.981	1.025	1.014	1.059	1.045	1	1	1	1	1	1	100.7	97.4	98.7	103.2	2	2.34	1.61	0.73	High	High	High	High	High	High	High	High	High	High	High	High
FALSE	High	Master Protein	Dlo_pri0065F.1_g01290.1	Dlo_pri0065F.1_g01290.1	0	103.421	25	15	68	1	819	86.3	6.57	1768	15	0	14	1.155	1.179	1.047	1.021	0.906	0.888	0.816893	1	1	1	1	1	91.3	105.5	107.7	95.6	1.11	1.13	0.3	2.13	Not Found	Not Found	Not Found	Not Found	High	Not Found	Not Found	Not Found	Not Found	Not Found	High	Not Found
FALSE	High	Master Protein	Dlo_pri0016F.1_g04730.1	Dlo_pri0016F.1_g04730.1	0	150.685	27	26	68	9	1218	137	7.03	1729	26	0	0	0.815	0.951	0.871	1.167	1.069	0.916	1	1	1	1	1	1	110	89.6	104.6	95.8	1.32	4.89	3.96	1.81	High	High	High	High	High	High	High	High	High	High	High	High
FALSE	High	Master Protein	Dlo_pri0030F.1_g01580.1	Dlo_pri0030F.1_g01580.1	0	154.293	44	21	67	4	623	68.7	4.96	1895	21	0	0	0.916	1.31	0.996	1.431	1.088	0.76	1	1	1	1	1	1	94.7	86.7	124.1	94.4	2.46	4.67	5.01	1.9	High	High	High	High	High	High	High	High	High	High	High	High
FALSE	High	Master Protein	Dlo_pri0032F.1_g05690.1	Dlo_pri0032F.1_g05690.1	0	134.113	26	20	67	18	987	107.3	7.09	1987	20	0	2	0.885	0.927	0.869	1.047	0.982	0.938	1	1	1	1	1	1	108.7	96.2	100.7	94.5	2.01	2.94	0.26	0.73	High	High	High	High	High	High	High	High	High	High	High	High
FALSE	High	Master Protein	Dlo_pri0002F.1_g06470.1	Dlo_pri0002F.1_g06470.1	0	141.088	50	19	67	19	506	54.7	6.96	2012	19	0	0	0.979	0.928	0.89	0.948	0.908	0.959	1	1	1	1	1	1	105.4	103.2	97.8	93.7	0.61	1.6	2.1	2.17	High	High	High	High	High	High	High	High	High	High	High	High
FALSE	High	Master Protein	Dlo_pri0030F.1_g04910.1	Dlo_pri0030F.1_g04910.1	0	81.423	51	10	66	10	253	27.3	5.71	2006	10	0	0	1.061	0.949	0.97	0.895	0.914	1.022	1	1	1	1	1	1	100.5	106.6	95.4	97.5	1.96	1.52	1.28	2.05	High	High	High	High	High	High	High	High	High	High	High	High
FALSE	High	Master Protein	Dlo_pri0018F.1_g05310.1	Dlo_pri0018F.1_g05310.1	0	98.062	21	14	66	1	763	80.1	5.27	1734	14	0	0	0.963	1.024	0.977	1.064	1.015	0.953							100.9	97.2	103.4	98.6					Not Found	High	Not Found	Not Found	High	Not Found	Not Found	High	Not Found	Not Found	High	Not Found
FALSE	High	Master Protein	Dlo_pri0053F.1_g00950.1	Dlo_pri0053F.1_g00950.1	0	84.162	44	12	65	12	332	35.4	6.79	1718	12	0	0	0.909	0.985	0.867	1.084	0.954	0.88	1	1	1	1	1	1	106.4	96.6	104.8	92.2	1.29	2.17	1.35	2.04	High	High	High	High	High	High	High	High	High	High	High	High
FALSE	High	Master Protein	Dlo_alt0129F-008-01.1_g00100.1	Dlo_alt0129F-008-01.1_g00100.1	0	116.671	36	18	65	18	642	71.5	7.37	1794	18	0	0	0.929	1.051	0.905	1.131	0.974	0.861	1	1	1	1	1	1	102.9	95.6	108.2	93.2	2.49	2.55	0.77	0.75	High	High	High	High	High	High	High	High	High	High	High	High
FALSE	High	Master Protein	Dlo_pri0042F.1_g04320.1	Dlo_pri0042F.1_g04320.1	0	67.759	61	13	65	6	262	29.5	4.81	1357	13	0	1	0.926	1.092	0.833	1.179	0.899	0.763	1	1	1	1	1	1	103.9	96.2	113.4	86.5	5.15	7.2	2.66	3.85	High	High	High	High	High	High	High	High	High	High	High	High
FALSE	High	Master Protein	Dlo_pri0952F.1_g00200.1	Dlo_pri0952F.1_g00200.1	0	113.462	35	11	64	8	582	65	6.84	2064	11	0	4	2.04	0.942	1.79	0.462	0.877	1.901	2.11032e-05	1	2.51331e-05	8.71737e-06	0.153772	2.35918e-05	69.3	141.4	65.3	124.1	2.74	1.95	2.83	1.4	High	High	High	High	High	High	High	High	High	High	High	High
FALSE	High	Master Protein	Dlo_pri0137F.1_g00650.1	Dlo_pri0137F.1_g00650.1	0	96.429	40	11	64	11	384	41.8	7.2	1310	11	0	0	0.93	1.162	0.949	1.249	1.02	0.817	1	1	1	1	1	1	99	92.1	115	94	2.34	6.38	4.25	1.77	High	High	High	High	High	High	High	High	High	High	High	High
FALSE	High	Master Protein	Dlo_pri0132F.1_g00160.1	Dlo_pri0132F.1_g00160.1	0	142.701	34	21	63	3	809	89.6	5.11	1739	21	0	19	0.858	1.222	0.985	1.424	1.148	0.806	1	1	1	0.132353	1	0.970558	98.4	84.4	120.2	96.9	1.45	2.76	1.53	2.56	Not Found	High	High	Not Found	High	High	Not Found	High	High	Not Found	High	High
FALSE	High	Master Protein	Dlo_pri0016F.1_g05520.1	Dlo_pri0016F.1_g05520.1	0	81.241	67	7	62	6	155	15.9	7.2	1813	7	0	1	0.925	0.805	0.802	0.87	0.867	0.996	1	1	0.624586	1	1	1	113.2	104.8	91.2	90.8	1.85	1.06	2.68	1.12	High	High	High	High	High	High	High	High	High	High	High	High
FALSE	High	Master Protein	Dlo_alt0304F-007-01.1_g00030.1	Dlo_alt0304F-007-01.1_g00030.1	0	115.605	38	8	62	4	392	42.2	7.17	1776	8	0	5	1.193	0.862	1.179	0.723	0.988	1.368	1	1	1	1	1	1	94.5	112.7	81.4	111.4	1.37	3.37	2.14	0.89	High	High	High	High	High	High	High	High	High	High	High	High
FALSE	High	Master Protein	Dlo_pri0002F.1_g05280.1	Dlo_pri0002F.1_g05280.1	0	85.328	41	13	62	5	413	46.9	5.58	1407	13	0	9	0.877	0.929	0.86	1.06	0.981	0.925	1	1	1	1	1	1	109.1	95.7	101.4	93.8	0.58	0.69	1.34	1.48	High	High	High	High	High	High	High	High	High	High	High	High
FALSE	High	Master Protein	Dlo_pri0229F.1_g01810.1	Dlo_pri0229F.1_g01810.1	0	67.043	32	11	61	8	421	48	6.09	1312	11	0	0	0.946	0.961	1.003	1.015	1.06	1.044	1	1	1	1	1	1	102.3	96.8	98.3	102.6	1.97	3.57	4.09	1.69	High	High	High	High	High	High	High	High	High	High	High	High
FALSE	High	Master Protein	Dlo_pri0002F.1_g03430.1	Dlo_pri0002F.1_g03430.1	0	146.022	34	23	61	19	805	92.5	6.51	1710	23	0	0	1.027	1.006	1.337	0.98	1.302	1.329	1	1	1	1	1	1	91.5	94	92.1	122.4	0.72	1.08	0.15	0.77	High	High	High	High	High	High	High	High	High	High	High	High
FALSE	High	Master Protein	Dlo_alt0360F-001-01.1_g00110.1	Dlo_alt0360F-001-01.1_g00110.1	0	119.765	37	11	60	10	428	47.5	7.88	1810	11	0	1	1.568	1.005	1.411	0.641	0.9	1.405	1	1	1	1	1	1	80.3	125.8	80.6	113.3	3.3	3.36	4.27	1.45	High	High	High	High	High	High	High	High	High	High	High	High
FALSE	High	Master Protein	Dlo_pri0176F.1_g00080.1	Dlo_pri0176F.1_g00080.1	0	81.621	33	17	60	6	595	65	6.7	1401	17	0	11	0.967	1.154	1.013	1.193	1.047	0.878	1	1	1	1	1	1	96.8	93.6	111.6	98	0.78	2.08	0.87	0.53	High	High	High	High	High	High	High	High	High	High	High	High
FALSE	High	Master Protein	Dlo_pri0064F.1_g03250.1	Dlo_pri0064F.1_g03250.1	0	114.512	47	16	60	6	447	48.8	5.53	1870	16	0	0	1.135	0.916	1.073	0.807	0.945	1.171	1	1	1	1	1	1	97	110.1	88.8	104	6.94	2.52	7.22	3.2	High	High	High	High	High	High	High	High	High	High	High	High
FALSE	High	Master Protein	Dlo_pri0143F.1_g01600.1	Dlo_pri0143F.1_g01600.1	0	32.273	34	7	59	3	192	19.5	6.99	1181	7	0	4	1.037	0.931	0.851	0.898	0.82	0.913	1	1	1	1	1	1	104.7	108.6	97.6	89.1	1.5	1.81	0.76	0.73	High	High	High	High	High	High	High	High	High	High	High	High
FALSE	High	Master Protein	Dlo_pri0042F.1_g01950.1	Dlo_pri0042F.1_g01950.1	0	79.949	46	11	59	10	308	34	5.72	1513	11	0	1	0.87	1.067	0.903	1.226	1.038	0.847	1	1	1	1	1	1	104.2	90.6	111.1	94.1	0.96	2.52	3.63	3.71	High	High	High	High	High	High	High	High	High	High	High	High
FALSE	High	Master Protein	Dlo_pri0379F.1_g00610.1	Dlo_pri0379F.1_g00610.1	0	92.801	41	14	59	14	416	45.5	6.8	1381	14	0	0	1.074	1.019	1.08	0.949	1.006	1.06	1	1	1	1	1	1	95.9	102.9	97.7	103.5	4.67	4.15	5.2	4.83	High	High	High	High	High	High	High	High	High	High	High	High
FALSE	High	Master Protein	Dlo_pri0508F.1_g00970.1	Dlo_pri0508F.1_g00970.1	0	104.915	30	15	58	4	575	61.2	6.38	1336	15	0	0	0.788	1.015	0.829	1.288	1.052	0.817	0.610877	1	1	0.440663	1	0.962957	110.1	86.8	111.8	91.3	1.72	2.36	2.02	2.2	High	High	High	High	High	High	High	High	High	High	High	High
FALSE	High	Master Protein	Dlo_pri0057F.1_g02300.1	Dlo_pri0057F.1_g02300.1	0	127.524	63	14	58	12	345	36	8.56	1713	14	0	2	0.902	0.938	0.794	1.039	0.88	0.847	1	1	1	1	1	1	110.1	99.3	103.2	87.4	2.7	1.3	0.52	1.55	High	High	High	High	High	High	High	High	High	High	High	High
FALSE	High	Master Protein	Dlo_pri0236F.1_g01390.1	Dlo_pri0236F.1_g01390.1	0	91.94	37	17	58	6	556	60.6	6.02	1278	17	0	0	0.722	1.131	0.794	1.565	1.099	0.702	1	1	1	1	1	1	109.7	79.2	124	87.1	1.31	3.38	3.77	4.11	High	High	High	High	High	High	High	High	High	High	High	High
FALSE	High	Master Protein	Dlo_pri0046F.1_g03210.1	Dlo_pri0046F.1_g03210.1	0	83.936	31	12	58	4	503	56.7	5.78	1438	12	0	0	0.949	0.933	0.877	0.983	0.924	0.94	1	1	1	1	1	1	106.4	101	99.3	93.3	3.83	3.9	5.35	5.71	High	High	High	High	High	High	High	High	High	High	High	High
FALSE	High	Master Protein	Dlo_pri0148F.1_g01390.1	Dlo_pri0148F.1_g01390.1	0	140.009	32	23	57	14	948	105.6	5.91	1482	23	0	9	0.829	0.921	0.94	1.111	1.134	1.021	1	1	1	1	1	1	108.4	89.9	99.8	101.9	0.87	2.37	2.95	0.4	High	High	High	High	High	High	High	High	High	High	High	High
FALSE	High	Master Protein	Dlo_pri0160F.1_g00550.1	Dlo_pri0160F.1_g00550.1	0	64.591	51	11	57	4	261	29.4	4.74	1326	11	0	0	0.96	1.058	0.904	1.102	0.941	0.854	1	1	1	1	1	1	102	97.9	107.9	92.2	3.9	2.22	4.55	1.8	High	High	High	High	High	High	High	High	High	High	High	High
FALSE	High	Master Protein	Dlo_pri0181F.1_g00270.1	Dlo_pri0181F.1_g00270.1	0	121.244	30	19	57	16	853	93.8	5.17	1421	19	0	4	0.895	0.952	0.97	1.063	1.083	1.019	1	1	1	1	1	1	104.8	93.8	99.8	101.6	2.2	2.57	1.09	1.12	High	High	High	High	High	High	High	High	High	High	High	High
FALSE	High	Master Protein	Dlo_pri0065F.1_g02980.1	Dlo_pri0065F.1_g02980.1	0	128.657	46	17	57	13	523	54.7	5.59	1732	17	0	0	0.993	0.869	1.05	0.875	1.057	1.209	1	1	1	1	1	1	102.3	101.6	88.8	107.4	3.3	2.91	3.77	3.6	High	High	High	High	High	High	High	High	High	High	High	High
FALSE	High	Master Protein	Dlo_pri0497F.1_g01060.1	Dlo_pri0497F.1_g01060.1	0	80.511	10	10	57	1	1079	122.2	7.28	1588	10	0	0	1.481	0.837	2.203	0.565	1.487	2.632	1	1	0.287382	0.554694	1	0.0804572	72.4	107.3	60.6	159.6	3.75	2.09	10.07	4.71	High	High	High	High	High	High	High	High	High	High	High	High
FALSE	High	Master Protein	Dlo_pri0150F.1_g01490.1	Dlo_pri0150F.1_g01490.1	0	96.169	38	16	56	9	587	65.4	5.07	1318	16	0	8	0.694	0.906	0.878	1.304	1.264	0.969	0.380501	1	1	1	1	1	115	79.9	104.2	101	0.96	3.29	2.21	0.65	High	High	High	High	High	High	High	High	High	High	High	High
FALSE	High	Master Protein	Dlo_pri0004F.1_g07700.1	Dlo_pri0004F.1_g07700.1	0	117.015	37	12	56	12	486	52.8	8.85	1683	12	0	0	1.075	0.859	0.874	0.799	0.813	1.018	1	1	1	0.31283	0.629054	1	105.1	112.9	90.2	91.8	0.66	0.33	0.9	0.47	High	High	High	High	High	High	High	High	High	High	High	High
FALSE	High	Master Protein	Dlo_alt0253F-007-01.1_g00100.1	Dlo_alt0253F-007-01.1_g00100.1	0	89.209	27	8	55	8	460	51.2	7.46	1803	8	0	0	0.874	0.914	0.914	1.046	1.045	0.999	1	1	1	1	1	1	108.1	94.4	98.8	98.7	2.8	1.98	1.96	0.87	High	High	High	High	High	High	High	High	High	High	High	High
FALSE	High	Master Protein	Dlo_pri0597F.1_g00450.1	Dlo_pri0597F.1_g00450.1	0	87.394	46	13	55	9	399	45	8	1595	13	0	5	0.82	1.086	0.993	1.324	1.211	0.914	1	1	1	0.515272	1	1	102.6	84.1	111.4	101.9	2.34	2.17	2.02	1.6	High	High	High	High	High	High	High	High	High	High	High	High
FALSE	High	Master Protein	Dlo_pri0031F.1_g04800.1	Dlo_pri0031F.1_g04800.1	0	68.189	45	12	55	8	253	28.6	4.86	1142	12	0	0	1.111	0.907	1.003	0.816	0.903	1.106	1	1	1	1	1	1	99.5	110.5	90.2	99.8	0.68	1.36	1.8	0.69	High	High	High	High	High	High	High	High	High	High	High	High
FALSE	High	Master Protein	Dlo_pri0010F.1_g04150.1	Dlo_pri0010F.1_g04150.1	0	80.723	39	8	55	8	221	25.1	6.93	1533	8	0	0	0.825	0.88	0.821	1.067	0.996	0.933	1	1	1	1	1	1	113.4	93.6	99.8	93.2	2.99	3.04	0.81	3.03	High	High	High	High	High	High	High	High	High	High	High	High
FALSE	High	Master Protein	Dlo_pri0505F.1_g00280.1	Dlo_pri0505F.1_g00280.1	0	87.453	36	12	54	4	378	41.2	9.85	1526	12	0	0	1.064	0.964	0.999	0.906	0.94	1.037	1	1	1	1	1	1	99.3	105.6	95.7	99.3	1.83	1	0.98	1.61	High	High	High	High	High	High	High	High	High	High	High	High
FALSE	High	Master Protein	Dlo_pri0117F.1_g00990.1	Dlo_pri0117F.1_g00990.1	0	124.382	29	18	54	18	682	74.3	7.91	1220	18	0	0	0.934	0.935	1.065	1.001	1.14	1.138	1	1	1	1	1	1	101.7	95	95.1	108.2	2.46	2.99	1.85	1.23	High	High	High	High	High	High	High	High	High	High	High	High
FALSE	High	Master Protein	Dlo_pri0182F.1_g01950.1	Dlo_pri0182F.1_g01950.1	0	46.573	18	6	54	3	358	38.5	7.72	1461	6	0	0	0.926	0.888	0.859	0.959	0.927	0.967	1	1	1	1	1	1	108.9	100.9	96.7	93.5	18.64	8.04	19.32	6.94	High	High	Not Found	High	High	Not Found	High	High	Not Found	High	High	Not Found
FALSE	High	Master Protein	Dlo_pri0041F.1_g01820.1	Dlo_pri0041F.1_g01820.1	0	82.113	20	19	53	4	966	110.4	6.68	1031	19	0	4	1.006	1.062	0.924	1.056	0.919	0.87	1	1	1	1	1	1	100.2	100.8	106.4	92.6	1.31	2.21	3.63	3.84	High	High	High	High	High	High	High	High	High	High	High	High
FALSE	High	Master Protein	Dlo_pri0347F.1_g00670.1	Dlo_pri0347F.1_g00670.1	0	111.095	39	16	52	16	580	63.8	8.25	1376	16	0	0	1.222	1.444	1.092	1.181	0.893	0.756	1	0.588691	1	1	1	0.755917	84.1	102.8	121.4	91.8	1.17	2	2.27	1.81	High	High	High	High	High	High	High	High	High	High	High	High
FALSE	High	Master Protein	Dlo_pri0105F.1_g00160.1	Dlo_pri0105F.1_g00160.1	0	106.505	34	15	52	8	580	65.3	5.74	1504	15	0	7	0.997	1.013	0.984	1.016	0.987	0.971	1	1	1	1	1	1	100.1	99.9	101.5	98.5	1.39	0.77	2.34	2.15	High	High	High	High	High	High	High	High	High	High	High	High
FALSE	High	Master Protein	Dlo_pri0981F.1_g00100.1	Dlo_pri0981F.1_g00100.1	0	71.14	35	14	52	8	451	50.5	7.65	1074	14	0	6	1.161	0.975	1.104	0.84	0.95	1.132	1	1	1	1	1	1	94.3	109.6	92	104.1	2.92	1.22	0.75	0.91	High	High	High	High	High	High	High	High	High	High	High	High
FALSE	High	Master Protein	Dlo_pri0981F.1_g00210.1	Dlo_pri0981F.1_g00210.1	0	115.108	28	21	52	8	956	105.2	6.7	1184	21	0	13	1.313	1.125	1.367	0.857	1.042	1.216	1	1	1	1	1	1	83.2	109.3	93.6	113.8	0.74	3.14	2.78	1.35	High	High	High	High	High	High	High	High	High	High	High	High
FALSE	High	Master Protein	Dlo_pri0074F.1_g01700.1	Dlo_pri0074F.1_g01700.1	0	126.361	28	23	52	23	1023	112.4	6.9	1284	23	0	0	0.892	1.093	1.087	1.226	1.219	0.994	0.231103	0.926368	0.813742	0.0111211	0.0358733	1	98.2	87.6	107.4	106.8	1.07	0.81	1.75	1.28	High	High	High	High	High	High	High	High	High	High	High	High
FALSE	High	Master Protein	Dlo_pri0101F.1_g02010.1	Dlo_pri0101F.1_g02010.1	0	71.115	37	13	51	10	389	44.3	10.11	1395	13	0	3	0.996	0.968	0.93	0.971	0.933	0.961	1	1	1	1	1	1	102.7	102.4	99.4	95.5	0.28	1.81	2.76	1.21	High	High	High	High	High	High	High	High	High	High	High	High
FALSE	High	Master Protein	Dlo_pri0120F.1_g01910.1	Dlo_pri0120F.1_g01910.1	0	56.576	42	5	51	4	145	15.4	5.72	1573	5	0	0	1.281	1.564	0.843	1.221	0.658	0.539	0.490232	0.137968	1	1	0.112205	0.0154505	85.3	109.3	133.4	71.9	1.93	0.99	3.29	4.74	High	High	High	High	High	High	High	High	High	High	High	High
FALSE	High	Master Protein	Dlo_pri0318F.1_g00570.1	Dlo_pri0318F.1_g00570.1	0	99.819	35	10	50	6	440	49.2	8.53	1390	10	0	0	0.814	1.023	1.152	1.257	1.415	1.126	1	1	1	1	1	1	100.3	81.6	102.6	115.5	0.7	8.07	7.51	1.62	High	High	High	High	High	High	High	High	High	High	High	High
FALSE	High	Master Protein	Dlo_pri0057F.1_g02640.1	Dlo_pri0057F.1_g02640.1	0	82.7	21	19	50	5	965	110.1	6.02	1056	19	0	0	0.983	1.038	1.147	1.055	1.166	1.105	1	1	1	1	1	1	96	94.4	99.6	110.1	2.69	2.32	2.27	4.67	High	High	High	High	High	High	High	High	High	High	High	High
FALSE	High	Master Protein	Dlo_pri0016F.1_g00810.1	Dlo_pri0016F.1_g00810.1	0	90.082	31	13	49	5	599	63.1	6.68	1489	13	0	0	1.431	0.967	1.272	0.676	0.889	1.315	1	1	1	1	1	1	85.6	122.6	82.8	108.9	6.02	12.2	9.68	1.6	High	High	High	High	High	High	High	High	High	High	High	High
FALSE	High	Master Protein	Dlo_alt0471F-001-01.1_g00270.1	Dlo_alt0471F-001-01.1_g00270.1	0	68.614	6	6	49	1	1104	125.5	5.06	1186	6	0	0	0.928	1.126	0.732	1.213	0.789	0.65	1	1	1	1	1	1	105.7	98.1	118.9	77.3	3.15	11.98	6.92	0.27	Not Found	High	High	Not Found	High	High	Not Found	High	High	Not Found	High	High
FALSE	High	Master Protein	Dlo_pri0320F.1_g01210.1	Dlo_pri0320F.1_g01210.1	0	120.972	26	20	49	11	949	106.1	5.83	1346	20	0	0	0.751	0.88	0.835	1.172	1.112	0.949	1	1	1	1	1	1	115.4	86.7	101.5	96.4	2.63	6.28	3.93	1.33	High	High	High	High	High	High	High	High	High	High	High	High
FALSE	High	Master Protein	Dlo_pri0398F.1_g00450.1	Dlo_pri0398F.1_g00450.1	0	80.117	57	14	49	1	251	28.1	9.41	1195	14	0	0	0.984	1.014	0.904	1.031	0.919	0.892	1	1	1	1	1	1	102.5	100.9	104	92.7	10.01	3.01	7.78	6.8	High	High	High	High	High	High	High	High	High	High	High	High
FALSE	High	Master Protein	Dlo_pri0337F.1_g00850.1	Dlo_pri0337F.1_g00850.1	0	61.778	32	10	49	10	356	38.9	6.44	1445	10	0	0	1.071	0.972	1.008	0.907	0.941	1.037	1	1	1	1	1	1	98.7	105.8	95.9	99.5	0.11	1.25	1.14	0.48	High	High	High	High	High	High	High	High	High	High	High	High
FALSE	High	Master Protein	Dlo_pri0290F.1_g00500.1	Dlo_pri0290F.1_g00500.1	0	107.237	23	17	49	17	965	107.2	5.31	1137	17	0	0	0.907	0.952	0.962	1.05	1.061	1.011	1	1	1	1	1	1	104.7	94.9	99.7	100.7	2.13	2.21	1.75	1.6	High	High	High	High	High	High	High	High	High	High	High	High
FALSE	High	Master Protein	Dlo_alt0001F-025-01.1_g00020.1	Dlo_alt0001F-025-01.1_g00020.1	0	71.883	34	7	49	7	283	31.8	9.64	1447	7	0	0	0.911	0.859	0.919	0.944	1.009	1.069	1	0.99885	1	1	1	1	108.4	98.7	93.2	99.6	1.48	3.75	0.64	1.93	High	High	High	High	High	High	High	High	High	High	High	High
FALSE	High	Master Protein	Dlo_pri0041F.1_g04000.1	Dlo_pri0041F.1_g04000.1	0	141.021	38	23	48	14	811	89.1	5.21	1174	23	0	9	0.982	0.962	0.972	0.98	0.99	1.01	1	1	1	1	1	1	102.1	100.3	98.3	99.3	1.65	1.18	1.06	0.29	High	High	High	High	High	High	High	High	High	High	High	High
FALSE	High	Master Protein	Dlo_pri0268F.1_g01370.1	Dlo_pri0268F.1_g01370.1	0	86.492	34	15	48	15	512	58.5	7.65	1157	15	0	0	1.089	0.883	1.087	0.811	0.998	1.231	1	1	1	1	1	1	98.5	107.3	87	107.1	1.26	1.57	1.34	2.67	High	High	High	High	High	High	High	High	High	High	High	High
FALSE	High	Master Protein	Dlo_pri0065F.1_g01000.1	Dlo_pri0065F.1_g01000.1	0	81.392	28	11	48	10	465	52.3	8.02	1334	11	0	1	0.884	1.07	0.914	1.21	1.033	0.854	1	1	1	1	1	1	103.4	91.4	110.7	94.5	0.38	0.77	2.01	1.31	High	High	High	High	High	High	High	High	High	High	High	High
FALSE	High	Master Protein	Dlo_pri0128F.1_g00280.1	Dlo_pri0128F.1_g00280.1	0	121.322	21	14	48	8	1025	113.6	5.07	1601	14	0	6	0.906	0.898	0.932	0.991	1.028	1.038	1	1	1	1	1	1	107.1	97	96.1	99.8	0.55	3.22	2.52	1.45	High	High	High	High	High	High	High	High	High	High	High	High
FALSE	High	Master Protein	Dlo_pri0040F.1_g01590.1	Dlo_pri0040F.1_g01590.1	0	96.976	19	13	48	3	783	87	7.24	1474	13	0	0	0.965	0.752	1.04	0.78	1.078	1.382	1	1	1	1	1	1	106.5	102.7	80.1	110.7	4.65	1.57	2.1	4.46	High	High	High	High	High	High	High	High	High	High	High	High
FALSE	High	Master Protein	Dlo_pri0497F.1_g00860.1	Dlo_pri0497F.1_g00860.1	0	82.204	41	7	47	7	229	26.2	6.07	1141	7	0	0	0.71	0.768	0.659	1.081	0.927	0.857	1	1	1	1	1	1	127.5	90.6	97.9	84	1.68	1.8	1.88	2.39	High	High	High	High	High	High	High	High	High	High	High	High
FALSE	High	Master Protein	Dlo_pri0138F.1_g01030.1	Dlo_pri0138F.1_g01030.1	0	74.607	45	9	47	9	234	25.8	5.16	1409	9	0	0	0.427	1.352	0.807	3.166	1.89	0.597	0.217475	1	1	0.0395903	0.784529	1	111.6	47.6	150.8	90	0.55	2.43	1.2	1.48	High	High	High	High	High	High	High	High	High	High	High	High
FALSE	High	Master Protein	Dlo_pri0320F.1_g00250.1	Dlo_pri0320F.1_g00250.1	0	63.404	57	10	47	10	237	25.9	4.83	1291	10	0	0	0.924	1.084	0.927	1.174	1.004	0.855	1	1	1	1	1	1	101.6	93.9	110.2	94.3	0.83	0.64	0.62	1.09	High	High	High	High	High	High	High	High	High	High	High	High
FALSE	High	Master Protein	Dlo_pri0520F.1_g00660.1	Dlo_pri0520F.1_g00660.1	0	91.635	23	11	47	1	648	71	5.68	1573	11	0	0	1.775	1.01	0.997	0.569	0.562	0.988	1	1	1	1	1	1	83.7	148.5	84.5	83.4	17.72	7.35	16.35	13.3	High	High	High	High	High	High	High	High	High	High	High	High
FALSE	High	Master Protein	Dlo_pri0018F.1_g05520.1	Dlo_pri0018F.1_g05520.1	0	112.052	25	22	47	19	1057	118.4	6.49	1164	22	0	3	0.944	1.016	1.064	1.076	1.127	1.048	1	1	1	1	1	1	99.4	93.8	101	105.8	2.24	0.98	3.07	1.46	High	High	High	High	High	High	High	High	High	High	High	High
FALSE	High	Master Protein	Dlo_pri0035F.1_g03570.1	Dlo_pri0035F.1_g03570.1	0	72.412	64	13	47	9	247	27.9	4.82	884	13	0	1	1.228	1.054	1.024	0.859	0.834	0.971	1	1	1	1	1	1	92.9	114.1	97.9	95.1	2.45	5.16	4.98	0.68	High	High	High	High	High	High	High	High	High	High	High	High
FALSE	High	Master Protein	Dlo_pri0002F.1_g04970.1	Dlo_pri0002F.1_g04970.1	0	77.414	45	14	47	1	320	35.2	9.22	1130	14	0	14	1.197	1.002	1.016	0.837	0.848	1.014	1	1	1	1	1	1	94.9	113.6	95.1	96.4	1.67	1.84	1.81	1.61	High	Not Found	High	High	Not Found	High	High	Not Found	High	High	Not Found	High
FALSE	High	Master Protein	Dlo_pri0024F.1_g05180.1	Dlo_pri0024F.1_g05180.1	0	82.956	42	7	47	7	228	25.1	7.65	1514	7	0	0	1.316	0.989	1.092	0.751	0.83	1.105	1	1	1	1	1	1	91	119.7	89.9	99.4	0.75	4.04	3.42	3.19	High	High	High	High	High	High	High	High	High	High	High	High
FALSE	High	Master Protein	Dlo_pri1312F.1_g00130.1	Dlo_pri1312F.1_g00130.1	0	79.363	23	17	47	17	813	91.6	7.42	1204	17	0	0	0.837	0.99	0.866	1.183	1.035	0.874	1	1	1	1	1	1	108.3	90.6	107.3	93.8	0.71	0.3	1.96	1.26	High	High	High	High	High	High	High	High	High	High	High	High
FALSE	High	Master Protein	Dlo_pri0095F.1_g02530.1	Dlo_pri0095F.1_g02530.1	0	97.524	30	16	47	16	704	79.4	7.53	1277	16	0	0	0.952	1.009	0.943	1.06	0.991	0.934	1	1	1	1	1	1	102.4	97.5	103.4	96.6	1.18	2.1	0.74	0.54	High	High	High	High	High	High	High	High	High	High	High	High
FALSE	High	Master Protein	Dlo_pri0023F.1_g00170.1	Dlo_pri0023F.1_g00170.1	0	73.517	51	10	46	10	202	23	8.22	1297	10	0	0	0.881	1.053	0.859	1.195	0.976	0.816	1	1	1	1	1	1	105.5	92.9	111	90.6	0.71	0.27	1.47	1.68	High	High	High	High	High	High	High	High	High	High	High	High
FALSE	High	Master Protein	Dlo_pri0926F.1_g00050.1	Dlo_pri0926F.1_g00050.1	0	53.494	15	10	46	8	743	84.2	5.44	984	10	0	2	1.091	1.142	1.129	1.047	1.034	0.988	1	1	1	1	1	1	91.7	100.1	104.7	103.5	0.43	4.7	2.33	2.13	High	High	High	High	High	High	High	High	High	High	High	High
FALSE	High	Master Protein	Dlo_pri0001F.1_g12400.1	Dlo_pri0001F.1_g12400.1	0	86.892	40	16	46	15	518	59.4	6.71	1293	16	0	1	1.047	0.968	1.04	0.925	0.993	1.074	1	1	1	1	1	1	98.6	103.3	95.5	102.6	1.04	3.43	2.9	0.65	High	High	High	High	High	High	High	High	High	High	High	High
FALSE	High	Master Protein	Dlo_pri0236F.1_g01240.1	Dlo_pri0236F.1_g01240.1	0	78.651	45	10	46	9	323	36.3	6.2	1308	10	0	1	0.576	0.906	0.39	1.575	0.677	0.43	0.231103	1	0.0288491	0.425557	0.816541	0.0334286	139.3	80.2	126.3	54.3	0.35	1.9	1.21	1.87	High	High	High	High	High	High	High	High	High	High	High	High
FALSE	High	Master Protein	Dlo_pri0170F.1_g01840.1	Dlo_pri0170F.1_g01840.1	0	41.477	27	10	46	10	383	42.8	10.01	1142	10	0	0	1.105	0.904	1.025	0.818	0.928	1.134	1	1	1	1	1	1	99.2	109.6	89.6	101.6	2.63	2.99	3.81	2.86	High	High	High	High	High	High	High	High	High	High	High	High
FALSE	High	Master Protein	Dlo_pri0140F.1_g02150.1	Dlo_pri0140F.1_g02150.1	0	51.223	41	9	45	9	249	27.3	6.54	1099	9	0	0	1.018	1.057	0.977	1.038	0.96	0.924	1	1	1	1	1	1	98.7	100.5	104.4	96.4	1.2	2.26	2.36	0.27	High	High	High	High	High	High	High	High	High	High	High	High
FALSE	High	Master Protein	Dlo_pri0076F.1_g00990.1	Dlo_pri0076F.1_g00990.1	0	83.715	26	14	45	13	703	77.2	6.02	1445	14	0	1	0.998	0.927	1.005	0.929	1.007	1.085	1	1	1	1	1	1	101.8	101.6	94.3	102.3	1.99	1.79	2.97	2.07	High	High	High	High	High	High	High	High	High	High	High	High
FALSE	High	Master Protein	Dlo_pri0233F.1_g00630.1	Dlo_pri0233F.1_g00630.1	0	57.262	44	8	45	7	250	27.4	6.07	1278	8	0	1	1.018	1.059	1.099	1.04	1.08	1.038	1	1	1	1	1	1	95.8	97.5	101.4	105.3	1.22	1.76	2.13	1.31	High	High	High	High	High	High	High	High	High	High	High	High
FALSE	High	Master Protein	Dlo_pri0040F.1_g00080.1	Dlo_pri0040F.1_g00080.1	0	40.839	42	4	44	2	146	16	6.51	1181	4	0	3	0.797	1.208	1.247	1.516	1.565	1.033	1	1	1	1	1	1	94.1	75	113.6	117.3	3.27	6.97	4.64	2.47	High	High	High	High	High	High	High	High	High	High	High	High
FALSE	High	Master Protein	Dlo_pri0028F.1_g03170.1	Dlo_pri0028F.1_g03170.1	0	91.956	24	13	44	1	671	77.2	5.17	1200	13	0	7	0.614	0.92	0.729	1.497	1.187	0.793	0.219955	1	0.813742	0.411155	1	1	122.6	75.3	112.7	89.4	6.59	6.21	1.24	3.19	High	Not Found	Not Found	High	Not Found	Not Found	High	Not Found	Not Found	High	Not Found	Not Found
FALSE	High	Master Protein	Dlo_pri0084F.1_g01190.1	Dlo_pri0084F.1_g01190.1	0	111.035	24	22	44	22	1187	131.3	5.96	1096	22	0	0	1.048	0.949	0.872	0.905	0.832	0.919	1	1	1	1	1	1	103.4	108.4	98.1	90.2	1.08	1.45	2.29	2.9	High	High	High	High	High	High	High	High	High	High	High	High
FALSE	High	Master Protein	Dlo_pri0057F.1_g01140.1	Dlo_pri0057F.1_g01140.1	0	87.997	28	17	44	17	746	81.9	6.3	1158	17	0	0	0.969	1.093	1.001	1.129	1.033	0.916	1	1	1	1	1	1	98.4	95.4	107.6	98.6	0.73	4.15	3.05	0.8	High	High	High	High	High	High	High	High	High	High	High	High
FALSE	High	Master Protein	Dlo_alt0001F-033-01.1_g00040.1	Dlo_alt0001F-033-01.1_g00040.1	0	98.34	22	17	44	5	990	109.2	6.44	1076	17	0	0	1.407	1.239	1.434	0.881	1.019	1.157	1	1	1	1	1	1	78.7	110.8	97.6	112.9	11.74	10.87	1.82	1.92	High	High	High	High	High	High	High	High	High	High	High	High
FALSE	High	Master Protein	Dlo_pri1112F.1_g00020.1	Dlo_pri1112F.1_g00020.1	0	81.581	29	11	44	10	448	47.5	8.7	1235	11	0	1	1.088	0.887	1.002	0.816	0.921	1.13	1	1	1	1	1	1	100.6	109.4	89.2	100.8	1.31	0.9	3.16	0.93	High	High	High	High	High	High	High	High	High	High	High	High
FALSE	High	Master Protein	Dlo_pri0129F.1_g00310.1	Dlo_pri0129F.1_g00310.1	0	67.171	18	4	44	4	252	26	6.3	1152	4	0	0	1.36	1.077	0.957	0.792	0.703	0.888	0.724947	1	1	1	0.622368	1	91	123.8	98	87.1	4.14	2.17	2.83	2.83	High	High	High	High	High	High	High	High	High	High	High	High
FALSE	High	Master Protein	Dlo_pri0278F.1_g01710.1	Dlo_pri0278F.1_g01710.1	0	84.051	33	15	43	15	562	60.6	7.12	1097	15	0	0	0.913	1.172	0.925	1.283	1.013	0.789	1	1	1	1	1	1	99.8	91.1	116.9	92.3	1.5	2.23	1.47	1.8	High	High	High	High	High	High	High	High	High	High	High	High
FALSE	High	Master Protein	Dlo_pri0002F.1_g08080.1	Dlo_pri0002F.1_g08080.1	0	73.02	31	11	43	11	379	41.2	5.95	959	11	0	0	1.011	0.863	0.975	0.853	0.964	1.13	1	1	1	1	1	1	103.9	105.1	89.6	101.3	1.46	0.89	0.67	0.82	High	High	High	High	High	High	High	High	High	High	High	High
FALSE	High	Master Protein	Dlo_pri0025F.1_g02950.1	Dlo_pri0025F.1_g02950.1	0	71.41	18	13	43	11	854	95.2	7.43	900	13	0	2	0.606	0.901	1.857	1.486	3.063	2.06	0.261657	1	0.144692	0.504296	0.00860343	0.0486535	91.6	55.6	82.6	170.2	0.77	6.15	2.09	3.54	High	High	High	High	High	High	High	High	High	High	High	High
FALSE	High	Master Protein	Dlo_pri0022F.1_g06780.1	Dlo_pri0022F.1_g06780.1	0	48.196	55	8	43	6	166	17.8	5.57	1168	8	0	2	1.147	1.02	1.101	0.89	0.96	1.079	1	1	1	1	1	1	93.7	107.5	95.6	103.2	3.46	1.31	2.04	1.73	High	High	High	High	High	High	High	High	High	High	High	High
FALSE	High	Master Protein	Dlo_pri0060F.1_g01900.1	Dlo_pri0060F.1_g01900.1	0	86.598	31	16	43	6	677	72.8	6.1	1212	16	0	0	0.739	1.026	0.757	1.389	1.024	0.737	1	1	1	1	1	1	113.6	83.9	116.6	85.9	0.22	2.56	1.93	0.84	High	High	High	High	High	High	High	High	High	High	High	High
FALSE	High	Master Protein	Dlo_alt0183F-011-01.1_g00030.1	Dlo_alt0183F-011-01.1_g00030.1	0	64.397	24	8	43	8	417	47.3	9.09	1205	8	0	0	1.132	1.04	0.855	0.919	0.756	0.822	1	1	1	1	1	1	99.3	112.4	103.3	85	0.93	0.62	1.92	2.27	High	High	High	High	High	High	High	High	High	High	High	High
FALSE	High	Master Protein	Dlo_pri0076F.1_g02380.1	Dlo_pri0076F.1_g02380.1	0	83.001	45	11	43	4	271	29.8	10.26	1115	11	0	7	1.049	0.903	1.012	0.861	0.965	1.12	1	1	1	1	1	1	100.9	105.8	91.2	102.1	2.88	1.53	4.84	1.32	High	High	High	High	High	High	High	High	High	High	High	High
FALSE	High	Master Protein	Dlo_pri0053F.1_g03670.1	Dlo_pri0053F.1_g03670.1	0	44.991	30	7	42	7	239	25.8	5.6	1148	7	0	0	1.02	0.822	1.088	0.806	1.067	1.324	1	1	1	1	1	1	101.8	103.8	83.6	110.8	1.16	0.7	0.55	0.49	High	High	High	High	High	High	High	High	High	High	High	High
FALSE	High	Master Protein	Dlo_pri0074F.1_g03880.1	Dlo_pri0074F.1_g03880.1	0	53.189	49	9	42	6	195	22.2	9.55	923	9	0	3	1.061	1.001	0.98	0.944	0.923	0.978	1	1	1	1	1	1	99	105	99.1	97	1.37	3.07	2.62	0.91	High	High	High	High	High	High	High	High	High	High	High	High
FALSE	High	Master Protein	Dlo_pri0047F.1_g03220.1	Dlo_pri0047F.1_g03220.1	0	94.707	26	17	42	14	900	100.7	5.52	1023	17	0	3	0.73	1.012	0.752	1.385	1.03	0.744	1	1	1	1	1	1	114.5	83.6	115.8	86.1	2.24	4.96	1.8	0.46	High	High	High	High	High	High	High	High	High	High	High	High
FALSE	High	Master Protein	Dlo_pri0024F.1_g00240.1	Dlo_pri0024F.1_g00240.1	0	60.935	21	8	42	1	454	50.1	4.96	1099	8	0	0	0.975	0.786	1.018	0.806	1.044	1.295							105.8	103.2	83.2	107.7					Not Found	High	Not Found	Not Found	High	Not Found	Not Found	High	Not Found	Not Found	High	Not Found
FALSE	High	Master Protein	Dlo_pri0037F.1_g02010.1	Dlo_pri0037F.1_g02010.1	0	30.281	11	4	42	2	297	31.9	8.44	1013	4	0	3	1.32	2.071	2.897	1.569	2.195	1.399	1	0.137968	0.0140504	0.383037	0.066345	1	54.9	72.4	113.7	159	4.45	2.95	2.9	3.18	High	High	High	High	High	High	High	High	High	High	High	High
FALSE	High	Master Protein	Dlo_pri0016F.1_g07170.1	Dlo_pri0016F.1_g07170.1	0	69.791	28	13	42	12	538	60.1	6.57	946	13	0	1	0.873	0.922	0.851	1.056	0.975	0.923	1	1	1	1	1	1	109.7	95.8	101.1	93.3	1.21	1.94	1.96	1.2	High	High	High	High	High	High	High	High	High	High	High	High
FALSE	High	Master Protein	Dlo_alt0010F-019-01.1_g00060.1	Dlo_alt0010F-019-01.1_g00060.1	0	65.846	28	11	42	10	457	49.9	7.64	1089	11	0	1	0.827	1.01	0.652	1.222	0.788	0.645	1	1	1	1	1	1	114.6	94.8	115.8	74.7	2.19	5.29	2.32	2.83	High	High	High	High	High	High	High	High	High	High	High	High
FALSE	High	Master Protein	Dlo_pri1403F.1_g00140.1	Dlo_pri1403F.1_g00140.1	0	96.013	32	15	42	15	661	72.7	7.47	1075	15	0	0	0.974	0.983	1.026	1.009	1.052	1.043	1	1	1	1	1	1	100.4	97.9	98.7	103	1.59	1.12	1.96	1.63	High	High	High	High	High	High	High	High	High	High	High	High
FALSE	High	Master Protein	Dlo_pri0084F.1_g03580.1	Dlo_pri0084F.1_g03580.1	0	85.581	30	17	41	7	677	72.7	8.34	1047	17	0	10	0.814	0.962	0.817	1.182	1.003	0.849	1	1	1	1	1	1	111.3	90.6	107.1	90.9	1.84	2	1.94	3.8	High	High	High	High	High	High	High	High	High	High	High	High
FALSE	High	Master Protein	Dlo_pri0028F.1_g05100.1	Dlo_pri0028F.1_g05100.1	0	49.462	35	8	41	8	239	26.4	7.75	953	8	0	0	0.758	1.099	0.468	1.448	0.618	0.426	1	1	0.287382	1	1	0.15452	120.3	91.2	132.1	56.3	1.32	0.97	0.54	2.39	High	High	High	High	High	High	High	High	High	High	High	High
FALSE	High	Master Protein	Dlo_pri0243F.1_g00440.1	Dlo_pri0243F.1_g00440.1	0	85.972	37	16	41	16	527	57.9	7.15	1027	16	0	0	1.086	0.867	0.992	0.798	0.913	1.143	1	1	1	1	1	1	101.4	110.1	87.9	100.5	1.24	1.22	2.47	0.93	High	High	High	High	High	High	High	High	High	High	High	High
FALSE	High	Master Protein	Dlo_pri0471F.1_g00800.1	Dlo_pri0471F.1_g00800.1	0	60.932	11	6	41	2	614	69.2	5.83	951	6	0	0	0.94	0.941	0.766	1.001	0.814	0.814							109.7	103.1	103.2	84					Not Found	High	Not Found	Not Found	High	Not Found	Not Found	High	Not Found	Not Found	High	Not Found
FALSE	High	Master Protein	Dlo_pri0261F.1_g01390.1	Dlo_pri0261F.1_g01390.1	0	79.26	32	11	41	11	472	51.6	5.68	1065	11	0	0	1.03	0.992	1.02	0.963	0.99	1.028	1	1	1	1	1	1	99	102	98.2	100.9	1.42	1.83	1.75	1.08	High	High	High	High	High	High	High	High	High	High	High	High
FALSE	High	Master Protein	Dlo_alt0029F-004-01.1_g00020.1	Dlo_alt0029F-004-01.1_g00020.1	0	79.668	17	13	41	12	895	101.9	5.11	967	13	0	0	1.636	0.993	1.024	0.607	0.626	1.032	1	1	1	1	1	1	86	140.6	85.3	88.1	2.27	3.12	2.56	3.92	High	High	High	High	High	High	High	High	High	High	High	High
FALSE	High	Master Protein	Dlo_pri0000F.1_g07220.1	Dlo_pri0000F.1_g07220.1	0	57.381	29	10	41	9	417	46.5	8.63	1040	10	0	1	1.71	1.109	1.525	0.648	0.892	1.376	1	1	1	1	1	1	74.9	128	83	114.2	1.7	1.75	2.54	0.91	High	High	High	High	High	High	High	High	High	High	High	High
FALSE	High	Master Protein	Dlo_pri0151F.1_g01100.1	Dlo_pri0151F.1_g01100.1	0	50.563	40	7	41	7	219	22.9	9.23	884	7	0	0	1.548	1.035	1.342	0.668	0.867	1.297	1	1	1	1	1	1	81.2	125.7	84	109	4.32	3.24	1.08	1.61	High	High	High	High	High	High	High	High	High	High	High	High
FALSE	High	Master Protein	Dlo_pri0229F.1_g01740.1	Dlo_pri0229F.1_g01740.1	0	67.09	27	14	41	8	611	67	5.78	981	14	0	6	0.771	0.994	0.883	1.289	1.145	0.889	0.176948	1	1	0.150875	1	1	109.7	84.5	109	96.8	0.61	2.36	0.5	1.7	High	High	High	High	High	High	High	High	High	High	High	High
FALSE	High	Master Protein	Dlo_pri0015F.1_g03450.1	Dlo_pri0015F.1_g03450.1	0	54.304	34	7	41	7	213	23.9	7.09	1022	7	0	0	0.388	1.07	0.378	2.759	0.975	0.354	0.680485	1	0.84521	0.51793	1	0.58326	141.1	54.7	150.9	53.4	0.99	4.41	3.11	4.39	High	High	High	High	High	High	High	High	High	High	High	High
FALSE	High	Master Protein	Dlo_pri0023F.1_g00240.1	Dlo_pri0023F.1_g00240.1	0	85.686	30	12	40	12	557	62.6	6.67	1200	12	0	0	0.98	0.906	1.071	0.924	1.092	1.183	1	1	1	1	1	1	101.1	99.1	91.5	108.3	2.27	1.33	2.98	1.92	High	High	High	High	High	High	High	High	High	High	High	High
FALSE	High	Master Protein	Dlo_pri0063F.1_g03610.1	Dlo_pri0063F.1_g03610.1	0	86.735	33	15	40	14	562	62.9	4.77	1053	15	0	2	1.609	1.086	1.108	0.675	0.689	1.021	1	1	1	1	1	1	83.3	134	90.4	92.3	3.55	2.47	3.26	1.4	High	High	High	High	High	High	High	High	High	High	High	High
FALSE	High	Master Protein	Dlo_pri0056F.1_g01200.1	Dlo_pri0056F.1_g01200.1	0	80.992	20	12	40	1	706	81.2	5.06	1062	12	0	0	0.783	1.149	0.824	1.467	1.053	0.718							106.5	83.4	122.3	87.8					High	Not Found	Not Found	High	Not Found	Not Found	High	Not Found	Not Found	High	Not Found	Not Found
FALSE	High	Master Protein	Dlo_pri0342F.1_g00900.1	Dlo_pri0342F.1_g00900.1	0	53.846	33	8	40	8	258	29.3	10.18	956	8	0	0	1.042	0.877	0.965	0.842	0.926	1.1	1	1	1	1	1	1	103	107.3	90.3	99.4	1.92	1.69	1.91	2.66	High	High	High	High	High	High	High	High	High	High	High	High
FALSE	High	Master Protein	Dlo_pri0033F.1_g01790.1	Dlo_pri0033F.1_g01790.1	0	74.796	24	11	40	10	542	60.4	8.87	1008	11	0	1	0.966	0.943	1.126	0.977	1.166	1.194	1	1	1	1	1	1	99.1	95.7	93.5	111.7	1.39	2.78	1.86	1.89	High	High	High	High	High	High	High	High	High	High	High	High
FALSE	High	Master Protein	Dlo_pri0055F.1_g02130.1	Dlo_pri0055F.1_g02130.1	0	72.961	13	12	40	9	1088	118.4	5.45	1112	12	0	3	0.747	0.926	0.987	1.24	1.323	1.067	1	1	1	1	1	1	109.3	81.6	101.2	107.9	3.74	5.65	2.26	3.89	High	High	High	High	High	High	High	High	High	High	High	High
FALSE	High	Master Protein	Dlo_pri0508F.1_g00950.1	Dlo_pri0508F.1_g00950.1	0	76.845	44	15	40	6	445	49.6	6.33	1176	15	0	9	0.877	1.029	0.941	1.173	1.072	0.914	1	1	1	1	1	1	104	91.2	107	97.8	2.13	0.87	2.83	0.28	High	High	High	High	High	High	High	High	High	High	High	High
FALSE	High	Master Protein	Dlo_pri0002F.1_g02340.1	Dlo_pri0002F.1_g02340.1	0	88.826	51	9	40	2	249	27.2	6.23	1290	9	0	0	1.183	0.891	0.983	0.753	0.831	1.103	1	1	1	1	1	1	98.6	116.7	87.8	96.9	3.33	4.49	1.71	3.69	High	High	High	High	High	High	High	High	High	High	High	High
FALSE	High	Master Protein	Dlo_pri0020F.1_g06540.1	Dlo_pri0020F.1_g06540.1	0	85.736	51	10	40	10	235	25.7	5.69	1104	10	0	0	1.005	1.028	0.959	1.022	0.954	0.933	1	1	1	1	1	1	100.2	100.7	103	96.1	1.29	1.04	1.35	0.99	High	High	High	High	High	High	High	High	High	High	High	High
FALSE	High	Master Protein	Dlo_pri0064F.1_g00100.1	Dlo_pri0064F.1_g00100.1	0	110.477	28	21	40	18	1004	109.9	6.27	979	21	0	3	0.821	0.985	0.949	1.199	1.156	0.964	1	1	1	1	1	1	106.5	87.5	104.9	101.1	2.16	5	2.11	0.79	High	High	High	High	High	High	High	High	High	High	High	High
FALSE	High	Master Protein	Dlo_pri0355F.1_g00260.1	Dlo_pri0355F.1_g00260.1	0	51.672	61	7	40	7	107	11.2	6.61	1246	7	0	0	2.513	1.003	0.92	0.399	0.366	0.917	0.0827262	1	1	0.0638356	0.066345	1	73.6	184.9	73.8	67.7	4.51	4.93	3.53	5.16	High	High	High	High	High	High	High	High	High	High	High	High
FALSE	High	Master Protein	Dlo_pri0361F.1_g00570.1	Dlo_pri0361F.1_g00570.1	0	68.193	26	10	39	4	595	63.7	6.8	1088	10	0	6	0.888	0.971	0.85	1.093	0.957	0.876	1	1	1	1	1	1	107.8	95.8	104.7	91.7	0.53	0.93	1.25	1.99	High	High	High	High	High	High	High	High	High	High	High	High
FALSE	High	Master Protein	Dlo_pri0225F.1_g01740.1	Dlo_pri0225F.1_g01740.1	0	73.932	32	12	39	12	471	52.6	7.12	1102	12	0	0	0.972	1.004	0.935	1.034	0.962	0.931	1	1	1	1	1	1	102.3	99.4	102.7	95.6	1.46	1.46	1.26	1.33	High	High	High	High	High	High	High	High	High	High	High	High
FALSE	High	Master Protein	Dlo_pri0191F.1_g00240.1	Dlo_pri0191F.1_g00240.1	0	77.177	44	5	39	5	262	28	8	1102	5	0	0	1.375	1.424	1.03	1.036	0.749	0.723	1	1	1	1	1	1	82.8	113.9	118	85.3	1.35	3.21	3.85	2.75	High	High	High	High	High	High	High	High	High	High	High	High
FALSE	High	Master Protein	Dlo_pri0053F.1_g02680.1	Dlo_pri0053F.1_g02680.1	0	64.017	63	10	39	10	200	22.4	6.64	1011	10	0	0	1.044	1.094	0.976	1.048	0.935	0.892	1	1	1	1	1	1	97.2	101.5	106.4	94.9	1.33	1.22	2.96	3.47	High	High	High	High	High	High	High	High	High	High	High	High
FALSE	High	Master Protein	Dlo_pri0404F.1_g00420.1	Dlo_pri0404F.1_g00420.1	0	59.33	25	8	39	6	476	52.6	8.59	1187	8	0	2	0.883	1.021	0.983	1.156	1.113	0.963	1	1	1	1	1	1	102.9	90.9	105.1	101.2	1.09	2.14	0.73	1.61	High	High	High	High	High	High	High	High	High	High	High	High
FALSE	High	Master Protein	Dlo_alt0025F-008-01.1_g00080.1	Dlo_alt0025F-008-01.1_g00080.1	0	71.91	20	10	39	10	695	76.9	7.18	1096	10	0	0	0.922	0.873	0.838	0.946	0.909	0.961	1	1	1	1	1	1	110.1	101.6	96.1	92.3	1.85	0.89	0.79	2.03	High	High	High	High	High	High	High	High	High	High	High	High
FALSE	High	Master Protein	Dlo_pri0026F.1_g01940.1	Dlo_pri0026F.1_g01940.1	0	77.851	17	9	39	5	770	81.9	9.04	1198	9	0	5	1.085	1.035	0.899	0.954	0.829	0.868	1	1	1	1	1	1	99.5	108	103	89.5	2.33	1.57	3.34	1.9	High	High	High	High	High	High	High	High	High	High	High	High
FALSE	High	Master Protein	Dlo_pri0064F.1_g03310.1	Dlo_pri0064F.1_g03310.1	0	50.906	33	8	39	1	253	28.7	6.05	924	8	0	0	1.209	1.024	1.004	0.847	0.831	0.981	1	1	1	1	1	1	94.4	114.1	96.6	94.8	0.67	2.34	4.71	5.1	High	High	High	High	High	High	High	High	High	High	High	High
FALSE	High	Master Protein	Dlo_pri0196F.1_g01290.1	Dlo_pri0196F.1_g01290.1	0	96.866	34	13	39	11	479	50	8.94	1265	13	0	0	1.689	0.936	1.313	0.554	0.777	1.402	1	1	1	1	1	1	81	136.8	75.8	106.3	0.82	1.28	1.08	1.01	High	High	High	High	High	High	High	High	High	High	High	High
FALSE	High	Master Protein	Dlo_pri0023F.1_g00130.1	Dlo_pri0023F.1_g00130.1	0	64.81	32	9	39	9	317	35.3	4.93	1278	9	0	0	0.849	1.072	0.644	1.262	0.758	0.601	1	1	1	1	1	1	112.2	95.3	120.2	72.3	0.53	5.11	5.82	3.38	High	High	High	High	High	High	High	High	High	High	High	High
FALSE	High	Master Protein	Dlo_pri0024F.1_g02910.1	Dlo_pri0024F.1_g02910.1	0	68.074	37	10	39	3	392	44.7	6.23	1122	10	0	7	0.898	0.984	1.008	1.095	1.122	1.024	1	1	1	1	1	1	102.8	92.4	101.2	103.6	2.4	7.47	6.83	3.54	High	High	High	High	High	High	High	High	High	High	High	High
FALSE	High	Master Protein	Dlo_alt0042F-011-01.1_g00050.1	Dlo_alt0042F-011-01.1_g00050.1	0	53.827	7	8	39	8	1292	143.8	8.75	903	8	0	0	1.3	0.951	1.033	0.732	0.794	1.085	1	1	1	1	1	1	93.4	121.4	88.8	96.4	1.12	0.58	0.46	0.32	High	High	High	High	High	High	High	High	High	High	High	High
FALSE	High	Master Protein	Dlo_pri0290F.1_g00920.1	Dlo_pri0290F.1_g00920.1	0	92.376	48	7	39	3	286	30.6	8.63	1122	7	0	0	1.427	0.838	1.046	0.587	0.733	1.247	1	1	1	1	1	1	92.8	132.4	77.8	97	9.12	10.61	5.05	7.74	High	High	High	High	High	High	High	High	High	High	High	High
FALSE	High	Master Protein	Dlo_pri0001F.1_g06200.1	Dlo_pri0001F.1_g06200.1	0	77.269	26	9	39	9	476	52.7	6.34	1101	9	0	0	0.91	0.989	0.949	1.087	1.043	0.96	1	1	1	1	1	1	103.9	94.6	102.8	98.7	0.92	1	1.37	0.92	High	High	High	High	High	High	High	High	High	High	High	High
FALSE	High	Master Protein	Dlo_pri0030F.1_g03040.1	Dlo_pri0030F.1_g03040.1	0	53.667	57	9	39	9	168	19.7	5.19	814	9	0	0	0.944	0.871	0.886	0.922	0.939	1.018	1	1	1	1	1	1	108.1	102	94.1	95.8	0.55	0.52	0.69	0.49	High	High	High	High	High	High	High	High	High	High	High	High
FALSE	High	Master Protein	Dlo_pri0134F.1_g02000.1	Dlo_pri0134F.1_g02000.1	0	82.442	37	10	39	9	411	43.4	8.51	1179	10	0	0	1.152	0.968	1.124	0.84	0.976	1.162	1	1	1	1	1	1	94.2	108.6	91.2	106	0.52	1.91	2.61	1.02	High	High	High	High	High	High	High	High	High	High	High	High
FALSE	High	Master Protein	Dlo_pri0024F.1_g01380.1	Dlo_pri0024F.1_g01380.1	0	69.096	12	7	38	7	782	86	6.34	1014	7	0	0	0.814	0.934	0.759	1.146	0.932	0.813	1	1	1	1	1	1	114.1	92.9	106.5	86.5	0.81	1.82	2.28	1.04	High	High	High	High	High	High	High	High	High	High	High	High
FALSE	High	Master Protein	Dlo_pri0198F.1_g00200.1	Dlo_pri0198F.1_g00200.1	0	68.983	53	12	38	2	247	27.8	6.55	830	12	0	0	1.232	1.2	2.021	0.974	1.641	1.684	1	1	1	1	1	1	73.4	90.3	88	148.3	2.98	8.8	1.39	4.19	High	High	High	High	High	High	High	High	High	High	High	High
FALSE	High	Master Protein	Dlo_pri0066F.1_g01710.1	Dlo_pri0066F.1_g01710.1	0	56.357	24	5	38	5	379	40.9	4.98	812	5	0	0	0.292	0.793	1.379	2.718	4.725	1.738	0.00280952	1	1	0.00638909	0.00161941	0.163956	115.5	33.7	91.6	159.2	1.37	14.24	1.52	2.46	High	High	High	High	High	High	High	High	High	High	High	High
FALSE	High	Master Protein	Dlo_pri0079F.1_g04260.1	Dlo_pri0079F.1_g04260.1	0	73.077	29	12	38	1	566	63.8	5.41	1043	12	0	0	0.82	0.976	0.896	1.191	1.092	0.917	1	1	1	1	1	1	108.3	88.8	105.8	97.1	4.96	3.57	5.33	3.28	High	High	High	High	High	High	High	High	High	High	High	High
FALSE	High	Master Protein	Dlo_pri0292F.1_g00990.1	Dlo_pri0292F.1_g00990.1	0	55.32	43	8	38	8	232	25.6	6.67	1034	8	0	0	2.043	0.905	1.493	0.443	0.731	1.648	0.0430237	1	0.436068	0.0130131	1	0.149475	73.5	150.2	66.6	109.7	0.86	1.26	2.03	0.37	High	High	High	High	High	High	High	High	High	High	High	High
FALSE	High	Master Protein	Dlo_pri0132F.1_g02700.1	Dlo_pri0132F.1_g02700.1	0	66.279	33	7	38	2	392	44.7	6.07	1188	7	0	7	0.442	1.031	0.898	2.331	2.032	0.872	0.150834	1	1	0.0980804	0.304251	1	118.7	52.5	122.3	106.6	0.7	4	2.18	1.25	High	High	High	High	High	High	High	High	High	High	High	High
FALSE	High	Master Protein	Dlo_pri0335F.1_g00520.1	Dlo_pri0335F.1_g00520.1	0	74.129	37	10	38	3	274	30	10.18	1024	10	0	0	1.118	0.931	1.032	0.833	0.923	1.109	1	1	1	1	1	1	98	109.6	91.2	101.2	0.36	2.16	1.78	1.11	High	High	High	High	High	High	High	High	High	High	High	High
FALSE	High	Master Protein	Dlo_pri0182F.1_g01080.1	Dlo_pri0182F.1_g01080.1	0	64.761	25	12	38	12	527	57.5	6.95	825	12	0	0	1.034	1.045	0.918	1.011	0.888	0.878	1	1	1	1	1	1	100.1	103.4	104.6	91.9	0.65	2.53	1.52	1.43	High	High	High	High	High	High	High	High	High	High	High	High
FALSE	High	Master Protein	Dlo_pri0050F.1_g01790.1	Dlo_pri0050F.1_g01790.1	0	97.484	35	18	38	16	711	78.4	5.01	979	18	0	3	1.085	1.087	1.036	1.001	0.955	0.953	1	1	1	1	1	1	95	103.2	103.3	98.5	2.38	1.85	1.45	0.96	High	High	High	High	High	High	High	High	High	High	High	High
FALSE	High	Master Protein	Dlo_pri0092F.1_g02770.1	Dlo_pri0092F.1_g02770.1	0	79.625	32	14	38	14	544	58.7	5.71	901	14	0	0	0.986	1.158	0.982	1.174	0.996	0.848	1	1	1	1	1	1	96.9	95.6	112.2	95.2	0.83	0.61	0.84	0.91	High	High	High	High	High	High	High	High	High	High	High	High
FALSE	High	Master Protein	Dlo_pri0103F.1_g00910.1	Dlo_pri0103F.1_g00910.1	0	73.169	31	5	38	1	288	30.9	8.63	1232	5	0	0	0.924	1.391	1.115	1.506	1.208	0.802	1	1	1	1	1	1	90.3	83.4	125.6	100.7	3.9	12.77	4.17	6.43	High	High	High	High	High	High	High	High	High	High	High	High
FALSE	High	Master Protein	Dlo_pri0186F.1_g02460.1	Dlo_pri0186F.1_g02460.1	0	97.589	20	14	38	14	885	99.6	5.48	1067	14	0	0	1.154	1.088	1.148	0.943	0.995	1.056	1	1	1	1	1	1	91.1	105.1	99.1	104.6	1.72	0.77	2.36	1.85	High	High	High	High	High	High	High	High	High	High	High	High
FALSE	High	Master Protein	Dlo_pri0151F.1_g00620.1	Dlo_pri0151F.1_g00620.1	0	83.547	44	12	38	3	393	43.1	5.91	1224	12	0	10	0.484	0.681	0.797	1.407	1.648	1.171	1	1	1	1	1	1	135.1	65.3	91.9	107.6	2.35	7.53	0.55	1.81	High	High	High	High	High	High	High	High	High	High	High	High
FALSE	High	Master Protein	Dlo_pri0025F.1_g04050.1	Dlo_pri0025F.1_g04050.1	0	85.414	60	10	37	3	249	27.3	7.12	1069	10	0	9	1.084	1.054	0.933	0.973	0.86	0.885	1	1	1	1	1	1	98.3	106.5	103.6	91.6	1.41	1.98	2.55	1.45	High	High	Not Found	High	High	Not Found	High	High	Not Found	High	High	Not Found
FALSE	High	Master Protein	Dlo_pri0267F.1_g00470.1	Dlo_pri0267F.1_g00470.1	0	71.412	25	6	37	6	357	39	8.27	946	6	0	0	1.005	0.947	1.507	0.942	1.499	1.592	1	1	1	1	1	1	89.7	90.2	84.9	135.2	1.97	2.19	1.6	2.38	High	High	High	High	High	High	High	High	High	High	High	High
FALSE	High	Master Protein	Dlo_pri0248F.1_g01760.1	Dlo_pri0248F.1_g01760.1	0	61.813	50	5	37	2	151	15.8	8.18	876	5	0	0	1.059	0.834	0.924	0.788	0.872	1.107	1	1	1	1	1	1	104.8	111	87.4	96.8	2.05	1.1	1.43	0.17	High	High	High	High	High	High	High	High	High	High	High	High
FALSE	High	Master Protein	Dlo_pri0347F.1_g00230.1	Dlo_pri0347F.1_g00230.1	0	49.38	38	9	37	4	325	34.4	5.22	1088	9	0	0	1.08	0.966	0.945	0.894	0.875	0.979	1	1	1	1	1	1	100.2	108.3	96.8	94.7	1.33	1.49	3.15	4.3	High	High	High	High	High	High	High	High	High	High	High	High
FALSE	High	Master Protein	Dlo_pri0361F.1_g00530.1	Dlo_pri0361F.1_g00530.1	0	62.705	26	9	37	3	521	56.8	6.33	1051	9	0	0	0.789	0.924	0.823	1.171	1.042	0.89	1	1	1	1	1	1	113.1	89.3	104.6	93	6.62	4.05	3.66	8.61	High	High	High	High	High	High	High	High	High	High	High	High
FALSE	High	Master Protein	Dlo_pri0106F.1_g00380.1	Dlo_pri0106F.1_g00380.1	0	69.154	24	18	37	15	846	95.9	6.96	813	18	0	3	0.834	0.93	0.791	1.115	0.949	0.851	1	1	1	1	1	1	112.5	93.8	104.6	89	2.16	2.42	2.79	3.15	High	High	High	High	High	High	High	High	High	High	High	High
FALSE	High	Master Protein	Dlo_pri0053F.1_g02090.1	Dlo_pri0053F.1_g02090.1	0	69.162	29	12	37	2	472	53.3	6.98	878	12	0	10	1.312	1.021	1.628	0.778	1.241	1.595	1	1	1	1	1	1	80.6	105.8	82.3	131.3	3.57	1.02	3.07	3.68	High	High	High	High	High	High	High	High	High	High	High	High
FALSE	High	Master Protein	Dlo_pri0455F.1_g00430.1	Dlo_pri0455F.1_g00430.1	0	65.76	34	10	37	10	343	39.1	5.94	960	10	0	0	1.011	0.8	0.874	0.791	0.864	1.092	1	1	1	1	1	1	108.5	109.8	86.9	94.8	0.17	1.09	3.06	2.65	High	High	High	High	High	High	High	High	High	High	High	High
FALSE	High	Master Protein	Dlo_pri0079F.1_g04270.1	Dlo_pri0079F.1_g04270.1	0	81.815	31	13	37	2	574	64.8	5.34	989	13	0	12	0.626	0.858	0.782	1.37	1.249	0.911	0.318465	1	1	1	1	1	122.5	76.7	105.1	95.7	1.23	3.15	2.71	1.08	High	High	High	High	High	High	High	High	High	High	High	High
FALSE	High	Master Protein	Dlo_pri0686F.1_g00160.1	Dlo_pri0686F.1_g00160.1	0	86.085	25	12	37	11	628	71.6	9	932	12	0	0	0.992	1.029	0.918	1.038	0.926	0.892	1	1	1	1	1	1	101.5	100.7	104.5	93.3	1.43	1.74	1.59	1.28	High	High	High	High	High	High	High	High	High	High	High	High
FALSE	High	Master Protein	Dlo_pri0235F.1_g01200.1	Dlo_pri0235F.1_g01200.1	0	66.04	15	11	36	5	997	108.1	5.54	1010	11	0	6	0.973	0.993	1.046	1.02	1.075	1.054	1	1	1	1	1	1	99.7	97	99	104.3	1.13	2.94	1.57	2.52	High	High	High	High	High	High	High	High	High	High	High	High
FALSE	High	Master Protein	Dlo_pri0620F.1_g00490.1	Dlo_pri0620F.1_g00490.1	0	65.878	30	7	36	7	404	44.7	6.4	1070	7	0	0	0.863	0.976	0.94	1.132	1.09	0.963	1	1	1	1	1	1	105.8	91.3	103.3	99.5	1.15	0.58	0.97	2.39	High	High	High	High	High	High	High	High	High	High	High	High
FALSE	High	Master Protein	Dlo_alt0066F-013-01.1_g00010.1	Dlo_alt0066F-013-01.1_g00010.1	0	59.817	16	9	36	4	660	71.9	7.49	848	9	0	0	0.956	1.08	0.982	1.13	1.027	0.909	1	1	1	1	1	1	99.6	95.2	107.5	97.7	1.51	0.78	7.1	9.44	High	High	High	High	High	High	High	High	High	High	High	High
FALSE	High	Master Protein	Dlo_pri0193F.1_g01110.1	Dlo_pri0193F.1_g01110.1	0	73.999	26	12	35	5	601	68.5	8.24	981	12	0	7	0.731	0.911	1.053	1.245	1.44	1.157	1	1	1	1	1	1	108.2	79.2	98.6	114	1.72	6.01	4.82	0.59	High	High	High	High	High	High	High	High	High	High	High	High
FALSE	High	Master Protein	Dlo_pri0000F.1_g05370.1	Dlo_pri0000F.1_g05370.1	0	80.512	32	12	35	12	535	59	6.49	1119	12	0	0	0.921	1.133	0.918	1.23	0.997	0.81	1	1	1	1	1	1	100.7	92.8	114.1	92.4	6.5	6.73	1.13	2.15	High	High	High	High	High	High	High	High	High	High	High	High
FALSE	High	Master Protein	Dlo_pri0046F.1_g03280.1	Dlo_pri0046F.1_g03280.1	0	52.47	23	11	35	11	495	53.9	6.06	835	11	0	0	1.065	1.007	0.942	0.946	0.884	0.935	0.846394	1	1	1	0.0914342	0.707976	99.7	106.1	100.4	93.8	1.1	1.46	1.02	0.76	High	High	High	High	High	High	High	High	High	High	High	High
FALSE	High	Master Protein	Dlo_pri1131F.1_g00200.1	Dlo_pri1131F.1_g00200.1	0	69.038	31	9	35	9	418	43.7	6.62	1055	9	0	0	0.916	1.189	1.172	1.298	1.279	0.985	1	1	1	1	1	1	93.5	85.7	111.2	109.6	0.71	5.56	4.7	0.85	High	High	High	High	High	High	High	High	High	High	High	High
FALSE	High	Master Protein	Dlo_pri0022F.1_g02950.1	Dlo_pri0022F.1_g02950.1	0	82.866	25	7	35	7	520	55.5	8.92	1014	7	0	0	1.076	1.018	1.034	0.946	0.961	1.016	1	1	1	1	1	1	96.9	104.2	98.6	100.2	1.18	1.26	1.88	1.76	High	High	High	High	High	High	High	High	High	High	High	High
FALSE	High	Master Protein	Dlo_pri0024F.1_g03040.1	Dlo_pri0024F.1_g03040.1	0	48.598	27	8	35	1	392	44.9	6.06	933	8	0	0	0.452	1.087	0.618	2.403	1.366	0.569	1	1	1	1	1	1	126.7	57.3	137.7	78.3	5.35	17.18	2.7	0.17	High	High	High	High	High	High	High	High	High	High	High	High
FALSE	High	Master Protein	Dlo_alt0261F-004-01.1_g00020.1	Dlo_alt0261F-004-01.1_g00020.1	0	31.269	32	4	35	4	198	20.7	4.02	586	4	0	0	1.192	0.889	0.906	0.746	0.76	1.019	1	1	1	1	1	1	100.3	119.6	89.2	90.9	1.05	1.02	0.78	0.59	High	High	High	High	High	High	High	High	High	High	High	High
FALSE	High	Master Protein	Dlo_pri0030F.1_g01530.1	Dlo_pri0030F.1_g01530.1	0	66.165	22	13	35	13	708	78.7	7.61	1047	13	0	0	0.811	1.185	0.808	1.461	0.997	0.682	1	1	1	1	1	1	105.2	85.3	124.6	85	1.24	2.47	1.58	1.38	High	High	High	High	High	High	High	High	High	High	High	High
FALSE	High	Master Protein	Dlo_pri0004F.1_g05480.1	Dlo_pri0004F.1_g05480.1	0	97.702	25	13	35	13	779	84.1	8.56	997	13	0	0	1.694	1.343	1.366	0.793	0.806	1.017	0.212273	1	1	1	1	1	74	125.4	99.4	101.1	4.17	3.69	5.12	2.96	High	High	High	High	High	High	High	High	High	High	High	High
FALSE	High	Master Protein	Dlo_pri1141F.1_g00160.1	Dlo_pri1141F.1_g00160.1	0	58.322	19	8	35	8	475	52.7	6.48	849	8	0	0	0.992	0.483	0.596	0.486	0.6	1.234	1	0.137968	0.284996	0.051332	0.354438	1	130.3	129.2	62.9	77.6	1.14	0.17	2.24	0.88	High	High	High	High	High	High	High	High	High	High	High	High
FALSE	High	Master Protein	Dlo_pri0047F.1_g03450.1	Dlo_pri0047F.1_g03450.1	0	34.598	21	4	35	4	222	24.6	4.87	782	4	0	0	0.853	1.024	0.709	1.2	0.831	0.692	1	1	1	1	1	0.728651	111.6	95.1	114.2	79.1	2.66	2.4	4	0.66	High	High	High	High	High	High	High	High	High	High	High	High
FALSE	High	Master Protein	Dlo_pri0041F.1_g01840.1	Dlo_pri0041F.1_g01840.1	0	41.802	41	8	35	2	249	28.6	5.16	884	8	0	1	1.075	0.978	0.873	0.91	0.813	0.893	1	1	1	1	1	1	101.9	109.5	99.6	89	3.89	3.33	3.53	3.06	High	High	High	High	High	High	High	High	High	High	High	High
FALSE	High	Master Protein	Dlo_pri0304F.1_g00150.1	Dlo_pri0304F.1_g00150.1	0	51.888	25	8	35	3	371	40.2	7.53	944	8	0	6	0.773	0.755	0.778	0.977	1.006	1.03	1	1	1	1	1	1	121	93.5	91.4	94.1	2.07	2.01	2.74	2.48	High	High	High	High	High	High	High	High	High	High	High	High
FALSE	High	Master Protein	Dlo_pri0141F.1_g01360.1	Dlo_pri0141F.1_g01360.1	0	52.328	11	5	35	4	462	50.6	5.25	1101	5	0	1	1.166	1.211	1.243	1.038	1.066	1.026	1	1	1	1	1	1	86.6	101	104.8	107.6	1.58	2.42	0.76	1.27	High	High	High	High	High	High	High	High	High	High	High	High
FALSE	High	Master Protein	Dlo_pri0250F.1_g01580.1	Dlo_pri0250F.1_g01580.1	0	46.654	15	11	35	11	707	78.9	7.93	649	11	0	0	0.768	1.171	0.87	1.524	1.133	0.743	1	1	1	1	1	1	105	80.7	123	91.4	1.32	4.58	1.74	0.77	High	High	High	High	High	High	High	High	High	High	High	High
FALSE	High	Master Protein	Dlo_pri0016F.1_g03760.1	Dlo_pri0016F.1_g03760.1	0	29.163	30	5	35	2	172	18.1	9.25	625	5	0	4	0.902	0.86	0.836	0.953	0.928	0.973	1	1	1	1	1	1	111.2	100.2	95.6	93	0.61	0.45	0.71	1.09	High	High	High	High	High	High	High	High	High	High	High	High
FALSE	High	Master Protein	Dlo_pri0001F.1_g06240.1	Dlo_pri0001F.1_g06240.1	0	78.506	39	14	35	5	480	53.1	7.03	1076	14	0	9	0.542	0.573	0.732	1.056	1.349	1.278	0.256981	0.757567	1	1	1	1	140.5	76.2	80.4	102.8	1.23	3.61	1.6	1.89	High	High	High	High	High	High	High	High	High	High	High	High
FALSE	High	Master Protein	Dlo_pri0383F.1_g00550.1	Dlo_pri0383F.1_g00550.1	0	93.533	24	16	34	16	867	99.2	6.68	748	16	0	0	0.89	1.016	0.995	1.142	1.118	0.979	1	1	1	1	1	1	102.5	91.2	104.2	102	2.68	6.31	8.51	5.4	High	High	High	High	High	High	High	High	High	High	High	High
FALSE	High	Master Protein	Dlo_pri0023F.1_g04220.1	Dlo_pri0023F.1_g04220.1	0	63.46	32	11	34	11	395	43.6	7.71	955	11	0	0	1.12	0.921	0.894	0.823	0.798	0.97	1	1	1	1	1	1	101.6	113.8	93.7	90.9	0.53	1.71	1.35	0.57	High	High	High	High	High	High	High	High	High	High	High	High
FALSE	High	Master Protein	Dlo_pri0320F.1_g00430.1	Dlo_pri0320F.1_g00430.1	0	74.746	40	12	34	12	379	42.3	8	974	12	0	0	0.936	1.057	0.943	1.129	1.008	0.893	1	1	1	1	1	1	101.6	95.1	107.4	95.9	1.06	0.46	0.72	1.76	High	High	High	High	High	High	High	High	High	High	High	High
FALSE	High	Master Protein	Dlo_pri0503F.1_g00620.1	Dlo_pri0503F.1_g00620.1	0	94.983	57	8	34	5	286	30.5	8.63	961	8	0	0	1.804	0.893	1.025	0.495	0.568	1.148	1	1	1	1	1	1	84.7	152.8	75.6	86.9	9.77	5.61	15.14	4.6	High	High	High	High	High	High	High	High	High	High	High	High
FALSE	High	Master Protein	Dlo_pri0115F.1_g00140.1	Dlo_pri0115F.1_g00140.1	0	43.563	60	6	34	6	110	12.1	6.55	1006	6	0	0	1.061	1.099	0.823	1.035	0.775	0.749	1	1	1	1	1	1	100.4	106.6	110.4	82.6	0.4	0.93	0.56	1.28	High	High	High	High	High	High	High	High	High	High	High	High
FALSE	High	Master Protein	Dlo_pri0010F.1_g04110.1	Dlo_pri0010F.1_g04110.1	0	85.365	46	15	34	14	419	47.1	8.87	828	15	0	1	0.86	1.014	0.883	1.178	1.027	0.871	1	1	1	1	1	1	106.5	91.6	107.9	94	0.26	1.93	0.82	1.23	High	High	High	High	High	High	High	High	High	High	High	High
FALSE	High	Master Protein	Dlo_pri0174F.1_g01660.1	Dlo_pri0174F.1_g01660.1	0	47.552	53	8	34	8	204	21.8	6.95	957	8	0	0	0.901	0.914	1.159	1.015	1.287	1.268	1	1	1	1	1	1	100.6	90.7	92	116.7	0.15	0.1	2.12	1.76	High	High	High	High	High	High	High	High	High	High	High	High
FALSE	High	Master Protein	Dlo_alt0439F-004-01.1_g00020.1	Dlo_alt0439F-004-01.1_g00020.1	0	52.604	27	8	34	2	379	42.7	9.96	880	8	0	7	1.012	0.991	1.008	0.979	0.996	1.017	1	1	1	1	1	1	99.7	100.9	98.8	100.5	0.55	8.24	8.04	1.19	High	High	High	High	High	High	High	High	High	High	High	High
FALSE	High	Master Protein	Dlo_pri0040F.1_g00990.1	Dlo_pri0040F.1_g00990.1	0	47.813	22	10	34	10	593	64.8	6.76	708	10	0	0	0.995	1.006	0.968	1.011	0.973	0.962	1	1	1	1	1	1	100.8	100.3	101.4	97.6	0.27	1.43	1.21	3.02	High	High	High	High	High	High	High	High	High	High	High	High
FALSE	High	Master Protein	Dlo_pri0925F.1_g00150.1	Dlo_pri0925F.1_g00150.1	0	77.116	30	13	34	13	556	61.9	6.38	908	13	0	0	1.989	1.15	1.298	0.578	0.653	1.129	0.656531	1	1	1	1	1	73.6	146.3	84.6	95.5	3.22	2.04	1.62	1.37	High	High	High	High	High	High	High	High	High	High	High	High
FALSE	High	Master Protein	Dlo_pri0355F.1_g00270.1	Dlo_pri0355F.1_g00270.1	0	41.109	21	9	34	5	486	54.5	8.1	895	9	0	0	1.009	0.995	0.924	0.987	0.917	0.929	1	1	1	1	1	1	101.8	102.7	101.3	94.1	1.64	4.85	7.21	2.47	High	High	High	High	High	High	High	High	High	High	High	High
FALSE	High	Master Protein	Dlo_pri0538F.1_g00430.1	Dlo_pri0538F.1_g00430.1	0	65.154	36	9	34	4	300	33	7.47	894	9	0	0	1.101	1.079	1.096	0.98	0.996	1.016	1	1	1	1	1	1	93.5	103	100.9	102.5	2.27	2.3	0.57	2.47	High	High	High	High	High	High	High	High	High	High	High	High
FALSE	High	Master Protein	Dlo_pri0462F.1_g00620.1	Dlo_pri0462F.1_g00620.1	0	40.783	51	6	33	1	166	17.8	8.92	834	6	0	0	1.095	1.025	1.027	0.935	0.938	1.002	1	1	1	1	1	1	96.4	105.6	98.8	99.1	2.79	6.58	4.43	3.87	High	High	High	High	High	High	High	High	High	High	High	High
FALSE	High	Master Protein	Dlo_pri0001F.1_g02330.1	Dlo_pri0001F.1_g02330.1	0	97.918	19	19	33	14	1198	133.5	6.62	831	19	0	5	1.116	0.967	1.018	0.867	0.913	1.053	1	1	1	1	1	1	97.5	108.8	94.3	99.3	0.92	3.43	2.22	4.14	High	High	High	High	High	High	High	High	High	High	High	High
FALSE	High	Master Protein	Dlo_pri0435F.1_g00080.1	Dlo_pri0435F.1_g00080.1	0	74.132	27	10	33	10	578	64.6	6.98	1120	10	0	0	1.067	1.011	1.062	0.947	0.995	1.051	1	1	1	1	1	1	96.6	103.1	97.7	102.6	2.54	0.96	1.59	0.88	High	High	High	High	High	High	High	High	High	High	High	High
FALSE	High	Master Protein	Dlo_pri0035F.1_g00800.1	Dlo_pri0035F.1_g00800.1	0	81.739	42	16	33	11	506	55.9	8.06	800	16	0	0	0.949	1.028	0.893	1.083	0.94	0.869	1	1	1	1	1	1	103.4	98.1	106.2	92.3	1.94	2.8	1.48	1.89	High	High	High	High	High	High	High	High	High	High	High	High
FALSE	High	Master Protein	Dlo_pri0009F.1_g01770.1	Dlo_pri0009F.1_g01770.1	0	59.468	27	9	33	8	372	42.6	8.73	805	9	0	1	0.743	1.094	1.123	1.472	1.51	1.026	0.851172	1	1	0.388635	0.443873	1	101	75.1	110.5	113.4	0.67	4.62	1.93	1.97	High	High	High	High	High	High	High	High	High	High	High	High
FALSE	High	Master Protein	Dlo_pri0308F.1_g00010.1	Dlo_pri0308F.1_g00010.1	0	60.214	30	8	33	8	361	39.5	6.54	885	8	0	0	0.71	0.905	0.982	1.275	1.383	1.085	1	1	1	1	1	1	111.2	79	100.7	109.2	0.69	2.27	2.31	0.45	High	High	High	High	High	High	High	High	High	High	High	High
FALSE	High	Master Protein	Dlo_pri0262F.1_g01410.1	Dlo_pri0262F.1_g01410.1	0	75.927	26	14	33	14	694	76.7	7.83	906	14	0	0	1.108	0.99	0.978	0.894	0.883	0.988	1	1	1	1	1	1	98.1	108.7	97.2	96	2.57	2.35	0.74	0.89	High	High	High	High	High	High	High	High	High	High	High	High
FALSE	High	Master Protein	Dlo_alt0240F-005-01.1_g00090.1	Dlo_alt0240F-005-01.1_g00090.1	0	77.49	21	17	33	5	982	107.9	6.23	722	17	0	2	1.448	1.14	1.524	0.787	1.052	1.337	1	1	1	1	1	1	78.2	113.3	89.2	119.2	1.27	10.77	9.88	6.03	High	High	Not Found	High	High	Not Found	High	High	Not Found	High	High	Not Found
FALSE	High	Master Protein	Dlo_pri0001F.1_g11540.1	Dlo_pri0001F.1_g11540.1	0	58.019	26	10	33	10	441	48.7	7.24	777	10	0	0	0.83	0.938	0.858	1.131	1.034	0.914	1	1	1	1	1	1	110.3	91.5	103.5	94.6	1.39	2.53	2.1	1.78	High	High	High	High	High	High	High	High	High	High	High	High
FALSE	High	Master Protein	Dlo_pri0016F.1_g04790.1	Dlo_pri0016F.1_g04790.1	0	71.143	21	13	33	13	749	84.6	5.99	872	13	0	0	1.269	0.994	1.122	0.783	0.884	1.129	1	1	1	1	1	1	91.2	115.8	90.7	102.4	3.55	3.16	2.58	0.43	High	High	High	High	High	High	High	High	High	High	High	High
FALSE	High	Master Protein	Dlo_pri0150F.1_g00350.1	Dlo_pri0150F.1_g00350.1	0	66.373	39	10	33	5	327	36.2	7.44	927	10	0	5	0.975	0.914	0.947	0.937	0.972	1.037	1	1	1	1	1	1	104.3	101.6	95.3	98.8	0.86	2.05	0.61	1.25	High	High	High	High	High	High	High	High	High	High	High	High
FALSE	High	Master Protein	Dlo_pri0267F.1_g01460.1	Dlo_pri0267F.1_g01460.1	0	74.888	35	14	33	11	544	60	5.81	826	14	0	3	1.105	0.893	1.102	0.808	0.997	1.235	1	1	1	1	1	1	97.6	107.8	87.1	107.5	1.03	0.44	2.01	0.72	High	High	High	High	High	High	High	High	High	High	High	High
FALSE	High	Master Protein	Dlo_pri0060F.1_g03760.1	Dlo_pri0060F.1_g03760.1	0	42.884	26	8	33	7	302	31.6	9.29	942	8	0	1	0.822	1.116	0.97	1.358	1.18	0.869	1	1	1	1	1	1	102.4	84.1	114.2	99.3	8.36	2.76	4.3	2.66	High	High	High	High	High	High	High	High	High	High	High	High
FALSE	High	Master Protein	Dlo_pri0143F.1_g00470.1	Dlo_pri0143F.1_g00470.1	0	84.232	48	15	33	14	423	47.5	5.11	888	15	0	0	1.036	1.014	0.914	0.979	0.883	0.902	1	1	1	1	1	1	100.9	104.5	102.3	92.3	4.77	3.98	4.78	2.76	High	High	High	High	High	High	High	High	High	High	High	High
FALSE	High	Master Protein	Dlo_pri0025F.1_g02210.1	Dlo_pri0025F.1_g02210.1	0	67.948	26	9	33	9	435	49.9	9.69	881	9	0	0	0.569	0.727	1.164	1.278	2.045	1.601	0.140684	1	1	1	0.066345	0.234094	115.6	65.8	84.1	134.6	1.95	4.83	2.39	1.72	High	High	High	High	High	High	High	High	High	High	High	High
FALSE	High	Master Protein	Dlo_pri0017F.1_g05800.1	Dlo_pri0017F.1_g05800.1	0	85.585	35	13	33	4	480	53	6.29	923	13	0	1	0.712	0.745	0.937	1.047	1.316	1.257	1	1	1	1	1	1	117.9	83.9	87.8	110.4	2.16	0.87	1.69	1.79	High	High	High	High	High	High	High	High	High	High	High	High
FALSE	High	Master Protein	Dlo_pri0038F.1_g02650.1	Dlo_pri0038F.1_g02650.1	0	92.676	30	11	33	2	496	54.3	8.09	914	11	0	9	0.875	0.925	0.816	1.057	0.933	0.882	1	1	1	1	1	1	110.6	96.8	102.3	90.3	1.99	1.5	0.84	0.34	High	High	High	High	High	High	High	High	High	High	High	High
FALSE	High	Master Protein	Dlo_pri0183F.1_g00430.1	Dlo_pri0183F.1_g00430.1	0	49.681	43	8	33	8	251	27	7.08	948	8	0	0	0.833	0.879	1.09	1.055	1.309	1.24	1	1	1	1	0.653763	0.79456	105.2	87.6	92.5	114.7	1.33	3.49	2.48	0.94	High	High	High	High	High	High	High	High	High	High	High	High
FALSE	High	Master Protein	Dlo_pri0084F.1_g01740.1	Dlo_pri0084F.1_g01740.1	0	56.137	18	11	32	8	706	75.2	5.44	699	11	0	3	1.093	1.305	1.118	1.194	1.023	0.856	1	1	1	1	1	1	88.6	96.8	115.6	99	2.08	2.71	1.72	0.44	High	High	High	High	High	High	High	High	High	High	High	High
FALSE	High	Master Protein	Dlo_pri0288F.1_g00920.1	Dlo_pri0288F.1_g00920.1	0	64.224	20	11	32	5	586	65.1	8.4	847	11	0	6	0.996	0.956	0.936	0.96	0.94	0.979	1	1	1	1	1	1	102.9	102.5	98.4	96.3	1.48	3.48	2.77	1.52	High	High	High	High	High	High	High	High	High	High	High	High
FALSE	High	Master Protein	Dlo_pri0064F.1_g03610.1	Dlo_pri0064F.1_g03610.1	0	53.796	30	8	32	5	315	36.4	9.83	881	8	0	4	1.089	0.938	1.039	0.862	0.954	1.107	1	1	1	1	1	1	98.4	107.1	92.3	102.2	1.31	4.25	2.16	1.53	High	High	High	High	High	High	High	High	High	High	High	High
FALSE	High	Master Protein	Dlo_pri0274F.1_g01350.1	Dlo_pri0274F.1_g01350.1	0	47.38	30	9	32	7	356	39.1	6.46	706	9	0	0	0.942	0.993	0.931	1.054	0.988	0.938	1	1	1	1	1	1	103.5	97.5	102.7	96.3	2.66	3	2.21	1.89	High	High	High	High	High	High	High	High	High	High	High	High
FALSE	High	Master Protein	Dlo_pri0025F.1_g02010.1	Dlo_pri0025F.1_g02010.1	0	51.037	42	12	32	11	363	39.9	9.61	638	12	0	1	0.948	0.913	0.899	0.963	0.948	0.985	1	1	1	1	1	1	106.4	100.8	97.1	95.6	4.34	4.8	3.15	2.12	High	High	High	High	High	High	High	High	High	High	High	High
FALSE	High	Master Protein	Dlo_pri0038F.1_g04940.1	Dlo_pri0038F.1_g04940.1	0	58.126	45	10	32	1	271	30.2	6.29	1019	10	0	0	0.727	1.029	0.903	1.416	1.242	0.877	1	1	1	1	1	1	109.3	79.4	112.5	98.7	6.61	1.89	2.3	3.19	High	Not Found	High	High	Not Found	High	High	Not Found	High	High	Not Found	High
FALSE	High	Master Protein	Dlo_pri0132F.1_g02720.1	Dlo_pri0132F.1_g02720.1	0	57.054	26	5	32	1	240	27.7	5.96	1068	5	0	0	0.455	1.097	0.949	2.412	2.085	0.865	1	1	1	1	1	1	114.2	52	125.4	108.4	1.09	9.85	3.53	2.03	High	High	High	High	High	High	High	High	High	High	High	High
FALSE	High	Master Protein	Dlo_pri0072F.1_g02190.1	Dlo_pri0072F.1_g02190.1	0	60.809	36	11	32	11	388	42.3	6.68	718	11	0	0	0.982	1.072	0.934	1.091	0.95	0.871	1	1	1	1	1	1	100.3	98.5	107.5	93.7	2.47	3.17	2.31	1.65	High	High	High	High	High	High	High	High	High	High	High	High
FALSE	High	Master Protein	Dlo_pri0050F.1_g04600.1	Dlo_pri0050F.1_g04600.1	0	58.706	21	11	32	4	685	76.4	6.76	657	11	0	0	0.887	0.88	0.905	0.992	1.021	1.029	1	1	1	1	1	1	108.9	96.6	95.9	98.6	6.88	12.59	8.26	13.23	High	High	High	High	High	High	High	High	High	High	High	High
FALSE	High	Master Protein	Dlo_pri0028F.1_g04710.1	Dlo_pri0028F.1_g04710.1	0	67.394	20	12	32	6	871	96.3	4.78	1056	12	0	0	0.916	0.963	0.923	1.05	1.007	0.959	1	1	1	1	1	1	105.2	96.4	101.3	97.1	3.34	8.11	3.22	1.67	High	High	High	High	High	High	High	High	High	High	High	High
FALSE	High	Master Protein	Dlo_pri0151F.1_g00880.1	Dlo_pri0151F.1_g00880.1	0	45.62	14	6	32	5	537	59.4	6.96	754	6	0	1	1.584	1.393	1.505	0.879	0.95	1.08	0.302942	1	0.514102	1	1	1	73	115.6	101.6	109.8	0.56	1.91	0.98	0.93	High	High	High	High	High	High	High	High	High	High	High	High
FALSE	High	Master Protein	Dlo_pri0025F.1_g04710.1	Dlo_pri0025F.1_g04710.1	0	54.12	42	9	32	9	297	31.3	5	769	9	0	0	0.962	1.042	0.972	1.084	1.011	0.933	1	1	1	1	1	1	100.6	96.7	104.8	97.8	0.48	3.34	0.82	3.4	High	High	High	High	High	High	High	High	High	High	High	High
FALSE	High	Master Protein	Dlo_pri0044F.1_g02210.1	Dlo_pri0044F.1_g02210.1	0	54.634	29	9	31	2	407	45	10.39	764	9	0	8	0.992	0.968	0.997	0.976	1.005	1.03	1	1	1	1	1	1	101.1	100.3	97.9	100.8	0.21	0.08	2.76	2.37	High	High	High	High	High	High	High	High	High	High	High	High
FALSE	High	Master Protein	Dlo_pri0199F.1_g00380.1	Dlo_pri0199F.1_g00380.1	0	71.006	24	14	31	11	674	76	7.36	820	14	0	3	0.669	0.877	0.895	1.312	1.339	1.02	1	1	1	1	1	1	116.2	77.7	102	104.1	4.89	12.69	2.09	2.67	High	High	High	High	High	High	High	High	High	High	High	High
FALSE	High	Master Protein	Dlo_pri0132F.1_g00460.1	Dlo_pri0132F.1_g00460.1	0	57.6	32	9	31	3	370	40.6	7.03	816	9	0	6	1.017	1.06	0.902	1.043	0.887	0.851	1	1	1	1	1	1	100.5	102.2	106.6	90.7	0.41	1.8	1.11	2.82	High	High	High	High	High	High	High	High	High	High	High	High
FALSE	High	Master Protein	Dlo_alt0015F-013-01.1_g00010.1	Dlo_alt0015F-013-01.1_g00010.1	0	57.663	9	11	31	2	1451	163.7	8.28	706	11	0	0	1.342	1.287	1.497	0.959	1.116	1.164	1	1	1	1	1	1	78	104.7	100.4	116.9	13.55	3.63	6.45	11.38	High	High	High	High	High	High	High	High	High	High	High	High
FALSE	High	Master Protein	Dlo_pri0580F.1_g00070.1	Dlo_pri0580F.1_g00070.1	0	32.144	12	4	31	1	300	31.5	4.55	653	4	0	5	1.412	0.543	3.248	0.385	2.301	5.977	1	1	0.212611	0.429005	0.816541	0.0334286	64.5	91	35	209.4	6	5.74	7.87	2.49	High	High	High	High	High	High	High	High	High	High	High	High
FALSE	High	Master Protein	Dlo_pri0002F.1_g06620.1	Dlo_pri0002F.1_g06620.1	0	52.32	23	10	31	10	589	66.3	5.97	886	10	0	0	0.911	1.008	0.885	1.107	0.972	0.878	1	1	1	1	1	1	105.2	95.8	106	93.1	1.37	1.47	1.03	0.97	High	High	High	High	High	High	High	High	High	High	High	High
FALSE	High	Master Protein	Dlo_pri0025F.1_g04830.1	Dlo_pri0025F.1_g04830.1	0	37.32	34	8	31	8	250	27.1	7.44	738	8	0	0	0.961	1.061	0.92	1.105	0.958	0.867	1	1	1	1	1	1	101.5	97.5	107.7	93.4	2.8	0.26	2.83	2.63	High	High	High	High	High	High	High	High	High	High	High	High
FALSE	High	Master Protein	Dlo_pri0159F.1_g01800.1	Dlo_pri0159F.1_g01800.1	0	46.643	26	6	31	6	302	33.8	9.72	781	6	0	0	0.789	0.946	0.835	1.199	1.058	0.882	1	1	1	1	1	1	112.1	88.4	106	93.5	1.5	3.37	1.72	3.63	High	High	High	High	High	High	High	High	High	High	High	High
FALSE	High	Master Protein	Dlo_alt0565F-003-01.1_g00010.1	Dlo_alt0565F-003-01.1_g00010.1	0	41.1	24	8	31	6	439	47.4	5.48	767	8	0	2	0.812	1.012	0.83	1.245	1.022	0.821	1	1	1	1	1	1	109.5	88.9	110.7	90.9	2.13	4.87	4.01	2.58	High	High	High	High	High	High	High	High	High	High	High	High
FALSE	High	Master Protein	Dlo_pri0136F.1_g01230.1	Dlo_pri0136F.1_g01230.1	0	84.426	28	10	31	1	450	49.1	7.34	855	10	0	0	0.844	1.055	0.9	1.249	1.066	0.853	1	1	1	1	1	1	105.3	88.9	111.1	94.8	8.52	9.13	10.39	5.93	High	High	High	High	High	High	High	High	High	High	High	High
FALSE	High	Master Protein	Dlo_pri0124F.1_g01450.1	Dlo_pri0124F.1_g01450.1	0	48.793	31	7	31	7	261	28.3	10.98	818	7	0	0	0.701	0.971	0.961	1.385	1.371	0.99	0.816893	1	1	0.977119	1	1	110.1	77.2	106.9	105.8	0.94	2.53	1.83	1.12	High	High	High	High	High	High	High	High	High	High	High	High
FALSE	High	Master Protein	Dlo_pri0079F.1_g04380.1	Dlo_pri0079F.1_g04380.1	0	47.786	16	9	31	9	529	59.3	4.87	635	9	0	0	0.586	0.852	0.678	1.453	1.157	0.796	1	1	1	1	1	1	128.3	75.3	109.3	87.1	3.52	4.04	3.3	1.09	High	High	High	High	High	High	High	High	High	High	High	High
FALSE	High	Master Protein	Dlo_pri0000F.1_g07830.1	Dlo_pri0000F.1_g07830.1	0	62.446	32	9	31	9	344	35.8	8.76	806	9	0	0	0.918	0.908	0.894	0.989	0.973	0.984	1	1	1	1	1	1	107.5	98.7	97.7	96.1	0.89	1.36	1.85	1.51	High	High	High	High	High	High	High	High	High	High	High	High
FALSE	High	Master Protein	Dlo_alt0076F-014-01.1_g00020.1	Dlo_alt0076F-014-01.1_g00020.1	0	72.583	17	13	31	13	935	104.9	5.6	743	13	0	0	0.913	0.974	1.038	1.066	1.136	1.066	1	1	1	1	1	1	101.9	93.1	99.2	105.8	0.37	1.24	0.24	0.97	High	High	High	High	High	High	High	High	High	High	High	High
FALSE	High	Master Protein	Dlo_pri0275F.1_g01360.1	Dlo_pri0275F.1_g01360.1	0	75.938	31	11	31	2	497	54.7	7.65	967	11	0	0	0.731	0.942	0.84	1.288	1.149	0.892	1	1	1	1	1	1	113.9	83.2	107.3	95.6	0.3	7.08	3.27	9.46	High	Not Found	High	High	Not Found	High	High	Not Found	High	High	Not Found	High
FALSE	High	Master Protein	Dlo_pri0132F.1_g00680.1	Dlo_pri0132F.1_g00680.1	0	38.561	51	6	30	1	166	17.9	8.95	816	6	0	5	1.013	0.935	1.005	0.923	0.993	1.075	1	1	1	1	1	1	101.2	102.5	94.6	101.7	0.62	1.57	2.05	0.9	High	High	Not Found	High	High	Not Found	High	High	Not Found	High	High	Not Found
FALSE	High	Master Protein	Dlo_pri0267F.1_g01140.1	Dlo_pri0267F.1_g01140.1	0	84.553	37	10	30	5	391	41.5	7.52	971	10	0	7	0.999	0.92	0.994	0.921	0.994	1.08	1	1	1	1	1	1	102.2	102.2	94	101.6	2.1	4.27	1.65	1.47	High	High	High	High	High	High	High	High	High	High	High	High
FALSE	High	Master Protein	Dlo_pri0219F.1_g01170.1	Dlo_pri0219F.1_g01170.1	0	55.673	38	10	30	10	354	39.4	5.2	738	10	0	0	0.993	0.93	0.984	0.936	0.991	1.058	1	1	1	1	1	1	102.4	101.7	95.2	100.7	2.35	1.92	1.52	2.02	High	High	High	High	High	High	High	High	High	High	High	High
FALSE	High	Master Protein	Dlo_pri0072F.1_g03370.1	Dlo_pri0072F.1_g03370.1	0	58.918	57	10	30	10	223	24.7	6.54	831	10	0	0	1.126	0.993	0.941	0.882	0.835	0.947	1	1	1	1	1	1	98.5	111	97.8	92.7	2.59	5.14	4.9	1.55	High	High	High	High	High	High	High	High	High	High	High	High
FALSE	High	Master Protein	Dlo_alt0004F-011-01.1_g00040.1	Dlo_alt0004F-011-01.1_g00040.1	0	61.852	26	12	30	12	565	63.2	5.45	702	12	0	0	1.325	1.01	1.293	0.762	0.976	1.28	1	1	1	1	1	1	86.4	114.5	87.3	111.8	1.92	0.39	3.39	3.2	High	High	High	High	High	High	High	High	High	High	High	High
FALSE	High	Master Protein	Dlo_pri0015F.1_g01620.1	Dlo_pri0015F.1_g01620.1	0	59.856	9	11	30	2	1448	163.2	8.46	714	11	0	9	1.462	1.279	1.642	0.875	1.123	1.284	1	1	1	1	1	1	74.3	108.6	95	122	2.07	1.61	2.46	1.26	High	High	High	High	High	High	High	High	High	High	High	High
FALSE	High	Master Protein	Dlo_pri0469F.1_g00500.1	Dlo_pri0469F.1_g00500.1	0	32.159	12	4	30	1	298	31.2	4.65	651	4	0	0	2.122	0.441	3.79	0.208	1.786	8.585	0.724947	1	0.13348	0.037663	1	0.0102434	54.4	115.4	24	206.2	3.3	1.55	6.2	2.01	High	High	High	High	High	High	High	High	High	High	High	High
FALSE	High	Master Protein	Dlo_pri0144F.1_g01900.1	Dlo_pri0144F.1_g01900.1	0	53.42	35	10	30	9	331	36.3	6.14	704	10	0	1	1.092	1.016	1.134	0.931	1.039	1.116	1	1	1	1	1	1	94.3	103	95.8	106.9	0.89	0.95	0.57	0.06	High	High	High	High	High	High	High	High	High	High	High	High
FALSE	High	Master Protein	Dlo_pri0070F.1_g03330.1	Dlo_pri0070F.1_g03330.1	0	74.309	26	9	30	4	526	56.3	9.25	929	9	0	0	1.013	0.875	0.785	0.863	0.775	0.898	1	1	1	1	1	1	108.9	110.3	95.3	85.5	1.5	0.92	1.01	2.2	High	High	High	High	High	High	High	High	High	High	High	High
FALSE	High	Master Protein	Dlo_pri0016F.1_g05770.1	Dlo_pri0016F.1_g05770.1	0	53.71	60	10	30	2	206	23.1	5.19	811	10	0	8	1.069	1.026	0.982	0.959	0.919	0.958	1	1	1	1	1	1	98.1	104.9	100.6	96.4	0.61	2.1	2.28	0.43	High	High	Not Found	High	High	Not Found	High	High	Not Found	High	High	Not Found
FALSE	High	Master Protein	Dlo_pri0070F.1_g00410.1	Dlo_pri0070F.1_g00410.1	0	45.789	9	8	30	2	986	107.5	5.39	847	8	0	0	0.947	0.998	1.053	1.054	1.111	1.055	1	1	1	1	1	1	100.1	94.8	99.9	105.3	3.36	4.93	2.65	1.56	High	High	High	High	High	High	High	High	High	High	High	High
FALSE	High	Master Protein	Dlo_pri0106F.1_g01250.1	Dlo_pri0106F.1_g01250.1	0	47.13	24	7	30	7	327	35.9	8.69	644	7	0	0	0.919	0.911	0.993	0.991	1.081	1.09	1	1	1	1	1	1	104.7	96.2	95.3	103.9	1.08	1.05	1.58	1.16	High	High	High	High	High	High	High	High	High	High	High	High
FALSE	High	Master Protein	Dlo_pri0101F.1_g03260.1	Dlo_pri0101F.1_g03260.1	0	37.069	19	7	30	7	360	39.7	6.55	702	7	0	0	1.181	0.832	1.091	0.704	0.924	1.312	1	1	1	1	1	1	97.5	115.1	81.1	106.3	1.08	1.07	2.31	1.55	High	High	High	High	High	High	High	High	High	High	High	High
FALSE	High	Master Protein	Dlo_alt0098F-018-01.1_g00060.1	Dlo_alt0098F-018-01.1_g00060.1	0	51.775	25	8	29	8	365	40.7	8.28	702	8	0	0	1.196	1.003	1.098	0.839	0.919	1.096	1	1	1	1	1	1	93.1	111.3	93.3	102.3	0.74	1.98	1.7	0.63	High	High	High	High	High	High	High	High	High	High	High	High
FALSE	High	Master Protein	Dlo_pri0200F.1_g02020.1	Dlo_pri0200F.1_g02020.1	0	56.264	19	10	29	3	629	68.4	6.38	706	10	0	0	1.187	0.982	1.132	0.828	0.953	1.152	1	1	1	1	1	1	93	110.4	91.4	105.2	3.74	4.12	2.41	1.58	High	High	High	High	High	High	High	High	High	High	High	High
FALSE	High	Master Protein	Dlo_pri0006F.1_g07390.1	Dlo_pri0006F.1_g07390.1	0	42.402	26	5	29	5	321	36.4	6.52	951	5	0	0	0.85	1.033	1.069	1.215	1.258	1.035	1	1	1	1	1	1	101.2	86	104.5	108.2	0.27	2.42	1.67	0.35	High	High	High	High	High	High	High	High	High	High	High	High
FALSE	High	Master Protein	Dlo_pri0039F.1_g03900.1	Dlo_pri0039F.1_g03900.1	0	33.011	21	6	29	3	296	32.8	4.77	793	6	0	1	1.076	1.03	1.018	0.957	0.947	0.989	1	1	1	1	1	1	97	104.3	99.9	98.8	1.44	1.14	2.99	2.24	High	High	High	High	High	High	High	High	High	High	High	High
FALSE	High	Master Protein	Dlo_pri0033F.1_g01830.1	Dlo_pri0033F.1_g01830.1	0	81.355	28	11	29	8	543	60	8.29	1028	11	0	3	0.905	1.025	0.906	1.132	1.001	0.884	1	1	1	1	1	1	104.3	94.4	106.8	94.5	3.19	1.52	6.4	5.11	High	High	High	High	High	High	High	High	High	High	High	High
FALSE	High	Master Protein	Dlo_pri0678F.1_g00090.1	Dlo_pri0678F.1_g00090.1	0	51.238	41	5	29	1	167	18.8	4.73	689	5	0	0	0.784	0.85	0.76	1.084	0.969	0.894	1	1	1	1	1	1	117.9	92.4	100.2	89.5	3.14	3.93	5.88	2.2	High	High	High	High	High	High	High	High	High	High	High	High
FALSE	High	Master Protein	Dlo_pri0337F.1_g00290.1	Dlo_pri0337F.1_g00290.1	0	67.882	28	12	29	12	595	65	8.29	741	12	0	0	1.159	1.143	1.051	0.986	0.907	0.92	0.0388705	0.14391	1	1	0.250527	0.398924	91.9	106.5	105	96.6	2.01	1.43	0.97	0.87	High	High	High	High	High	High	High	High	High	High	High	High
FALSE	High	Master Protein	Dlo_pri0072F.1_g03700.1	Dlo_pri0072F.1_g03700.1	0	48.381	27	8	29	8	419	43.3	5.21	844	8	0	0	0.543	1.218	0.878	2.241	1.616	0.721	0.610877	1	1	0.183997	1	1	109.9	59.7	133.9	96.5	1.32	1.35	0.37	1.32	High	High	High	High	High	High	High	High	High	High	High	High
FALSE	High	Master Protein	Dlo_pri0002F.1_g00760.1	Dlo_pri0002F.1_g00760.1	0	72.159	27	11	29	11	482	55	5.24	748	11	0	0	1.299	1.209	1.466	0.931	1.128	1.213	1	1	1	1	1	1	80.4	104.5	97.2	117.9	3.05	0.62	2.66	3.95	High	High	High	High	High	High	High	High	High	High	High	High
FALSE	High	Master Protein	Dlo_pri0292F.1_g01000.1	Dlo_pri0292F.1_g01000.1	0	56.17	29	9	29	9	384	42.3	7.93	803	9	0	0	1.773	0.888	1.413	0.501	0.797	1.59	1	1	1	0.956149	1	1	78.8	139.8	70	111.4	1.99	0.37	1.3	1.85	High	High	High	High	High	High	High	High	High	High	High	High
FALSE	High	Master Protein	Dlo_pri0081F.1_g00330.1	Dlo_pri0081F.1_g00330.1	0	62.43	30	9	29	4	423	47.3	6.57	833	9	0	6	0.841	0.972	0.887	1.155	1.055	0.913	1	1	1	1	1	1	108.1	90.9	105	95.9	0.75	1.98	1.34	2.07	High	High	High	High	High	High	High	High	High	High	High	High
FALSE	High	Master Protein	Dlo_pri0822F.1_g00340.1	Dlo_pri0822F.1_g00340.1	0	72.63	16	11	28	2	924	101.8	7.61	726	11	0	0	1.091	1.125	0.971	1.032	0.891	0.863	1	1	1	1	1	1	95.5	104.2	107.5	92.8	3.08	1.5	9.21	5.83	High	High	Not Found	High	High	Not Found	High	High	Not Found	High	High	Not Found
FALSE	High	Master Protein	Dlo_pri0178F.1_g01250.1	Dlo_pri0178F.1_g01250.1	0	47.382	57	7	28	7	164	18.2	6.34	968	7	0	0	0.916	1.012	0.796	1.105	0.869	0.786	1	1	1	1	1	1	107.4	98.4	108.7	85.5	0.35	0.27	1.04	1.33	High	High	High	High	High	High	High	High	High	High	High	High
FALSE	High	Master Protein	Dlo_pri0235F.1_g01420.1	Dlo_pri0235F.1_g01420.1	0	65.048	27	11	28	10	545	59.8	7.97	805	11	0	1	0.963	1.054	0.966	1.095	1.004	0.917	1	1	1	1	1	1	100.4	96.7	105.8	97	1.12	7.12	7.51	0.74	High	High	High	High	High	High	High	High	High	High	High	High
FALSE	High	Master Protein	Dlo_pri0253F.1_g00660.1	Dlo_pri0253F.1_g00660.1	0	47.103	28	7	28	6	319	35.1	6.4	924	7	0	0	0.663	0.897	0.81	1.352	1.222	0.904	1	1	1	1	1	1	118.7	78.7	106.4	96.2	2.02	1.67	0.54	2.53	High	High	High	High	High	High	High	High	High	High	High	High
FALSE	High	Master Protein	Dlo_pri0038F.1_g03730.1	Dlo_pri0038F.1_g03730.1	0	47.628	17	10	28	10	553	61.9	5.2	632	10	0	0	0.666	1.035	0.74	1.553	1.11	0.715	1	1	1	1	1	1	116.2	77.5	120.3	86	1.15	2.3	1.27	2.01	High	High	High	High	High	High	High	High	High	High	High	High
FALSE	High	Master Protein	Dlo_pri0030F.1_g02470.1	Dlo_pri0030F.1_g02470.1	0	54.576	17	13	28	12	825	89.6	4.89	710	13	0	0	1.501	1.06	0.93	0.706	0.619	0.877	1	1	1	1	1	1	89.1	133.7	94.4	82.8	6.46	8.67	6.94	2.36	High	High	High	High	High	High	High	High	High	High	High	High
FALSE	High	Master Protein	Dlo_pri0002F.1_g04040.1	Dlo_pri0002F.1_g04040.1	0	54.008	48	10	28	10	246	27.4	6.32	719	10	0	0	0.904	0.951	0.91	1.052	1.007	0.957	1	1	1	1	1	1	106.2	96	101	96.7	1.52	1.8	2.74	2.59	High	High	High	High	High	High	High	High	High	High	High	High
FALSE	High	Master Protein	Dlo_pri0065F.1_g02790.1	Dlo_pri0065F.1_g02790.1	0	75.819	32	13	28	5	496	53.1	6.96	775	13	0	8	1.065	1.036	0.938	0.972	0.881	0.906	1	1	1	1	1	1	99	105.5	102.6	92.9	1.21	3.32	2.82	1.17	High	High	High	High	High	High	High	High	High	High	High	High
FALSE	High	Master Protein	Dlo_pri0351F.1_g00200.1	Dlo_pri0351F.1_g00200.1	0	44.353	26	7	28	7	326	35.5	5.63	728	7	0	0	0.953	0.966	0.893	1.014	0.937	0.924	1	1	1	1	1	1	104.9	100	101.4	93.7	6.46	9.91	2.66	3.56	High	High	High	High	High	High	High	High	High	High	High	High
FALSE	High	Master Protein	Dlo_pri0138F.1_g00320.1	Dlo_pri0138F.1_g00320.1	0	72.306	22	10	28	8	642	70	8.05	658	10	0	2	0.886	0.995	1.037	1.123	1.171	1.042	1	1	1	1	1	1	102.1	90.4	101.6	105.9	0.96	1.41	2.66	2.82	High	High	High	High	High	High	High	High	High	High	High	High
FALSE	High	Master Protein	Dlo_pri0361F.1_g00260.1	Dlo_pri0361F.1_g00260.1	0	33.874	29	8	28	3	305	35	4.83	580	8	0	3	0.911	0.947	0.914	1.039	1.003	0.966	1	1	1	1	1	1	106	96.6	100.4	96.9	2.38	2.72	2.57	1.74	High	High	High	High	High	High	High	High	High	High	High	High
FALSE	High	Master Protein	Dlo_alt0092F-003-01.1_g00030.1	Dlo_alt0092F-003-01.1_g00030.1	0	56.65	13	7	28	7	819	92.7	8.97	829	7	0	0	1.055	0.911	0.996	0.864	0.945	1.094	1	1	1	1	1	1	101	106.5	92	100.6	0.97	1.09	1.13	1.99	High	High	High	High	High	High	High	High	High	High	High	High
FALSE	High	Master Protein	Dlo_pri0044F.1_g02160.1	Dlo_pri0044F.1_g02160.1	0	45.563	24	8	28	1	407	45	10.35	694	8	0	0																					Not Found	High	Not Found	Not Found	High	Not Found	Not Found	High	Not Found	Not Found	High	Not Found
FALSE	High	Master Protein	Dlo_alt0072F-008-01.1_g00050.1	Dlo_alt0072F-008-01.1_g00050.1	0	44.099	55	7	28	7	164	17.8	5.91	681	7	0	0	0.897	1.087	0.87	1.212	0.969	0.8	1	1	1	1	1	1	103.8	93.1	112.8	90.3	0.42	2.36	1.68	0.95	High	High	High	High	High	High	High	High	High	High	High	High
FALSE	High	Master Protein	Dlo_alt0426F-003-01.1_g00070.1	Dlo_alt0426F-003-01.1_g00070.1	0	52.844	46	9	28	3	221	24.7	5.31	776	9	0	0	1.142	1.095	0.94	0.959	0.823	0.858	1	1	1	1	1	1	95.8	109.3	104.9	90	2.52	0.55	4.98	2.91	High	High	High	High	High	High	High	High	High	High	High	High
FALSE	High	Master Protein	Dlo_pri0255F.1_g00780.1	Dlo_pri0255F.1_g00780.1	0	57.301	25	9	27	9	481	55	8.84	697	9	0	0	1.017	1.033	0.974	1.016	0.958	0.943	1	1	1	1	1	1	99.4	101.1	102.7	96.8	0.64	0.95	0.78	1.68	High	High	High	High	High	High	High	High	High	High	High	High
FALSE	High	Master Protein	Dlo_pri0039F.1_g03490.1	Dlo_pri0039F.1_g03490.1	0	51.258	62	10	27	4	218	24.2	5.69	550	10	0	5	1.006	1.115	0.928	1.109	0.923	0.832	1	1	1	1	1	1	98.8	99.4	110.2	91.7	1.08	0.98	2.39	1.72	High	High	High	High	High	High	High	High	High	High	High	High
FALSE	High	Master Protein	Dlo_pri0072F.1_g03020.1	Dlo_pri0072F.1_g03020.1	0	58.962	19	12	27	5	793	86.4	7.77	661	12	0	8	1.253	0.972	1.278	0.776	1.02	1.315	1	1	1	1	1	1	88.8	111.3	86.3	113.5	8.63	2.56	5	7.62	High	High	High	High	High	High	High	High	High	High	High	High
FALSE	High	Master Protein	Dlo_pri0015F.1_g04710.1	Dlo_pri0015F.1_g04710.1	0	41.917	44	7	27	3	158	17.1	6.64	542	7	0	5	0.538	0.706	1.197	1.312	2.226	1.696	0.816893	1	1	1	0.579224	1	116.2	62.5	82.1	139.2	1.24	1.74	2.42	2.36	High	High	High	High	High	High	High	High	High	High	High	High
FALSE	High	Master Protein	Dlo_pri0140F.1_g02110.1	Dlo_pri0140F.1_g02110.1	0	41.384	11	9	27	8	955	109.6	9.04	553	9	0	0	1.076	1.057	0.97	0.983	0.902	0.918	1	1	1	1	1	1	97.5	104.9	103.1	94.6	2.52	3.41	2.36	0.87	High	High	High	High	High	High	High	High	High	High	High	High
FALSE	High	Master Protein	Dlo_pri0118F.1_g03090.1	Dlo_pri0118F.1_g03090.1	0	70.538	52	9	27	9	267	28.6	5.53	933	9	0	0	1.39	1.02	1.106	0.733	0.796	1.085	1	1	1	1	1	1	88.6	123.1	90.3	98	2.69	3.82	3.88	0.65	High	High	High	High	High	High	High	High	High	High	High	High
FALSE	High	Master Protein	Dlo_pri0191F.1_g00290.1	Dlo_pri0191F.1_g00290.1	0	35.568	27	5	27	1	254	27.3	9.48	722	5	0	0																					Not Found	Not Found	Not Found	Not Found	High	Not Found	Not Found	Not Found	Not Found	Not Found	Not Found	Not Found
FALSE	High	Master Protein	Dlo_pri0292F.1_g01390.1	Dlo_pri0292F.1_g01390.1	0	57.121	19	8	27	2	487	54.3	6.02	792	8	0	7	0.701	0.879	0.714	1.255	1.02	0.813	1	1	1	1	1	1	121.4	85.1	106.8	86.8	3.39	7.37	3.48	1.73	High	High	High	High	High	High	High	High	High	High	High	High
FALSE	High	Master Protein	Dlo_pri0335F.1_g00060.1	Dlo_pri0335F.1_g00060.1	0	54.169	25	10	27	10	487	53	7.96	747	10	0	0	1.137	0.957	0.984	0.841	0.865	1.029	1	1	1	1	1	1	98.1	111.6	93.8	96.5	9.85	0.41	2.19	10.18	High	High	High	High	High	High	High	High	High	High	High	High
FALSE	High	Master Protein	Dlo_alt0160F-009-01.1_g00110.1	Dlo_alt0160F-009-01.1_g00110.1	0	61.648	7	14	27	14	2348	262.6	6.86	611	14	0	0	1.049	1.149	1.132	1.096	1.079	0.985	1	1	1	1	1	1	92.4	96.9	106.2	104.6	2.5	3.19	3.96	3.06	High	High	High	High	High	High	High	High	High	High	High	High
FALSE	High	Master Protein	Dlo_pri0150F.1_g00570.1	Dlo_pri0150F.1_g00570.1	0	49.844	20	10	27	10	535	57.9	7.4	618	10	0	0	0.892	1.093	0.924	1.225	1.036	0.846	1	1	1	1	1	1	102.3	91.3	111.8	94.6	2.14	4.93	3.74	5.21	High	High	High	High	High	High	High	High	High	High	High	High
FALSE	High	Master Protein	Dlo_pri0149F.1_g00120.1	Dlo_pri0149F.1_g00120.1	0	58.232	18	10	27	1	678	75.2	6.73	763	10	0	9	1.034	1.002	1.118	0.969	1.081	1.115	1	1	1	1	1	1	96.3	99.6	96.5	107.6	2.36	0.6	3.72	5.66	High	High	Not Found	High	High	Not Found	High	High	Not Found	High	High	Not Found
FALSE	High	Master Protein	Dlo_pri0200F.1_g01900.1	Dlo_pri0200F.1_g01900.1	0	45.114	38	6	27	4	194	21.8	10.52	659	6	0	2	0.877	0.999	1.015	1.139	1.158	1.016	1	1	1	1	1	1	102.8	90.2	102.7	104.4	1.6	4.74	2.92	0.48	High	High	High	High	High	High	High	High	High	High	High	High
FALSE	High	Master Protein	Dlo_pri0006F.1_g00640.1	Dlo_pri0006F.1_g00640.1	0	52.671	28	10	26	6	548	61.5	7.08	646	10	0	4	0.77	0.811	0.895	1.054	1.164	1.104	1	1	1	1	1	1	115.1	88.6	93.3	103.1	1.3	4.87	3.48	1.34	High	High	High	High	High	High	High	High	High	High	High	High
FALSE	High	Master Protein	Dlo_pri0028F.1_g05040.1	Dlo_pri0028F.1_g05040.1	0	45.904	34	9	26	9	302	33.2	7.52	536	9	0	0	0.969	1.098	0.67	1.133	0.691	0.61	1	1	1	1	1	1	107	103.7	117.5	71.7	1.14	0.7	0.5	1.32	High	High	High	High	High	High	High	High	High	High	High	High
FALSE	High	Master Protein	Dlo_pri0148F.1_g01640.1	Dlo_pri0148F.1_g01640.1	0	53.631	65	6	26	6	164	18.1	7.33	702	6	0	0	1.076	1.191	0.971	1.107	0.903	0.816	1	1	1	1	1	1	94.4	101.5	112.4	91.7	2.78	1.75	0.74	2.76	High	High	High	High	High	High	High	High	High	High	High	High
FALSE	High	Master Protein	Dlo_pri0105F.1_g00600.1	Dlo_pri0105F.1_g00600.1	0	68.822	18	14	26	12	1011	113.9	6.37	652	14	0	2	1.293	0.989	1.278	0.765	0.988	1.293	1	1	1	1	1	1	87.7	113.4	86.7	112.1	10.58	5.53	4.34	5.04	High	High	High	High	High	High	High	High	High	High	High	High
FALSE	High	Master Protein	Dlo_pri0325F.1_g01370.1	Dlo_pri0325F.1_g01370.1	0	53.995	67	7	26	7	115	12.2	8.09	712	7	0	0	0.984	0.906	0.873	0.92	0.887	0.964	1	1	1	1	1	1	106.3	104.6	96.3	92.8	1.12	1.2	6.11	3.63	High	High	High	High	High	High	High	High	High	High	High	High
FALSE	High	Master Protein	Dlo_pri0015F.1_g04440.1	Dlo_pri0015F.1_g04440.1	0	56.827	28	10	26	9	363	40.4	8.05	738	10	0	0	0.996	0.839	0.506	0.843	0.508	0.603	1	1	0.0613266	1	0.066345	0.15452	119.7	119.2	100.5	60.6	3.43	1.13	1.07	6.42	High	High	High	High	High	High	High	High	High	High	High	High
FALSE	High	Master Protein	Dlo_pri1861F.1_g00070.1	Dlo_pri1861F.1_g00070.1	0	46.324	23	8	26	7	413	46.3	7.8	642	8	0	0	1.392	1.717	2.671	1.233	1.919	1.556	1	1	1	1	1	1	59	82.1	101.3	157.6	9	6.33	3.52	4.07	High	High	High	High	High	High	High	High	High	High	High	High
FALSE	High	Master Protein	Dlo_pri0112F.1_g00900.1	Dlo_pri0112F.1_g00900.1	0	38.943	35	5	26	5	166	17.9	8.82	886	5	0	0	0.711	1.316	2.359	1.851	3.316	1.792	1	1	0.813742	1	0.304251	1	74.3	52.8	97.7	175.2	4.53	3.27	3.25	1.63	High	High	High	High	High	High	High	High	High	High	High	High
FALSE	High	Master Protein	Dlo_pri0134F.1_g01120.1	Dlo_pri0134F.1_g01120.1	0	27.789	40	5	26	3	144	15.9	10.18	804	5	0	2	1.09	0.952	0.991	0.873	0.909	1.042	1	1	1	1	1	1	99.2	108.1	94.4	98.3	0.28	0.88	0.16	0.78	High	High	High	High	High	High	High	High	High	High	High	High
FALSE	High	Master Protein	Dlo_pri0268F.1_g00130.1	Dlo_pri0268F.1_g00130.1	0	34.117	25	7	26	7	303	33.5	8.28	585	7	0	0	1.495	1.011	1.134	0.677	0.759	1.121	1	1	1	1	1	1	86.2	128.9	87.2	97.8	1.52	2.06	1.74	2.52	High	High	High	High	High	High	High	High	High	High	High	High
FALSE	High	Master Protein	Dlo_pri0149F.1_g00930.1	Dlo_pri0149F.1_g00930.1	0	47.027	9	3	26	1	424	46.9	5.83	773	3	0	4	1.113	1.214	1.449	1.091	1.302	1.193	1	1	0.583519	1	1	1	83.8	93.2	101.7	121.4	2	1.16	1.39	1.27	High	High	High	High	High	High	High	High	High	High	High	High
FALSE	High	Master Protein	Dlo_pri0143F.1_g02120.1	Dlo_pri0143F.1_g02120.1	0	45.052	34	10	26	4	325	34.3	5.44	674	10	0	6	0.991	1.077	0.998	1.087	1.007	0.926	1	1	1	1	1	1	98.4	97.5	106	98.1	1.92	1.21	1.01	2.06	High	High	High	High	High	High	High	High	High	High	High	High
FALSE	High	Master Protein	Dlo_pri0117F.1_g00050.1	Dlo_pri0117F.1_g00050.1	0	56.472	25	9	26	9	483	53.1	8.27	709	9	0	0	0.913	0.87	0.838	0.954	0.918	0.962	1	1	1	1	1	1	110.5	100.8	96.2	92.6	2.18	4.13	3.48	1.41	High	High	High	High	High	High	High	High	High	High	High	High
FALSE	High	Master Protein	Dlo_pri0001F.1_g12440.1	Dlo_pri0001F.1_g12440.1	0	42.469	28	6	26	6	282	30.8	8.37	645	6	0	0	0.8	1.023	0.831	1.278	1.039	0.813	1	1	1	1	1	1	109.5	87.6	112	91	1.18	1.2	1.46	0.24	High	High	High	High	High	High	High	High	High	High	High	High
FALSE	High	Master Protein	Dlo_pri0076F.1_g03020.1	Dlo_pri0076F.1_g03020.1	0	57.148	14	8	26	7	762	83.8	6.07	759	8	0	1	0.664	2.188	1.715	3.293	2.581	0.784	1	1	1	0.284654	0.881012	1	71.8	47.7	157.2	123.2	3.43	3.95	1.41	0.99	High	High	High	High	High	High	High	High	High	High	High	High
FALSE	High	Master Protein	Dlo_pri0164F.1_g01510.1	Dlo_pri0164F.1_g01510.1	0	34.837	22	6	26	6	328	36.6	7.44	622	6	0	0	0.988	1.024	0.998	1.036	1.01	0.974	1	1	1	1	1	1	99.7	98.6	102.2	99.5	3.58	2.22	1.45	0.37	High	High	High	High	High	High	High	High	High	High	High	High
FALSE	High	Master Protein	Dlo_pri0006F.1_g07590.1	Dlo_pri0006F.1_g07590.1	0	41.367	37	5	26	1	167	18.8	4.79	617	5	0	5	0.672	1.009	0.755	1.501	1.124	0.749	1	1	1	1	1	1	116.4	78.2	117.4	87.9	0.27	6.77	5.21	3.76	Not Found	High	Not Found	Not Found	High	Not Found	Not Found	High	Not Found	Not Found	High	Not Found
FALSE	High	Master Protein	Dlo_pri0000F.1_g04850.1	Dlo_pri0000F.1_g04850.1	0	52.258	20	9	26	9	580	61.5	6.42	756	9	0	0	0.894	0.963	0.841	1.078	0.941	0.873	1	1	1	1	1	1	108.2	96.7	104.2	90.9	0.9	3.62	2.48	0.7	High	High	High	High	High	High	High	High	High	High	High	High
FALSE	High	Master Protein	Dlo_pri1370F.1_g00060.1	Dlo_pri1370F.1_g00060.1	0	55.826	19	10	26	1	592	65.9	6.25	700	10	0	0	1.206	0.952	1.118	0.79	0.927	1.175							93.5	112.8	89.1	104.6					Not Found	High	Not Found	Not Found	High	Not Found	Not Found	High	Not Found	Not Found	High	Not Found
FALSE	High	Master Protein	Dlo_pri0304F.1_g00240.1	Dlo_pri0304F.1_g00240.1	0	34.882	20	7	26	2	398	42.8	5.8	671	7	0	0	1.093	0.808	1.073	0.74	0.981	1.327	1	1	1	1	1	1	100.6	110	81.4	108	8.38	4.59	9.71	4.18	Not Found	High	High	Not Found	High	High	Not Found	High	High	Not Found	High	High
FALSE	High	Master Protein	Dlo_pri0637F.1_g00280.1	Dlo_pri0637F.1_g00280.1	0	42.291	44	7	26	2	216	24.5	9.79	629	7	0	0	0.849	0.831	0.819	0.979	0.964	0.985	1	1	1	1	1	1	114.3	97.1	95	93.6	4.38	7.07	7.24	3.39	High	High	High	High	High	High	High	High	High	High	High	High
FALSE	High	Master Protein	Dlo_pri0084F.1_g01210.1	Dlo_pri0084F.1_g01210.1	0	57.663	18	14	26	8	911	99.4	8.94	590	14	0	6	0.873	0.866	0.96	0.993	1.099	1.108	1	1	1	1	1	1	108.1	94.4	93.7	103.8	7.47	16.18	2.65	10.97	High	High	High	High	High	High	High	High	High	High	High	High
FALSE	High	Master Protein	Dlo_pri0006F.1_g03440.1	Dlo_pri0006F.1_g03440.1	0	34.353	22	8	26	6	420	44.6	8.66	611	8	0	0	0.751	0.996	0.984	1.326	1.31	0.988	1	1	1	1	1	1	107.2	80.5	106.8	105.5	1.52	1.12	0.79	1.78	High	High	High	High	High	High	High	High	High	High	High	High
FALSE	High	Master Protein	Dlo_pri0158F.1_g00940.1	Dlo_pri0158F.1_g00940.1	0	23.997	31	8	25	4	240	27.6	9.09	363	8	0	4	1.013	0.93	0.855	0.918	0.844	0.919	1	1	1	1	1	1	105.3	106.7	98	90	0.71	1.65	0.5	2.69	High	High	High	High	High	High	High	High	High	High	High	High
FALSE	High	Master Protein	Dlo_pri0006F.1_g04010.1	Dlo_pri0006F.1_g04010.1	0	55.91	19	8	25	8	595	65.8	8.29	722	8	0	0	1.047	1.132	0.941	1.081	0.899	0.831	1	1	1	1	1	1	97.1	101.7	109.9	91.3	0.36	1.44	1.31	0.37	High	High	High	High	High	High	High	High	High	High	High	High
FALSE	High	Master Protein	Dlo_pri0115F.1_g01710.1	Dlo_pri0115F.1_g01710.1	0	35.419	54	7	25	4	173	19.3	5.92	446	7	0	0	0.897	0.986	0.853	1.099	0.951	0.865	1	1	1	1	1	1	107.1	96	105.6	91.3	3.83	1.48	2.21	4.06	High	High	High	High	High	High	High	High	High	High	High	High
FALSE	High	Master Protein	Dlo_pri0250F.1_g01280.1	Dlo_pri0250F.1_g01280.1	0	46.613	21	9	25	9	665	73.4	9.11	813	9	0	0	0.333	0.796	1.111	2.389	3.335	1.396	1	1	1	1	1	1	123.4	41.1	98.3	137.2	3.31	14.81	7.71	4.83	High	High	High	High	High	High	High	High	High	High	High	High
FALSE	High	Master Protein	Dlo_pri0024F.1_g05000.1	Dlo_pri0024F.1_g05000.1	0	47.315	32	8	25	8	323	34	9.03	707	8	0	0	0.743	1.625	1.348	2.187	1.814	0.83	1	1	1	1	1	1	84.8	63	137.8	114.3	2.86	4.18	1.15	2.1	High	High	High	High	High	High	High	High	High	High	High	High
FALSE	High	Master Protein	Dlo_pri0042F.1_g01430.1	Dlo_pri0042F.1_g01430.1	0	60.654	30	8	25	8	318	35.1	6.37	744	8	0	0	1.235	0.975	1.045	0.79	0.846	1.071	1	1	1	1	1	1	94	116.1	91.7	98.2	5.23	2.76	3.57	4.23	High	High	High	High	High	High	High	High	High	High	High	High
FALSE	High	Master Protein	Dlo_pri0084F.1_g01760.1	Dlo_pri0084F.1_g01760.1	0	66.681	27	12	25	6	575	63.1	6.38	630	12	0	0	0.779	0.944	0.998	1.212	1.281	1.057	1	1	1	1	1	1	107.5	83.7	101.5	107.3	3.08	4.12	1.88	1.67	High	High	High	High	High	High	High	High	High	High	High	High
FALSE	High	Master Protein	Dlo_pri0053F.1_g03310.1	Dlo_pri0053F.1_g03310.1	0	37.376	21	5	25	5	327	35.9	7.99	721	5	0	0	0.791	0.919	0.834	1.162	1.054	0.908	1	1	1	1	1	1	112.8	89.3	103.7	94.1	3.54	6.14	2.06	2.84	High	High	High	High	High	High	High	High	High	High	High	High
FALSE	High	Master Protein	Dlo_pri0053F.1_g02510.1	Dlo_pri0053F.1_g02510.1	0	44.108	37	7	25	1	261	29.8	9.86	687	7	0	0	1.139	0.995	1.117	0.873	0.981	1.123							94.1	107.2	93.6	105.1					Not Found	High	Not Found	Not Found	High	Not Found	Not Found	High	Not Found	Not Found	High	Not Found
FALSE	High	Master Protein	Dlo_pri0331F.1_g00980.1	Dlo_pri0331F.1_g00980.1	0	60.007	16	14	25	14	1482	170.8	4.94	466	14	0	0	0.714	1.178	0.945	1.65	1.324	0.802	1	1	1	1	1	1	104.2	74.4	122.8	98.5	2.29	9.62	4.59	0.78	High	High	High	High	High	High	High	High	High	High	High	High
FALSE	High	Master Protein	Dlo_pri0540F.1_g00420.1	Dlo_pri0540F.1_g00420.1	0	59.52	13	9	25	9	876	97.9	8.02	596	9	0	0	1.061	0.942	1.15	0.888	1.084	1.221	1	1	1	1	1	1	96.3	102.2	90.7	110.8	2.04	1.98	2.86	2.55	High	High	High	High	High	High	High	High	High	High	High	High
FALSE	High	Master Protein	Dlo_pri0002F.1_g06450.1	Dlo_pri0002F.1_g06450.1	0	53.32	29	12	25	10	488	53.7	6.37	433	12	0	2	0.833	0.924	0.821	1.109	0.986	0.889	1	1	1	1	1	1	111.8	93.1	103.3	91.8	2.83	5.47	2.2	2.05	High	High	High	High	High	High	High	High	High	High	High	High
FALSE	High	Master Protein	Dlo_pri0045F.1_g00920.1	Dlo_pri0045F.1_g00920.1	0	38.146	21	9	25	9	535	59.1	6.02	647	9	0	0	0.92	1.131	0.888	1.23	0.966	0.786	1	1	1	1	1	1	101.6	93.4	114.8	90.2	1.18	0.97	1.56	1.11	High	High	High	High	High	High	High	High	High	High	High	High
FALSE	High	Master Protein	Dlo_pri0120F.1_g01750.1	Dlo_pri0120F.1_g01750.1	0	47.267	25	11	25	7	472	50.7	7.39	616	11	0	4	1.065	1.006	1.042	0.944	0.978	1.036	1	1	1	1	1	1	97.3	103.6	97.8	101.3	1.54	1.2	1.22	1.56	High	High	High	High	High	High	High	High	High	High	High	High
FALSE	High	Master Protein	Dlo_pri0202F.1_g00960.1	Dlo_pri0202F.1_g00960.1	0	60.452	13	11	25	6	1105	124.4	6.11	673	11	0	5	0.91	0.984	0.852	1.081	0.937	0.867	1	1	1	1	1	1	106.8	97.1	105	91	2.37	2.26	1.96	1.76	High	High	High	High	High	High	High	High	High	High	High	High
FALSE	High	Master Protein	Dlo_pri0290F.1_g00820.1	Dlo_pri0290F.1_g00820.1	0	54.691	17	13	25	13	1001	113	6.57	532	13	0	0	0.971	0.947	1.202	0.976	1.238	1.268	1	1	1	1	1	1	97.1	94.2	92	116.7	1.49	2.78	2.45	1.17	High	High	High	High	High	High	High	High	High	High	High	High
FALSE	High	Master Protein	Dlo_alt0581F-006-01.1_g00010.1	Dlo_alt0581F-006-01.1_g00010.1	0	51.329	16	8	25	1	602	68.6	8.62	770	8	0	0	0.43	0.6	0.967	1.393	2.247	1.613	1	1	1	1	1	1	133.5	57.4	80	129.1	1.58	1.59	4.74	5.16	High	High	High	High	High	High	High	High	High	High	High	High
FALSE	High	Master Protein	Dlo_pri0205F.1_g01200.1	Dlo_pri0205F.1_g01200.1	0	25.232	22	6	25	2	280	32.3	10.23	462	6	0	4	1.247	0.905	1.012	0.726	0.811	1.117	1	1	1	0.956287	1	1	96.1	119.8	87	97.2	2.1	2.93	3.62	1.44	High	High	High	High	High	High	High	High	High	High	High	High
FALSE	High	Master Protein	Dlo_pri0029F.1_g02620.1	Dlo_pri0029F.1_g02620.1	0	44.203	24	8	25	8	431	49.4	6.55	566	8	0	0	1.032	0.995	1.014	0.963	0.982	1.019	1	1	1	1	1	1	99	102.2	98.5	100.4	2.06	1.96	7.39	7.03	High	High	High	High	High	High	High	High	High	High	High	High
FALSE	High	Master Protein	Dlo_pri0386F.1_g00860.1	Dlo_pri0386F.1_g00860.1	0	24.871	59	5	25	5	101	11.2	6.1	759	5	0	0	1.443	0.961	0.846	0.666	0.587	0.881	0.269451	1	1	0.169515	0.0725988	1	94.1	135.8	90.5	79.7	2.22	3.51	1.83	2.66	High	High	High	High	High	High	High	High	High	High	High	High
FALSE	High	Master Protein	Dlo_pri0112F.1_g02730.1	Dlo_pri0112F.1_g02730.1	0	51.541	23	6	25	6	402	44.5	6.8	840	6	0	0	0.888	0.988	0.89	1.112	1.002	0.901	1	1	1	1	1	1	106.2	94.3	104.9	94.5	2.72	5.05	1.57	0.6	High	High	High	High	High	High	High	High	High	High	High	High
FALSE	High	Master Protein	Dlo_pri1482F.1_g00070.1	Dlo_pri1482F.1_g00070.1	0	44.074	17	8	25	3	563	61.4	6.71	622	8	0	5	0.992	0.958	0.952	0.966	0.96	0.994	1	1	1	1	1	1	102.5	101.7	98.2	97.6	2.77	2.14	0.86	2.05	High	High	High	High	High	High	High	High	High	High	High	High
FALSE	High	Master Protein	Dlo_pri0004F.1_g04420.1	Dlo_pri0004F.1_g04420.1	0	61.528	31	10	25	10	464	50.8	8.56	657	10	0	0	0.919	1.044	1.03	1.136	1.121	0.987	1	1	1	1	1	1	100.2	92.1	104.5	103.2	3.44	1.31	2.66	2.04	High	High	High	High	High	High	High	High	High	High	High	High
FALSE	High	Master Protein	Dlo_alt0262F-007-01.1_g00010.1	Dlo_alt0262F-007-01.1_g00010.1	0	47.314	19	6	25	6	351	39.6	6.9	633	6	0	0	1.216	0.953	1.175	0.783	0.966	1.233	1	1	1	1	1	1	92.1	112	87.7	108.2	1.32	0.51	2.44	1.09	High	High	High	High	High	High	High	High	High	High	High	High
FALSE	High	Master Protein	Dlo_pri0053F.1_g04800.1	Dlo_pri0053F.1_g04800.1	0	22.141	25	5	25	2	201	20.8	7.5	609	5	0	0	1.129	1.12	1.002	0.992	0.888	0.895	1	1	1	1	1	1	94.1	106.2	105.4	94.3	2.05	2.9	0.71	4.09	High	High	High	High	High	High	High	High	High	High	High	High
FALSE	High	Master Protein	Dlo_pri1303F.1_g00080.1	Dlo_pri1303F.1_g00080.1	0	60.128	20	11	24	10	768	86.2	7.78	576	11	0	1	2.066	1.204	1.222	0.583	0.591	1.014	1	1	1	1	1	1	72.8	150.4	87.7	89	4.64	2.09	3.21	1.93	High	High	High	High	High	High	High	High	High	High	High	High
FALSE	High	Master Protein	Dlo_pri0113F.1_g00470.1	Dlo_pri0113F.1_g00470.1	0	43.89	13	7	24	7	690	75	6.38	546	7	0	0	1.038	1.09	1.114	1.05	1.074	1.022	1	1	1	1	1	1	94.3	97.9	102.8	105.1	2.96	7.1	2.7	1.84	High	High	High	High	High	High	High	High	High	High	High	High
FALSE	High	Master Protein	Dlo_alt0300F-003-01.1_g00090.1	Dlo_alt0300F-003-01.1_g00090.1	0	54.121	25	8	24	8	383	44.2	4.98	593	8	0	0	1.238	0.986	1.133	0.797	0.916	1.15	1	1	1	1	1	1	91.8	113.6	90.5	104.1	3.42	2.94	1.87	2.55	High	High	High	High	High	High	High	High	High	High	High	High
FALSE	High	Master Protein	Dlo_pri0105F.1_g00830.1	Dlo_pri0105F.1_g00830.1	0	48.858	25	11	24	11	523	59.4	5.52	446	11	0	0	0.945	1.046	0.959	1.107	1.016	0.917	1	1	1	1	1	1	101.3	95.7	105.9	97.2	2.51	8.11	2.43	2.8	High	High	High	High	High	High	High	High	High	High	High	High
FALSE	High	Master Protein	Dlo_pri0255F.1_g00540.1	Dlo_pri0255F.1_g00540.1	0	97.077	56	7	24	7	280	29.6	8.62	740	7	0	0	1.781	0.813	1.086	0.456	0.609	1.336	1	1	1	1	1	1	85.5	152.3	69.5	92.8	4.69	1.77	16.08	9.23	High	High	High	High	High	High	High	High	High	High	High	High
FALSE	High	Master Protein	Dlo_pri0074F.1_g00190.1	Dlo_pri0074F.1_g00190.1	0	47.721	65	8	24	8	147	16.5	4.88	575	8	0	0	0.756	0.815	0.851	1.078	1.125	1.044	1	1	1	1	1	1	116.9	88.4	95.3	99.5	1.57	1.15	1.33	0.29	High	High	High	High	High	High	High	High	High	High	High	High
FALSE	High	Master Protein	Dlo_pri0004F.1_g00860.1	Dlo_pri0004F.1_g00860.1	0	37.178	28	5	24	2	264	28.2	6.77	822	5	0	0	1.137	1.303	1.433	1.146	1.26	1.1	1	1	1	1	1	1	82.1	93.3	107	117.6	2.32	1.2	4.4	3.99	High	High	High	High	High	High	High	High	High	High	High	High
FALSE	High	Master Protein	Dlo_pri0002F.1_g07680.1	Dlo_pri0002F.1_g07680.1	0	34.032	35	7	24	1	206	23.1	5.16	634	7	0	0	0.926	1.017	0.82	1.099	0.885	0.806							106.3	98.4	108.1	87.1					Not Found	High	Not Found	Not Found	High	Not Found	Not Found	High	Not Found	Not Found	High	Not Found
FALSE	High	Master Protein	Dlo_pri0023F.1_g00200.1	Dlo_pri0023F.1_g00200.1	0	59.102	37	7	24	7	249	27.3	5.9	619	7	0	0	0.934	1.061	0.942	1.135	1.008	0.888	1	1	1	1	1	1	101.6	94.9	107.8	95.7	0.36	5.53	3.94	1.53	High	High	High	High	High	High	High	High	High	High	High	High
FALSE	High	Master Protein	Dlo_pri0355F.1_g00830.1	Dlo_pri0355F.1_g00830.1	0	61.58	3	13	24	13	6293	699.2	4.39	618	13	0	0	0.622	0.867	0.819	1.395	1.317	0.944	1	1	1	1	1	1	121	75.2	104.8	99	4.22	6.43	1.81	1.52	High	High	High	High	High	High	High	High	High	High	High	High
FALSE	High	Master Protein	Dlo_pri0056F.1_g00310.1	Dlo_pri0056F.1_g00310.1	0	55.613	13	10	24	10	953	104.1	4.83	714	10	0	0	1.234	1.066	1.127	0.864	0.914	1.058	1	1	1	1	1	1	90.4	111.5	96.3	101.9	1.52	3.02	3.35	0.63	High	High	High	High	High	High	High	High	High	High	High	High
FALSE	High	Master Protein	Dlo_alt0042F-006-01.1_g00240.1	Dlo_alt0042F-006-01.1_g00240.1	0	33.99	23	4	24	4	234	26	9.5	669	4	0	0	0.89	1.041	0.981	1.17	1.102	0.942	1	1	1	1	1	1	102.3	91	106.4	100.3	1.61	2.08	1.95	5.33	High	High	High	High	High	High	High	High	High	High	High	High
FALSE	High	Master Protein	Dlo_pri0318F.1_g00790.1	Dlo_pri0318F.1_g00790.1	0	37.064	35	7	24	1	216	23.9	7.83	654	7	0	6	1.219	1.147	0.93	0.941	0.763	0.811	1	1	1	1	1	1	93.1	113.5	106.8	86.6	0.69	0.79	0.99	1.72	High	Not Found	Not Found	High	Not Found	Not Found	High	Not Found	Not Found	High	Not Found	Not Found
FALSE	High	Master Protein	Dlo_pri0001F.1_g04180.1	Dlo_pri0001F.1_g04180.1	0	44.84	25	4	24	4	247	26.4	8.88	748	4	0	0	0.91	0.988	0.8	1.085	0.878	0.809	1	1	1	1	1	1	108.2	98.5	106.9	86.5	0.62	5.69	2.76	3.12	High	High	High	High	High	High	High	High	High	High	High	High
FALSE	High	Master Protein	Dlo_pri0259F.1_g01160.1	Dlo_pri0259F.1_g01160.1	0	43.432	50	8	24	3	216	24.4	9.82	547	8	0	5	1.129	1.01	1.083	0.895	0.96	1.073	1	1	1	1	1	1	94.8	107	95.7	102.6	2.09	1.55	2.46	0.82	High	High	High	High	High	High	High	High	High	High	High	High
FALSE	High	Master Protein	Dlo_pri0439F.1_g00450.1	Dlo_pri0439F.1_g00450.1	0	42.652	27	9	24	3	342	37.8	6.62	483	9	0	0	1.002	0.985	0.948	0.983	0.946	0.962	1	1	1	1	1	1	101.6	101.8	100.1	96.4	1.15	0.88	0.88	2.59	High	High	High	High	High	High	High	High	High	High	High	High
FALSE	High	Master Protein	Dlo_pri0053F.1_g03320.1	Dlo_pri0053F.1_g03320.1	0	42.206	38	6	24	3	236	25.2	5.41	813	6	0	3	0.989	1.068	1.063	1.08	1.074	0.995	1	1	1	1	1	1	97.1	96	103.7	103.2	1.46	0.73	1.03	0.36	High	High	High	High	High	High	High	High	High	High	High	High
FALSE	High	Master Protein	Dlo_pri0002F.1_g03770.1	Dlo_pri0002F.1_g03770.1	0	51.674	50	8	24	8	221	23.2	9.19	639	8	0	0	1.032	0.792	0.819	0.767	0.794	1.034	1	1	1	1	1	1	109.8	113.3	87	89.9	4.99	4.09	13.23	3.08	High	High	High	High	High	High	High	High	High	High	High	High
FALSE	High	Master Protein	Dlo_pri0072F.1_g00440.1	Dlo_pri0072F.1_g00440.1	0	30.937	24	4	24	4	148	16.2	7.43	572	4	0	0	0.987	1.082	1.043	1.097	1.057	0.963	1	1	1	1	1	1	97.3	96	105.3	101.4	4.4	1.81	4.35	3.48	High	High	High	High	High	High	High	High	High	High	High	High
FALSE	High	Master Protein	Dlo_pri0209F.1_g01640.1	Dlo_pri0209F.1_g01640.1	0	42.468	32	7	24	3	206	23.6	10.49	569	7	0	4	1.104	1.037	0.975	0.939	0.883	0.941	1	1	1	1	1	1	97.2	107.3	100.7	94.8	2.09	0.86	3.89	3.21	High	High	High	High	High	High	High	High	High	High	High	High
FALSE	High	Master Protein	Dlo_pri0300F.1_g00260.1	Dlo_pri0300F.1_g00260.1	0	52.914	18	7	24	7	501	56	5.71	631	7	0	0	1.244	0.996	1.474	0.801	1.185	1.479	1	1	1	1	1	1	84.9	105.5	84.5	125.1	1.97	1.63	3.25	3.5	High	High	High	High	High	High	High	High	High	High	High	High
FALSE	High	Master Protein	Dlo_alt0004F-042-01.1_g00030.1	Dlo_alt0004F-042-01.1_g00030.1	0	43.614	13	7	24	7	653	71.9	8.27	546	7	0	0	0.852	1.139	1.167	1.337	1.37	1.025	1	1	1	1	1	1	96.2	82	109.6	112.3	1.46	4.41	3.23	1.26	High	High	High	High	High	High	High	High	High	High	High	High
FALSE	High	Master Protein	Dlo_pri0028F.1_g04840.1	Dlo_pri0028F.1_g04840.1	0	53.06	23	7	24	7	461	50.6	6.54	533	7	0	0	0.936	0.964	0.997	1.03	1.065	1.034	1	1	1	1	1	1	102.6	96.1	98.9	102.3	2.36	1.64	3.85	1.4	High	High	High	High	High	High	High	High	High	High	High	High
FALSE	High	Master Protein	Dlo_pri0318F.1_g00660.1	Dlo_pri0318F.1_g00660.1	0	38.015	19	6	23	6	313	34.3	10.02	506	6	0	0	0.997	0.856	1.094	0.859	1.097	1.277	1	1	1	1	1	1	101.3	101.1	86.8	110.8	6.31	3.69	5.74	2.15	High	High	High	High	High	High	High	High	High	High	High	High
FALSE	High	Master Protein	Dlo_pri0021F.1_g07930.1	Dlo_pri0021F.1_g07930.1	0	29.572	20	5	23	5	318	35.2	8.16	537	5	0	0	1.096	0.957	1.002	0.874	0.915	1.047	1	1	1	1	1	1	98.6	108.1	94.4	98.9	2.6	1.52	3.27	4.1	High	High	High	High	High	High	High	High	High	High	High	High
FALSE	High	Master Protein	Dlo_pri1054F.1_g00040.1	Dlo_pri1054F.1_g00040.1	0	23.114	16	4	23	4	253	27.7	10.24	611	4	0	0	1.523	0.315	1.141	0.207	0.749	3.623	0.224847	0.00235019	1	0.000102922	0.93169	0.000680428	100.5	153.1	31.7	114.7	0.95	0.69	0.96	0.8	High	High	High	High	High	High	High	High	High	High	High	High
FALSE	High	Master Protein	Dlo_pri0331F.1_g01100.1	Dlo_pri0331F.1_g01100.1	0	58.36	27	12	23	12	611	70.3	8.24	555	12	0	0	0.838	1.005	0.88	1.2	1.051	0.876	1	1	1	1	1	1	107.4	90	108	94.6	0.88	2.4	3.91	2.92	High	High	High	High	High	High	High	High	High	High	High	High
FALSE	High	Master Protein	Dlo_pri0179F.1_g00030.1	Dlo_pri0179F.1_g00030.1	0	48.956	37	6	23	6	238	26.5	7.02	878	6	0	0	0.911	1.002	0.805	1.099	0.884	0.804	1	1	1	1	1	1	107.6	98	107.8	86.6	0.63	5.04	4.79	1.92	High	High	High	High	High	High	High	High	High	High	High	High
FALSE	High	Master Protein	Dlo_pri0010F.1_g05990.1	Dlo_pri0010F.1_g05990.1	0	71.383	25	11	23	3	496	53.3	7.36	671	11	0	0	1.196	0.958	1.012	0.8	0.846	1.057	1	1	1	1	1	1	96	114.9	91.9	97.2	9.08	0.78	7.64	2.66	High	High	Not Found	High	High	Not Found	High	High	Not Found	High	High	Not Found
FALSE	High	Master Protein	Dlo_pri0020F.1_g01250.1	Dlo_pri0020F.1_g01250.1	0	30.731	15	6	23	1	502	53.3	6.18	553	6	0	0	0.792	0.912	0.647	1.151	0.817	0.709	1	1	1	1	1	1	119.4	94.6	108.9	77.2	4.49	4.93	4.86	4.44	High	High	High	High	High	High	High	High	High	High	High	High
FALSE	High	Master Protein	Dlo_pri0462F.1_g00230.1	Dlo_pri0462F.1_g00230.1	0	66.52	30	8	23	8	411	43.6	7.77	742	8	0	0	0.991	0.983	0.886	0.992	0.894	0.902	1	1	1	1	1	1	103.6	102.7	101.9	91.8	1.83	5.93	4.66	1.26	High	High	High	High	High	High	High	High	High	High	High	High
FALSE	High	Master Protein	Dlo_pri0034F.1_g00330.1	Dlo_pri0034F.1_g00330.1	0	37.841	21	5	23	5	278	31.3	6.39	771	5	0	0	0.948	1.023	0.876	1.08	0.925	0.856	1	1	1	1	1	1	104	98.5	106.4	91.1	1.24	0.82	1.05	2.15	High	High	High	High	High	High	High	High	High	High	High	High
FALSE	High	Master Protein	Dlo_pri0015F.1_g04690.1	Dlo_pri0015F.1_g04690.1	0	38.184	46	7	23	3	158	17.1	6.42	485	7	0	0	0.528	0.918	0.456	1.738	0.863	0.497	1	1	1	1	1	1	137.8	72.8	126.5	62.8	6.15	4.22	3.8	13	High	High	High	High	High	High	High	High	High	High	High	High
FALSE	High	Master Protein	Dlo_alt0151F-012-01.1_g00020.1	Dlo_alt0151F-012-01.1_g00020.1	0	49.118	13	8	23	7	799	88.1	6.8	711	8	0	1	0.788	1.02	0.88	1.294	1.117	0.863	1	1	1	1	1	1	108.4	85.5	110.6	95.5	2.05	3.41	2.6	2.02	High	High	High	High	High	High	High	High	High	High	High	High
FALSE	High	Master Protein	Dlo_pri0284F.1_g00530.1	Dlo_pri0284F.1_g00530.1	0	14.416	24	3	23	2	131	14.1	4.7	540	3	0	0	0.692	0.845	0.762	1.222	1.101	0.902	1	1	1	1	1	1	121.3	83.9	102.5	92.4	1.71	3.92	0.74	2.28	High	High	High	High	High	High	High	High	High	High	High	High
FALSE	High	Master Protein	Dlo_pri0055F.1_g02070.1	Dlo_pri0055F.1_g02070.1	0	41.439	22	9	23	9	500	55.7	7.08	499	9	0	0	1.918	1.136	1.589	0.592	0.828	1.398	0.672543	1	1	1	1	1	70.9	136	80.5	112.6	0.94	2.36	1.91	1.37	High	High	High	High	High	High	High	High	High	High	High	High
FALSE	High	Master Protein	Dlo_pri0073F.1_g01260.1	Dlo_pri0073F.1_g01260.1	0	53.401	40	6	23	6	220	23.9	8.54	610	6	0	0	1.156	0.926	0.917	0.801	0.793	0.99	1	1	1	1	1	1	100	115.7	92.6	91.7	2.36	2.02	1.23	0.47	High	High	High	High	High	High	High	High	High	High	High	High
FALSE	High	Master Protein	Dlo_pri0026F.1_g00220.1	Dlo_pri0026F.1_g00220.1	0	38.761	42	7	23	7	178	21.5	10.42	747	7	0	0	1.02	1.026	0.974	1.006	0.955	0.949	1	1	1	1	1	1	99.5	101.5	102.1	96.9	2.07	1.01	3.2	2.19	High	High	High	High	High	High	High	High	High	High	High	High
FALSE	High	Master Protein	Dlo_pri0362F.1_g00790.1	Dlo_pri0362F.1_g00790.1	0	58.084	22	8	23	8	494	51.6	8.51	829	8	0	0	1.171	0.919	1.336	0.785	1.141	1.453	1	1	1	1	1	1	90.4	105.8	83.1	120.7	7.65	6.7	9.08	7.14	High	High	High	High	High	High	High	High	High	High	High	High
FALSE	High	Master Protein	Dlo_pri0246F.1_g00260.1	Dlo_pri0246F.1_g00260.1	0	54.963	16	9	23	9	766	84.3	6.05	662	9	0	0	0.879	0.941	0.883	1.07	1.004	0.938	1	1	1	1	1	1	108	95	101.6	95.4	3.08	3.16	11.66	7.34	High	High	High	High	High	High	High	High	High	High	High	High
FALSE	High	Master Protein	Dlo_pri0088F.1_g02570.1	Dlo_pri0088F.1_g02570.1	0	43.848	22	6	23	5	418	46.5	6.48	657	6	0	1	0.79	0.961	0.777	1.217	0.984	0.809	1	1	1	1	1	1	113.4	89.5	108.9	88.1	0.8	3.09	0.66	3.14	High	High	High	High	High	High	High	High	High	High	High	High
FALSE	High	Master Protein	Dlo_pri0414F.1_g00860.1	Dlo_pri0414F.1_g00860.1	0	19.604	18	4	23	1	194	22	9.67	481	4	0	0	1.162	0.942	1.107	0.811	0.953	1.176	1	1	1	1	1	1	95	110.4	89.5	105.2	2.61	7.42	6.09	1.39	High	High	High	High	High	High	High	High	High	High	High	High
FALSE	High	Master Protein	Dlo_pri0799F.1_g00140.1	Dlo_pri0799F.1_g00140.1	0	47.539	23	7	23	7	408	45	7.5	494	7	0	0	1.007	1.02	0.928	1.014	0.922	0.91	1	1	1	1	1	1	101.1	101.8	103.2	93.9	0.64	0.57	0.4	0.34	High	High	High	High	High	High	High	High	High	High	High	High
FALSE	High	Master Protein	Dlo_alt0502F-001-01.1_g00080.1	Dlo_alt0502F-001-01.1_g00080.1	0	38.316	16	7	22	7	573	60.5	6.89	511	7	0	0	1.091	0.988	0.96	0.906	0.88	0.972	1	1	1	1	1	1	99.1	108	97.8	95.1	1.79	1.59	1.2	1.49	High	High	High	High	High	High	High	High	High	High	High	High
FALSE	High	Master Protein	Dlo_pri0580F.1_g00250.1	Dlo_pri0580F.1_g00250.1	0	24.241	19	4	22	4	313	33.2	5.35	564	4	0	0	0.644	0.827	1.384	1.284	2.149	1.673	1	1	1	1	1	1	103.8	66.8	85.8	143.6	1.55	6.55	6.38	8.53	High	High	High	High	High	High	High	High	High	High	High	High
FALSE	High	Master Protein	Dlo_pri0597F.1_g00280.1	Dlo_pri0597F.1_g00280.1	0	44.426	25	6	22	6	345	39.3	7.15	575	6	0	0	0.864	0.944	1.141	1.093	1.321	1.209	1	1	1	1	1	1	101.3	87.5	95.6	115.6	2.84	3.19	2.05	0.59	High	High	High	High	High	High	High	High	High	High	High	High
FALSE	High	Master Protein	Dlo_alt0403F-002-01.1_g00030.1	Dlo_alt0403F-002-01.1_g00030.1	0	61.438	29	8	22	5	382	42	7.11	723	8	0	2	0.687	0.986	0.742	1.435	1.08	0.752	1	1	1	1	1	1	117.1	80.5	115.5	86.9	0.79	1.58	1.48	1.34	High	High	High	High	High	High	High	High	High	High	High	High
FALSE	High	Master Protein	Dlo_pri0565F.1_g00470.1	Dlo_pri0565F.1_g00470.1	0	42.079	19	6	22	4	467	51.3	6.02	570	6	0	0	1.01	0.896	0.992	0.887	0.982	1.107	1	1	1	1	1	1	102.6	103.7	92	101.8	2.8	1.34	3.5	4.66	High	High	High	High	High	High	High	High	High	High	High	High
FALSE	High	Master Protein	Dlo_pri0011F-1.1_g02390.1	Dlo_pri0011F-1.1_g02390.1	0	39.955	14	7	22	5	721	79.9	5.33	586	7	0	0	0.989	1.041	0.922	1.053	0.933	0.886	1	1	1	1	1	1	101.2	100.1	105.4	93.4	3.02	4.84	7.4	6.45	High	High	Not Found	High	High	Not Found	High	High	Not Found	High	High	Not Found
FALSE	High	Master Protein	Dlo_pri0134F.1_g02520.1	Dlo_pri0134F.1_g02520.1	0	39.327	19	10	22	10	647	72.9	8.12	475	10	0	0	0.976	0.953	0.978	0.976	1.002	1.026	1	1	1	1	1	1	102.4	99.9	97.6	100.1	0.53	4.81	5.4	8.92	High	High	High	High	High	High	High	High	High	High	High	High
FALSE	High	Master Protein	Dlo_pri0502F.1_g00460.1	Dlo_pri0502F.1_g00460.1	0	32.983	31	6	22	1	213	23.6	7.11	633	6	0	0	1.097	0.954	0.775	0.87	0.707	0.812							104.6	114.7	99.8	81					High	High	Not Found	High	High	Not Found	High	High	Not Found	High	High	Not Found
FALSE	High	Master Protein	Dlo_pri0030F.1_g04190.1	Dlo_pri0030F.1_g04190.1	0	31.397	27	6	22	1	216	23.9	8.22	576	6	0	0	1.187	1.006	0.997	0.847	0.84	0.991	1	1	1	1	1	1	95.5	113.3	96	95.2	10.52	7.22	5.19	2.55	High	High	High	High	High	High	High	High	High	High	High	High
FALSE	High	Master Protein	Dlo_pri0098F.1_g00900.1	Dlo_pri0098F.1_g00900.1	0	56.883	24	7	22	7	411	47	5.53	705	7	0	0	1.093	1.253	0.908	1.147	0.831	0.725	1	1	1	1	1	1	94	102.7	117.8	85.4	1.89	1.6	0.85	1.34	High	High	High	High	High	High	High	High	High	High	High	High
FALSE	High	Master Protein	Dlo_pri0036F.1_g01060.1	Dlo_pri0036F.1_g01060.1	0	39.31	43	6	22	3	160	17.5	5.99	477	6	0	4	0.98	0.85	0.887	0.867	0.904	1.043	1	1	1	1	1	1	107.6	105.5	91.5	95.4	3.53	7.05	6.61	2.82	High	High	High	High	High	High	High	High	High	High	High	High
FALSE	High	Master Protein	Dlo_pri0173F.1_g00120.1	Dlo_pri0173F.1_g00120.1	0	51.612	32	7	22	7	312	35.2	4.98	500	7	0	0	1.073	1.001	1.28	0.933	1.193	1.278	1	1	1	1	1	1	91.9	98.6	92	117.6	3.61	1.41	1.63	4.24	High	High	High	High	High	High	High	High	High	High	High	High
FALSE	High	Master Protein	Dlo_pri0048F.1_g00600.1	Dlo_pri0048F.1_g00600.1	0	51.695	29	9	22	6	399	44.3	8.16	505	9	0	0	0.878	1.078	1.157	1.227	1.317	1.073	1	1	1	1	1	1	97.3	85.4	104.8	112.5	7.15	13.03	11.26	6.5	High	High	High	High	High	High	High	High	High	High	High	High
FALSE	High	Master Protein	Dlo_pri0055F.1_g00800.1	Dlo_pri0055F.1_g00800.1	0	39.805	61	5	22	5	95	10.7	8.4	587	5	0	0	0.851	0.861	0.881	1.011	1.035	1.023	1	1	1	1	1	1	111.3	94.8	95.8	98	2.03	2.74	2.36	1.67	High	High	High	High	High	High	High	High	High	High	High	High
FALSE	High	Master Protein	Dlo_pri0233F.1_g00970.1	Dlo_pri0233F.1_g00970.1	0	38.391	43	10	22	10	261	29.2	9.66	478	10	0	0	1.276	1.093	1.123	0.856	0.88	1.028	1	1	1	1	1	1	89.1	113.6	97.3	100	2.55	2.47	2.76	1.98	High	High	High	High	High	High	High	High	High	High	High	High
FALSE	High	Master Protein	Dlo_pri0043F.1_g01410.1	Dlo_pri0043F.1_g01410.1	0	64.946	18	10	22	1	750	82.2	5.68	442	10	0	0	1.109	0.93	1.14	0.838	1.027	1.226	1	1	1	1	1	1	95.7	106.2	89	109.1	2.45	3.24	2.72	3.23	High	High	High	High	High	High	High	High	High	High	High	High
FALSE	High	Master Protein	Dlo_pri0070F.1_g02330.1	Dlo_pri0070F.1_g02330.1	0	19.548	19	6	22	1	284	31.1	5.54	378	6	0	0	1.639	1.242	1.29	0.758	0.788	1.039	1	1	1	1	1	1	77.4	126.8	96.1	99.8	0.06	1.63	2.4	0.19	High	Not Found	High	High	Not Found	High	High	Not Found	High	High	Not Found	High
FALSE	High	Master Protein	Dlo_pri0002F.1_g00410.1	Dlo_pri0002F.1_g00410.1	0	34.821	17	9	22	9	542	61.1	9.01	373	9	0	0	1.099	0.914	1.174	0.831	1.068	1.285	1	1	1	1	1	1	95.5	105	87.3	112.2	2.58	2.25	2.03	3.3	High	High	High	High	High	High	High	High	High	High	High	High
FALSE	High	Master Protein	Dlo_pri0006F.1_g04650.1	Dlo_pri0006F.1_g04650.1	0	23.67	45	6	22	6	156	17.7	9.79	607	6	0	0	0.67	1.054	0.932	1.574	1.391	0.884	1	1	1	1	1	1	109.4	73.3	115.4	102	2.98	11.21	4	2.84	High	High	High	High	High	High	High	High	High	High	High	High
FALSE	High	Master Protein	Dlo_pri0020F.1_g01090.1	Dlo_pri0020F.1_g01090.1	0	29.162	12	7	22	2	606	65.8	6.49	485	7	0	5	0.845	0.901	0.816	1.067	0.966	0.905	1	1	1	1	1	1	112.3	94.8	101.2	91.6	1.64	1.77	3.53	1.62	High	Not Found	High	High	Not Found	High	High	Not Found	High	High	Not Found	High
FALSE	High	Master Protein	Dlo_pri0473F.1_g00670.1	Dlo_pri0473F.1_g00670.1	0	48.369	19	9	22	9	659	71.7	7.81	533	9	0	0	0.878	0.978	0.826	1.114	0.94	0.844	1	1	1	1	1	1	108.6	95.4	106.3	89.7	2.57	3.61	3.19	3.03	High	High	High	High	High	High	High	High	High	High	High	High
FALSE	High	Master Protein	Dlo_alt0015F-002-01.1_g00150.1	Dlo_alt0015F-002-01.1_g00150.1	0	58.606	24	11	22	5	623	69	5.27	639	11	0	6	1.098	1.013	1.059	0.923	0.965	1.045	1	1	1	1	1	1	95.9	105.3	97.2	101.6	1.19	1.92	0.86	1.23	High	High	High	High	High	High	High	High	High	High	High	High
FALSE	High	Master Protein	Dlo_alt0061F-002-01.1_g00020.1	Dlo_alt0061F-002-01.1_g00020.1	0	60.666	19	8	22	8	594	65.3	8.98	621	8	0	0	0.931	0.909	1.008	0.977	1.084	1.109	1	1	1	1	1	1	103.9	96.7	94.5	104.8	2.53	1.48	1	3.6	High	High	High	High	High	High	High	High	High	High	High	High
FALSE	High	Master Protein	Dlo_pri0031F.1_g02090.1	Dlo_pri0031F.1_g02090.1	0	49.249	51	10	22	8	224	24.7	6.8	638	10	0	2	1.035	0.965	0.967	0.933	0.935	1.002	1	1	1	1	1	1	100.8	104.3	97.3	97.5	2.11	1.9	0.41	0.56	High	High	High	High	High	High	High	High	High	High	High	High
FALSE	High	Master Protein	Dlo_pri0103F.1_g00480.1	Dlo_pri0103F.1_g00480.1	0	37.686	23	7	22	7	324	35.2	7.99	483	7	0	0	1.172	0.977	1.132	0.833	0.965	1.158	1	1	1	1	1	1	93.4	109.5	91.3	105.7	1.42	3.06	3.5	2.7	High	High	High	High	High	High	High	High	High	High	High	High
FALSE	High	Master Protein	Dlo_pri0015F.1_g05630.1	Dlo_pri0015F.1_g05630.1	0	41.751	29	9	22	9	328	35.5	6.8	456	9	0	0	1.108	1.108	1.128	0.999	1.018	1.019	1	1	1	1	1	1	92.1	102	102	103.9	0.43	0.68	0.41	0.84	High	High	High	High	High	High	High	High	High	High	High	High
FALSE	High	Master Protein	Dlo_pri0115F.1_g01870.1	Dlo_pri0115F.1_g01870.1	0	34.623	39	7	22	3	242	27.1	5.3	362	7	0	0	0.877	0.897	0.998	1.023	1.138	1.113	1	1	1	1	1	1	106	93	95.1	105.9	1.87	3.16	3.22	0.8	High	High	High	High	High	High	High	High	High	High	High	High
FALSE	High	Master Protein	Dlo_pri0229F.1_g01850.1	Dlo_pri0229F.1_g01850.1	0	50.806	39	8	22	4	262	28.8	8.4	490	8	0	1	1.215	1.147	1.05	0.944	0.864	0.916	1	1	1	1	1	1	90.6	110.1	104	95.2	1.75	1.16	2.85	0.18	High	High	High	High	High	High	High	High	High	High	High	High
FALSE	High	Master Protein	Dlo_pri0043F.1_g02440.1	Dlo_pri0043F.1_g02440.1	0	31.763	29	6	22	6	296	32.6	9.16	557	6	0	0	0.802	0.972	0.833	1.212	1.039	0.857	1	1	1	1	1	1	110.9	88.9	107.8	92.4	1.2	4.82	4.02	1.35	High	High	High	High	High	High	High	High	High	High	High	High
FALSE	High	Master Protein	Dlo_alt0199F-004-01.1_g00080.1	Dlo_alt0199F-004-01.1_g00080.1	0	26.741	26	7	22	3	309	34.9	6.27	456	7	0	4	1.037	0.952	1.004	0.918	0.968	1.054	1	1	1	1	1	1	100.2	103.9	95.4	100.5	2.37	3.65	1.01	0.75	High	High	High	High	High	High	High	High	High	High	High	High
FALSE	High	Master Protein	Dlo_pri0415F.1_g00960.1	Dlo_pri0415F.1_g00960.1	0	32.415	48	5	21	5	115	11.5	6.34	542	5	0	0	0.702	1.033	1.371	1.473	1.954	1.327	1	1	1	1	1	1	97.4	68.4	100.7	133.6	1.57	7.89	0.96	3.85	High	High	High	High	High	High	High	High	High	High	High	High
FALSE	High	Master Protein	Dlo_pri0036F.1_g01860.1	Dlo_pri0036F.1_g01860.1	0	45.637	24	7	21	2	423	47.5	6.76	597	7	0	0	0.954	1.079	1.063	1.131	1.114	0.985	1	1	1	1	1	1	97.7	93.2	105.4	103.8	2.35	9.65	6.43	3.11	High	High	High	High	High	High	High	High	High	High	High	High
FALSE	High	Master Protein	Dlo_pri0466F.1_g00540.1	Dlo_pri0466F.1_g00540.1	0	66.64	16	10	21	10	864	96.9	6.52	662	10	0	0	0.95	1.059	0.984	1.115	1.036	0.929	1	1	1	1	1	1	100.2	95.1	106.1	98.6	2.54	3.85	6.08	4.98	High	High	High	High	High	High	High	High	High	High	High	High
FALSE	High	Master Protein	Dlo_alt0074F-008-01.1_g00020.1	Dlo_alt0074F-008-01.1_g00020.1	0	39.747	27	9	21	9	415	47	4.94	483	9	0	0	0.919	0.971	0.865	1.057	0.942	0.891	1	1	1	1	1	1	106.5	97.9	103.4	92.2	4.28	4.28	1.9	4.06	High	High	High	High	High	High	High	High	High	High	High	High
FALSE	High	Master Protein	Dlo_pri0042F.1_g01470.1	Dlo_pri0042F.1_g01470.1	0	31.976	16	6	21	6	461	48.9	5.2	462	6	0	0	1.146	0.994	1.626	0.868	1.419	1.635	1	1	1	1	1	1	83.9	96.2	83.5	136.5	3.59	1.12	3	3.12	High	High	High	High	High	High	High	High	High	High	High	High
FALSE	High	Master Protein	Dlo_pri0088F.1_g03320.1	Dlo_pri0088F.1_g03320.1	0	36.3	73	4	21	4	86	9.1	5.4	577	4	0	0	0.623	0.765	0.587	1.229	0.942	0.766	0.235182	1	0.241231	1	1	1	134.5	83.7	102.9	78.9	6.9	2.1	2.29	10.86	High	High	High	High	High	High	High	High	High	High	High	High
FALSE	High	Master Protein	Dlo_pri0952F.1_g00270.1	Dlo_pri0952F.1_g00270.1	0	57.532	24	8	21	5	582	65.1	7.27	564	8	0	0	1.565	0.785	2.105	0.501	1.345	2.683	1	1	0.306297	0.380393	1	0.0941495	73.3	114.8	57.5	154.3	0.23	0.36	6.19	2.34	High	High	High	High	High	High	High	High	High	High	High	High
FALSE	High	Master Protein	Dlo_pri0149F.1_g00800.1	Dlo_pri0149F.1_g00800.1	0	45.031	14	3	21	1	322	35.6	6.35	719	3	0	0	0.788	0.886	0.602	1.124	0.764	0.68							122.1	96.2	108.2	73.5					Not Found	High	Not Found	Not Found	High	Not Found	Not Found	High	Not Found	Not Found	High	Not Found
FALSE	High	Master Protein	Dlo_alt0163F-008-01-1.1_g00050.1	Dlo_alt0163F-008-01-1.1_g00050.1	0	31.202	27	3	21	3	187	20.5	6.11	696	3	0	0	1.184	0.91	1.309	0.769	1.106	1.439	1	1	1	1	1	1	90.8	107.6	82.7	118.9	2.8	1.68	1.01	2.79	High	High	High	High	High	High	High	High	High	High	High	High
FALSE	High	Master Protein	Dlo_pri0957F-1.1_g00100.1	Dlo_pri0957F-1.1_g00100.1	0	41.45	18	8	21	8	501	54.6	6.9	588	8	0	0	1.194	0.867	1.102	0.726	0.923	1.271	1	1	1	1	1	1	96.1	114.7	83.3	105.9	4.47	7.55	4.72	0.26	High	High	High	High	High	High	High	High	High	High	High	High
FALSE	High	Master Protein	Dlo_pri0016F.1_g06730.1	Dlo_pri0016F.1_g06730.1	0	46.453	26	10	21	10	478	51.6	7.43	544	10	0	0	1.066	1.165	0.926	1.093	0.869	0.795	1	1	1	1	1	1	96.2	102.6	112.1	89.1	2.52	2.48	4.66	4.41	High	High	High	High	High	High	High	High	High	High	High	High
FALSE	High	Master Protein	Dlo_pri0334F.1_g01090.1	Dlo_pri0334F.1_g01090.1	0	32.913	31	5	21	2	203	22.6	5.71	598	5	0	1	1.112	1.029	0.915	0.926	0.823	0.889	1	1	1	1	1	1	98.6	109.7	101.5	90.2	2.54	2.71	1.53	6.06	High	High	High	High	High	High	High	High	High	High	High	High
FALSE	High	Master Protein	Dlo_pri0830F.1_g00210.1	Dlo_pri0830F.1_g00210.1	0	38.772	33	5	21	3	224	25.5	5.81	602	5	0	2	1.052	0.979	0.929	0.931	0.884	0.949	1	1	1	1	1	1	101	106.2	98.9	93.9	2.71	1.88	1.82	1.81	High	High	High	High	High	High	High	High	High	High	High	High
FALSE	High	Master Protein	Dlo_pri0290F.1_g01470.1	Dlo_pri0290F.1_g01470.1	0	59.739	25	9	21	9	531	60.3	6.99	740	9	0	0	1.314	1.259	1.26	0.958	0.959	1.001	1	1	1	1	1	1	82.8	108.7	104.2	104.3	2.01	0.96	2.17	1.18	High	High	High	High	High	High	High	High	High	High	High	High
FALSE	High	Master Protein	Dlo_pri0077F.1_g00650.1	Dlo_pri0077F.1_g00650.1	0	40.509	15	8	21	3	566	63.1	6.06	526	8	0	5	1.018	1.079	0.994	1.06	0.976	0.921	1	1	1	1	1	1	97.8	99.6	105.5	97.2	6.53	5.12	2.3	4.32	High	High	High	High	High	High	High	High	High	High	High	High
FALSE	High	Master Protein	Dlo_pri0139F.1_g00700.1	Dlo_pri0139F.1_g00700.1	0	54.2	40	8	21	8	284	31.9	5.44	592	8	0	0	0.932	0.973	0.836	1.044	0.897	0.859	1	1	1	1	1	1	106.9	99.7	104	89.4	1.04	2	2.96	4.36	High	High	High	High	High	High	High	High	High	High	High	High
FALSE	High	Master Protein	Dlo_pri0057F.1_g02480.1	Dlo_pri0057F.1_g02480.1	0	31.111	21	6	21	2	337	38.2	6.48	542	6	0	0	1.096	0.97	0.984	0.885	0.898	1.014	1	1	1	1	1	1	98.8	108.2	95.8	97.2	4.71	3.43	3.02	5.89	High	High	High	High	High	High	High	High	High	High	High	High
FALSE	High	Master Protein	Dlo_pri0067F.1_g01990.1	Dlo_pri0067F.1_g01990.1	0	30.472	33	6	21	6	208	22.3	9.35	587	6	0	0	0.754	0.983	0.889	1.304	1.179	0.904	0.0745686	1	1	0.0615387	0.71231	1	110.3	83.2	108.5	98.1	1.42	3.62	1.34	0.89	High	High	High	High	High	High	High	High	High	High	High	High
FALSE	High	Master Protein	Dlo_pri0320F.1_g00550.1	Dlo_pri0320F.1_g00550.1	0	38.435	10	7	21	1	1004	110.8	6.02	510	7	0	0	1.204	0.95	1.191	0.789	0.989	1.253							92.1	110.8	87.5	109.6					High	Not Found	Not Found	High	Not Found	Not Found	High	Not Found	Not Found	High	Not Found	Not Found
FALSE	High	Master Protein	Dlo_pri0439F.1_g00420.1	Dlo_pri0439F.1_g00420.1	0	50.746	32	10	21	4	345	37.9	6.15	472	10	0	7	1.176	1.118	1.024	0.951	0.871	0.916	1	1	1	1	1	1	92.6	108.9	103.5	94.9	1.4	5.38	3.54	1.34	High	High	High	High	High	High	High	High	High	High	High	High
FALSE	High	Master Protein	Dlo_pri0611F.1_g00380.1	Dlo_pri0611F.1_g00380.1	0	33.209	19	5	21	5	324	35.5	7.2	656	5	0	0	1.617	1.008	1.072	0.623	0.663	1.064	0.036657	1	1	0.0213675	0.0731189	1	85.2	137.7	85.8	91.3	2.68	3.02	3.15	0.88	High	High	High	High	High	High	High	High	High	High	High	High
FALSE	High	Master Protein	Dlo_pri0002F.1_g06110.1	Dlo_pri0002F.1_g06110.1	0	41.73	16	8	21	3	552	62	6.06	484	8	0	0	0.896	1.063	0.934	1.187	1.043	0.879	1	1	1	1	1	1	102.7	92	109.2	96	4.42	6.64	4.85	4.06	High	High	High	High	High	High	High	High	High	High	High	High
FALSE	High	Master Protein	Dlo_pri0105F.1_g01450.1	Dlo_pri0105F.1_g01450.1	0	28.587	20	6	21	2	369	39.7	5.83	424	6	0	4	1.233	1.031	1.04	0.836	0.844	1.009	1	1	1	1	1	1	92.9	114.6	95.8	96.7	1.76	2.32	2	2.91	High	High	High	High	High	High	High	High	High	High	High	High
FALSE	High	Master Protein	Dlo_alt0240F-005-01.1_g00140.1	Dlo_alt0240F-005-01.1_g00140.1	0	31.684	25	6	21	2	276	29.4	8.75	627	6	0	0	1.093	0.934	0.914	0.855	0.837	0.979	1	1	1	1	1	1	101.5	110.9	94.8	92.8	0.79	3.21	1.31	2.69	High	High	High	High	High	High	High	High	High	High	High	High
FALSE	High	Master Protein	Dlo_pri0230F.1_g00760.1	Dlo_pri0230F.1_g00760.1	0	22.517	18	4	20	4	217	24.8	6.23	504	4	0	0	0.927	0.715	0.853	0.771	0.92	1.193	1	0.39913	1	0.383037	1	1	114.4	106.1	81.8	97.6	0.22	2.54	1.96	1.22	High	High	High	High	High	High	High	High	High	High	High	High
FALSE	High	Master Protein	Dlo_pri0101F.1_g02880.1	Dlo_pri0101F.1_g02880.1	0	30.648	18	8	20	8	456	50.2	6.65	440	8	0	0	1.017	1.036	1.626	1.019	1.598	1.569	1	1	0.970958	1	0.881012	1	85.5	87	88.6	139	0.82	10.73	2.45	6.27	High	High	High	High	High	High	High	High	High	High	High	High
FALSE	High	Master Protein	Dlo_pri0414F.1_g00670.1	Dlo_pri0414F.1_g00670.1	0	30.547	30	5	20	2	207	23.8	11.09	609	5	0	3	1.381	1.074	0.9	0.777	0.652	0.839	1	1	1	1	1	1	91.8	126.8	98.6	82.7	2.79	3.52	1.79	4.2	High	High	High	High	High	High	High	High	High	High	High	High
FALSE	High	Master Protein	Dlo_pri0046F.1_g01420.1	Dlo_pri0046F.1_g01420.1	0	36.899	22	4	20	4	204	22.9	10.37	506	4	0	0	1.208	0.883	0.946	0.731	0.783	1.071	1	1	1	1	1	1	99.1	119.7	87.5	93.7	4.08	1.06	3.74	3.08	High	High	High	High	High	High	High	High	High	High	High	High
FALSE	High	Master Protein	Dlo_pri0138F.1_g00580.1	Dlo_pri0138F.1_g00580.1	0	23.879	18	4	20	4	280	30.9	6.19	482	4	0	0	1.219	1.034	1.227	0.849	1.007	1.186	1	1	1	1	1	1	89.3	108.8	92.3	109.5	3.04	1.56	1.63	0.02	High	High	High	High	High	High	High	High	High	High	High	High
FALSE	High	Master Protein	Dlo_pri0194F.1_g01220.1	Dlo_pri0194F.1_g01220.1	0	37.812	30	9	20	9	354	38.5	7.83	440	9	0	0	0.921	1.018	0.804	1.105	0.874	0.79	1	1	1	1	1	1	106.9	98.4	108.8	86	3.39	1.57	2.12	5.02	High	High	High	High	High	High	High	High	High	High	High	High
FALSE	High	Master Protein	Dlo_pri0018F.1_g01310.1	Dlo_pri0018F.1_g01310.1	0	29.559	20	4	20	1	233	26.1	7.25	462	4	0	0	1.01	0.943	0.851	0.934	0.842	0.902	1	1	1	1	1	1	105.1	106.2	99.2	89.5	1.53	1.02	1.53	2.14	High	High	High	High	High	High	High	High	High	High	High	High
FALSE	High	Master Protein	Dlo_pri0140F.1_g02790.1	Dlo_pri0140F.1_g02790.1	0	36.572	40	5	20	5	148	16.6	9.35	511	5	0	0	0.965	1.004	1.028	1.041	1.065	1.023	1	1	1	1	1	1	100.1	96.5	100.5	102.9	2.16	3.71	3.4	2.26	High	High	High	High	High	High	High	High	High	High	High	High
FALSE	High	Master Protein	Dlo_alt0159F-002-01.1_g00090.1	Dlo_alt0159F-002-01.1_g00090.1	0	50.666	14	8	20	8	853	90.9	7.93	569	8	0	0	1.042	1.138	1.071	1.092	1.027	0.941	1	1	1	1	1	1	94.1	98.1	107.1	100.8	10.17	2.51	4.18	4.81	High	High	High	High	High	High	High	High	High	High	High	High
FALSE	High	Master Protein	Dlo_pri0246F.1_g00400.1	Dlo_pri0246F.1_g00400.1	0	41.09	22	7	20	6	343	37.6	6.73	583	7	0	1	0.857	0.9	0.933	1.051	1.089	1.036	1	1	1	1	1	1	108.4	92.9	97.6	101.1	0.87	1.48	1.37	1.81	High	High	High	High	High	High	High	High	High	High	High	High
FALSE	High	Master Protein	Dlo_pri0053F.1_g00870.1	Dlo_pri0053F.1_g00870.1	0	41.389	16	8	20	8	622	70.5	6.23	466	8	0	0	0.801	0.806	0.979	1.006	1.221	1.214	1	1	1	1	1	1	111.5	89.4	89.9	109.2	1.23	3.64	2.55	1.67	High	High	High	High	High	High	High	High	High	High	High	High
FALSE	High	Master Protein	Dlo_pri0046F.1_g00530.1	Dlo_pri0046F.1_g00530.1	0	22.778	38	4	20	2	133	14.2	5.02	551	4	0	2	0.727	1.211	0.669	1.666	0.92	0.552	1	1	1	1	1	1	110.9	80.6	134.3	74.2	1.28	2.51	3.53	3.76	High	High	High	High	High	High	High	High	High	High	High	High
FALSE	High	Master Protein	Dlo_pri0024F.1_g04820.1	Dlo_pri0024F.1_g04820.1	0	49.717	42	9	20	1	273	30.6	5.25	509	9	0	0	1.022	1.093	0.943	1.069	0.923	0.863	1	1	1	1	1	1	98.6	100.8	107.7	93	3.83	1.31	4.74	2.85	High	Not Found	High	High	Not Found	High	High	Not Found	High	High	Not Found	High
FALSE	High	Master Protein	Dlo_pri0014F.1_g03670.1	Dlo_pri0014F.1_g03670.1	0	41.309	52	5	20	5	126	14.8	9.74	689	5	0	0	1.041	0.976	0.957	0.938	0.919	0.981	1	1	1	1	1	1	100.7	104.8	98.2	96.3	1.4	0.98	1.21	1.82	High	High	High	High	High	High	High	High	High	High	High	High
FALSE	High	Master Protein	Dlo_pri0261F.1_g00210.1	Dlo_pri0261F.1_g00210.1	0	47.575	10	6	20	5	793	89.7	5.26	651	6	0	0	0.585	0.921	0.665	1.575	1.136	0.722	1	1	1	1	1	1	126.1	73.8	116.2	83.9	1.04	3.78	5.39	3.82	High	High	High	High	High	High	High	High	High	High	High	High
FALSE	High	Master Protein	Dlo_pri0038F.1_g01080.1	Dlo_pri0038F.1_g01080.1	0	35.677	12	6	20	5	479	53.5	7.55	575	6	0	1	0.829	0.969	0.896	1.17	1.081	0.924	1	1	1	1	1	1	108.3	89.7	105	97	2.22	0.87	2.5	1.05	High	High	High	High	High	High	High	High	High	High	High	High
FALSE	High	Master Protein	Dlo_pri0450F.1_g00890.1	Dlo_pri0450F.1_g00890.1	0	33.613	26	6	20	4	278	31.6	5.21	517	6	0	2	0.969	0.872	0.935	0.9	0.966	1.073	1	1	1	1	1	1	105.9	102.6	92.3	99.1	0.23	0.57	1.93	1.77	High	High	High	High	High	High	High	High	High	High	High	High
FALSE	High	Master Protein	Dlo_pri0502F.1_g00420.1	Dlo_pri0502F.1_g00420.1	0	25.081	27	5	20	5	155	17.6	10.24	418	5	0	0	1.232	0.974	1.021	0.791	0.829	1.048	1	1	1	1	1	1	94.6	116.6	92.2	96.6	3.86	8.57	6.8	1.91	High	High	High	High	High	High	High	High	High	High	High	High
FALSE	High	Master Protein	Dlo_pri0070F.1_g02710.1	Dlo_pri0070F.1_g02710.1	0	39.251	23	6	20	6	359	39.1	7.53	564	6	0	0	1.726	1.119	0.91	0.648	0.527	0.814	1	1	1	1	1	1	84.1	145.2	94.1	76.6	0.49	2.13	2.64	1.38	High	High	High	High	High	High	High	High	High	High	High	High
FALSE	High	Master Protein	Dlo_pri1391F.1_g00070.1	Dlo_pri1391F.1_g00070.1	0	48.944	37	9	20	9	319	34.4	5.58	541	9	0	0	1.178	0.954	1.303	0.81	1.106	1.366	1	1	1	1	1	1	90.2	106.3	86	117.5	1.57	0.59	0.97	1.2	High	High	High	High	High	High	High	High	High	High	High	High
FALSE	High	Master Protein	Dlo_pri1391F.1_g00030.1	Dlo_pri1391F.1_g00030.1	0	27.898	14	4	20	2	356	37.5	8.16	578	4	0	1	0.867	0.948	0.914	1.094	1.054	0.964	1	1	1	1	1	1	107.3	93	101.7	98.1	2.97	9.33	3.05	2.78	High	High	High	High	High	High	High	High	High	High	High	High
FALSE	High	Master Protein	Dlo_pri0606F.1_g00080.1	Dlo_pri0606F.1_g00080.1	0	65.1	25	9	20	6	535	58.9	5.33	612	9	0	0	1.081	0.841	1.107	0.779	1.025	1.316	1	1	1	1	1	1	99.3	107.3	83.5	109.9	2.32	2.03	3.48	1.76	High	High	High	High	High	High	High	High	High	High	High	High
FALSE	High	Master Protein	Dlo_pri0164F.1_g01600.1	Dlo_pri0164F.1_g01600.1	0	43.815	11	6	20	6	988	107.1	8.35	613	6	0	0	0.967	1.231	1.076	1.272	1.112	0.874	1	1	1	1	1	1	93.6	90.5	115.2	100.7	2.31	4.85	3.98	2.25	High	High	High	High	High	High	High	High	High	High	High	High
FALSE	High	Master Protein	Dlo_pri0021F.1_g08070.1	Dlo_pri0021F.1_g08070.1	0	24.988	11	5	20	4	423	46.4	6.58	443	5	0	0	1.284	0.927	1.152	0.722	0.897	1.243	0.561506	1	1	0.167161	1	0.967605	91.7	117.7	85	105.6	1.41	1.77	1	1.38	High	High	High	High	High	High	High	High	High	High	High	High
FALSE	High	Master Protein	Dlo_pri0041F.1_g02550.1	Dlo_pri0041F.1_g02550.1	0	32.587	33	7	20	3	217	24.1	5.95	395	7	0	0	0.901	1.163	0.964	1.291	1.07	0.829	1	1	1	1	1	1	99.3	89.5	115.5	95.8	3.76	0.54	1.1	4.63	High	High	High	High	High	High	High	High	High	High	High	High
FALSE	High	Master Protein	Dlo_pri0305F.1_g01580.1	Dlo_pri0305F.1_g01580.1	0	42.008	29	6	20	6	232	25.6	8.06	629	6	0	0	0.943	1.149	0.896	1.218	0.95	0.78	1	1	1	0.257938	1	0.0904487	100.3	94.6	115.2	89.9	0.65	4.28	4.96	2.44	High	High	High	High	High	High	High	High	High	High	High	High
FALSE	High	Master Protein	Dlo_pri0493F.1_g00350.1	Dlo_pri0493F.1_g00350.1	0	40.402	34	6	20	1	204	24.1	11.31	604	6	0	0	1.361	1.253	1.073	0.92	0.788	0.856	1	1	1	1	1	1	85.3	116.2	106.9	91.6	1.49	4.79	3.54	3.43	High	High	High	High	High	High	High	High	High	High	High	High
FALSE	High	Master Protein	Dlo_pri0074F.1_g02490.1	Dlo_pri0074F.1_g02490.1	0	44.254	12	11	20	11	1076	123.7	5.49	435	11	0	0	0.842	0.922	0.907	1.095	1.076	0.983	1	1	1	1	1	1	109	91.8	100.5	98.8	1.68	6.66	2.68	2.4	High	High	High	High	High	High	High	High	High	High	High	High
FALSE	High	Master Protein	Dlo_pri0284F.1_g01340.1	Dlo_pri0284F.1_g01340.1	0	25.961	13	4	20	2	399	44.3	9.06	519	4	0	0	0.969	1.292	1.408	1.333	1.452	1.09	1	1	1	1	1	1	85.7	83	110.7	120.6	0.31	7.22	0.68	5.82	High	Not Found	High	High	Not Found	High	High	Not Found	High	High	Not Found	High
FALSE	High	Master Protein	Dlo_pri0233F.1_g01110.1	Dlo_pri0233F.1_g01110.1	0	56.933	12	12	20	12	1325	145.6	6.49	478	12	0	0	0.957	1.061	0.976	1.109	1.021	0.92	1	1	1	1	1	1	100.1	95.8	106.3	97.8	0.8	3.36	4.54	2.77	High	High	High	High	High	High	High	High	High	High	High	High
FALSE	High	Master Protein	Dlo_pri0443F.1_g00350.1	Dlo_pri0443F.1_g00350.1	0	35.224	33	7	20	7	235	26.5	6.79	507	7	0	0	0.91	0.957	0.992	1.052	1.091	1.037	0.212273	1	1	1	0.579224	1	103.7	94.3	99.2	102.9	1.19	1.93	2.25	1.47	High	High	High	High	High	High	High	High	High	High	High	High
FALSE	High	Master Protein	Dlo_alt0015F-014-01.1_g00170.1	Dlo_alt0015F-014-01.1_g00170.1	0	25.323	15	5	20	2	344	38	10.48	512	5	0	3	0.98	1.074	1.022	1.096	1.044	0.952	1	1	1	1	1	1	98.1	96.1	105.4	100.3	1.88	5.84	2.79	1.11	High	High	High	High	High	High	High	High	High	High	High	High
FALSE	High	Master Protein	Dlo_pri0024F.1_g00250.1	Dlo_pri0024F.1_g00250.1	0	32.382	26	7	20	6	298	31.9	9.29	445	7	0	1	0.947	1.03	0.954	1.088	1.008	0.926	1	1	1	1	1	1	101.7	96.4	104.8	97.1	0.61	0.95	2.51	1.19	High	High	High	High	High	High	High	High	High	High	High	High
FALSE	High	Master Protein	Dlo_pri0026F.1_g01980.1	Dlo_pri0026F.1_g01980.1	0	33.238	8	6	20	2	858	91.6	8.41	459	6	0	0	1.042	1.031	0.893	0.99	0.858	0.867	1	1	1	1	1	1	100.9	105.1	104	90.1	1.23	1.46	1.52	1.05	High	High	High	High	High	High	High	High	High	High	High	High
FALSE	High	Master Protein	Dlo_pri1717F.1_g00010.1	Dlo_pri1717F.1_g00010.1	0	49.864	38	9	20	1	291	32.7	5.22	525	9	0	8	1.017	1.002	1.008	0.985	0.991	1.006	1	1	1	1	1	1	99.3	101	99.5	100.1	5.3	5.5	2.05	1.24	High	High	Not Found	High	High	Not Found	High	High	Not Found	High	High	Not Found
FALSE	High	Master Protein	Dlo_pri0170F.1_g01040.1	Dlo_pri0170F.1_g01040.1	0	42	29	8	20	8	287	30.4	5.8	447	8	0	0	0.961	1.196	0.972	1.245	1.012	0.813	1	1	1	1	1	1	96.9	93.1	115.9	94.2	1.48	0.68	2.29	3.91	High	High	High	High	High	High	High	High	High	High	High	High
FALSE	High	Master Protein	Dlo_pri0239F.1_g00690.1	Dlo_pri0239F.1_g00690.1	0	40.884	38	7	20	6	242	26.7	6.7	394	7	0	0	1.176	0.941	1.032	0.8	0.878	1.097	1	1	1	1	1	1	96.4	113.4	90.7	99.5	4.18	5.49	4.71	3.16	High	High	High	High	High	High	High	High	High	High	High	High
FALSE	High	Master Protein	Dlo_pri0006F.1_g01120.1	Dlo_pri0006F.1_g01120.1	0	54.626	10	11	20	11	1385	149.5	5.91	450	11	0	0	1.008	0.993	0.98	0.985	0.972	0.987	1	1	1	1	1	1	100.5	101.3	99.8	98.4	2.9	3.4	0.78	0.37	High	High	High	High	High	High	High	High	High	High	High	High
FALSE	High	Master Protein	Dlo_pri0074F.1_g03970.1	Dlo_pri0074F.1_g03970.1	0	46.659	21	7	20	7	441	48.5	6.58	585	7	0	0	1.219	1.023	1.117	0.84	0.917	1.092	1	1	1	1	1	1	91.8	111.8	93.9	102.5	2	1.73	1.46	1.64	High	High	High	High	High	High	High	High	High	High	High	High
FALSE	High	Master Protein	Dlo_pri0205F.1_g00760.1	Dlo_pri0205F.1_g00760.1	0	26.512	9	4	20	4	483	53.1	6.48	677	4	0	0	1.241	0.911	0.961	0.734	0.774	1.055	1	1	1	1	1	1	97.3	120.7	88.6	93.5	0.21	0.69	2.44	1.24	High	High	High	High	High	High	High	High	High	High	High	High
FALSE	High	Master Protein	Dlo_pri0033F.1_g01390.1	Dlo_pri0033F.1_g01390.1	0	30.407	24	5	20	5	213	24.2	5.24	229	5	0	0	1.008	1.516	0.447	1.504	0.443	0.295	1	1	1	1	1	1	100.7	101.6	152.7	45	5.03	2.52	4.58	19.54	High	High	High	High	High	High	High	High	High	High	High	High
FALSE	High	Master Protein	Dlo_pri0502F.1_g00830.1	Dlo_pri0502F.1_g00830.1	0	35.476	9	4	20	1	550	60	7.62	687	4	0	0	0.894	1.088	0.963	1.217	1.077	0.885							101.4	90.6	110.3	97.6					Not Found	High	Not Found	Not Found	High	Not Found	Not Found	High	Not Found	Not Found	High	Not Found
FALSE	High	Master Protein	Dlo_pri0048F.1_g01000.1	Dlo_pri0048F.1_g01000.1	0	57.798	15	12	19	4	949	106.8	5.06	507	12	0	8	0.906	0.974	0.934	1.075	1.031	0.959	1	1	1	1	1	1	104.9	95	102.1	98	0.21	1.75	4.44	3.09	High	High	High	High	High	High	High	High	High	High	High	High
FALSE	High	Master Protein	Dlo_pri0325F.1_g00610.1	Dlo_pri0325F.1_g00610.1	0	64.6	19	8	19	3	592	66.6	7.87	544	8	0	4	1.05	0.913	0.928	0.87	0.884	1.016	1	1	1	1	1	1	102.8	107.9	93.9	95.4	1.51	3.33	2.11	3.43	High	High	Not Found	High	High	Not Found	High	High	Not Found	High	High	Not Found
FALSE	High	Master Protein	Dlo_pri0174F.1_g00300.1	Dlo_pri0174F.1_g00300.1	0	34.736	31	7	19	4	236	25.8	7.08	430	7	0	2	0.899	0.947	0.811	1.054	0.903	0.857	1	1	1	1	1	1	109.4	98.3	103.6	88.7	2.26	2.19	2.01	3.16	High	High	High	High	High	High	High	High	High	High	High	High
FALSE	High	Master Protein	Dlo_pri0174F.1_g00250.1	Dlo_pri0174F.1_g00250.1	0	41.722	20	6	19	2	402	44.4	7.43	485	6	0	2	0.688	0.874	0.672	1.27	0.976	0.768	1	1	1	1	1	1	123.7	85.1	108.1	83.1	4.91	6.87	0.58	0.58	High	High	High	High	High	High	High	High	High	High	High	High
FALSE	High	Master Protein	Dlo_pri0218F.1_g00940.1	Dlo_pri0218F.1_g00940.1	0	32.921	17	6	19	1	459	50	9.54	380	6	0	5	0.865	1.026	0.848	1.187	0.981	0.827	1	1	1	1	1	1	107	92.5	109.8	90.7	5.17	4.95	1.27	3.13	High	Not Found	High	High	Not Found	High	High	Not Found	High	High	Not Found	High
FALSE	High	Master Protein	Dlo_alt0088F-004-01.1_g00050.1	Dlo_alt0088F-004-01.1_g00050.1	0	26.356	16	6	19	6	407	45.1	8.37	284	6	0	0	0.946	0.945	1.062	0.999	1.123	1.125	1	1	1	1	1	1	101.2	95.7	95.6	107.5	2.46	3.43	4.74	3.25	High	High	High	High	High	High	High	High	High	High	High	High
FALSE	High	Master Protein	Dlo_pri0024F.1_g01360.1	Dlo_pri0024F.1_g01360.1	0	24.181	27	6	19	2	216	24	7.81	399	6	0	0	1.197	1.117	0.914	0.934	0.764	0.818	1	1	1	1	1	1	94.6	113.2	105.7	86.4	3.92	6.18	1.48	4.3	High	High	High	High	High	High	High	High	High	High	High	High
FALSE	High	Master Protein	Dlo_pri0083F.1_g00300.1	Dlo_pri0083F.1_g00300.1	0	52.238	25	10	19	7	535	59.3	5.44	478	10	0	0	0.926	1.004	0.933	1.084	1.007	0.929	1	1	1	1	1	1	103.6	95.9	103.9	96.6	8.35	13.11	4.51	6.76	High	High	High	High	High	High	High	High	High	High	High	High
FALSE	High	Master Protein	Dlo_pri0032F.1_g01080.1	Dlo_pri0032F.1_g01080.1	0	31.731	24	4	19	1	201	22.7	10.14	521	4	0	0	0.638	1.002	0.743	1.571	1.165	0.741							118.3	75.4	118.5	87.9					High	Not Found	Not Found	High	Not Found	Not Found	High	Not Found	Not Found	High	Not Found	Not Found
FALSE	High	Master Protein	Dlo_pri0138F.1_g00160.1	Dlo_pri0138F.1_g00160.1	0	36.532	48	7	19	7	143	16.3	10.04	449	7	0	0	1.007	0.947	0.974	0.941	0.967	1.028	1	1	1	1	1	1	101.8	102.5	96.5	99.2	2.85	8.67	2.48	6.32	High	High	High	High	High	High	High	High	High	High	High	High
FALSE	High	Master Protein	Dlo_pri0681F.1_g00270.1	Dlo_pri0681F.1_g00270.1	0	36.272	14	6	19	1	498	56	5.97	607	6	0	0	0.827	1.222	1.02	1.477	1.233	0.834							98.3	81.3	120.1	100.2					High	Not Found	Not Found	High	Not Found	Not Found	High	Not Found	Not Found	High	Not Found	Not Found
FALSE	High	Master Protein	Dlo_pri0497F.1_g00100.1	Dlo_pri0497F.1_g00100.1	0	47.633	67	4	19	2	102	11.2	4.12	761	4	0	0	0.818	0.861	0.813	1.054	0.994	0.944	1	1	1	1	1	1	114.6	93.7	98.7	93.1	2.47	0.91	1.41	2.38	High	High	High	High	High	High	High	High	High	High	High	High
FALSE	High	Master Protein	Dlo_pri0382F.1_g01060.1	Dlo_pri0382F.1_g01060.1	0	49.133	18	8	19	8	636	67.7	7.15	615	8	0	0	1.049	0.993	1.129	0.946	1.077	1.138	1	1	1	1	1	1	95.9	100.6	95.2	108.3	0.57	1.43	0.68	2	High	High	High	High	High	High	High	High	High	High	High	High
FALSE	High	Master Protein	Dlo_pri0015F.1_g01070.1	Dlo_pri0015F.1_g01070.1	0	36.436	17	9	19	9	639	70.5	5.94	381	9	0	0	0.749	0.916	0.87	1.222	1.16	0.95	1	1	1	1	1	1	113.2	84.8	103.6	98.4	1.59	2.21	0.73	1.1	High	High	High	High	High	High	High	High	High	High	High	High
FALSE	High	Master Protein	Dlo_pri0001F.1_g11640.1	Dlo_pri0001F.1_g11640.1	0	31.249	44	5	19	5	157	17.3	8.44	663	5	0	0	1.212	1.14	1.075	0.941	0.887	0.943	1	1	1	1	1	1	90.3	109.5	103	97.2	2.89	0.79	2.56	2.79	High	High	High	High	High	High	High	High	High	High	High	High
FALSE	High	Master Protein	Dlo_pri0046F.1_g02280.1	Dlo_pri0046F.1_g02280.1	0	50.566	16	8	19	8	681	78.1	8.27	507	8	0	0	0.853	0.978	0.932	1.146	1.092	0.953	1	1	1	1	1	1	106.3	90.7	103.9	99.1	0.89	1.96	0.98	1.45	High	High	High	High	High	High	High	High	High	High	High	High
FALSE	High	Master Protein	Dlo_alt0026F-016-01.1_g00070.1	Dlo_alt0026F-016-01.1_g00070.1	0	44.112	54	5	19	3	179	19.8	4.88	764	5	0	2	0.929	1.004	0.926	1.081	0.997	0.922	1	1	1	1	1	1	103.7	96.3	104.1	96	2.18	2.66	2.91	1.59	High	High	High	High	High	High	High	High	High	High	High	High
FALSE	High	Master Protein	Dlo_pri0018F.1_g03550.1	Dlo_pri0018F.1_g03550.1	0	47.615	19	10	19	5	657	74.2	6.79	513	10	0	5	0.985	1.211	1.184	1.229	1.202	0.978	1	1	1	1	1	1	91.3	90	110.6	108.1	6.46	6.15	6.13	3.95	High	High	High	High	High	High	High	High	High	High	High	High
FALSE	High	Master Protein	Dlo_pri0022F.1_g04850.1	Dlo_pri0022F.1_g04850.1	0	55.862	27	11	19	11	450	51.5	6.4	567	11	0	0	0.88	0.989	1.001	1.125	1.138	1.012	1	1	1	1	1	1	103.4	90.9	102.3	103.4	3.08	1.25	1.44	5.64	High	High	High	High	High	High	High	High	High	High	High	High
FALSE	High	Master Protein	Dlo_pri0221F.1_g00120.1	Dlo_pri0221F.1_g00120.1	0	49.803	20	8	19	5	492	55.1	8.56	506	8	0	3	1.375	0.862	0.921	0.627	0.67	1.068	1	1	1	0.655696	1	1	96.2	132.2	82.9	88.6	0.8	0.87	2.57	3.67	High	High	High	High	High	High	High	High	High	High	High	High
FALSE	High	Master Protein	Dlo_pri0488F.1_g00170.1	Dlo_pri0488F.1_g00170.1	0	28.051	17	6	19	6	352	39.5	8.66	434	6	0	0	1.068	1.333	0.863	1.248	0.807	0.647	1	1	1	1	1	1	93.8	100.2	125	80.9	0.75	2.58	3.07	2.48	High	High	High	High	High	High	High	High	High	High	High	High
FALSE	High	Master Protein	Dlo_pri0141F.1_g00130.1	Dlo_pri0141F.1_g00130.1	0	46.011	32	7	19	7	262	28.6	7.03	641	7	0	0	1	0.943	0.948	0.943	0.948	1.005	1	1	1	1	1	1	102.8	102.8	97	97.4	0.54	3.01	5.15	2.49	High	High	High	High	High	High	High	High	High	High	High	High
FALSE	High	Master Protein	Dlo_pri0034F.1_g01670.1	Dlo_pri0034F.1_g01670.1	0	21.568	23	5	19	5	256	28.8	4.92	482	5	0	0	1.008	0.853	0.769	0.846	0.763	0.902	1	1	1	1	1	1	110.2	111.1	94	84.8	2.45	2.43	1.69	2.52	High	High	High	High	High	High	High	High	High	High	High	High
FALSE	High	Master Protein	Dlo_pri0010F.1_g03510.1	Dlo_pri0010F.1_g03510.1	0	44.339	31	7	19	7	289	31.7	5.07	487	7	0	0	0.945	1.048	0.947	1.11	1.003	0.903	1	1	1	1	1	1	101.5	95.9	106.4	96.1	1.42	3.27	2.08	1.2	High	High	High	High	High	High	High	High	High	High	High	High
FALSE	High	Master Protein	Dlo_pri0253F.1_g01270.1	Dlo_pri0253F.1_g01270.1	0	37.007	26	7	19	1	380	41.5	7.11	540	7	0	0	1.205	1.081	1.005	0.897	0.834	0.93							93.2	112.3	100.8	93.7					High	Not Found	Not Found	High	Not Found	Not Found	High	Not Found	Not Found	High	Not Found	Not Found
FALSE	High	Master Protein	Dlo_pri0097F.1_g02490.1	Dlo_pri0097F.1_g02490.1	0	37.463	17	6	19	4	443	49	5.22	471	6	0	0	0.934	1.141	1.07	1.222	1.145	0.937	1	1	1	1	1	1	96.5	90.1	110.1	103.2	1.57	0.31	1.62	0.16	High	High	High	High	High	High	High	High	High	High	High	High
FALSE	High	Master Protein	Dlo_pri0144F.1_g02430.1	Dlo_pri0144F.1_g02430.1	0	35.887	14	7	19	2	567	61.8	6.35	494	7	0	0	1.033	1.004	0.952	0.972	0.921	0.948	1	1	1	1	1	1	100.3	103.6	100.7	95.5	1.36	2.16	4.03	3.33	High	High	Not Found	High	High	Not Found	High	High	Not Found	High	High	Not Found
FALSE	High	Master Protein	Dlo_pri0601F.1_g00210.1	Dlo_pri0601F.1_g00210.1	0	50.659	18	11	19	11	839	91.5	5.5	416	11	0	0	0.882	0.936	0.982	1.062	1.113	1.048	1	1	1	1	1	1	105.3	92.8	98.6	103.3	1.17	2.61	3.1	3.46	High	High	High	High	High	High	High	High	High	High	High	High
FALSE	High	Master Protein	Dlo_pri0196F.1_g01310.1	Dlo_pri0196F.1_g01310.1	0	35.251	24	7	19	7	349	38.5	7.18	400	7	0	0	1.146	1.005	0.917	0.877	0.8	0.912	1	1	1	1	1	1	98.3	112.7	98.8	90.2	6.29	1.92	5.38	2.17	High	High	High	High	High	High	High	High	High	High	High	High
FALSE	High	Master Protein	Dlo_pri0190F.1_g02120.1	Dlo_pri0190F.1_g02120.1	0	32.345	15	5	19	5	500	54.8	9.16	447	5	0	0	0.783	0.988	0.795	1.262	1.014	0.804	1	1	1	1	1	1	112.2	87.9	110.8	89.1	2.13	5.98	1.38	5.3	High	High	High	High	High	High	High	High	High	High	High	High
FALSE	High	Master Protein	Dlo_pri0246F.1_g00270.1	Dlo_pri0246F.1_g00270.1	0	32.71	22	4	19	1	220	24.9	10.39	516	4	0	3	0.772	1.193	1.04	1.545	1.348	0.872	1	1	1	0.629935	1	1	99.9	77.1	119.1	103.9	1.95	1.62	0.58	1.24	High	Not Found	Not Found	High	Not Found	Not Found	High	Not Found	Not Found	High	Not Found	Not Found
FALSE	High	Master Protein	Dlo_pri0611F.1_g00160.1	Dlo_pri0611F.1_g00160.1	0	43.009	30	7	19	7	344	37.9	5.52	608	7	0	0	1.159	0.977	1.03	0.843	0.889	1.054	1	1	1	1	1	1	96	111.2	93.8	98.9	1.76	2.83	4.1	1.93	High	High	High	High	High	High	High	High	High	High	High	High
FALSE	High	Master Protein	Dlo_alt0032F-025-01.1_g00230.1	Dlo_alt0032F-025-01.1_g00230.1	0	37.098	18	7	19	5	459	49.4	6.73	641	7	0	2	0.893	1.023	0.883	1.146	0.988	0.863	1	1	1	1	1	1	105.3	94	107.7	92.9	2.32	2.86	0.82	1.47	High	High	High	High	High	High	High	High	High	High	High	High
FALSE	High	Master Protein	Dlo_pri0001F.1_g05030.1	Dlo_pri0001F.1_g05030.1	0	49.561	4	11	19	11	3161	350	5.86	499	11	0	0	1.008	0.996	1.032	0.988	1.024	1.036	1	1	1	1	1	1	99.1	99.9	98.7	102.3	3.93	4.13	3.86	4.42	High	High	High	High	High	High	High	High	High	High	High	High
FALSE	High	Master Protein	Dlo_pri0207F.1_g00370.1	Dlo_pri0207F.1_g00370.1	0	60.024	17	6	19	1	483	53.7	5.12	528	6	0	0	0.828	1.015	0.844	1.226	1.019	0.832	1	1	1	1	1	1	108.5	89.8	110.1	91.6	1.28	3.35	1.12	2.43	High	High	High	High	High	High	High	High	High	High	High	High
FALSE	High	Master Protein	Dlo_pri0028F.1_g00930.1	Dlo_pri0028F.1_g00930.1	0	35.463	34	6	19	1	204	24.2	11.31	544	6	0	6	1.006	0.943	0.921	0.937	0.916	0.977	1	1	1	1	1	1	103.4	104	97.5	95.2	0.43	2.67	1.98	1.28	High	High	High	High	High	High	High	High	High	High	High	High
FALSE	High	Master Protein	Dlo_alt0116F-017-01.1_g00020.1	Dlo_alt0116F-017-01.1_g00020.1	0	38.914	15	8	19	3	571	62.4	5.66	420	8	0	5	0.999	1.159	0.924	1.16	0.924	0.797	1	1	1	1	1	1	98	97.9	113.6	90.5	9.36	13.35	7.44	7.28	High	High	High	High	High	High	High	High	High	High	High	High
FALSE	High	Master Protein	Dlo_pri0151F.1_g01860.1	Dlo_pri0151F.1_g01860.1	0	39.781	14	8	19	8	733	81.2	6.09	484	8	0	0	0.994	0.936	0.915	0.941	0.92	0.978	1	1	1	1	1	1	104	103.4	97.4	95.2	1.69	4.27	3.76	0.8	High	High	High	High	High	High	High	High	High	High	High	High
FALSE	High	Master Protein	Dlo_pri0046F.1_g03150.1	Dlo_pri0046F.1_g03150.1	0	44.377	48	4	19	2	185	20.4	4.79	616	4	0	0	2.322	1.123	0.894	0.484	0.385	0.796	1	1	1	1	1	1	74.9	173.9	84.2	67	16.58	12.61	13.26	30.21	High	High	High	High	High	High	High	High	High	High	High	High
FALSE	High	Master Protein	Dlo_pri0195F.1_g00860.1	Dlo_pri0195F.1_g00860.1	0	27.217	11	6	19	3	442	48.8	6.33	289	6	0	0	0.941	1.323	0.833	1.406	0.886	0.63	1	1	1	1	1	0.58326	97.6	91.9	129.1	81.4	9.03	3.82	3.93	1.32	High	High	High	High	High	High	High	High	High	High	High	High
FALSE	High	Master Protein	Dlo_pri0248F.1_g00330.1	Dlo_pri0248F.1_g00330.1	0	38.538	13	8	18	8	772	81.1	8.76	601	8	0	0	1.183	1.043	1.444	0.882	1.221	1.384	1	1	1	1	1	1	85.7	101.3	89.3	123.7	0.53	2.56	2.85	1.18	High	High	High	High	High	High	High	High	High	High	High	High
FALSE	High	Master Protein	Dlo_pri0142F.1_g00290.1	Dlo_pri0142F.1_g00290.1	0	30.365	39	6	18	4	203	22.5	5.69	422	6	0	1	0.835	0.986	0.795	1.181	0.952	0.806	1	1	1	1	1	1	110.6	92.4	109.1	87.9	5.11	7.13	2.7	4.85	High	High	High	High	High	High	High	High	High	High	High	High
FALSE	High	Master Protein	Dlo_pri0380F.1_g00410.1	Dlo_pri0380F.1_g00410.1	0	47.058	27	8	18	8	420	46.8	9.36	495	8	0	0	0.721	0.848	0.807	1.176	1.12	0.952	1	1	1	1	1	1	118.5	85.4	100.4	95.6	1.84	5.12	4.66	2.13	High	High	High	High	High	High	High	High	High	High	High	High
FALSE	High	Master Protein	Dlo_pri0666F.1_g00540.1	Dlo_pri0666F.1_g00540.1	0	40.569	21	7	18	7	453	48.1	6.68	563	7	0	0	1.08	1.13	1.068	1.046	0.989	0.945	1	1	1	1	1	1	93.5	101	105.6	99.9	1.1	5.14	3.56	0.62	High	High	High	High	High	High	High	High	High	High	High	High
FALSE	High	Master Protein	Dlo_pri0001F.1_g08140.1	Dlo_pri0001F.1_g08140.1	0	32.524	33	8	18	4	286	31.4	5.25	323	8	0	0	0.822	1.194	0.762	1.453	0.928	0.638	1	1	1	0.779839	1	0.481064	105.9	87	126.4	80.7	1.35	0.76	1.55	1.35	High	High	High	High	High	High	High	High	High	High	High	High
FALSE	High	Master Protein	Dlo_pri0050F.1_g02490.1	Dlo_pri0050F.1_g02490.1	0	29.587	33	8	18	5	245	26.9	7.42	495	8	0	3	0.941	0.955	0.924	1.014	0.981	0.967	1	1	1	1	1	1	104.7	98.6	100	96.7	2.55	1.69	3.43	4.37	High	High	High	High	High	High	High	High	High	High	High	High
FALSE	High	Master Protein	Dlo_pri0355F.1_g01260.1	Dlo_pri0355F.1_g01260.1	0	35.282	28	9	18	9	327	36.9	8.35	367	9	0	0	0.847	0.927	0.829	1.094	0.978	0.894	1	1	1	1	1	1	111	94.1	102.9	92	1.91	3.37	1.12	2.36	High	High	High	High	High	High	High	High	High	High	High	High
FALSE	High	Master Protein	Dlo_alt0084F-010-01-1.1_g00050.1	Dlo_alt0084F-010-01-1.1_g00050.1	0	40.409	10	5	18	5	740	80.6	6.21	463	5	0	0	1.506	1.309	1.578	0.87	1.048	1.205	1	1	1	1	1	1	74.2	111.7	97.1	117	5.33	0.57	3.84	1.72	High	High	High	High	High	High	High	High	High	High	High	High
FALSE	High	Master Protein	Dlo_pri0000F.1_g05130.1	Dlo_pri0000F.1_g05130.1	0	36.277	20	7	18	7	435	47.5	5.26	458	7	0	0	1.131	1.009	1.295	0.892	1.145	1.283	1	1	1	1	1	1	90.2	102	91	116.8	1.12	0.71	1.18	1.15	High	High	High	High	High	High	High	High	High	High	High	High
FALSE	High	Master Protein	Dlo_pri0325F.1_g01130.1	Dlo_pri0325F.1_g01130.1	0	29.894	19	4	18	4	307	32.3	4.72	639	4	0	0	0.694	0.635	0.966	0.914	1.392	1.522	1	1	1	1	1	1	121.4	84.3	77	117.3	0.31	2.32	3.62	3.09	High	High	High	High	High	High	High	High	High	High	High	High
FALSE	High	Master Protein	Dlo_pri0040F.1_g00090.1	Dlo_pri0040F.1_g00090.1	0	25.482	29	3	18	1	146	16	8.84	285	3	0	0	1.19	1.141	1.238	0.959	1.04	1.085							87.5	104.2	99.9	108.4					Not Found	Not Found	High	Not Found	Not Found	High	Not Found	Not Found	High	Not Found	Not Found	High
FALSE	High	Master Protein	Dlo_pri0073F.1_g02480.1	Dlo_pri0073F.1_g02480.1	0	48.203	22	9	18	9	497	54.4	4.75	461	9	0	0	1.012	0.905	0.932	0.894	0.92	1.03	1	1	1	1	1	1	103.9	105.2	94	96.8	1.78	4.69	7.33	0.97	High	High	High	High	High	High	High	High	High	High	High	High
FALSE	High	Master Protein	Dlo_pri0006F.1_g04640.1	Dlo_pri0006F.1_g04640.1	0	37.011	25	8	18	5	421	46.3	5.58	450	8	0	3	0.993	1.049	1.047	1.056	1.054	0.998	1	1	1	1	1	1	97.8	97.2	102.6	102.4	6.48	7.84	2.47	3.24	High	High	High	High	High	High	High	High	High	High	High	High
FALSE	High	Master Protein	Dlo_pri0118F.1_g00200.1	Dlo_pri0118F.1_g00200.1	0	37.004	29	3	18	3	230	25.4	7.18	597	3	0	0	1.716	1.35	1.37	0.787	0.798	1.014	1	1	1	1	1	1	73.6	126.3	99.4	100.8	3.66	0.58	1.47	1.44	High	High	High	High	High	High	High	High	High	High	High	High
FALSE	High	Master Protein	Dlo_pri0173F.1_g00900.1	Dlo_pri0173F.1_g00900.1	0	29.001	9	6	18	6	729	81.8	7.23	442	6	0	0	0.911	0.999	0.934	1.096	1.025	0.935	1	1	1	1	1	1	104.1	94.8	104	97.2	1.61	8.65	6.87	0.66	High	High	High	High	High	High	High	High	High	High	High	High
FALSE	High	Master Protein	Dlo_pri0200F.1_g00720.1	Dlo_pri0200F.1_g00720.1	0	36.97	19	8	18	8	511	58.1	8.41	423	8	0	0	1.291	1.058	1.204	0.819	0.933	1.138	1	1	1	1	1	1	87.9	113.4	92.9	105.8	6.05	3.9	4.94	2.4	High	High	High	High	High	High	High	High	High	High	High	High
FALSE	High	Master Protein	Dlo_pri0002F.1_g03110.1	Dlo_pri0002F.1_g03110.1	0	49.94	14	6	18	6	527	57.3	7.81	608	6	0	0	0.559	0.488	0.765	0.873	1.37	1.568	1	1	1	1	1	1	142.3	79.5	69.4	108.9	6.96	7.18	9.98	2.42	High	High	High	High	High	High	High	High	High	High	High	High
FALSE	High	Master Protein	Dlo_pri0067F.1_g00460.1	Dlo_pri0067F.1_g00460.1	0	32.693	38	7	18	4	216	23.9	7.88	319	7	0	0	1.129	1.036	1.052	0.918	0.932	1.016	1	1	1	1	1	1	94.8	107.1	98.3	99.8	1.3	1.94	1.64	1.32	High	High	High	High	High	High	High	High	High	High	High	High
FALSE	High	Master Protein	Dlo_pri0209F.1_g00710.1	Dlo_pri0209F.1_g00710.1	0	34.934	22	7	18	7	331	34.6	9.04	542	7	0	0	1.289	0.994	0.975	0.771	0.756	0.981	1	1	1	1	1	1	93.9	121.1	93.4	91.6	11.49	17.1	9.05	5.13	High	High	High	High	High	High	High	High	High	High	High	High
FALSE	High	Master Protein	Dlo_pri0002F.1_g03030.1	Dlo_pri0002F.1_g03030.1	0	56.31	8	11	18	11	1800	199.5	5.5	492	11	0	0	0.82	0.965	0.939	1.176	1.144	0.973	1	1	1	1	1	1	107.4	88.1	103.7	100.8	0.48	2.11	2.39	1.98	High	High	High	High	High	High	High	High	High	High	High	High
FALSE	High	Master Protein	Dlo_pri0098F.1_g02930.1	Dlo_pri0098F.1_g02930.1	0	46.276	16	4	18	3	385	41.8	6.33	527	4	0	1	0.887	1.056	0.844	1.19	0.951	0.799	1	1	1	1	1	1	105.6	93.7	111.5	89.2	2.75	7.48	5.96	4.83	High	High	High	High	High	High	High	High	High	High	High	High
FALSE	High	Master Protein	Dlo_pri0118F.1_g00210.1	Dlo_pri0118F.1_g00210.1	0	19.06	24	6	18	4	205	22.2	7.14	216	6	0	2	2.628	1.245	1.851	0.474	0.704	1.488	1	1	1	1	1	1	59.5	156.3	74	110.1	11.92	8.17	8.16	1.43	High	High	High	High	High	High	High	High	High	High	High	High
FALSE	High	Master Protein	Dlo_pri0088F.1_g03490.1	Dlo_pri0088F.1_g03490.1	0	29.947	20	7	18	7	421	46.4	7.65	399	7	0	0	0.852	1.003	0.907	1.178	1.065	0.904	1	1	1	1	1	1	106.3	90.6	106.7	96.4	0.68	2.06	2.43	2.61	High	High	High	High	High	High	High	High	High	High	High	High
FALSE	High	Master Protein	Dlo_pri0132F.1_g02730.1	Dlo_pri0132F.1_g02730.1	0	35.393	22	6	18	6	306	34.8	8.75	478	6	0	0	0.626	0.939	0.67	1.501	1.07	0.713	1	1	1	1	1	1	123.7	77.4	116.2	82.8	2.04	4.1	2.6	2.78	High	High	High	High	High	High	High	High	High	High	High	High
FALSE	High	Master Protein	Dlo_pri0065F.1_g00700.1	Dlo_pri0065F.1_g00700.1	0	34.495	10	9	18	5	1036	115.9	5.26	344	9	0	4	1.18	0.949	1.114	0.804	0.943	1.173	0.505276	1	1	0.208774	1	1	94.3	111.3	89.5	105	3.85	5.66	3.78	2.26	High	High	High	High	High	High	High	High	High	High	High	High
FALSE	High	Master Protein	Dlo_pri0108F.1_g02590.1	Dlo_pri0108F.1_g02590.1	0	51.171	33	7	18	7	345	35.8	8.84	637	7	0	0	1.041	0.943	1.224	0.906	1.175	1.298	1	1	1	1	1	1	95.1	99	89.6	116.3	0.94	1.72	1.47	0.92	High	High	High	High	High	High	High	High	High	High	High	High
FALSE	High	Master Protein	Dlo_alt0138F-002-01.1_g00070.1	Dlo_alt0138F-002-01.1_g00070.1	0	30.98	16	6	18	6	419	47.8	6.09	382	6	0	0	0.739	0.913	0.831	1.236	1.125	0.91	1	1	1	1	1	1	114.9	84.8	104.9	95.4	1.41	3.43	2.94	0.65	High	High	High	High	High	High	High	High	High	High	High	High
FALSE	High	Master Protein	Dlo_pri0057F.1_g02340.1	Dlo_pri0057F.1_g02340.1	0	25.922	8	5	18	5	714	78.1	9.66	286	5	0	0	0.76	0.989	0.716	1.302	0.943	0.724	1	1	1	1	1	1	115.4	87.7	114.2	82.7	1.51	0.16	0.85	1.06	High	High	High	High	High	High	High	High	High	High	High	High
FALSE	High	Master Protein	Dlo_alt0218F-007-01.1_g00050.1	Dlo_alt0218F-007-01.1_g00050.1	0	30.818	21	6	17	1	349	37.1	7.96	337	6	0	0	0.685	0.99	0.664	1.444	0.969	0.671							119.8	82.1	118.6	79.5					Not Found	Not Found	High	Not Found	Not Found	High	Not Found	Not Found	High	Not Found	Not Found	High
FALSE	High	Master Protein	Dlo_pri0199F.1_g00850.1	Dlo_pri0199F.1_g00850.1	0	39.347	25	7	17	7	386	43.8	7.61	417	7	0	0	0.937	0.99	0.948	1.056	1.011	0.957	1	1	1	1	1	1	103.2	96.8	102.2	97.8	1.56	9.73	5.1	2.91	High	High	High	High	High	High	High	High	High	High	High	High
FALSE	High	Master Protein	Dlo_pri0692F.1_g00420.1	Dlo_pri0692F.1_g00420.1	0	44.641	18	9	17	8	609	68.5	7.36	426	9	0	1	0.843	0.91	0.946	1.08	1.123	1.039	1	1	1	1	1	1	108.1	91.1	98.4	102.3	3.75	3.07	2.8	4.18	High	High	High	High	High	High	High	High	High	High	High	High
FALSE	High	Master Protein	Dlo_pri0030F.1_g00990.1	Dlo_pri0030F.1_g00990.1	0	37.672	28	7	17	5	389	43.4	6.15	413	7	0	2	1.136	1.132	1.016	0.997	0.895	0.897	1	1	1	1	1	1	93.4	106.1	105.7	94.9	2.71	1.74	6.32	2.57	High	High	High	High	High	High	High	High	High	High	High	High
FALSE	High	Master Protein	Dlo_pri0050F.1_g04330.1	Dlo_pri0050F.1_g04330.1	0	36.165	10	9	17	6	1033	116.1	5.99	396	9	0	1	1.118	0.856	1.242	0.765	1.111	1.452	1	1	1	1	1	1	94.9	106.1	81.2	117.9	6.47	4.09	3.37	3.72	High	High	High	High	High	High	High	High	High	High	High	High
FALSE	High	Master Protein	Dlo_pri0161F.1_g02360.1	Dlo_pri0161F.1_g02360.1	0	38.455	29	4	17	2	287	30.6	6.57	786	4	0	0	1.03	1.229	1.063	1.193	1.032	0.865	1	1	1	1	1	1	92.5	95.3	113.7	98.4	10.55	5.07	2.29	8.47	High	High	High	High	High	High	High	High	High	High	High	High
FALSE	High	Master Protein	Dlo_pri0038F.1_g01580.1	Dlo_pri0038F.1_g01580.1	0	22.27	24	4	17	1	187	21.1	11.06	427	4	0	0	1.026	0.975	0.959	0.95	0.935	0.984	1	1	1	1	1	1	101	103.6	98.5	96.9	4.8	1.78	5.21	4.77	High	High	High	High	High	High	High	High	High	High	High	High
FALSE	High	Master Protein	Dlo_pri0159F.1_g01670.1	Dlo_pri0159F.1_g01670.1	0	38.607	10	7	17	7	745	83.7	9.04	394	7	0	0	1.133	1.051	1.085	0.927	0.958	1.033	1	1	1	1	1	1	93.7	106.2	98.4	101.7	0.96	1.98	3.5	1.9	High	High	High	High	High	High	High	High	High	High	High	High
FALSE	High	Master Protein	Dlo_pri0347F.1_g00500.1	Dlo_pri0347F.1_g00500.1	0	48.685	42	8	17	8	281	30.1	7.97	408	8	0	0	1.425	1.017	1.217	0.714	0.854	1.197	1	1	1	1	1	1	85.9	122.3	87.3	104.5	3.28	4	1.69	1.29	High	High	High	High	High	High	High	High	High	High	High	High
FALSE	High	Master Protein	Dlo_pri0060F.1_g02220.1	Dlo_pri0060F.1_g02220.1	0	44.666	15	7	17	7	538	57.6	7.11	446	7	0	0	0.588	0.895	0.687	1.521	1.167	0.767	1	1	1	1	1	1	126.2	74.2	112.9	86.7	3.85	1.77	4.12	11.31	High	High	High	High	High	High	High	High	High	High	High	High
FALSE	High	Master Protein	Dlo_pri0089F.1_g00810.1	Dlo_pri0089F.1_g00810.1	0	31.735	12	4	17	1	446	49.1	7.68	450	4	0	4	0.904	1.187	1.475	1.312	1.631	1.243	1	1	1	1	0.816541	1	87.6	79.2	104	129.2	9.26	14.41	6.78	8.76	High	High	High	High	High	High	High	High	High	High	High	High
FALSE	High	Master Protein	Dlo_pri0340F.1_g01180.1	Dlo_pri0340F.1_g01180.1	0	22.426	22	5	17	2	232	26.6	7.06	384	5	0	0	1.582	1.136	1.222	0.718	0.773	1.076	0.992364	1	1	1	1	1	81	128.1	92	99	1.31	0.3	1.09	1.53	High	High	High	High	High	High	High	High	High	High	High	High
FALSE	High	Master Protein	Dlo_pri0042F.1_g02530.1	Dlo_pri0042F.1_g02530.1	0	27.849	48	6	17	6	122	13.2	5.5	470	6	0	0	1.125	1.112	0.956	0.988	0.849	0.86	1	1	1	1	1	1	95.4	107.4	106.1	91.2	1.33	2.55	1.81	3.59	High	High	High	High	High	High	High	High	High	High	High	High
FALSE	High	Master Protein	Dlo_pri0105F.1_g00770.1	Dlo_pri0105F.1_g00770.1	0	39.78	25	8	17	7	417	44.8	9.44	380	8	0	1	0.862	1.114	0.92	1.292	1.068	0.826	1	1	1	1	1	1	102.7	88.5	114.4	94.5	1.37	5.34	4.12	1.45	High	High	High	High	High	High	High	High	High	High	High	High
FALSE	High	Master Protein	Dlo_pri0439F.1_g00400.1	Dlo_pri0439F.1_g00400.1	0	35.876	31	6	17	6	249	27	6.73	487	6	0	0	0.772	0.97	0.701	1.256	0.907	0.722	1	1	1	1	1	1	116.2	89.7	112.7	81.4	0.86	4.48	1.44	6.36	High	High	High	High	High	High	High	High	High	High	High	High
FALSE	High	Master Protein	Dlo_pri0262F.1_g00920.1	Dlo_pri0262F.1_g00920.1	0	22.027	28	6	17	4	195	21.5	8.05	267	6	0	0	3.644	1.015	1.992	0.279	0.547	1.962	1	1	1	1	1	1	52.3	190.5	53.1	104.1	15.48	12.35	26.71	0.2	High	High	High	High	High	High	High	High	High	High	High	High
FALSE	High	Master Protein	Dlo_pri0301F.1_g00090.1	Dlo_pri0301F.1_g00090.1	0	45.752	16	8	17	8	684	75.9	6.74	443	8	0	0	1.02	1.067	1.131	1.046	1.109	1.06	1	1	1	1	1	1	94.8	96.7	101.2	107.3	3.08	4.42	1.39	1.1	High	High	High	High	High	High	High	High	High	High	High	High
FALSE	High	Master Protein	Dlo_pri0147F.1_g00830.1	Dlo_pri0147F.1_g00830.1	0	34.143	11	7	17	2	688	76.7	6.55	381	7	0	0	0.915	1.023	0.927	1.118	1.013	0.906	1	1	1	1	1	1	103.5	94.7	105.9	95.9	2.88	8.24	1.54	5.72	High	High	High	High	High	High	High	High	High	High	High	High
FALSE	High	Master Protein	Dlo_pri0097F.1_g01700.1	Dlo_pri0097F.1_g01700.1	0	38.058	30	7	17	7	351	40.7	8.98	411	7	0	0	1.017	0.936	0.997	0.921	0.98	1.064	1	1	1	1	1	1	101.3	103	94.8	100.9	1.35	3.3	2.65	2.25	High	High	High	High	High	High	High	High	High	High	High	High
FALSE	High	Master Protein	Dlo_pri0065F.1_g02910.1	Dlo_pri0065F.1_g02910.1	0	27.766	31	3	17	2	124	13.7	5.01	441	3	0	0	1.277	1.086	1.061	0.851	0.831	0.977	1	1	1	1	1	1	90.4	115.5	98.2	95.9	0.8	1.55	0.78	1.89	High	High	High	High	High	High	High	High	High	High	High	High
FALSE	High	Master Protein	Dlo_pri0098F.1_g00980.1	Dlo_pri0098F.1_g00980.1	0	34.164	11	5	17	5	531	59.8	7.64	497	5	0	0	0.98	0.988	0.99	1.007	1.009	1.002	1	1	1	1	1	1	101.1	99.1	99.8	100	0.94	0.86	1.69	1.85	High	High	High	High	High	High	High	High	High	High	High	High
FALSE	High	Master Protein	Dlo_pri0001F.1_g05210.1	Dlo_pri0001F.1_g05210.1	0	17.226	8	3	17	1	355	40.3	6.33	420	3	0	0	0.882	0.937	0.946	1.062	1.072	1.009	1	1	1	1	1	1	106.3	93.7	99.5	100.5	3.48	4.45	3.44	0.35	High	High	High	High	High	High	High	High	High	High	High	High
FALSE	High	Master Protein	Dlo_pri0103F.1_g00850.1	Dlo_pri0103F.1_g00850.1	0	36.794	28	5	17	5	217	24.5	6.8	491	5	0	0	0.834	1.14	0.984	1.366	1.18	0.864	1	1	1	0.776711	1	1	101.1	84.3	115.2	99.5	1.31	3.03	2.6	0.08	High	High	High	High	High	High	High	High	High	High	High	High
FALSE	High	Master Protein	Dlo_pri0070F.1_g02860.1	Dlo_pri0070F.1_g02860.1	0	18.92	26	5	17	1	197	23	10.43	297	5	0	0	1.381	0.814	1.398	0.59	1.013	1.717							87.1	120.2	70.9	121.8					Not Found	Not Found	High	Not Found	Not Found	High	Not Found	Not Found	High	Not Found	Not Found	High
FALSE	High	Master Protein	Dlo_pri0057F.1_g02960.1	Dlo_pri0057F.1_g02960.1	0	42.141	23	8	17	8	453	49.4	5.86	456	8	0	0	0.941	1.056	1.437	1.122	1.526	1.361	1	1	1	1	1	1	90.2	84.9	95.3	129.6	1.41	2.02	2.65	2.1	High	High	High	High	High	High	High	High	High	High	High	High
FALSE	High	Master Protein	Dlo_pri0016F.1_g04200.1	Dlo_pri0016F.1_g04200.1	0	46.487	31	9	17	9	309	34.6	6.79	439	9	0	0	0.866	1.064	0.922	1.229	1.065	0.867	1	1	1	1	1	1	103.8	89.9	110.5	95.8	0.75	5.15	3.27	0.98	High	High	High	High	High	High	High	High	High	High	High	High
FALSE	High	Master Protein	Dlo_pri0342F.1_g00480.1	Dlo_pri0342F.1_g00480.1	0	29.607	41	7	17	7	204	22.8	6.65	393	7	0	0	1.013	1.069	0.896	1.055	0.884	0.838	1	1	1	1	1	1	100.5	101.9	107.5	90.1	1.85	0.79	1.56	2.91	High	High	High	High	High	High	High	High	High	High	High	High
FALSE	High	Master Protein	Dlo_pri0016F.1_g05750.1	Dlo_pri0016F.1_g05750.1	0	32.921	45	5	17	1	170	19.1	6.1	519	5	0	0	0.988	1.037	1.009	1.05	1.021	0.973	1	1	1	1	1	1	99.2	98	102.9	100	1.2	2.46	1.24	1.78	High	High	High	High	High	High	High	High	High	High	High	High
FALSE	High	Master Protein	Dlo_pri0369F.1_g01120.1	Dlo_pri0369F.1_g01120.1	0	45.653	35	9	17	6	332	35.2	5.95	482	9	0	4	0.998	1.151	1.081	1.152	1.083	0.94	1	1	1	1	1	1	94.6	94.4	108.8	102.2	3.64	9.39	11.03	3.2	High	High	High	High	High	High	High	High	High	High	High	High
FALSE	High	Master Protein	Dlo_pri0199F.1_g01370.1	Dlo_pri0199F.1_g01370.1	0	27.53	36	6	17	2	219	25.3	6.24	397	6	0	0	1.442	0.99	1.137	0.687	0.789	1.148	1	1	1	1	1	1	87.5	126.2	86.7	99.6	7.94	5.88	3.62	2.69	High	Not Found	High	High	Not Found	High	High	Not Found	High	High	Not Found	High
FALSE	High	Master Protein	Dlo_pri0099F.1_g02500.1	Dlo_pri0099F.1_g02500.1	0	39.959	22	6	17	6	425	48	8.13	506	6	0	0	1.133	0.912	1.128	0.805	0.996	1.237	1	1	1	1	1	1	95.8	108.6	87.4	108.1	1.46	2.71	5.38	0.33	High	High	High	High	High	High	High	High	High	High	High	High
FALSE	High	Master Protein	Dlo_pri0433F.1_g00470.1	Dlo_pri0433F.1_g00470.1	0	40.078	12	3	17	3	356	37.4	6.44	638	3	0	0	1.147	0.773	1.264	0.674	1.102	1.634	1	1	1	1	1	1	95.6	109.6	73.9	120.8	3.3	3.54	10.69	6.26	High	High	High	High	High	High	High	High	High	High	High	High
FALSE	High	Master Protein	Dlo_pri0362F.1_g00590.1	Dlo_pri0362F.1_g00590.1	0	43.246	27	8	17	8	402	41.2	9.01	439	8	0	0	0.82	1.001	0.821	1.22	1.001	0.82	1	1	1	1	1	1	109.8	90.1	109.9	90.2	3.9	4.23	3.28	4.23	High	High	High	High	High	High	High	High	High	High	High	High
FALSE	High	Master Protein	Dlo_pri0361F.1_g00130.1	Dlo_pri0361F.1_g00130.1	0	52.126	30	8	17	5	315	35.8	8.02	466	8	0	0	0.989	1.028	0.887	1.04	0.897	0.863	1	1	1	1	1	1	102.5	101.3	105.3	90.9	1.13	3.29	3.94	0.77	High	High	High	High	High	High	High	High	High	High	High	High
FALSE	High	Master Protein	Dlo_pri0226F.1_g00210.1	Dlo_pri0226F.1_g00210.1	0	20.134	24	7	17	3	283	32.9	8.5	256	7	0	0	0.913	0.896	0.875	0.981	0.959	0.977	1	1	1	1	1	1	108.6	99.1	97.2	95	5.35	12.29	3.31	5.36	High	High	High	High	High	High	High	High	High	High	High	High
FALSE	High	Master Protein	Dlo_pri0113F.1_g00350.1	Dlo_pri0113F.1_g00350.1	0	22.984	21	4	17	1	196	22.6	10.35	495	4	0	0	1.284	0.924	0.945	0.719	0.736	1.024	1	1	1	1	1	1	96.3	123.7	89	91.1	1.98	2.43	3.19	3.16	High	High	High	High	High	High	High	High	High	High	High	High
FALSE	High	Master Protein	Dlo_alt0004F-051-01.1_g00030.1	Dlo_alt0004F-051-01.1_g00030.1	0	33.444	9	7	17	7	805	89.5	8.44	452	7	0	0	1.238	0.972	1.115	0.785	0.901	1.148	1	1	1	1	1	1	92.5	114.5	89.9	103.2	3.35	2.8	2.1	1.28	High	High	High	High	High	High	High	High	High	High	High	High
FALSE	High	Master Protein	Dlo_pri0001F.1_g08130.1	Dlo_pri0001F.1_g08130.1	0	24.594	24	6	16	2	276	29.4	8.06	402	6	0	4	1.031	0.926	0.87	0.898	0.844	0.94	1	1	1	1	1	1	104.5	107.8	96.7	91	1.75	3.13	2.16	1.87	Not Found	High	High	Not Found	High	High	Not Found	High	High	Not Found	High	High
FALSE	High	Master Protein	Dlo_pri0076F.1_g01040.1	Dlo_pri0076F.1_g01040.1	0	31.715	29	6	16	2	258	28.9	6.7	335	6	0	0	0.942	0.977	1.023	1.037	1.086	1.047	1	1	1	1	1	1	101.5	95.6	99.1	103.8	6.55	3.15	1.24	2.51	High	High	High	High	High	High	High	High	High	High	High	High
FALSE	High	Master Protein	Dlo_pri0067F.1_g00720.1	Dlo_pri0067F.1_g00720.1	0	37.454	20	2	16	1	152	17.3	7.42	476	2	0	0	0.509	1.01	0.727	1.983	1.428	0.72	1	1	1	1	1	1	123.2	62.7	124.4	89.6	2.86	27.01	13.97	3.36	High	High	High	High	High	High	High	High	High	High	High	High
FALSE	High	Master Protein	Dlo_alt0120F-008-01.1_g00060.1	Dlo_alt0120F-008-01.1_g00060.1	0	36.242	26	5	16	5	265	30.3	6.47	429	5	0	0	1.387	1.229	1.171	0.886	0.844	0.953	0.489839	1	1	1	1	1	83.6	115.9	102.7	97.9	3.84	3.06	3.96	2.05	High	High	High	High	High	High	High	High	High	High	High	High
FALSE	High	Master Protein	Dlo_pri0046F.1_g03020.1	Dlo_pri0046F.1_g03020.1	0	28.962	13	6	16	6	494	55.2	6.14	299	6	0	0	0.829	1.167	1	1.408	1.206	0.857	1	1	1	1	1	1	100.1	83	116.8	100.1	6.79	4.35	5.39	2.09	High	High	High	High	High	High	High	High	High	High	High	High
FALSE	High	Master Protein	Dlo_pri0146F.1_g01350.1	Dlo_pri0146F.1_g01350.1	0	26.381	11	4	16	4	418	44.7	6.39	461	4	0	0	1.226	0.907	1.175	0.74	0.958	1.295	1	1	1	1	1	1	92.9	113.9	84.2	109.1	0.87	0.31	0.98	1.11	High	High	High	High	High	High	High	High	High	High	High	High
FALSE	High	Master Protein	Dlo_pri0026F.1_g01380.1	Dlo_pri0026F.1_g01380.1	0	28.566	15	6	16	6	360	40.5	5.19	370	6	0	0	0.515	0.971	0.846	1.885	1.642	0.871	1	1	1	1	1	1	120.1	61.8	116.6	101.5	2.61	6.42	2.48	2.04	High	High	High	High	High	High	High	High	High	High	High	High
FALSE	High	Master Protein	Dlo_pri0041F.1_g01140.1	Dlo_pri0041F.1_g01140.1	0	24.838	12	4	16	4	336	37.2	7.97	475	4	0	0	0.831	1.044	0.973	1.257	1.171	0.931	1	1	1	1	1	1	104	86.4	108.6	101.1	0.86	1.04	1.36	0.36	High	High	High	High	High	High	High	High	High	High	High	High
FALSE	High	Master Protein	Dlo_pri0004F.1_g04310.1	Dlo_pri0004F.1_g04310.1	0	26.073	15	3	16	2	210	23.7	4.93	387	3	0	0	0.643	1.126	0.822	1.753	1.28	0.73	1	1	1	1	1	1	111.4	71.6	125.5	91.6	1.1	2.84	0.76	3.29	High	High	High	High	High	High	High	High	High	High	High	High
FALSE	High	Master Protein	Dlo_pri0002F.1_g02960.1	Dlo_pri0002F.1_g02960.1	0	19.727	18	4	16	3	233	26	10.14	383	4	0	0	0.901	0.867	0.989	0.961	1.097	1.141	1	1	1	1	1	1	106.5	96	92.3	105.3	2.21	3.91	1.03	0.85	High	High	High	High	High	High	High	High	High	High	High	High
FALSE	High	Master Protein	Dlo_pri0526F.1_g00090.1	Dlo_pri0526F.1_g00090.1	0	31.638	17	8	16	8	522	59	7.78	410	8	0	0	1.091	0.893	0.959	0.819	0.879	1.073	1	1	1	1	1	1	101.4	110.7	90.6	97.3	0.53	0.79	2.29	2.33	High	High	High	High	High	High	High	High	High	High	High	High
FALSE	High	Master Protein	Dlo_pri0079F.1_g02010.1	Dlo_pri0079F.1_g02010.1	0	36.393	10	6	16	6	974	108.2	6.51	477	6	0	0	1.004	1.185	1.071	1.181	1.067	0.903	1	1	1	1	1	1	93.9	94.2	111.3	100.6	1.85	2.35	1.33	4.16	High	High	High	High	High	High	High	High	High	High	High	High
FALSE	High	Master Protein	Dlo_pri0347F.1_g00880.1	Dlo_pri0347F.1_g00880.1	0	20.816	44	6	16	3	161	16.4	5.63	315	6	0	0	0.823	1.05	0.711	1.277	0.864	0.677	1	1	1	1	1	1	111.6	91.8	117.2	79.4	0.84	6.41	11.75	8.48	High	High	High	High	High	High	High	High	High	High	High	High
FALSE	High	Master Protein	Dlo_pri0502F.1_g00470.1	Dlo_pri0502F.1_g00470.1	0	26.98	25	4	16	2	216	24.6	6.54	444	4	0	0	1.149	1.257	0.988	1.094	0.86	0.786	1	1	1	1	1	1	91	104.6	114.4	90	1.52	4.85	3.98	8.56	High	High	High	High	High	High	High	High	High	High	High	High
FALSE	High	Master Protein	Dlo_pri0569F.1_g00260.1	Dlo_pri0569F.1_g00260.1	0	42.609	9	10	16	10	1495	168.8	8.75	443	10	0	0	1.715	1.077	2.238	0.628	1.305	2.078	0.522777	1	0.157773	0.873622	1	0.166591	66.3	113.8	71.4	148.5	4.58	3.46	4.66	2.1	High	High	High	High	High	High	High	High	High	High	High	High
FALSE	High	Master Protein	Dlo_pri0159F.1_g01380.1	Dlo_pri0159F.1_g01380.1	0	28.331	7	7	16	7	1036	115.6	9.32	341	7	0	0	0.924	1.021	0.897	1.106	0.971	0.878	1	1	1	1	1	1	104.1	96.2	106.3	93.4	1.37	2.37	2.11	1.53	High	High	High	High	High	High	High	High	High	High	High	High
FALSE	High	Master Protein	Dlo_pri0107F.1_g00690.1	Dlo_pri0107F.1_g00690.1	0	37.571	11	8	16	8	740	83.5	7.77	423	8	0	0	0.79	0.771	1.077	0.976	1.364	1.397	1	1	1	1	1	1	110	86.8	84.8	118.4	3.89	8.17	3.56	1.86	High	High	High	High	High	High	High	High	High	High	High	High
FALSE	High	Master Protein	Dlo_pri0001F.1_g01590.1	Dlo_pri0001F.1_g01590.1	0	27.053	14	3	16	1	359	38.2	8.87	524	3	0	0	0.678	0.89	0.701	1.313	1.035	0.788	1	1	1	1	1	1	122.4	82.9	108.9	85.8	4.14	3.65	4.47	15.01	High	Not Found	High	High	Not Found	High	High	Not Found	High	High	Not Found	High
FALSE	High	Master Protein	Dlo_pri0070F.1_g01650.1	Dlo_pri0070F.1_g01650.1	0	46.752	26	9	16	7	415	45.6	6.95	419	9	0	2	1.053	1.053	1.381	1	1.311	1.311	1	1	1	1	1	1	89.1	93.9	93.9	123.1	0.62	3.4	0.97	1.62	High	High	High	High	High	High	High	High	High	High	High	High
FALSE	High	Master Protein	Dlo_alt0164F-010-01.1_g00020.1	Dlo_alt0164F-010-01.1_g00020.1	0	22.705	22	5	16	3	209	22.9	9.35	329	5	0	2	1.024	0.957	0.994	0.935	0.97	1.038	1	1	1	1	1	1	100.6	103.1	96.3	100	10.73	0.63	4.31	6.98	High	High	High	High	High	High	High	High	High	High	High	High
FALSE	High	Master Protein	Dlo_pri0822F.1_g00280.1	Dlo_pri0822F.1_g00280.1	0	23.744	25	7	16	7	274	31.4	5.11	275	7	0	0	0.883	1.05	0.948	1.19	1.074	0.903	1	1	1	1	1	1	103.1	91	108.3	97.7	5.09	3.9	9.66	11.03	High	High	High	High	High	High	High	High	High	High	High	High
FALSE	High	Master Protein	Dlo_pri0686F.1_g00320.1	Dlo_pri0686F.1_g00320.1	0	62.204	31	7	16	7	329	37.4	7.59	498	7	0	0	1.02	1.087	0.996	1.066	0.977	0.917	1	1	1	1	1	1	97.5	99.4	106	97.1	11.26	14.64	13.32	9.01	High	High	High	High	High	High	High	High	High	High	High	High
FALSE	High	Master Protein	Dlo_pri0158F.1_g01490.1	Dlo_pri0158F.1_g01490.1	0	27.633	15	6	16	6	428	47.3	5.01	325	6	0	0	0.912	0.992	0.789	1.088	0.865	0.796	1	1	1	1	1	1	108.3	98.8	107.4	85.5	1.46	0.82	0.27	1.06	High	High	High	High	High	High	High	High	High	High	High	High
FALSE	High	Master Protein	Dlo_alt0362F-001-01.1_g00040.1	Dlo_alt0362F-001-01.1_g00040.1	0	37.389	19	7	16	7	480	52.3	8.75	384	7	0	0	0.805	1.094	1.003	1.36	1.246	0.916	1	1	1	1	1	1	102.5	82.5	112.2	102.8	3.01	7.4	3.37	0.9	High	High	High	High	High	High	High	High	High	High	High	High
FALSE	High	Master Protein	Dlo_pri0320F.1_g01250.1	Dlo_pri0320F.1_g01250.1	0	19.028	14	4	16	1	296	33.7	10.33	387	4	0	0	0.978	1.015	0.984	1.037	1.006	0.97	1	1	1	1	1	1	100.6	98.4	102.1	99	0.98	1.72	2.55	0.07	High	High	Not Found	High	High	Not Found	High	High	Not Found	High	High	Not Found
FALSE	High	Master Protein	Dlo_pri0435F.1_g00390.1	Dlo_pri0435F.1_g00390.1	0	31.702	13	6	16	4	576	60.9	7.91	345	6	0	0	0.757	1.317	0.804	1.74	1.062	0.61	1	1	1	1	1	1	103.2	78.1	135.8	82.9	2.17	2.49	5.13	4.92	High	High	High	High	High	High	High	High	High	High	High	High
FALSE	High	Master Protein	Dlo_pri0802F.1_g00420.1	Dlo_pri0802F.1_g00420.1	0	14.667	5	3	16	2	734	78.6	5.12	407	3	0	0	0.773	0.995	0.894	1.287	1.156	0.898	1	1	1	1	1	1	109.2	84.5	108.7	97.6	3.01	4.31	1.74	2.99	High	High	High	High	High	High	High	High	High	High	High	High
FALSE	High	Master Protein	Dlo_alt0010F-008-01.1_g00030.1	Dlo_alt0010F-008-01.1_g00030.1	0	29.455	4	5	16	1	1438	162.1	7.53	421	5	0	0	1.632	1.386	1.781	0.849	1.092	1.286	1	1	1	1	1	1	69	112.6	95.6	122.9	0.92	1.7	2.24	1.61	High	High	High	High	High	High	High	High	High	High	High	High
FALSE	High	Master Protein	Dlo_pri0015F.1_g03980.1	Dlo_pri0015F.1_g03980.1	0	26.96	42	5	16	5	124	14	9.55	389	5	0	0	1.149	0.927	0.978	0.806	0.851	1.056	1	1	1	1	1	1	98.7	113.4	91.4	96.5	2.44	3.58	1.68	0.5	High	High	High	High	High	High	High	High	High	High	High	High
FALSE	High	Master Protein	Dlo_pri0177F.1_g01090.1	Dlo_pri0177F.1_g01090.1	0	45.426	26	9	16	4	432	48	7.46	424	9	0	5	1.142	1.023	1.001	0.896	0.876	0.978	1	1	1	1	1	1	96	109.7	98.2	96.1	0.78	3.08	3.33	0.59	High	High	High	High	High	High	High	High	High	High	High	High
FALSE	High	Master Protein	Dlo_alt0439F-003-01.1_g00170.1	Dlo_alt0439F-003-01.1_g00170.1	0	43.677	29	7	16	7	342	39.5	5.62	374	7	0	0	0.71	0.854	0.805	1.203	1.134	0.943	1	1	1	1	1	1	118.7	84.3	101.4	95.6	1.9	5.63	12.45	11.71	High	High	High	High	High	High	High	High	High	High	High	High
FALSE	High	Master Protein	Dlo_pri0036F.1_g00400.1	Dlo_pri0036F.1_g00400.1	0	41.95	24	10	16	3	494	54.5	6.47	350	10	0	1	0.603	0.618	0.634	1.025	1.053	1.027	1	1	1	1	1	1	140.1	84.4	86.6	88.9	9.62	1.46	11.27	2.8	High	Not Found	High	High	Not Found	High	High	Not Found	High	High	Not Found	High
FALSE	High	Master Protein	Dlo_pri0113F.1_g02650.1	Dlo_pri0113F.1_g02650.1	0	37.848	15	6	16	5	549	62.1	6.84	490	6	0	0	1.068	0.854	1.12	0.799	1.048	1.311	1	1	1	1	1	1	98.9	105.7	84.5	110.8	1.82	3.98	4.28	3.64	High	High	High	High	High	High	High	High	High	High	High	High
FALSE	High	Master Protein	Dlo_pri0328F.1_g00340.1	Dlo_pri0328F.1_g00340.1	0	21.71	12	4	16	4	323	35.1	4.59	301	4	0	0	0.8	1.106	0.796	1.382	0.995	0.72	1	1	1	1	1	1	108.1	86.4	119.5	86	0.55	1.06	1.03	1.07	High	High	High	High	High	High	High	High	High	High	High	High
FALSE	High	Master Protein	Dlo_pri0236F.1_g00180.1	Dlo_pri0236F.1_g00180.1	0	24.762	48	6	16	4	146	16.4	10.49	380	6	0	3	1.001	0.977	0.929	0.976	0.928	0.951	1	1	1	1	1	1	102.4	102.5	100	95.1	3.02	4.51	2.34	0.35	High	High	High	High	High	High	High	High	High	High	High	High
FALSE	High	Master Protein	Dlo_pri0015F.1_g01430.1	Dlo_pri0015F.1_g01430.1	0	22.032	29	3	16	3	123	14.6	9.48	438	3	0	0	0.832	0.796	1.031	0.956	1.239	1.296	1	1	1	1	1	1	109.3	91	87	112.7	0.79	5.71	10.23	4.69	High	High	High	High	High	High	High	High	High	High	High	High
FALSE	High	Master Protein	Dlo_pri0455F.1_g00470.1	Dlo_pri0455F.1_g00470.1	0	23.142	40	4	16	4	144	16	5.11	434	4	0	0	0.978	0.83	0.844	0.849	0.863	1.017	1	1	1	1	1	1	109.5	107.1	90.9	92.4	1.57	2.45	0.76	1.48	High	High	High	High	High	High	High	High	High	High	High	High
FALSE	High	Master Protein	Dlo_pri0230F.1_g00850.1	Dlo_pri0230F.1_g00850.1	0	28.563	15	5	16	5	430	47.8	5.72	395	5	0	0	0.604	0.916	0.735	1.518	1.218	0.803	1	1	1	1	1	1	122.9	74.2	112.6	90.4	2.61	1.88	5.59	5.17	High	High	High	High	High	High	High	High	High	High	High	High
FALSE	High	Master Protein	Dlo_pri0509F.1_g00120.1	Dlo_pri0509F.1_g00120.1	0	19.701	36	5	16	5	122	14.2	8.81	397	5	0	0	0.769	1.066	0.812	1.387	1.055	0.761	1	1	1	1	1	1	109.7	84.3	117	89	4.32	2.44	6.83	3.95	High	High	High	High	High	High	High	High	High	High	High	High
FALSE	High	Master Protein	Dlo_pri0047F.1_g04120.1	Dlo_pri0047F.1_g04120.1	0	32.358	4	7	16	6	2139	234.6	4.89	457	7	0	1	0.938	1.022	0.938	1.089	1	0.918	1	1	1	1	1	1	102.6	96.3	104.9	96.2	3.23	3.28	7.16	1.47	High	High	High	High	High	High	High	High	High	High	High	High
FALSE	High	Master Protein	Dlo_pri0721F-1.1_g00080.1	Dlo_pri0721F-1.1_g00080.1	0	45.198	17	3	16	3	302	32.5	7.33	593	3	0	0	0.747	1.029	1.445	1.377	1.934	1.404	1	1	1	1	1	1	94.8	70.8	97.5	136.9	3.88	1.81	2.77	1.54	High	High	High	High	High	High	High	High	High	High	High	High
FALSE	High	Master Protein	Dlo_pri0248F.1_g01900.1	Dlo_pri0248F.1_g01900.1	0	36.631	14	5	16	5	370	40.9	6.84	497	5	0	0	1.304	1.155	1.25	0.886	0.959	1.082	1	1	1	1	1	1	85	110.7	98.1	106.2	4.14	2.67	1.94	1.4	High	High	High	High	High	High	High	High	High	High	High	High
FALSE	High	Master Protein	Dlo_pri0023F.1_g03600.1	Dlo_pri0023F.1_g03600.1	0	29.715	18	8	16	8	467	53.5	8.22	286	8	0	0	0.876	1.074	0.886	1.226	1.012	0.825	1	1	1	1	1	1	104.3	91.4	112	92.4	0.71	2.88	3.4	0.64	High	High	High	High	High	High	High	High	High	High	High	High
FALSE	High	Master Protein	Dlo_pri0384F.1_g00030.1	Dlo_pri0384F.1_g00030.1	0	56.923	34	6	16	6	225	25.2	5.74	457	6	0	0	0.997	0.846	1.094	0.849	1.097	1.292	1	1	1	1	1	1	101.6	101.3	86	111.1	0.82	1.95	3.98	1.47	High	High	High	High	High	High	High	High	High	High	High	High
FALSE	High	Master Protein	Dlo_pri0190F.1_g01640.1	Dlo_pri0190F.1_g01640.1	0	31.972	14	5	16	1	436	49	5.6	562	5	0	0	1.369	1.051	1.206	0.768	0.881	1.147	1	1	1	1	1	1	86.5	118.4	90.9	104.3	1.76	1.83	2.93	6.08	Not Found	High	High	Not Found	High	High	Not Found	High	High	Not Found	High	High
FALSE	High	Master Protein	Dlo_pri0055F.1_g04450.1	Dlo_pri0055F.1_g04450.1	0	39.939	31	5	16	5	258	28.8	7.21	491	5	0	0	1.465	1.088	0.999	0.743	0.681	0.917	1	1	1	1	1	1	87.9	128.8	95.6	87.7	0.89	1.18	1.61	0.97	High	High	High	High	High	High	High	High	High	High	High	High
FALSE	High	Master Protein	Dlo_pri0015F.1_g03510.1	Dlo_pri0015F.1_g03510.1	0	55.112	38	8	15	8	304	32.2	8.07	375	8	0	0	1.062	1.002	0.952	0.943	0.896	0.95	1	1	1	1	1	1	99.6	105.8	99.8	94.8	1.46	0.47	0.8	0.71	High	High	High	High	High	High	High	High	High	High	High	High
FALSE	High	Master Protein	Dlo_pri0694F.1_g00260.1	Dlo_pri0694F.1_g00260.1	0	22.889	11	4	15	4	408	45.2	7.15	406	4	0	0	1.166	0.995	1.067	0.853	0.915	1.073	1	1	1	1	1	1	94.6	110.4	94.1	100.9	2.69	3.81	2.47	0.96	High	High	High	High	High	High	High	High	High	High	High	High
FALSE	High	Master Protein	Dlo_pri0327F.1_g00280.1	Dlo_pri0327F.1_g00280.1	0	42.794	23	9	15	9	468	50.7	8.35	338	9	0	0	1.004	0.904	1.059	0.901	1.055	1.171	1	1	1	1	1	0.213432	100.8	101.2	91.2	106.8	2.36	1.54	1.28	2.16	High	High	High	High	High	High	High	High	High	High	High	High
FALSE	High	Master Protein	Dlo_pri0016F.1_g05700.1	Dlo_pri0016F.1_g05700.1	0	18.621	50	4	15	1	76	8.8	9.58	421	4	0	0	0.994	1.023	1.016	1.03	1.023	0.993							99.2	98.5	101.5	100.8					Not Found	High	Not Found	Not Found	High	Not Found	Not Found	High	Not Found	Not Found	High	Not Found
FALSE	High	Master Protein	Dlo_pri0016F.1_g05660.1	Dlo_pri0016F.1_g05660.1	0	21.777	10	5	15	1	471	50.9	7.66	394	5	0	0	0.864	1.121	0.886	1.298	1.026	0.79							103.3	89.2	115.9	91.6					Not Found	High	Not Found	Not Found	High	Not Found	Not Found	High	Not Found	Not Found	High	Not Found
FALSE	High	Master Protein	Dlo_pri0235F.1_g00430.1	Dlo_pri0235F.1_g00430.1	0	30.965	19	7	15	7	471	51.5	6.65	389	7	0	0	0.981	0.915	1.079	0.933	1.1	1.18	1	1	1	1	1	1	100.6	98.7	92.1	108.6	1.47	1.14	0.15	0.3	High	High	High	High	High	High	High	High	High	High	High	High
FALSE	High	Master Protein	Dlo_pri0039F.1_g01830.1	Dlo_pri0039F.1_g01830.1	0	14.652	13	2	15	2	180	20.7	8.76	416	2	0	0	1.12	0.86	0.974	0.768	0.87	1.133	1	1	1	0.505972	1	1	101.1	113.3	87	98.6	4.75	3.37	2.68	3.09	High	High	High	High	High	High	High	High	High	High	High	High
FALSE	High	Master Protein	Dlo_pri0108F.1_g02600.1	Dlo_pri0108F.1_g02600.1	0	47.415	21	8	15	6	496	53.2	6.33	536	8	0	2	0.94	0.969	0.888	1.031	0.945	0.917	1	1	1	1	1	1	105.3	99	102.1	93.6	2.4	4.17	0.39	2.11	High	High	High	High	High	High	High	High	High	High	High	High
FALSE	High	Master Protein	Dlo_alt0053F-013-01.1_g00120.1	Dlo_alt0053F-013-01.1_g00120.1	0	28.059	33	5	15	2	160	18.3	10.58	366	5	0	3	1.268	0.978	1.01	0.771	0.796	1.033	1	1	1	1	1	1	94	119.2	91.9	94.9	1.57	1.02	1.24	1.16	High	High	High	High	High	High	High	High	High	High	High	High
FALSE	High	Master Protein	Dlo_pri0006F.1_g00630.1	Dlo_pri0006F.1_g00630.1	0	24.841	23	5	15	1	342	39.4	6.1	325	5	0	0	1.17	1.108	0.82	0.947	0.701	0.74							97.6	114.2	108.1	80.1					Not Found	High	Not Found	Not Found	High	Not Found	Not Found	High	Not Found	Not Found	High	Not Found
FALSE	High	Master Protein	Dlo_pri0002F.1_g06650.1	Dlo_pri0002F.1_g06650.1	0	42.968	22	8	15	6	497	53.8	6.62	406	8	0	0	1.107	1.099	0.933	0.993	0.843	0.849	1	1	1	1	1	1	96.6	107	106.2	90.2	6.5	7.27	3.05	3.75	High	High	High	High	High	High	High	High	High	High	High	High
FALSE	High	Master Protein	Dlo_alt0023F-008-01.1_g00010.1	Dlo_alt0023F-008-01.1_g00010.1	0	16.337	20	4	15	4	202	23	7.17	300	4	0	0	0.804	1.068	0.855	1.328	1.063	0.8	1	1	1	1	1	1	107.3	86.3	114.6	91.8	0.07	2.15	1.7	1.45	High	High	High	High	High	High	High	High	High	High	High	High
FALSE	High	Master Protein	Dlo_pri0265F.1_g01220.1	Dlo_pri0265F.1_g01220.1	0	37.831	45	4	15	3	135	15.1	5.14	418	4	0	0	1.077	1.011	0.965	0.939	0.896	0.954	1	1	1	1	1	1	98.7	106.3	99.8	95.2	1.01	1.34	4.68	5.48	High	High	High	High	High	High	High	High	High	High	High	High
FALSE	High	Master Protein	Dlo_pri0084F.1_g01660.1	Dlo_pri0084F.1_g01660.1	0	23.505	23	4	15	2	201	22.5	5.69	336	4	0	0	0.956	0.928	1.016	0.971	1.063	1.094	1	1	1	1	1	1	102.6	98	95.2	104.2	1.57	0.76	2.6	0.92	High	High	High	High	High	High	High	High	High	High	High	High
FALSE	High	Master Protein	Dlo_pri0038F.1_g00520.1	Dlo_pri0038F.1_g00520.1	0	34.419	31	8	15	8	362	39	6.9	364	8	0	0	1.103	1.011	1.194	0.916	1.082	1.181	1	1	1	1	1	1	92.9	102.4	93.9	110.8	3.84	1.71	1.85	2.42	High	High	High	High	High	High	High	High	High	High	High	High
FALSE	High	Master Protein	Dlo_pri0563F.1_g00110.1	Dlo_pri0563F.1_g00110.1	0	32.859	33	7	15	5	255	27.7	6.04	464	7	0	2	1.363	0.988	1.043	0.725	0.765	1.056	1	1	1	1	1	1	91	124.1	89.9	95	0.67	1.28	2.58	0.49	High	High	High	High	High	High	High	High	High	High	High	High
FALSE	High	Master Protein	Dlo_pri0215F.1_g00860.1	Dlo_pri0215F.1_g00860.1	0	23.401	18	5	15	5	384	43.2	7.21	342	5	0	0	3.57	1.652	1.631	0.463	0.457	0.987	0.00036015	0.188027	0.157669	0.00557354	0.00916633	1	50.9	181.9	84.1	83.1	5.04	1.71	2.27	4.75	High	High	High	High	High	High	High	High	High	High	High	High
FALSE	High	Master Protein	Dlo_pri0039F.1_g00430.1	Dlo_pri0039F.1_g00430.1	0	36.457	14	5	15	5	409	44.6	6.61	400	5	0	0	1.218	0.94	1.001	0.771	0.821	1.065	1	1	1	1	1	1	96.2	117.2	90.4	96.2	1.93	2.66	1.57	3.03	High	High	High	High	High	High	High	High	High	High	High	High
FALSE	High	Master Protein	Dlo_pri0000F.1_g04490.1	Dlo_pri0000F.1_g04490.1	0	27.503	24	7	15	7	392	42.2	5.41	291	7	0	0	1.052	0.929	1.088	0.883	1.035	1.172	1	1	1	1	1	1	98.3	103.4	91.3	107	8.91	3.71	3.9	5.09	High	High	High	High	High	High	High	High	High	High	High	High
FALSE	High	Master Protein	Dlo_pri0018F.1_g00590.1	Dlo_pri0018F.1_g00590.1	0	26.501	20	7	15	7	363	38.5	8.22	428	7	0	0	0.94	1.022	0.979	1.088	1.041	0.957	1	1	1	1	1	1	101.5	95.4	103.8	99.3	1.64	4.78	2.88	2.88	High	High	High	High	High	High	High	High	High	High	High	High
FALSE	High	Master Protein	Dlo_pri1202F.1_g00040.1	Dlo_pri1202F.1_g00040.1	0	30.815	20	6	15	6	364	40	9.25	411	6	0	0	1.663	1.052	1.405	0.632	0.845	1.336	1	1	1	1	1	1	78.1	129.9	82.2	109.8	1.42	0.3	2.46	0.89	High	High	High	High	High	High	High	High	High	High	High	High
FALSE	High	Master Protein	Dlo_pri0077F.1_g00630.1	Dlo_pri0077F.1_g00630.1	0	28.999	27	6	15	1	215	24	4.84	331	6	0	5	0.917	0.891	0.871	0.971	0.95	0.979	1	1	1	1	1	1	108.7	99.7	96.8	94.7	4.57	2.3	2.05	1.25	High	High	Not Found	High	High	Not Found	High	High	Not Found	High	High	Not Found
FALSE	High	Master Protein	Dlo_pri0053F.1_g02750.1	Dlo_pri0053F.1_g02750.1	0	30.908	46	5	15	5	138	15.5	6.27	296	5	0	0	1.287	0.909	0.937	0.706	0.728	1.03	1	1	1	1	1	1	96.8	124.6	88	90.6	0.26	0.72	0.78	0.53	High	High	High	High	High	High	High	High	High	High	High	High
FALSE	High	Master Protein	Dlo_pri0430F.1_g00680.1	Dlo_pri0430F.1_g00680.1	0	18.615	27	4	15	4	179	19.9	9.76	329	4	0	0	0.821	0.94	0.967	1.145	1.178	1.029	1	1	1	1	1	1	107.3	88.1	100.9	103.8	1.32	4.71	3.28	1.15	High	High	High	High	High	High	High	High	High	High	High	High
FALSE	High	Master Protein	Dlo_pri0042F.1_g03840.1	Dlo_pri0042F.1_g03840.1	0	15.936	12	4	15	2	353	38.6	6.54	244	4	0	2	1.184	1.059	1.02	0.894	0.861	0.963	1	1	1	1	1	1	93.8	111.1	99.4	95.7	2.42	2	1.92	1.93	High	High	High	High	High	High	High	High	High	High	High	High
FALSE	High	Master Protein	Dlo_pri0268F.1_g01300.1	Dlo_pri0268F.1_g01300.1	0	39.028	63	7	15	7	150	16.4	10.7	409	7	0	0	0.635	0.999	0.943	1.574	1.485	0.944	1	1	1	1	1	1	111.8	71	111.7	105.4	6.53	32.78	9.9	5.02	High	High	High	High	High	High	High	High	High	High	High	High
FALSE	High	Master Protein	Dlo_alt0015F-010-01.1_g00050.1	Dlo_alt0015F-010-01.1_g00050.1	0	28.78	6	4	15	4	831	92.5	8.4	355	4	0	0	0.847	0.942	0.963	1.112	1.137	1.022	1	1	1	1	1	1	106.6	90.3	100.4	102.7	2.42	3.32	1.7	3.65	High	High	High	High	High	High	High	High	High	High	High	High
FALSE	High	Master Protein	Dlo_pri0198F.1_g01000.1	Dlo_pri0198F.1_g01000.1	0	33.519	17	6	15	6	471	51.2	5.97	372	6	0	0	1.397	1.091	1.144	0.781	0.819	1.049	1	1	1	1	1	1	86.3	120.6	94.2	98.8	1.62	0.42	1.6	0.58	High	High	High	High	High	High	High	High	High	High	High	High
FALSE	High	Master Protein	Dlo_pri0030F.1_g04280.1	Dlo_pri0030F.1_g04280.1	0	25.627	40	4	15	2	140	16.3	5.72	425	4	0	0	0.874	0.921	0.733	1.054	0.839	0.796	1	1	1	1	1	1	113.4	99.1	104.4	83.1	2.22	0.63	1.48	2.45	High	High	High	High	High	High	High	High	High	High	High	High
FALSE	High	Master Protein	Dlo_alt0050F-010-01.1_g00070.1	Dlo_alt0050F-010-01.1_g00070.1	0	27.397	16	4	15	4	299	32.8	8.06	345	4	0	0	1.228	0.956	1.214	0.779	0.989	1.27	1	1	1	1	1	1	90.9	111.6	87	110.4	1.57	3.33	6.2	3.24	High	High	High	High	High	High	High	High	High	High	High	High
FALSE	High	Master Protein	Dlo_pri0025F.1_g04040.1	Dlo_pri0025F.1_g04040.1	0	28.408	16	5	15	5	371	41.7	7.05	425	5	0	0	0.745	0.853	0.847	1.145	1.138	0.994	1	1	1	1	1	1	116.1	86.5	99	98.4	3.05	3.78	3.89	1.21	High	High	High	High	High	High	High	High	High	High	High	High
FALSE	High	Master Protein	Dlo_pri0006F.1_g01230.1	Dlo_pri0006F.1_g01230.1	0	41.236	5	9	15	9	1822	203.2	7.09	367	9	0	0	0.957	1.023	0.993	1.069	1.038	0.971	1	1	1	1	1	1	100.7	96.4	103	100	1.96	5.51	5.75	0.54	High	High	High	High	High	High	High	High	High	High	High	High
FALSE	High	Master Protein	Dlo_alt0447F-008-01.1_g00040.1	Dlo_alt0447F-008-01.1_g00040.1	0	47.52	14	6	15	4	692	75.6	6.95	606	6	0	0	0.833	1.254	0.951	1.504	1.141	0.758	1	1	1	1	1	1	99.1	82.6	124.2	94.2	4.98	10.75	5.5	2.23	High	High	High	High	High	High	High	High	High	High	High	High
FALSE	High	Master Protein	Dlo_pri0019F.1_g05330.1	Dlo_pri0019F.1_g05330.1	0	43.26	22	6	15	3	393	43.6	9.52	479	6	0	0	0.894	0.84	0.975	0.94	1.091	1.161							107.8	96.4	90.6	105.2					High	Not Found	Not Found	High	Not Found	Not Found	High	Not Found	Not Found	High	Not Found	Not Found
FALSE	High	Master Protein	Dlo_pri0579F.1_g00580.1	Dlo_pri0579F.1_g00580.1	0	49.163	31	5	15	5	267	30.9	5.16	483	5	0	0	1.021	1.144	0.929	1.12	0.91	0.812	1	1	1	1	1	1	97.7	99.8	111.8	90.8	1.55	2.77	0.74	1.96	High	High	High	High	High	High	High	High	High	High	High	High
FALSE	High	Master Protein	Dlo_pri0129F.1_g00340.1	Dlo_pri0129F.1_g00340.1	0	12.174	10	2	15	2	216	23.5	8.05	405	2	0	0	0.986	0.921	0.937	0.934	0.95	1.017	1	1	1	1	1	1	104.1	102.6	95.8	97.5	2.17	1.11	2.71	3.77	High	High	High	High	High	High	High	High	High	High	High	High
FALSE	High	Master Protein	Dlo_pri0076F.1_g00200.1	Dlo_pri0076F.1_g00200.1	0	30.903	22	5	15	5	285	32.1	7.12	341	5	0	0	1.064	0.941	0.987	0.884	0.928	1.049	1	1	1	1	1	1	100.2	106.6	94.3	98.9	1.39	2.2	1.79	0.7	High	High	High	High	High	High	High	High	High	High	High	High
FALSE	High	Master Protein	Dlo_pri1180F.1_g00180.1	Dlo_pri1180F.1_g00180.1	0	51.586	15	6	15	6	607	65.1	6.32	413	6	0	0	1.277	0.811	0.901	0.635	0.706	1.111	1	1	1	1	1	1	100.3	128.1	81.3	90.4	1.05	7.4	12.29	0.74	High	High	High	High	High	High	High	High	High	High	High	High
FALSE	High	Master Protein	Dlo_pri0595F.1_g00670.1	Dlo_pri0595F.1_g00670.1	0	26.511	15	3	15	3	306	34.8	8.68	474	3	0	0	1.241	0.974	1.107	0.784	0.892	1.137	1	1	1	1	1	1	92.5	114.9	90.1	102.5	5.17	9.92	4.71	3.98	High	High	High	High	High	High	High	High	High	High	High	High
FALSE	High	Master Protein	Dlo_pri0016F.1_g04130.1	Dlo_pri0016F.1_g04130.1	0	25.308	15	4	15	4	344	37.3	4.64	403	4	0	0	1.223	1.322	1.568	1.081	1.282	1.186	1	1	1	1	1	1	78.2	95.7	103.4	122.7	1.7	0.97	2.67	2.42	High	High	High	High	High	High	High	High	High	High	High	High
FALSE	High	Master Protein	Dlo_pri0021F.1_g08210.1	Dlo_pri0021F.1_g08210.1	0	17.078	15	3	15	2	207	23.2	8.95	341	3	0	0	1.282	0.753	1.077	0.587	0.84	1.43	1	1	1	1	1	1	97.3	124.8	73.2	104.7	4.11	10.49	8.34	3.01	High	High	High	High	High	High	High	High	High	High	High	High
FALSE	High	Master Protein	Dlo_pri0057F.1_g00330.1	Dlo_pri0057F.1_g00330.1	0	38.864	37	5	15	5	156	17.5	5.12	444	5	0	0	0.514	0.753	0.948	1.464	1.844	1.259	1	1	1	1	1	1	124.4	64	93.7	118	12.38	25.44	18.4	34.09	High	High	High	High	High	High	High	High	High	High	High	High
FALSE	High	Master Protein	Dlo_pri0143F.1_g01260.1	Dlo_pri0143F.1_g01260.1	0	33.587	16	7	15	7	573	64.6	7.06	381	7	0	0	1.068	1.213	0.877	1.136	0.821	0.723	1	1	1	1	1	1	96.2	102.8	116.7	84.3	1.05	1.19	2.02	2.66	High	High	High	High	High	High	High	High	High	High	High	High
FALSE	High	Master Protein	Dlo_pri0238F.1_g01230.1	Dlo_pri0238F.1_g01230.1	0	43.206	20	8	15	8	570	64	5.77	323	8	0	0	0.89	1.045	0.881	1.173	0.99	0.843	1	1	1	1	1	1	104.8	93.3	109.5	92.4	1	1.16	0.78	1.91	High	High	High	High	High	High	High	High	High	High	High	High
FALSE	High	Master Protein	Dlo_pri0069F.1_g04490.1	Dlo_pri0069F.1_g04490.1	0	44.383	16	9	15	9	765	82.4	6.83	455	9	0	0	1.8	1.352	1.274	0.751	0.708	0.942	1	1	1	1	1	1	73.7	132.7	99.7	93.9	2.54	1.14	4.16	4.14	High	High	High	High	High	High	High	High	High	High	High	High
FALSE	High	Master Protein	Dlo_pri0047F.1_g01380.1	Dlo_pri0047F.1_g01380.1	0	27.429	35	7	15	1	220	24.9	10.39	322	7	0	0	1.183	1.175	1.234	0.993	1.043	1.05							87.1	103.1	102.3	107.5					Not Found	High	Not Found	Not Found	High	Not Found	Not Found	High	Not Found	Not Found	High	Not Found
FALSE	High	Master Protein	Dlo_pri0178F.1_g02270.1	Dlo_pri0178F.1_g02270.1	0	41.017	25	5	15	4	243	27.5	5.82	381	5	0	1	2.564	2.496	3.931	0.973	1.533	1.575	1	1	1	1	1	1	40	102.7	99.9	157.4	10.75	1.85	6.9	4.69	High	High	Not Found	High	High	High	High	High	High	High	High	High
FALSE	High	Master Protein	Dlo_alt0015F-010-01.1_g00040.1	Dlo_alt0015F-010-01.1_g00040.1	0	46.319	18	6	14	6	618	68.1	8.43	473	6	0	0	0.897	0.868	0.889	0.968	0.992	1.024	1	1	1	1	1	1	109.5	98.2	95	97.3	1.53	1.95	2.72	1.85	High	High	High	High	High	High	High	High	High	High	High	High
FALSE	High	Master Protein	Dlo_pri0016F.1_g01900.1	Dlo_pri0016F.1_g01900.1	0	27.432	19	7	14	7	400	43.8	7.15	429	7	0	0	0.88	0.878	0.752	0.997	0.854	0.857	1	1	1	1	1	1	114	100.3	100	85.7	1.41	1.65	2.07	2.36	High	High	High	High	High	High	High	High	High	High	High	High
FALSE	High	Master Protein	Dlo_pri0128F.1_g02440.1	Dlo_pri0128F.1_g02440.1	0	37.209	19	9	14	9	539	62.5	8.22	326	9	0	0	0.772	0.944	0.94	1.223	1.218	0.996	1	1	1	1	1	1	109.4	84.4	103.3	102.9	2	12.32	6.84	1.28	High	High	High	High	High	High	High	High	High	High	High	High
FALSE	High	Master Protein	Dlo_pri0094F.1_g02930.1	Dlo_pri0094F.1_g02930.1	0	18.454	7	4	14	4	664	74.2	8	298	4	0	0	0.873	1.133	0.909	1.298	1.041	0.802	1	1	1	0.904859	1	1	102.2	89.2	115.8	92.8	0.74	1.36	2.06	1.76	High	High	High	High	High	High	High	High	High	High	High	High
FALSE	High	Master Protein	Dlo_pri0194F.1_g00560.1	Dlo_pri0194F.1_g00560.1	0	28.295	34	7	14	2	220	24.9	10.3	316	7	0	5	1.191	0.968	1.06	0.813	0.89	1.095	1	1	1	1	1	1	94.8	112.9	91.8	100.5	2.69	2.07	1.65	3.38	High	High	High	High	High	High	High	High	High	High	High	High
FALSE	High	Master Protein	Dlo_pri0001F.1_g08880.1	Dlo_pri0001F.1_g08880.1	0	39.941	26	5	14	5	302	32.7	6.3	343	5	0	0	1.042	0.99	0.933	0.951	0.896	0.942	1	1	1	1	1	1	100.9	105.1	99.9	94.1	4.74	5.35	0.23	0.64	High	High	High	High	High	High	High	High	High	High	High	High
FALSE	High	Master Protein	Dlo_pri0006F.1_g07500.1	Dlo_pri0006F.1_g07500.1	0	36.75	13	8	14	8	721	78.7	8.73	282	8	0	0	1.018	1.272	1.119	1.249	1.099	0.88	1	1	1	1	1	1	90.7	92.4	115.4	101.5	2.71	5.82	3.15	1.28	High	High	High	High	High	High	High	High	High	High	High	High
FALSE	High	Master Protein	Dlo_pri0039F.1_g04570.1	Dlo_pri0039F.1_g04570.1	0	39.629	17	5	14	5	589	63.2	6.07	467	5	0	0	0.817	0.873	0.758	1.069	0.928	0.868	1	1	1	1	1	1	116	94.8	101.3	87.9	2.76	2.58	0.08	2.1	High	High	High	High	High	High	High	High	High	High	High	High
FALSE	High	Master Protein	Dlo_pri0057F.1_g02760.1	Dlo_pri0057F.1_g02760.1	0	33.736	13	7	14	7	600	67.8	7.72	353	7	0	0	1.227	0.939	1.056	0.765	0.86	1.125	1	1	1	1	1	1	94.8	116.3	88.9	100	4.57	8.42	4.07	4.32	High	High	High	High	High	High	High	High	High	High	High	High
FALSE	High	Master Protein	Dlo_pri0030F.1_g01510.1	Dlo_pri0030F.1_g01510.1	0	18.978	23	5	14	5	234	26.1	8.22	368	5	0	0	1.183	0.955	1.124	0.807	0.951	1.177	1	1	1	1	1	1	93.8	111	89.6	105.5	0.97	0.88	1.23	0.76	High	High	High	High	High	High	High	High	High	High	High	High
FALSE	High	Master Protein	Dlo_pri0025F.1_g00220.1	Dlo_pri0025F.1_g00220.1	0	34.293	19	7	14	7	436	48.6	5.67	408	7	0	0	1.115	1.017	1.089	0.912	0.976	1.07	1	1	1	1	1	1	94.8	105.7	96.4	103.2	1.35	3.25	2.74	1.84	High	High	High	High	High	High	High	High	High	High	High	High
FALSE	High	Master Protein	Dlo_pri0382F.1_g00320.1	Dlo_pri0382F.1_g00320.1	0	31.262	17	6	14	6	378	41.2	7.34	357	6	0	0	0.347	0.851	0.507	2.451	1.461	0.596	0.0221222	1	0.168913	0.028835	1	0.29676	147.8	51.3	125.8	75	1.22	10.34	6.2	4.32	High	High	High	High	High	High	High	High	High	High	High	High
FALSE	High	Master Protein	Dlo_pri0046F.1_g02700.1	Dlo_pri0046F.1_g02700.1	0	24.486	12	4	14	4	434	46.3	5.24	426	4	0	0	0.771	0.951	0.615	1.233	0.798	0.647	1	1	1	1	1	1	119.8	92.4	114	73.7	1.72	0.82	2.4	6.5	High	High	High	High	High	High	High	High	High	High	High	High
FALSE	High	Master Protein	Dlo_pri0131F.1_g01100.1	Dlo_pri0131F.1_g01100.1	0	13.024	24	2	14	1	112	12.9	10.7	357	2	0	0	1.606	1.036	1.226	0.645	0.763	1.184	1	1	1	1	1	1	82.2	132	85.1	100.7	2.07	2.38	4.33	1.28	High	High	High	High	High	High	High	High	High	High	High	High
FALSE	High	Master Protein	Dlo_pri0001F.1_g10530.1	Dlo_pri0001F.1_g10530.1	0	25.198	24	3	14	3	100	11.3	5.85	436	3	0	0	1.113	0.838	0.748	0.753	0.672	0.893	1	1	1	1	1	1	108.1	120.3	90.6	80.9	1.06	1.71	1.04	3.75	High	High	High	High	High	High	High	High	High	High	High	High
FALSE	High	Master Protein	Dlo_pri0098F.1_g02540.1	Dlo_pri0098F.1_g02540.1	0	44.105	15	9	14	9	760	82.4	7.97	261	9	0	0	1.037	1.065	0.962	1.027	0.928	0.903	1	1	1	1	1	1	98.4	102	104.9	94.7	18.72	6.15	4.09	10.55	High	High	High	High	High	High	High	High	High	High	High	High
FALSE	High	Master Protein	Dlo_pri0174F.1_g00270.1	Dlo_pri0174F.1_g00270.1	0	32.111	43	4	14	2	122	13.5	6.92	423	4	0	0	0.853	0.982	0.848	1.151	0.994	0.864	0.286723	1	0.228918	1	1	0.744715	108.6	92.6	106.6	92.1	2.52	3.04	5.63	0.62	High	High	High	High	High	High	High	High	High	High	High	High
FALSE	High	Master Protein	Dlo_alt0198F-003-01.1_g00070.1	Dlo_alt0198F-003-01.1_g00070.1	0	29.146	13	4	14	4	361	39.8	9.95	396	4	0	0	1.54	0.988	1.285	0.642	0.835	1.3	1	1	1	1	1	1	83.1	128	82.1	106.8	1.95	1.36	1.77	1.7	High	High	High	High	High	High	High	High	High	High	High	High
FALSE	High	Master Protein	Dlo_alt0229F-006-01.1_g00030.1	Dlo_alt0229F-006-01.1_g00030.1	0	40.637	26	8	14	7	357	40.9	5.85	433	8	0	1	0.911	1.048	0.863	1.15	0.947	0.823	1	1	1	1	1	1	104.6	95.4	109.7	90.3	0.77	1.48	4.3	3.69	High	High	High	High	High	High	High	High	High	High	High	High
FALSE	High	Master Protein	Dlo_pri0073F.1_g01220.1	Dlo_pri0073F.1_g01220.1	0	22.6	26	3	14	3	183	19.6	6.76	267	3	0	0	1.177	1.035	0.909	0.879	0.773	0.879	1	1	1	1	1	1	97.1	114.2	100.4	88.3	3.36	3.99	4.95	4.47	High	High	High	High	High	High	High	High	High	High	High	High
FALSE	High	Master Protein	Dlo_pri0065F.1_g03710.1	Dlo_pri0065F.1_g03710.1	0	36.177	27	6	14	6	320	35	7.3	314	6	0	0	1.012	0.982	1.022	0.971	1.01	1.041	1	1	1	1	1	1	99.6	100.8	97.8	101.8	0.4	3.39	6.43	3.83	High	High	High	High	High	High	High	High	High	High	High	High
FALSE	High	Master Protein	Dlo_pri0038F.1_g04490.1	Dlo_pri0038F.1_g04490.1	0	20.068	26	5	14	1	206	23.5	10.49	324	5	0	0																					Not Found	Not Found	High	Not Found	Not Found	High	Not Found	Not Found	High	Not Found	Not Found	High
FALSE	High	Master Protein	Dlo_pri0026F.1_g01110.1	Dlo_pri0026F.1_g01110.1	0	19.19	22	3	14	2	153	17.8	10.98	378	3	0	0	1.127	0.919	0.87	0.815	0.771	0.947	1	1	1	1	1	1	102.2	115.2	93.8	88.8	10.34	21.62	8.88	7.03	High	High	High	High	High	High	High	High	High	High	High	High
FALSE	High	Master Protein	Dlo_pri0362F.1_g00760.1	Dlo_pri0362F.1_g00760.1	0	32.772	14	5	14	5	402	44.8	7.49	355	5	0	0	0.851	0.956	0.943	1.123	1.108	0.986	0.992364	1	1	1	1	1	106.7	90.8	102	100.6	4.22	1.31	1.42	2.17	High	High	High	High	High	High	High	High	High	High	High	High
FALSE	High	Master Protein	Dlo_alt0065F-016-01.1_g00070.1	Dlo_alt0065F-016-01.1_g00070.1	0	41.883	15	8	14	3	657	73.9	6.89	431	8	0	0	1.15	1.166	1.174	1.014	1.02	1.006	1	1	1	1	1	1	89.1	102.5	103.9	104.5	1.04	1.89	1.75	0.78	High	High	High	High	High	High	High	High	High	High	High	High
FALSE	High	Master Protein	Dlo_pri0029F.1_g02500.1	Dlo_pri0029F.1_g02500.1	0	20.352	20	5	14	1	333	36.5	7.03	230	5	0	0	1.178	1.05	1.018	0.891	0.864	0.97							94.2	111	98.9	95.9					Not Found	High	Not Found	Not Found	High	Not Found	Not Found	High	Not Found	Not Found	High	Not Found
FALSE	High	Master Protein	Dlo_alt0117F-010-01.1_g00020.1	Dlo_alt0117F-010-01.1_g00020.1	0	22.558	12	5	14	1	496	55.6	6.01	328	5	0	4	1.12	1.263	1.121	1.128	1.001	0.887	1	1	1	1	1	1	88.8	99.4	112.2	99.6	1.62	2.66	1.67	2.59	High	High	High	High	High	High	High	High	High	High	High	High
FALSE	High	Master Protein	Dlo_pri0057F.1_g02930.1	Dlo_pri0057F.1_g02930.1	0	40.786	13	5	14	5	594	66	8.92	342	5	0	0	1.068	1.127	1.101	1.056	1.031	0.977	1	1	1	1	1	1	93.1	99.4	104.9	102.5	2.15	4.92	8.33	5.33	High	High	High	High	High	High	High	High	High	High	High	High
FALSE	High	Master Protein	Dlo_pri0859F.1_g00360.1	Dlo_pri0859F.1_g00360.1	0	31.572	16	5	14	5	486	54.5	6.18	409	5	0	0	0.883	1.227	0.896	1.389	1.014	0.73	1	1	1	1	1	1	99.9	88.2	122.5	89.4	1.08	3.9	1.93	0.35	High	High	High	High	High	High	High	High	High	High	High	High
FALSE	High	Master Protein	Dlo_pri0128F.1_g00990.1	Dlo_pri0128F.1_g00990.1	0	24.112	28	4	14	4	165	18.7	6.06	296	4	0	0	0.659	0.918	0.667	1.394	1.012	0.726	1	1	1	1	1	1	123.3	81.2	113.2	82.2	2.04	2	1.05	2.3	High	High	High	High	High	High	High	High	High	High	High	High
FALSE	High	Master Protein	Dlo_pri0150F.1_g00590.1	Dlo_pri0150F.1_g00590.1	0	43.754	18	9	14	5	689	76.9	6.16	373	9	0	4	0.888	0.973	0.896	1.096	1.009	0.92	1	1	1	1	1	1	106.5	94.5	103.6	95.4	0.86	1.23	2.05	1.3	High	High	High	High	High	High	High	High	High	High	High	High
FALSE	High	Master Protein	Dlo_pri0001F.1_g00420.1	Dlo_pri0001F.1_g00420.1	0	26.656	32	4	14	4	184	20.6	8.15	418	4	0	0	1.096	1.099	1.033	1.003	0.943	0.94	1	1	1	1	1	1	94.6	103.7	104	97.7	1.36	4.57	1.81	2.74	High	High	High	High	High	High	High	High	High	High	High	High
FALSE	High	Master Protein	Dlo_pri0165F.1_g02350.1	Dlo_pri0165F.1_g02350.1	0	29.384	16	5	14	5	480	52.5	5.19	435	5	0	0	0.915	0.994	0.906	1.086	0.99	0.911	1	1	1	1	1	1	104.8	95.9	104.2	95	0.69	1.24	6.75	5.76	High	High	High	High	High	High	High	High	High	High	High	High
FALSE	High	Master Protein	Dlo_pri0088F.1_g02950.1	Dlo_pri0088F.1_g02950.1	0	25.39	14	5	14	1	416	46.6	7.47	379	5	0	0	0.612	0.867	0.663	1.415	1.082	0.765	0.637766	1	1	1	1	1	127.3	78	110.3	84.4	3.66	3.03	2.15	5.53	Not Found	High	High	Not Found	High	High	Not Found	High	High	Not Found	High	High
FALSE	High	Master Protein	Dlo_pri0002F.1_g06140.1	Dlo_pri0002F.1_g06140.1	0	29.765	28	6	14	1	218	24.2	4.89	353	6	0	0	0.838	0.993	0.806	1.186	0.962	0.811							110	92.1	109.3	88.6					Not Found	High	Not Found	Not Found	High	Not Found	Not Found	High	Not Found	Not Found	High	Not Found
FALSE	High	Master Protein	Dlo_pri0265F.1_g01080.1	Dlo_pri0265F.1_g01080.1	0	43.415	21	7	14	6	485	53.7	5.06	382	7	0	0	0.918	0.865	0.871	0.943	0.95	1.007	1	1	1	1	1	1	109.5	100.4	94.7	95.4	3.06	10.25	7.11	1.15	High	High	High	High	High	High	High	High	High	High	High	High
FALSE	High	Master Protein	Dlo_pri0213F.1_g00220.1	Dlo_pri0213F.1_g00220.1	0	41.044	21	4	14	3	306	35	4.94	444	4	0	1	0.937	0.981	0.946	1.048	1.009	0.964	1	1	1	1	1	1	103.5	97	101.6	97.9	2.37	1.04	0.85	2.15	High	High	High	High	High	High	High	High	High	High	High	High
FALSE	High	Master Protein	Dlo_pri0288F.1_g00400.1	Dlo_pri0288F.1_g00400.1	0	41.505	16	7	14	7	543	62.9	5.95	400	7	0	0	0.911	1.032	0.961	1.133	1.055	0.932	1	1	1	1	1	1	102.4	93.3	105.7	98.5	0.17	3.79	4.85	1.62	High	High	High	High	High	High	High	High	High	High	High	High
FALSE	High	Master Protein	Dlo_pri0265F.1_g01160.1	Dlo_pri0265F.1_g01160.1	0	21.341	17	4	14	2	264	28.6	6	361	4	0	0	0.854	0.872	0.88	1.021	1.03	1.01	1	1	1	1	1	1	110.9	94.7	96.7	97.6	3.36	9.12	6.33	3.21	High	High	High	High	High	High	High	High	High	High	High	High
FALSE	High	Master Protein	Dlo_pri0157F.1_g01030.1	Dlo_pri0157F.1_g01030.1	0	39.721	33	5	14	5	247	26.8	5.39	451	5	0	0	0.955	1.007	0.915	1.055	0.959	0.909	1	1	1	1	1	1	103.2	98.5	103.9	94.4	2.34	1.32	2.45	0.86	High	High	High	High	High	High	High	High	High	High	High	High
FALSE	High	Master Protein	Dlo_pri0451F.1_g00560.1	Dlo_pri0451F.1_g00560.1	0	24.013	26	3	14	1	165	18.4	9.07	474	3	0	0																					Not Found	High	High	Not Found	High	High	Not Found	High	Not Found	Not Found	High	High
FALSE	High	Master Protein	Dlo_pri0215F.1_g00440.1	Dlo_pri0215F.1_g00440.1	0	26.573	25	4	14	4	208	21.4	6.8	311	4	0	0	1.157	1.166	0.796	1.008	0.688	0.683	1	1	1	1	1	1	97.1	112.3	113.2	77.3	1.29	1.73	3.57	1.61	High	High	High	High	High	High	High	High	High	High	High	High
FALSE	High	Master Protein	Dlo_pri0267F.1_g00610.1	Dlo_pri0267F.1_g00610.1	0	14.603	18	5	14	4	233	26	10.26	251	5	0	1	1.126	0.978	0.992	0.868	0.881	1.015	1	1	1	1	1	1	97.7	110	95.5	96.9	0.93	2.22	3.3	0.11	High	High	High	High	High	High	High	High	High	High	High	High
FALSE	High	Master Protein	Dlo_pri0259F.1_g01370.1	Dlo_pri0259F.1_g01370.1	0	32.683	27	6	14	6	349	39.2	6.96	375	6	0	0	1.231	1.046	1.084	0.849	0.88	1.036	1	1	1	1	1	1	91.7	113	95.9	99.4	1.66	1.8	5.7	3.09	High	High	High	High	High	High	High	High	High	High	High	High
FALSE	High	Master Protein	Dlo_pri0088F.1_g02980.1	Dlo_pri0088F.1_g02980.1	0	25.183	12	5	14	1	451	50.2	5.76	380	5	0	4	0.537	0.718	0.597	1.336	1.111	0.832	0.217249	1	0.385272	1	1	1	140.2	75.4	100.7	83.7	1.26	3.58	3	2.11	High	High	Not Found	High	High	Not Found	High	High	Not Found	High	High	Not Found
FALSE	High	Master Protein	Dlo_alt0067F-017-01.1_g00030.1	Dlo_alt0067F-017-01.1_g00030.1	0	30.419	26	3	14	2	152	17.4	6.09	396	3	0	2	0.611	0.992	0.765	1.623	1.251	0.771	1	1	1	1	1	1	118.8	72.6	117.8	90.8	2.6	5.06	4.23	4.34	High	High	Not Found	High	High	Not Found	High	High	Not Found	High	High	Not Found
FALSE	High	Master Protein	Dlo_pri0005F.1_g00600.1	Dlo_pri0005F.1_g00600.1	0	45.094	12	4	13	4	462	50.3	8.57	385	4	0	0	1.22	0.878	0.974	0.72	0.798	1.109	1	1	1	1	1	1	98.2	119.9	86.3	95.6	3.14	6.27	9.01	3.03	High	High	High	High	High	High	High	High	High	High	High	High
FALSE	High	Master Protein	Dlo_pri0117F.1_g02140.1	Dlo_pri0117F.1_g02140.1	0	21.626	14	5	13	1	418	47.2	6.05	289	5	0	0	1.399	1.464	1.006	1.046	0.719	0.687	1	1	1	1	1	1	82.2	114.9	120.3	82.6	19.41	4.8	10.43	2.42	High	High	Not Found	High	High	Not Found	High	High	Not Found	High	High	Not Found
FALSE	High	Master Protein	Dlo_pri0015F.1_g03670.1	Dlo_pri0015F.1_g03670.1	0	24.818	15	2	13	2	161	17.3	7.33	467	2	0	0	1.183	1.062	0.943	0.898	0.797	0.887	1	1	1	1	1	1	95.5	113	101.5	90	3.37	2.9	2.47	2.8	High	High	High	High	High	High	High	High	High	High	High	High
FALSE	High	Master Protein	Dlo_pri0040F.1_g04020.1	Dlo_pri0040F.1_g04020.1	0	25.507	10	6	13	6	821	87.5	7.18	268	6	0	0	1.097	0.972	1.017	0.887	0.928	1.046	1	1	1	1	1	1	97.9	107.4	95.2	99.6	4.29	9.39	5.78	2.12	High	High	High	High	High	High	High	High	High	High	High	High
FALSE	High	Master Protein	Dlo_alt0531F-003-01.1_g00290.1	Dlo_alt0531F-003-01.1_g00290.1	0	21.615	10	3	13	3	303	34.2	9.28	368	3	0	0	0.606	0.987	0.565	1.628	0.933	0.573	1	1	1	1	1	1	126.6	76.8	125	71.6	6.04	2.89	2.77	11.43	High	High	High	High	High	High	High	High	High	High	High	High
FALSE	High	Master Protein	Dlo_pri0272F.1_g00420.1	Dlo_pri0272F.1_g00420.1	0	16.137	25	4	13	2	199	21.3	5.77	266	4	0	0	0.937	1.01	0.959	1.078	1.023	0.949	1	1	1	1	1	1	102.4	96	103.4	98.2	0.13	3.18	3.65	6.82	High	Not Found	High	High	Not Found	High	High	Not Found	High	High	Not Found	High
FALSE	High	Master Protein	Dlo_pri0202F.1_g00980.1	Dlo_pri0202F.1_g00980.1	0	30.602	14	4	13	1	346	38.5	5.19	406	4	0	0	0.744	0.965	0.755	1.297	1.015	0.783	1	1	1	1	1	1	115.5	85.9	111.4	87.2	2.01	10.11	13.27	6.32	High	High	High	High	High	High	High	High	High	High	High	High
FALSE	High	Master Protein	Dlo_pri0160F.1_g00580.1	Dlo_pri0160F.1_g00580.1	0	18.908	21	4	13	2	250	28.3	10.65	318	4	0	3	1.244	1.059	0.929	0.851	0.746	0.877	1	1	1	1	1	1	94.5	117.6	100.1	87.8	0.37	0.8	1.03	0.29	High	High	High	High	High	High	High	High	High	High	High	High
FALSE	High	Master Protein	Dlo_pri0095F.1_g02570.1	Dlo_pri0095F.1_g02570.1	0	33.313	26	6	13	6	301	34.6	6.73	424	6	0	0	0.854	0.989	0.85	1.159	0.995	0.859	1	1	1	1	1	1	108.3	92.5	107.2	92	1.22	2.85	2.14	2.53	High	High	High	High	High	High	High	High	High	High	High	High
FALSE	High	Master Protein	Dlo_pri0001F.1_g12570.1	Dlo_pri0001F.1_g12570.1	0	40.618	32	7	13	7	314	34.7	6.95	345	7	0	0	0.801	0.89	0.874	1.11	1.091	0.982	1	1	1	1	1	1	112.2	89.9	99.8	98	3.72	3.71	0.37	0.92	High	High	High	High	High	High	High	High	High	High	High	High
FALSE	High	Master Protein	Dlo_pri0144F.1_g02900.1	Dlo_pri0144F.1_g02900.1	0	26.741	10	5	13	4	622	68.5	6.74	377	5	0	0	1.628	1.422	1.838	0.874	1.129	1.293	1	1	1	1	1	1	67.9	110.6	96.6	124.9	3.99	7.53	4.41	9.14	High	High	High	High	High	High	High	High	High	High	High	High
FALSE	High	Master Protein	Dlo_pri0157F.1_g02270.1	Dlo_pri0157F.1_g02270.1	0	37.028	12	6	13	6	604	66.2	6.3	356	6	0	0	0.988	0.931	0.814	0.942	0.824	0.874	1	1	1	1	1	1	107.2	105.9	99.8	87.2	2.45	1.35	3.05	4.13	High	High	High	High	High	High	High	High	High	High	High	High
FALSE	High	Master Protein	Dlo_pri0255F.1_g02000.1	Dlo_pri0255F.1_g02000.1	0	27.961	28	5	13	5	250	28.5	5	288	5	0	0	0.861	0.926	0.909	1.075	1.055	0.981	1	1	1	1	1	1	108.2	93.2	100.2	98.3	1.56	5.04	5.47	1.01	High	High	High	High	High	High	High	High	High	High	High	High
FALSE	High	Master Protein	Dlo_pri0039F.1_g02020.1	Dlo_pri0039F.1_g02020.1	0	13.031	19	3	13	2	133	15.6	10.61	326	3	0	1	1.222	1	1.028	0.818	0.841	1.028	1	1	1	1	1	1	94.1	115	94.1	96.8	2.44	1.81	2.82	4.57	High	High	High	High	High	High	High	High	High	High	High	High
FALSE	High	Master Protein	Dlo_pri0050F.1_g03490.1	Dlo_pri0050F.1_g03490.1	0	23.015	16	5	13	1	371	39.9	6.19	244	5	0	0	1.302	1.003	0.943	0.77	0.724	0.94	1	1	1	1	1	1	94.1	122.6	94.5	88.8	3.41	0.87	4.58	2.46	Not Found	High	High	Not Found	High	High	Not Found	High	High	Not Found	High	High
FALSE	High	Master Protein	Dlo_pri0109F.1_g03060.1	Dlo_pri0109F.1_g03060.1	0	19.696	26	3	13	1	148	16.7	10.39	333	3	0	0	0.807	0.818	0.935	1.013	1.157	1.142	1	1	1	1	1	1	112.4	90.7	91.9	105	1.33	2.64	3.16	2	High	High	High	High	High	High	High	High	High	High	High	High
FALSE	High	Master Protein	Dlo_pri0181F.1_g01280.1	Dlo_pri0181F.1_g01280.1	0	26.526	35	5	13	5	197	21	5.76	301	5	0	0	0.871	0.992	0.881	1.139	1.012	0.888	1	1	1	1	1	1	106.8	93	106	94.1	1.23	7.69	5.11	1.69	High	High	High	High	High	High	High	High	High	High	High	High
FALSE	High	Master Protein	Dlo_pri0009F.1_g02500.1	Dlo_pri0009F.1_g02500.1	0	16.303	11	3	13	2	273	29.8	8.32	282	3	0	1	0.98	1.101	0.914	1.123	0.932	0.83	1	1	1	1	1	0.267826	100.1	98.1	110.2	91.5	1.26	3.27	3.54	2.05	High	High	High	High	High	High	High	High	High	High	High	High
FALSE	High	Master Protein	Dlo_pri0402F.1_g00700.1	Dlo_pri0402F.1_g00700.1	0	33.841	15	6	13	6	462	51.7	6.27	326	6	0	0	0.89	0.997	0.863	1.12	0.969	0.865	1	1	1	1	1	1	106.7	95	106.3	92	0.58	2.04	3.94	3.99	High	High	High	High	High	High	High	High	High	High	High	High
FALSE	High	Master Protein	Dlo_alt0439F-003-01.1_g00150.1	Dlo_alt0439F-003-01.1_g00150.1	0	30.53	30	5	13	5	210	25.5	4.83	406	5	0	0	0.737	0.959	0.692	1.3	0.939	0.722	1	1	1	1	1	1	118	87	113.2	81.7	2.57	2.55	3.22	2.68	High	High	High	High	High	High	High	High	High	High	High	High
FALSE	High	Master Protein	Dlo_pri0202F.1_g00930.1	Dlo_pri0202F.1_g00930.1	0	24.061	18	6	13	6	303	32.9	6.23	214	6	0	0	1.083	1.09	0.902	1.006	0.832	0.827	1	1	1	1	1	1	98.1	106.3	107	88.5	3.66	3.11	2.59	3.38	High	High	High	High	High	High	High	High	High	High	High	High
FALSE	High	Master Protein	Dlo_pri0006F.1_g07040.1	Dlo_pri0006F.1_g07040.1	0	23.899	3	2	13	1	810	92.5	6.48	450	2	0	0	1.157	1.144	1.419	0.989	1.226	1.24							84.8	98.1	97	120.2					Not Found	Not Found	High	Not Found	Not Found	High	Not Found	Not Found	High	Not Found	Not Found	High
FALSE	High	Master Protein	Dlo_pri0050F.1_g02740.1	Dlo_pri0050F.1_g02740.1	0	39.374	10	6	13	6	647	73	6.92	314	6	0	0	1.172	0.942	1.224	0.804	1.045	1.3	1	1	1	1	1	1	92.2	108.1	86.8	112.9	7.05	4.56	3.18	3.81	High	High	High	High	High	High	High	High	High	High	High	High
FALSE	High	Master Protein	Dlo_pri0016F.1_g01500.1	Dlo_pri0016F.1_g01500.1	0	26.731	22	5	13	5	323	34.8	5.14	365	5	0	0	0.867	0.844	1.013	0.973	1.168	1.201	1	1	1	1	1	1	107.4	93.2	90.6	108.8	0.32	4.29	3.22	1.39	High	High	High	High	High	High	High	High	High	High	High	High
FALSE	High	Master Protein	Dlo_pri0113F.1_g00340.1	Dlo_pri0113F.1_g00340.1	0	32.293	24	4	13	4	202	22.4	6.67	371	4	0	0	0.891	0.969	0.814	1.088	0.913	0.839	1	1	0.386519	1	1	1	108.9	97	105.5	88.6	2.75	6.36	6.54	3.61	High	High	High	High	High	High	High	High	High	High	High	High
FALSE	High	Master Protein	Dlo_pri0028F.1_g03090.1	Dlo_pri0028F.1_g03090.1	0	33.839	25	7	13	7	355	39.9	5.02	300	7	0	0	0.663	0.765	0.747	1.153	1.126	0.976	1	1	1	1	1	1	126	83.6	96.4	94.1	4.65	6.2	2.12	0.93	High	High	High	High	High	High	High	High	High	High	High	High
FALSE	High	Master Protein	Dlo_pri0017F.1_g05200.1	Dlo_pri0017F.1_g05200.1	0	30.046	12	6	13	6	605	68.2	7.69	322	6	0	0	1.031	0.99	0.94	0.96	0.911	0.95	1	1	1	1	1	1	101	104.1	100	94.9	0.93	2.76	3.6	1.82	High	High	High	High	High	High	High	High	High	High	High	High
FALSE	High	Master Protein	Dlo_pri0023F.1_g01620.1	Dlo_pri0023F.1_g01620.1	0	32.484	23	7	13	6	385	41.1	7.88	355	7	0	0	0.948	1.029	0.864	1.086	0.912	0.84	1	1	1	1	1	1	104.1	98.7	107.2	90	1.96	7.91	9.02	1.56	High	High	High	High	High	High	High	High	High	High	High	High
FALSE	High	Master Protein	Dlo_alt0497F-006-01.1_g00030.1	Dlo_alt0497F-006-01.1_g00030.1	0	23.128	21	5	13	5	278	31.1	5.3	342	5	0	0	1.175	0.887	1.113	0.755	0.948	1.255	1	1	1	1	1	1	95.8	112.5	85	106.7	2.99	5.22	4.64	4.48	High	High	High	High	High	High	High	High	High	High	High	High
FALSE	High	Master Protein	Dlo_pri0081F.1_g01270.1	Dlo_pri0081F.1_g01270.1	0	28.793	25	5	13	2	219	24.2	7.44	384	5	0	0	0.868	1.103	0.9	1.271	1.037	0.816	1	1	1	1	1	1	103.3	89.7	114	93	1.95	2.36	2.64	3.28	High	High	High	High	High	High	High	High	High	High	High	High
FALSE	High	Master Protein	Dlo_pri0042F.1_g01220.1	Dlo_pri0042F.1_g01220.1	0	31.853	17	7	13	7	622	70.4	6.51	310	7	0	0	1.02	1.136	1.013	1.113	0.992	0.891	1	1	1	1	1	1	95.9	97.9	109	97.2	1.95	0.39	2.41	2.51	High	High	High	High	High	High	High	High	High	High	High	High
FALSE	High	Master Protein	Dlo_alt0132F-012-01.1_g00110.1	Dlo_alt0132F-012-01.1_g00110.1	0	31.044	14	4	13	2	328	37.9	9.04	400	4	0	0	0.781	1.066	0.894	1.365	1.145	0.839	1	1	1	1	1	1	106.9	83.5	114	95.6	2.75	11.17	8.23	3.65	High	High	High	High	High	High	High	High	High	High	High	High
FALSE	High	Master Protein	Dlo_pri0000F.1_g08490.1	Dlo_pri0000F.1_g08490.1	0	26.319	19	6	13	5	375	42.7	5.6	278	6	0	0	0.907	1.006	0.915	1.11	1.009	0.909	1	1	1	1	1	1	104.5	94.7	105.1	95.6	1.63	10.77	6.51	5.18	High	High	High	High	High	High	High	High	High	High	High	High
FALSE	High	Master Protein	Dlo_alt0203F-004-01.1_g00070.1	Dlo_alt0203F-004-01.1_g00070.1	0	26.616	17	4	13	4	237	26.4	4.7	392	4	0	0	1.268	1.173	0.763	0.925	0.601	0.65	1	1	1	1	1	1	95.1	120.6	111.6	72.6	0.57	7.2	2	9.08	High	High	High	High	High	High	High	High	High	High	High	High
FALSE	High	Master Protein	Dlo_alt0255F-004-01.1_g00020.1	Dlo_alt0255F-004-01.1_g00020.1	0	18.304	10	3	13	3	341	38.8	7.75	130	3	0	0	0.937	0.925	0.812	0.988	0.867	0.878	1	1	1	1	1	1	108.9	102	100.7	88.4	1.93	0.22	3.52	2.28	High	High	High	High	High	High	High	High	High	High	High	High
FALSE	High	Master Protein	Dlo_pri0396F.1_g00230.1	Dlo_pri0396F.1_g00230.1	0	20.414	13	3	13	3	352	38.1	8.12	335	3	0	0	1.151	1.029	0.981	0.894	0.852	0.953	1	1	1	1	1	1	96.1	110.7	98.9	94.3	0.61	2.13	4.16	2.64	High	High	High	High	High	High	High	High	High	High	High	High
FALSE	High	Master Protein	Dlo_pri0074F.1_g03870.1	Dlo_pri0074F.1_g03870.1	0	28.735	26	4	13	4	232	26	9.52	423	4	0	0	0.941	0.946	0.949	1.006	1.008	1.002	1	1	1	1	1	1	104.3	98.1	98.7	98.9	5.95	9.68	9.91	9.41	High	High	High	High	High	High	High	High	High	High	High	High
FALSE	High	Master Protein	Dlo_pri0065F.1_g04100.1	Dlo_pri0065F.1_g04100.1	0	16.048	16	3	13	2	271	30.4	8.59	277	3	0	1	1.432	0.958	1.442	0.669	1.007	1.505	0.680485	1	0.791045	0.440663	1	0.448611	82.8	118.6	79.3	119.4	1.13	2.04	1.07	2.01	High	High	High	High	High	High	High	High	High	High	High	High
FALSE	High	Master Protein	Dlo_pri0383F.1_g00730.1	Dlo_pri0383F.1_g00730.1	0	41.136	11	9	13	9	1074	122.4	7.14	383	9	0	0	1.086	0.92	1.152	0.847	1.06	1.252	1	1	1	1	1	1	96.2	104.5	88.5	110.8	3.92	3.8	4.13	1.63	High	High	High	High	High	High	High	High	High	High	High	High
FALSE	High	Master Protein	Dlo_pri0097F.1_g03050.1	Dlo_pri0097F.1_g03050.1	0	31.921	16	5	13	4	376	41.2	5.05	338	5	0	0	1.2	1.065	1.032	0.888	0.86	0.969	1	1	1	1	1	1	93.1	111.7	99.2	96	3.9	1.61	0.91	2.82	High	High	High	High	High	High	High	High	High	High	High	High
FALSE	High	Master Protein	Dlo_pri0462F.1_g00210.1	Dlo_pri0462F.1_g00210.1	0	13.918	7	3	13	2	510	57	8.59	177	3	0	0	0.856	0.933	0.822	1.091	0.961	0.881	1	1	1	1	1	1	110.8	94.8	103.4	91.1	1.98	4.65	2.59	3.19	High	High	High	High	High	High	High	High	High	High	High	High
FALSE	High	Master Protein	Dlo_alt0318F-003-01.1_g00030.1	Dlo_alt0318F-003-01.1_g00030.1	0	19.731	39	4	13	2	142	16.4	7.14	354	4	0	2	0.921	0.822	0.788	0.893	0.857	0.959	1	1	1	1	1	1	113.3	104.3	93.2	89.3	1.42	3.85	5.28	2.77	High	High	High	High	High	High	High	High	High	High	High	High
FALSE	High	Master Protein	Dlo_alt0004F-012-01.1_g00020.1	Dlo_alt0004F-012-01.1_g00020.1	0	37.072	11	5	13	5	514	55.7	6.28	367	5	0	0	1.316	1.164	1.266	0.884	0.962	1.088	1	1	1	1	1	1	84.3	110.9	98.1	106.7	6.05	1.61	4.98	1.52	High	High	High	High	High	High	High	High	High	High	High	High
FALSE	High	Master Protein	Dlo_pri0177F.1_g00830.1	Dlo_pri0177F.1_g00830.1	0	30.501	12	5	13	5	606	65.4	5.86	349	5	0	0	0.783	0.7	0.665	0.893	0.849	0.951	1	1	1	1	1	1	127	99.5	88.9	84.5	4.3	2.77	2.51	1.45	High	High	High	High	High	High	High	High	High	High	High	High
FALSE	High	Master Protein	Dlo_alt1038F-001-01.1_g00020.1	Dlo_alt1038F-001-01.1_g00020.1	0	6.055	10	2	13	2	150	16.9	9.79	261	2	0	0	1.255	0.878	0.763	0.699	0.608	0.869	1	1	1	1	0.700885	1	102.7	128.9	90.1	78.3	1.73	1.27	2.71	2.23	High	High	High	High	High	High	High	High	High	High	High	High
FALSE	High	Master Protein	Dlo_pri0006F.1_g01340.1	Dlo_pri0006F.1_g01340.1	0	30.301	18	3	13	3	308	35	9.54	336	3	0	0	0.81	0.798	0.756	0.986	0.934	0.947	1	1	1	1	1	1	118.9	96.3	94.9	89.9	2.18	3.17	4.76	2.69	High	High	High	High	High	High	High	High	High	High	High	High
FALSE	High	Master Protein	Dlo_pri0341F.1_g01080.1	Dlo_pri0341F.1_g01080.1	0	27.084	14	5	13	5	492	53.5	5.9	329	5	0	0	1.042	0.894	1.259	0.858	1.208	1.408	1	1	1	1	1	1	95.4	99.3	85.3	120	3.27	4.24	2.09	2.44	High	High	High	High	High	High	High	High	High	High	High	High
FALSE	High	Master Protein	Dlo_pri0194F.1_g00570.1	Dlo_pri0194F.1_g00570.1	0	25.11	34	7	13	2	220	25	10.36	258	7	0	1	1.057	0.92	0.928	0.871	0.878	1.009	1	1	1	1	1	1	102.4	108.2	94.2	95.1	1.06	1.68	1.15	1.51	Not Found	High	Not Found	Not Found	High	Not Found	Not Found	High	Not Found	Not Found	High	Not Found
FALSE	High	Master Protein	Dlo_pri0264F.1_g01370.1	Dlo_pri0264F.1_g01370.1	0	14.07	15	4	13	3	249	27.9	8.47	259	4	0	1	1.252	1.015	1.059	0.811	0.846	1.043	1	1	1	1	1	1	92.5	115.8	93.9	97.9	3.36	3.24	2.42	3.26	High	High	High	High	High	High	High	High	High	High	High	High
FALSE	High	Master Protein	Dlo_pri0028F.1_g04390.1	Dlo_pri0028F.1_g04390.1	0	25.787	17	5	13	5	302	34.6	5.52	394	5	0	0	0.704	0.98	0.724	1.391	1.029	0.739	1	1	1	1	1	1	117.3	82.6	115	85	4.28	3.31	0.39	2.51	High	High	High	High	High	High	High	High	High	High	High	High
FALSE	High	Master Protein	Dlo_pri0159F.1_g00160.1	Dlo_pri0159F.1_g00160.1	0	26.018	18	5	13	4	328	36.5	9.1	280	5	0	1	0.832	0.891	0.81	1.07	0.972	0.909	1	1	1	1	1	1	113.2	94.3	100.9	91.7	2.61	3.43	2.9	4.92	High	High	High	High	High	High	High	High	High	High	High	High
FALSE	High	Master Protein	Dlo_pri0142F.1_g01380.1	Dlo_pri0142F.1_g01380.1	0	28.138	18	5	13	5	406	43.6	8.65	445	5	0	0	1.374	0.887	1.219	0.646	0.887	1.374	1	1	1	0.915928	1	1	89.3	122.7	79.2	108.8	1.67	0.86	1.48	1.95	High	High	High	High	High	High	High	High	High	High	High	High
FALSE	High	Master Protein	Dlo_pri0113F.1_g02600.1	Dlo_pri0113F.1_g02600.1	0	39.561	18	7	13	7	552	61.6	6.81	373	7	0	0	1.116	0.982	1.196	0.879	1.072	1.219	1	1	1	1	1	1	93.1	104	91.4	111.4	8.02	2.98	18.22	16.58	High	High	High	High	High	High	High	High	High	High	High	High
FALSE	High	Master Protein	Dlo_pri0957F-1.1_g00020.1	Dlo_pri0957F-1.1_g00020.1	0	24.63	10	5	13	5	507	55.4	5.64	367	5	0	0	0.803	0.981	0.939	1.222	1.17	0.957	1	1	1	1	1	1	107.4	86.3	105.4	100.9	1.48	1.37	1.17	0.35	High	High	High	High	High	High	High	High	High	High	High	High
FALSE	High	Master Protein	Dlo_pri0033F.1_g00390.1	Dlo_pri0033F.1_g00390.1	0	33.654	20	7	13	7	492	56.8	7.17	381	7	0	0	1.051	1.238	1.018	1.179	0.969	0.822	1	1	1	1	1	1	92.9	97.6	115	94.5	3.1	1.95	4.23	3.56	High	High	High	High	High	High	High	High	High	High	High	High
FALSE	High	Master Protein	Dlo_pri0320F.1_g00260.1	Dlo_pri0320F.1_g00260.1	0	25.97	9	4	13	3	569	63	7.58	387	4	0	0	1.234	1.298	0.811	1.052	0.657	0.625	1	1	1	1	1	1	92.1	113.7	119.5	74.7	1.95	1.89	0.82	4.06	High	High	High	High	High	High	High	High	High	High	High	High
FALSE	High	Master Protein	Dlo_pri0305F.1_g00510.1	Dlo_pri0305F.1_g00510.1	0	40.215	14	8	13	8	768	84.4	5.64	357	8	0	0	0.815	0.962	0.833	1.18	1.022	0.866	1	1	1	1	1	1	110.8	90.3	106.6	92.3	2.03	4.14	3.07	2.41	High	High	High	High	High	High	High	High	High	High	High	High
FALSE	High	Master Protein	Dlo_pri0053F.1_g01750.1	Dlo_pri0053F.1_g01750.1	0	12.527	24	2	13	2	151	17	10.37	363	2	0	0	1.133	0.847	0.883	0.747	0.779	1.043	1	1	1	1	1	1	103.5	117.3	87.7	91.4	1.5	3.2	4.53	1.91	High	High	High	High	High	High	High	High	High	High	High	High
FALSE	High	Master Protein	Dlo_pri0684F.1_g00520.1	Dlo_pri0684F.1_g00520.1	0	23.829	11	5	13	5	611	68.5	8.63	313	5	0	0	1.026	0.952	0.998	0.927	0.973	1.049	1	1	1	1	1	1	100.6	103.2	95.7	100.4	1.97	4.09	1.41	4.41	High	High	High	High	High	High	High	High	High	High	High	High
FALSE	High	Master Protein	Dlo_pri0103F.1_g01090.1	Dlo_pri0103F.1_g01090.1	0	35.838	53	6	13	3	172	19.5	6.93	371	6	0	3	0.991	1.486	1.173	1.5	1.183	0.789	1	1	1	1	1	1	86	85.3	127.8	100.9	2.01	5.74	3.75	1.2	High	High	High	High	High	High	High	High	High	High	High	High
FALSE	High	Master Protein	Dlo_pri0040F.1_g03460.1	Dlo_pri0040F.1_g03460.1	0	27.203	14	4	13	2	372	40.8	5.99	276	4	0	2	1.261	1.101	1.063	0.874	0.843	0.965	1	1	1	1	1	1	90.4	114	99.6	96.1	4.79	5.53	5.8	4	High	High	High	High	High	High	High	High	High	High	High	High
FALSE	High	Master Protein	Dlo_pri0001F.1_g05520.1	Dlo_pri0001F.1_g05520.1	0	25.984	18	5	13	5	410	46.4	5.22	404	5	0	0	0.922	0.947	0.934	1.027	1.013	0.986	1	1	1	1	1	1	105.2	97	99.6	98.3	1.37	2.22	1.97	1.65	High	High	High	High	High	High	High	High	High	High	High	High
FALSE	High	Master Protein	Dlo_pri0497F.1_g00180.1	Dlo_pri0497F.1_g00180.1	0	35.615	49	5	12	3	128	14	4.28	431	5	0	2	0.757	0.859	0.747	1.135	0.987	0.87	1	1	1	1	1	1	119	90	102.1	88.9	0.99	2.51	2.08	0.77	High	High	High	High	High	High	High	High	High	High	High	High
FALSE	High	Master Protein	Dlo_pri0134F.1_g00700.1	Dlo_pri0134F.1_g00700.1	0	33.093	24	6	12	6	176	19.5	10.43	289	6	0	0	1.057	0.905	0.876	0.856	0.829	0.968	1	1	1	1	1	1	104.2	110.2	94.3	91.3	0.64	1.28	0.91	1.38	High	High	High	High	High	High	High	High	High	High	High	High
FALSE	High	Master Protein	Dlo_alt0472F-001-01.1_g00040.1	Dlo_alt0472F-001-01.1_g00040.1	0	34.286	15	7	12	7	552	60.1	6.48	254	7	0	0	0.896	0.945	1.063	1.054	1.186	1.125	1	1	1	1	1	1	102.5	91.8	96.8	108.9	4.97	6.6	2.46	1.54	High	High	High	High	High	High	High	High	High	High	High	High
FALSE	High	Master Protein	Dlo_pri0098F.1_g01170.1	Dlo_pri0098F.1_g01170.1	0	27.491	13	6	12	6	538	61.3	8.78	284	6	0	0	0.726	1.355	0.693	1.866	0.954	0.511	1	1	1	1	1	1	106	77	143.6	73.4	3.41	6.54	5.34	8.7	High	High	High	High	High	High	High	High	High	High	High	High
FALSE	High	Master Protein	Dlo_alt0221F-001-01-1.1_g00010.1	Dlo_alt0221F-001-01-1.1_g00010.1	0	27.871	20	7	12	7	437	48.3	6.87	290	7	0	0	1.329	0.983	1.09	0.74	0.821	1.109	1	1	1	1	1	1	90.9	120.7	89.3	99.1	1.26	4.9	8.05	2.68	High	High	High	High	High	High	High	High	High	High	High	High
FALSE	High	Master Protein	Dlo_pri0544F.1_g00120.1	Dlo_pri0544F.1_g00120.1	0	35.92	9	7	12	5	997	113.1	9.14	278	7	0	2	1.115	1.032	1.31	0.926	1.174	1.268	1	1	1	1	1	1	89.7	100.1	92.7	117.5	2.69	0.94	0.12	1.35	High	High	Not Found	High	High	Not Found	High	High	Not Found	High	High	Not Found
FALSE	High	Master Protein	Dlo_pri0113F.1_g02150.1	Dlo_pri0113F.1_g02150.1	0	8.011	7	3	12	3	307	34.4	8.31	133	3	0	0	0.915	0.909	0.814	0.993	0.889	0.895	1	1	1	1	1	1	109.9	100.6	100	89.5	1.91	1.87	1.54	2.34	High	High	High	High	High	High	High	High	High	High	High	High
FALSE	High	Master Protein	Dlo_pri0072F.1_g00590.1	Dlo_pri0072F.1_g00590.1	0	24.753	37	5	12	2	203	22.5	5.71	251	5	0	0	1.053	1.093	0.976	1.038	0.927	0.893							97	102.2	106	94.7					High	High	Not Found	High	High	Not Found	High	High	Not Found	High	High	Not Found
FALSE	High	Master Protein	Dlo_pri0098F.1_g00670.1	Dlo_pri0098F.1_g00670.1	0	19.115	35	4	12	4	141	16	10.04	291	4	0	0	0.742	1.002	0.966	1.35	1.302	0.965	0.387007	1	1	0.383037	0.816541	1	107.8	80	108	104.2	1.53	1.59	2.94	2.63	High	High	High	High	High	High	High	High	High	High	High	High
FALSE	High	Master Protein	Dlo_pri0010F.1_g02230.1	Dlo_pri0010F.1_g02230.1	0	23.056	26	4	12	4	169	18.5	5.57	325	4	0	0	1.088	1.008	1.497	0.926	1.375	1.485	1	1	1	1	1	1	87.1	94.8	87.8	130.3	4.67	1.65	3.84	2.51	High	High	High	High	High	High	High	High	High	High	High	High
FALSE	High	Master Protein	Dlo_alt1201F-001-01.1_g00010.1	Dlo_alt1201F-001-01.1_g00010.1	0	21.605	7	3	12	1	582	66.4	8.78	296	3	0	0	0.882	0.888	0.922	1.006	1.045	1.039	1	1	1	1	1	1	108.4	95.6	96.2	99.9	4.13	1.82	5.84	2.96	High	High	High	High	High	High	High	High	High	High	High	High
FALSE	High	Master Protein	Dlo_pri0004F.1_g08530.1	Dlo_pri0004F.1_g08530.1	0	27.487	14	6	12	3	532	57.9	5.15	272	6	0	0	1.14	0.923	0.785	0.809	0.688	0.851	1	1	1	1	1	1	104	118.5	95.9	81.6	3.25	2.48	1.56	1.09	High	High	High	High	High	High	High	High	High	High	High	High
FALSE	High	Master Protein	Dlo_pri0970F.1_g00050.1	Dlo_pri0970F.1_g00050.1	0	25.566	6	5	12	5	1179	132.2	8.57	306	5	0	0	0.864	1.139	0.891	1.319	1.032	0.783	1	1	1	1	1	1	102.7	88.7	117	91.6	3.82	16.71	10.54	3.31	High	High	High	High	High	High	High	High	High	High	High	High
FALSE	High	Master Protein	Dlo_pri0098F.1_g01050.1	Dlo_pri0098F.1_g01050.1	0	32.02	12	5	12	5	499	57.4	5.81	370	5	0	0	0.815	0.795	0.723	0.975	0.887	0.91	1	1	1	1	1	1	120	97.9	95.4	86.8	5.43	6.22	11.02	12.7	High	High	High	High	High	High	High	High	High	High	High	High
FALSE	High	Master Protein	Dlo_pri1420F-1.1_g00010.1	Dlo_pri1420F-1.1_g00010.1	0	20.899	12	5	12	2	507	55.4	5.26	249	5	0	3	1.185	0.947	0.903	0.8	0.762	0.953	1	1	1	0.671908	0.738874	1	99.1	117.4	93.9	89.5	3.2	5.08	2.78	2.44	High	High	High	High	High	High	High	High	High	High	High	High
FALSE	High	Master Protein	Dlo_pri0032F.1_g03210.1	Dlo_pri0032F.1_g03210.1	0	21.732	16	5	12	5	333	36.7	5.77	402	5	0	0	0.818	0.883	0.744	1.079	0.909	0.843	1	1	1	1	1	1	116.1	95	102.5	86.4	3.1	0.32	0.62	3.47	High	High	High	High	High	High	High	High	High	High	High	High
FALSE	High	Master Protein	Dlo_pri0179F.1_g02000.1	Dlo_pri0179F.1_g02000.1	0	37.948	25	4	12	4	246	27.4	6.9	379	4	0	0	1.232	0.977	1.101	0.793	0.893	1.127	1	1	1	1	1	1	92.8	114.4	90.7	102.2	4.29	6.29	2.42	1.42	High	High	High	High	High	High	High	High	High	High	High	High
FALSE	High	Master Protein	Dlo_pri0230F.1_g01350.1	Dlo_pri0230F.1_g01350.1	0	20.485	4	5	12	3	1089	117.9	9.41	287	5	0	0	0.893	0.922	1.135	1.033	1.271	1.23	1	1	1	1	1	1	101.3	90.4	93.4	114.9	6.58	12.84	9.98	5.34	High	High	High	High	High	High	High	High	High	High	High	High
FALSE	High	Master Protein	Dlo_pri0015F.1_g04550.1	Dlo_pri0015F.1_g04550.1	0	27.986	33	5	12	5	186	21.3	11.65	297	5	0	0	1.095	1.072	0.861	0.978	0.786	0.804	1	1	1	1	1	1	99.3	108.8	106.4	85.5	0.76	10.63	8.32	5.02	High	High	High	High	High	High	High	High	High	High	High	High
FALSE	High	Master Protein	Dlo_pri1583F.1_g00100.1	Dlo_pri1583F.1_g00100.1	0	21.266	14	4	12	4	313	32.6	8.24	248	4	0	0	0.883	0.934	0.913	1.057	1.033	0.977	1	1	1	1	1	1	107.2	94.7	100.2	97.9	2.16	1.15	0.7	0.88	High	High	High	High	High	High	High	High	High	High	High	High
FALSE	High	Master Protein	Dlo_pri0383F.1_g00920.1	Dlo_pri0383F.1_g00920.1	0	31.779	18	6	12	1	485	52.2	5.59	327	6	0	0	0.984	0.92	0.925	0.935	0.94	1.006	1	1	1	1	1	1	104.5	102.8	96.1	96.6	2.28	5.63	6.09	0.45	High	High	High	High	High	High	High	High	High	High	High	High
FALSE	High	Master Protein	Dlo_pri0194F.1_g01050.1	Dlo_pri0194F.1_g01050.1	0	39.984	48	5	12	3	160	17.7	6.7	420	5	0	0	1.131	1.035	0.981	0.915	0.867	0.948	1	1	1	1	1	1	96.4	109.1	99.8	94.6	2.11	2.92	5.16	3.81	High	High	High	High	High	High	High	High	High	High	High	High
FALSE	High	Master Protein	Dlo_pri0015F.1_g00240.1	Dlo_pri0015F.1_g00240.1	0	23.353	14	6	12	5	464	50.7	7.5	236	6	0	0	1.236	1.005	0.927	0.813	0.75	0.922	1	1	1	1	1	1	96	118.6	96.5	88.9	3.04	1.83	5.89	1.28	High	High	High	High	High	High	High	High	High	High	High	High
FALSE	High	Master Protein	Dlo_pri0000F.1_g09780.1	Dlo_pri0000F.1_g09780.1	0	31.842	24	6	12	6	345	38.3	5.17	311	6	0	0	0.935	1.054	0.742	1.128	0.794	0.704	1	1	1	1	1	1	107.2	100.2	113	79.5	1.45	5.92	5.59	4.16	High	High	High	High	High	High	High	High	High	High	High	High
FALSE	High	Master Protein	Dlo_pri0337F.1_g00670.1	Dlo_pri0337F.1_g00670.1	0	27.028	28	5	12	5	218	25.5	9.17	375	5	0	0	1.042	1.246	0.956	1.196	0.917	0.767	1	1	1	1	1	1	94.3	98.2	117.4	90.1	0.42	1.74	2.71	2.01	High	High	High	High	High	High	High	High	High	High	High	High
FALSE	High	Master Protein	Dlo_pri0563F.1_g00280.1	Dlo_pri0563F.1_g00280.1	0	20.867	12	4	12	3	447	51.2	5.19	211	4	0	1	0.913	0.984	0.951	1.077	1.041	0.967	1	1	1	1	1	1	104	94.9	102.3	98.9	3.11	6.22	5.02	3.63	High	High	High	High	High	High	High	High	High	High	High	High
FALSE	High	Master Protein	Dlo_pri0004F.1_g09260.1	Dlo_pri0004F.1_g09260.1	0	21.826	32	4	12	4	134	14.4	6.95	254	4	0	0	1.281	1.378	1.096	1.076	0.856	0.796	1	1	1	1	1	1	84.1	107.7	115.9	92.2	2.72	3.93	6.65	7.49	High	High	High	High	High	High	High	High	High	High	High	High
FALSE	High	Master Protein	Dlo_pri0046F.1_g02990.1	Dlo_pri0046F.1_g02990.1	0	11.54	3	2	12	1	610	68.9	9.19	286	2	0	1	1.402	1.36	1.547	0.97	1.103	1.138	1	1	1	1	1	1	75.3	105.6	102.5	116.6	11.79	6.52	7.59	5.84	High	High	High	High	High	High	High	High	High	High	High	High
FALSE	High	Master Protein	Dlo_pri0030F.1_g03890.1	Dlo_pri0030F.1_g03890.1	0	19.21	17	3	12	1	174	20.2	11.05	386	3	0	2	0.856	0.501	0.973	0.585	1.136	1.942	1	1	1	1	1	1	120.1	102.9	60.2	116.8	0.8	1.49	0.6	1.68	High	High	High	High	High	High	High	High	High	High	High	High
FALSE	High	Master Protein	Dlo_pri0015F.1_g00080.1	Dlo_pri0015F.1_g00080.1	0	15.417	2	2	12	1	1086	121.2	8.16	330	2	0	0	0.782	1.073	0.752	1.371	0.962	0.702	1	1	1	1	1	1	110.9	86.7	118.9	83.4	3.86	2.78	3.27	7.81	High	High	High	High	High	High	High	High	High	High	High	High
FALSE	High	Master Protein	Dlo_pri0047F.1_g01960.1	Dlo_pri0047F.1_g01960.1	0	16.579	29	3	12	3	125	14.4	11.03	296	3	0	0	0.978	0.989	1.01	1.011	1.032	1.02	1	1	1	1	1	1	100.6	98.4	99.5	101.5	0.93	1.46	2.94	2.74	High	High	High	High	High	High	High	High	High	High	High	High
FALSE	High	Master Protein	Dlo_pri0164F.1_g00280.1	Dlo_pri0164F.1_g00280.1	0	28.343	34	4	12	4	160	17.9	5.92	264	4	0	0	0.863	0.94	0.778	1.09	0.902	0.827	1	1	1	1	1	1	111.7	96.4	105	86.9	5.2	9.79	0.57	3.03	High	High	High	High	High	High	High	High	High	High	High	High
FALSE	High	Master Protein	Dlo_pri0626F.1_g00350.1	Dlo_pri0626F.1_g00350.1	0	30.04	24	3	12	3	173	19.3	9.01	365	3	0	0	0.818	0.883	0.872	1.079	1.066	0.988	1	1	1	1	1	1	111.9	91.6	98.9	97.6	1.78	2.16	0.58	0.4	High	High	High	High	High	High	High	High	High	High	High	High
FALSE	High	Master Protein	Dlo_pri0055F.1_g04220.1	Dlo_pri0055F.1_g04220.1	0	19.018	14	5	12	5	377	43.2	8.34	274	5	0	0	0.952	0.892	1.035	0.937	1.086	1.159	1	1	1	1	1	1	103.1	98.2	92	106.7	3.01	1.76	6.02	0.87	High	High	High	High	High	High	High	High	High	High	High	High
FALSE	High	Master Protein	Dlo_pri0159F.1_g00290.1	Dlo_pri0159F.1_g00290.1	0	19.548	21	6	12	6	340	37.2	5.94	264	6	0	0	1.22	1.039	1.461	0.852	1.198	1.406	1	1	1	1	1	1	84.7	103.4	88.1	123.8	9.28	7.14	4.31	3.78	High	High	High	High	High	High	High	High	High	High	High	High
FALSE	High	Master Protein	Dlo_pri0010F.1_g04560.1	Dlo_pri0010F.1_g04560.1	0	28.885	7	5	12	5	752	84.2	5.5	284	5	0	0	0.835	1.046	0.96	1.253	1.151	0.918	1	1	1	1	1	1	104.1	86.9	108.9	100	1.69	2.8	4.7	1.29	High	High	High	High	High	High	High	High	High	High	High	High
FALSE	High	Master Protein	Dlo_pri0002F.1_g07240.1	Dlo_pri0002F.1_g07240.1	0	39.115	24	6	12	6	359	40.3	7.84	341	6	0	0	1.234	1.079	0.96	0.874	0.778	0.89	1	1	1	1	1	1	93.6	115.5	101	89.9	3.57	5.8	4.15	7.34	High	High	High	High	High	High	High	High	High	High	High	High
FALSE	High	Master Protein	Dlo_pri0023F.1_g02300.1	Dlo_pri0023F.1_g02300.1	0	29.733	11	4	12	4	587	65.4	8.35	328	4	0	0	0.859	0.968	0.921	1.126	1.072	0.952	1	1	1	1	1	1	106.7	91.7	103.3	98.3	0.17	1.19	3.68	3.16	High	High	High	High	High	High	High	High	High	High	High	High
FALSE	High	Master Protein	Dlo_pri0380F.1_g00690.1	Dlo_pri0380F.1_g00690.1	0	29.665	24	6	12	6	246	27	8.21	330	6	0	0	0.817	1.019	0.986	1.247	1.207	0.968	1	1	1	1	1	1	104.7	85.5	106.6	103.2	3.9	6.31	1.18	3.67	High	High	High	High	High	High	High	High	High	High	High	High
FALSE	High	Master Protein	Dlo_pri0241F.1_g00590.1	Dlo_pri0241F.1_g00590.1	0	18.303	13	4	12	4	351	39.6	6.65	309	4	0	0	1.277	1.149	1.234	0.9	0.967	1.075	1	1	1	1	1	1	85.8	109.6	98.6	106	1.46	2.95	2.6	4.3	High	High	High	High	High	High	High	High	High	High	High	High
FALSE	High	Master Protein	Dlo_pri0139F.1_g01030.1	Dlo_pri0139F.1_g01030.1	0	29.991	12	5	12	4	544	60.5	8.05	267	5	0	0	0.795	1.138	0.933	1.431	1.173	0.82	1	1	1	1	1	1	103.5	82.3	117.7	96.5	5.4	11.4	2.07	10.79	High	High	High	High	High	High	High	High	High	High	High	High
FALSE	High	Master Protein	Dlo_pri0613F.1_g00280.1	Dlo_pri0613F.1_g00280.1	0	16.374	49	4	12	4	100	10.9	8.07	185	4	0	0	0.886	0.783	0.669	0.885	0.755	0.854	1	1	1	1	1	1	119.8	106.1	93.9	80.2	4.54	4.47	4.83	4.71	High	High	High	High	High	High	High	High	High	High	High	High
FALSE	High	Master Protein	Dlo_pri0024F.1_g00220.1	Dlo_pri0024F.1_g00220.1	0	37.762	9	8	12	4	1074	118.7	4.91	278	8	0	4	0.8	0.901	0.96	1.126	1.201	1.066	1	1	1	1	1	1	109.3	87.4	98.4	104.9	3.46	12.5	6.04	3.07	High	High	High	High	High	High	High	High	High	High	High	High
FALSE	High	Master Protein	Dlo_pri0208F.1_g01680.1	Dlo_pri0208F.1_g01680.1	0	24.377	8	4	12	4	573	65.1	7.43	336	4	0	0	1.735	0.923	1.262	0.532	0.727	1.368	0.0633059	1	1	0.0215408	0.691964	0.496447	81.3	141.1	75	102.6	2.77	2.91	2.52	1.95	High	High	High	High	High	High	High	High	High	High	High	High
FALSE	High	Master Protein	Dlo_pri0098F.1_g02820.1	Dlo_pri0098F.1_g02820.1	0	13.795	28	3	12	3	111	11.8	9.1	310	3	0	0	1.14	0.901	2.567	0.791	2.252	2.848	1	1	0.791045	1	1	0.444428	71.3	81.3	64.3	183.1	5.05	2.31	4.54	3.16	High	High	High	High	High	High	High	High	High	High	High	High
FALSE	High	Master Protein	Dlo_pri0023F.1_g01320.1	Dlo_pri0023F.1_g01320.1	0	26.777	20	5	12	2	310	35.6	9	319	5	0	3	1.097	0.951	0.939	0.868	0.856	0.987	1	1	1	1	1	1	100.3	110	95.5	94.2	0.91	2.94	1.24	3.4	High	High	Not Found	High	High	Not Found	High	High	Not Found	High	High	Not Found
FALSE	High	Master Protein	Dlo_pri0563F.1_g00070.1	Dlo_pri0563F.1_g00070.1	0	24.659	11	6	12	1	620	69.1	6.62	249	6	0	5	0.981	1.01	0.971	1.03	0.991	0.962	1	1	1	1	1	1	101	99	102	98.1	0.88	2.38	1.47	1.22	Not Found	High	High	Not Found	High	High	Not Found	High	High	Not Found	High	High
FALSE	High	Master Protein	Dlo_pri0398F.1_g00560.1	Dlo_pri0398F.1_g00560.1	0	22.553	10	4	12	4	479	52.6	5.48	282	4	0	0	1.237	0.94	1.105	0.76	0.894	1.176	1	1	1	1	1	1	93.4	115.5	87.8	103.3	8.49	8.1	2.52	3.98	High	High	High	High	High	High	High	High	High	High	High	High
FALSE	High	Master Protein	Dlo_pri0046F.1_g00570.1	Dlo_pri0046F.1_g00570.1	0	25.113	10	5	12	3	568	62.9	8.84	270	5	0	0	0.766	0.691	0.602	0.902	0.786	0.871	0.680485	0.274215	0.052031	1	0.579224	1	130.8	100.1	90.4	78.7	6.64	4.44	6.76	2.21	High	High	High	High	High	High	High	High	High	High	High	High
FALSE	High	Master Protein	Dlo_alt0084F-009-01.1_g00050.1	Dlo_alt0084F-009-01.1_g00050.1	0	14.573	9	2	12	1	271	29.8	9.88	329	2	0	1	1.067	1.008	1.07	0.944	1.002	1.061	1	1	1	1	1	1	96.5	103	97.3	103.2	1.44	2.35	1.71	0.38	High	High	High	High	High	High	High	High	High	High	High	High
FALSE	High	Master Protein	Dlo_pri0241F.1_g00970.1	Dlo_pri0241F.1_g00970.1	0	35.741	17	6	12	6	459	50.2	6.2	305	6	0	0	0.943	1.015	1.005	1.077	1.067	0.99	1	1	1	1	1	1	100.9	95.1	102.5	101.5	2.2	4.02	4.25	1.59	High	High	High	High	High	High	High	High	High	High	High	High
FALSE	High	Master Protein	Dlo_pri0049F.1_g04220.1	Dlo_pri0049F.1_g04220.1	0	23.948	23	5	12	5	260	28	7.94	364	5	0	0	0.614	0.803	0.974	1.308	1.587	1.214	1	1	1	1	1	1	118	72.4	94.7	114.9	5.04	6.27	7.01	7.83	High	High	High	High	High	High	High	High	High	High	High	High
FALSE	High	Master Protein	Dlo_pri0264F.1_g01440.1	Dlo_pri0264F.1_g01440.1	0	26.244	18	4	12	4	300	34.2	4.92	425	4	0	0	1.041	1.017	0.962	0.977	0.924	0.946	1	1	1	1	1	1	99.5	103.6	101.2	95.7	2.18	1.02	0.73	1.33	High	High	High	High	High	High	High	High	High	High	High	High
FALSE	High	Master Protein	Dlo_pri0004F.1_g05100.1	Dlo_pri0004F.1_g05100.1	0	23.383	25	3	12	3	158	16.7	4.96	360	3	0	0	0.695	0.871	0.87	1.254	1.252	0.998	0.217249	1	1	0.873622	1	1	116.4	80.9	101.4	101.3	1.12	2.63	0.19	0.78	High	High	High	High	High	High	High	High	High	High	High	High
FALSE	High	Master Protein	Dlo_pri0263F.1_g00450.1	Dlo_pri0263F.1_g00450.1	0	30.468	12	6	12	5	710	78.3	5.54	389	6	0	1	1.234	1.027	0.907	0.832	0.735	0.883	1	1	1	1	1	1	96	118.4	98.6	87.1	2.45	2.76	6.34	6.11	High	High	High	High	High	High	High	High	High	High	High	High
FALSE	High	Master Protein	Dlo_pri0281F.1_g00070.1	Dlo_pri0281F.1_g00070.1	0	27.793	20	7	12	7	469	52.5	6.3	319	7	0	0	1.037	0.951	0.999	0.917	0.963	1.05	1	1	1	1	1	1	100.3	104.1	95.4	100.2	1.45	5.11	6.56	2.91	High	High	High	High	High	High	High	High	High	High	High	High
FALSE	High	Master Protein	Dlo_pri0095F.1_g02390.1	Dlo_pri0095F.1_g02390.1	0	24.689	14	4	12	4	355	40.2	9.09	275	4	0	0	1.087	1.043	1.033	0.96	0.95	0.99	1	1	1	1	1	1	96.1	104.4	100.3	99.2	4.81	6.09	4.21	4.53	High	High	High	High	High	High	High	High	High	High	High	High
FALSE	High	Master Protein	Dlo_pri0668F.1_g00380.1	Dlo_pri0668F.1_g00380.1	0	17.689	18	3	12	3	152	17.5	10.54	231	3	0	0	0.722	1.013	0.973	1.403	1.347	0.96	1	1	1	1	1	1	107.9	77.9	109.3	104.9	6.03	21.64	9.03	2	High	High	High	High	High	High	High	High	High	High	High	High
FALSE	High	Master Protein	Dlo_pri0235F.1_g00400.1	Dlo_pri0235F.1_g00400.1	0	42.9	14	8	12	8	729	81.8	7.72	266	8	0	0	1.336	0.934	1.026	0.699	0.767	1.098	1	1	1	1	1	1	93.1	124.4	87	95.5	1.79	3.25	5.38	2.47	High	High	High	High	High	High	High	High	High	High	High	High
FALSE	High	Master Protein	Dlo_pri0122F.1_g02650.1	Dlo_pri0122F.1_g02650.1	0	35.205	19	7	12	1	452	51.3	7.5	312	7	0	0	0.698	0.973	0.814	1.395	1.166	0.836	1	1	1	1	1	1	114.8	80.1	111.7	93.4	1.68	14.54	9.57	1.01	Not Found	High	High	Not Found	High	High	Not Found	High	High	Not Found	High	High
FALSE	High	Master Protein	Dlo_alt0070F-001-01.1_g00220.1	Dlo_alt0070F-001-01.1_g00220.1	0	42.446	19	5	12	4	478	52.9	5.15	401	5	0	1	0.904	1.028	0.949	1.136	1.05	0.924	1	1	1	1	1	1	103.1	93.2	105.9	97.8	3.61	9.57	12.56	7.12	High	High	High	High	High	High	High	High	High	High	High	High
FALSE	High	Master Protein	Dlo_pri0105F.1_g01150.1	Dlo_pri0105F.1_g01150.1	0	18.262	13	5	12	5	409	47.4	5.83	251	5	0	0	1.048	1.024	0.995	0.977	0.949	0.972	1	1	1	1	1	1	98.4	103.1	100.7	97.9	3.51	8.24	6.32	3.35	High	High	High	High	High	High	High	High	High	High	High	High
FALSE	High	Master Protein	Dlo_pri0170F.1_g00720.1	Dlo_pri0170F.1_g00720.1	0	24.258	15	4	12	4	304	32.7	5.39	324	4	0	0	1.297	1.098	1.087	0.847	0.839	0.99	1	1	1	1	1	1	89.2	115.7	98	97	6.05	6.17	5.07	6.18	High	High	High	High	High	High	High	High	High	High	High	High
FALSE	High	Master Protein	Dlo_pri0340F.1_g01190.1	Dlo_pri0340F.1_g01190.1	0	21.836	21	5	12	2	240	28	7.36	228	5	0	3	1.189	0.993	1.124	0.835	0.946	1.133	1	1	1	1	1	1	92.9	110.5	92.2	104.5	1.61	1.54	4.36	3.73	High	High	Not Found	High	High	Not Found	High	High	Not Found	High	High	Not Found
FALSE	High	Master Protein	Dlo_pri0014F.1_g00230.1	Dlo_pri0014F.1_g00230.1	0	19.75	12	4	12	3	379	41.1	6.52	326	4	0	1	1.297	0.697	0.938	0.537	0.723	1.346	1	1	1	0.0681334	1	1	101.7	131.9	70.9	95.4	2.56	7.22	9.76	1.05	High	High	High	High	High	High	High	High	High	High	High	High
FALSE	High	Master Protein	Dlo_pri0057F.1_g02740.1	Dlo_pri0057F.1_g02740.1	0	19.044	21	3	12	1	179	20	9.72	331	3	0	2	0.91	0.948	0.831	1.042	0.913	0.877	1	1	1	1	1	1	108.4	98.7	102.8	90.1	0.29	0.37	1.2	0.62	High	High	Not Found	High	High	Not Found	High	High	Not Found	High	High	Not Found
FALSE	High	Master Protein	Dlo_pri0050F.1_g02610.1	Dlo_pri0050F.1_g02610.1	0	21.691	18	4	12	4	290	31.7	5.39	271	4	0	0	0.89	1.053	0.925	1.183	1.039	0.878	1	1	1	1	1	1	103.4	92.1	108.9	95.6	2.71	4.71	5.74	5.31	High	High	High	High	High	High	High	High	High	High	High	High
FALSE	High	Master Protein	Dlo_alt0233F-010-01.1_g00060.1	Dlo_alt0233F-010-01.1_g00060.1	0	26.674	14	3	12	3	251	29.3	9.47	364	3	0	0	0.894	0.963	0.951	1.077	1.064	0.988	1	1	1	1	1	1	105.1	93.9	101.1	99.9	2.81	3.68	6.52	6.21	High	High	High	High	High	High	High	High	High	High	High	High
FALSE	High	Master Protein	Dlo_pri0060F.1_g02440.1	Dlo_pri0060F.1_g02440.1	0	36.579	23	5	12	5	416	46.7	6.52	343	5	0	0	1.052	0.955	1.019	0.908	0.969	1.067	1	1	1	1	1	1	99.3	104.5	94.9	101.3	3.71	5.11	7.33	6.72	High	High	High	High	High	High	High	High	High	High	High	High
FALSE	High	Master Protein	Dlo_pri1249F.1_g00220.1	Dlo_pri1249F.1_g00220.1	0	17.527	9	5	12	1	475	53.5	5.87	236	5	0	0	1.09	1.055	1.072	0.968	0.984	1.016	1	1	1	1	1	1	94.9	103.4	100.1	101.7	3.27	1.14	2.52	2.96	High	High	High	High	High	High	High	High	High	High	High	High
FALSE	High	Master Protein	Dlo_pri0015F.1_g03420.1	Dlo_pri0015F.1_g03420.1	0	31.251	24	4	12	4	215	24.3	6.21	379	4	0	0	0.82	1.338	1.061	1.631	1.294	0.793	1	1	1	1	1	1	94.8	77.8	126.8	100.6	4.73	5.65	4.65	6.1	High	High	High	High	High	High	High	High	High	High	High	High
FALSE	High	Master Protein	Dlo_alt0229F-001-01.1_g00010.1	Dlo_alt0229F-001-01.1_g00010.1	0	17.763	13	5	12	2	371	41.8	9.63	353	5	0	0	1.412	1.068	1.164	0.756	0.824	1.089	1	1	1	1	1	1	86.1	121.6	92	100.2	2.95	5.47	5.36	0.81	High	High	Not Found	High	High	Not Found	High	High	Not Found	High	High	Not Found
FALSE	High	Master Protein	Dlo_pri0047F.1_g00760.1	Dlo_pri0047F.1_g00760.1	0	37.044	10	7	12	7	925	100.7	6.43	370	7	0	0	0.836	1.002	0.917	1.198	1.097	0.916	1	1	1	1	1	1	106.5	89	106.7	97.7	2.55	0.44	2.95	3.91	High	High	High	High	High	High	High	High	High	High	High	High
FALSE	High	Master Protein	Dlo_pri0045F.1_g00080.1	Dlo_pri0045F.1_g00080.1	0	21.244	26	6	12	2	245	26.8	7.81	331	6	0	1	0.993	0.918	0.867	0.924	0.873	0.944	1	1	1	1	1	1	105.9	105.2	97.2	91.8	5.35	4.18	3.82	5.85	High	High	High	High	High	High	High	High	High	High	High	High
FALSE	High	Master Protein	Dlo_pri0000F.1_g03190.1	Dlo_pri0000F.1_g03190.1	0	22.399	13	6	11	6	467	51.6	5.35	239	6	0	0	0.918	0.973	0.941	1.059	1.024	0.967	1	1	1	1	1	1	104.4	95.9	101.6	98.2	2.65	10.27	9.49	1.71	High	High	High	High	High	High	High	High	High	High	High	High
FALSE	High	Master Protein	Dlo_pri0097F.1_g01280.1	Dlo_pri0097F.1_g01280.1	0	26.038	16	7	11	4	497	55	8.22	269	7	0	3	0.688	0.738	0.641	1.072	0.932	0.869	1	1	1	1	1	1	130.4	89.7	96.2	83.6	1.91	3.66	6.38	2.1	High	High	High	High	High	High	High	High	High	High	High	High
FALSE	High	Master Protein	Dlo_pri1026F.1_g00170.1	Dlo_pri1026F.1_g00170.1	0	17.626	20	3	11	1	192	21.8	8.95	275	3	0	0	0.876	1.017	0.978	1.162	1.117	0.961	1	1	1	1	1	1	103.4	90.5	105.1	101	2.3	2.83	6.56	1.73	High	High	High	High	High	High	High	High	High	High	High	High
FALSE	High	Master Protein	Dlo_pri0755F.1_g00350.1	Dlo_pri0755F.1_g00350.1	0	20.569	8	5	11	4	755	83.7	5.17	229	5	0	1	1.005	0.981	1.125	0.976	1.119	1.146	1	1	1	1	1	1	97.3	97.8	95.5	109.5	1.72	1.8	1.53	2.11	High	High	High	High	High	High	High	High	High	High	High	High
FALSE	High	Master Protein	Dlo_alt0567F-001-01.1_g00010.1	Dlo_alt0567F-001-01.1_g00010.1	0	17.547	13	4	11	2	397	43.9	5.9	244	4	0	0	1.136	1.043	1.19	0.919	1.048	1.141	1	1	1	1	1	1	91.5	104	95.5	108.9	1.29	15.9	8.04	9.29	High	Not Found	High	High	Not Found	High	High	Not Found	High	High	Not Found	High
FALSE	High	Master Protein	Dlo_pri0143F.1_g00990.1	Dlo_pri0143F.1_g00990.1	0	29.826	12	6	11	6	729	80.6	6.15	299	6	0	0	0.926	0.964	0.905	1.041	0.978	0.939	1	1	1	1	1	1	105.4	97.6	101.6	95.4	3.12	3.82	2.36	2.63	High	High	High	High	High	High	High	High	High	High	High	High
FALSE	High	Master Protein	Dlo_pri0362F.1_g01020.1	Dlo_pri0362F.1_g01020.1	0	21.064	14	4	11	2	368	40.1	6.27	288	4	0	2	0.935	0.841	0.746	0.9	0.798	0.887	1	1	1	1	1	1	113.6	106.2	95.5	84.7	2.09	1.92	1.68	3.42	High	High	High	High	High	High	High	High	High	High	High	High
FALSE	High	Master Protein	Dlo_pri1054F.1_g00050.1	Dlo_pri1054F.1_g00050.1	0	26.965	8	7	11	4	1065	115.8	5.2	205	7	0	3	0.836	1.257	0.916	1.503	1.095	0.729	1	1	1	1	1	1	99.8	83.4	125.4	91.4	0.43	2.76	0.93	1.4	High	High	Not Found	High	High	Not Found	High	High	Not Found	High	High	Not Found
FALSE	High	Master Protein	Dlo_pri0024F.1_g01410.1	Dlo_pri0024F.1_g01410.1	0	18.966	24	3	11	1	123	14.4	11.02	368	3	0	0	1.211	0.649	1.031	0.536	0.851	1.588	1	1	1	1	1	1	102.8	124.5	66.7	106	5.79	8.3	5.12	0.93	High	Not Found	High	High	Not Found	High	High	Not Found	High	High	Not Found	High
FALSE	High	Master Protein	Dlo_pri0384F.1_g00210.1	Dlo_pri0384F.1_g00210.1	0	27.83	22	5	11	5	329	37.7	5.5	294	5	0	0	1.122	0.892	1.122	0.794	1	1.258	1	1	1	1	1	1	96.7	108.6	86.2	108.5	2.29	1.75	2.38	1.12	High	High	High	High	High	High	High	High	High	High	High	High
FALSE	High	Master Protein	Dlo_pri0292F.1_g00960.1	Dlo_pri0292F.1_g00960.1	0	20.99	22	2	11	2	195	21.6	10.61	406	2	0	0	1.599	0.997	1.363	0.623	0.852	1.367	1	1	1	1	1	1	80.7	129	80.4	109.9	6.58	5.88	5.88	4.06	High	High	High	High	High	High	High	High	High	High	High	High
FALSE	High	Master Protein	Dlo_pri0033F.1_g00640.1	Dlo_pri0033F.1_g00640.1	0	24.676	11	5	11	5	706	75.6	6.32	286	5	0	0	1.433	1.238	1.038	0.864	0.724	0.839	1	1	1	1	1	1	85	121.7	105.1	88.2	4	3.41	5.45	6.93	High	High	High	High	High	High	High	High	High	High	High	High
FALSE	High	Master Protein	Dlo_pri0067F.1_g00100.1	Dlo_pri0067F.1_g00100.1	0	40.229	11	6	11	6	804	87.8	8.78	298	6	0	0	1.139	1.18	0.989	1.036	0.868	0.838	1	1	1	1	1	1	92.8	105.8	109.6	91.8	0.8	2.5	2.72	2.61	High	High	High	High	High	High	High	High	High	High	High	High
FALSE	High	Master Protein	Dlo_pri0791F.1_g00500.1	Dlo_pri0791F.1_g00500.1	0	30.553	27	3	11	3	140	15	10.39	303	3	0	0	0.961	1.004	0.977	1.045	1.017	0.973	1	1	1	1	1	1	101.5	97.5	101.9	99.1	2.96	0.93	2.71	0.89	High	High	High	High	High	High	High	High	High	High	High	High
FALSE	High	Master Protein	Dlo_pri0025F.1_g02000.1	Dlo_pri0025F.1_g02000.1	0	22.708	28	4	11	2	215	24.2	5.49	310	4	0	0	0.965	1.084	0.789	1.123	0.818	0.729	1	1	0.792912	1	1	0.281208	104.2	100.5	112.9	82.3	1.79	1.75	3.55	2.59	High	High	High	High	High	High	High	High	High	High	High	High
FALSE	High	Master Protein	Dlo_pri0120F.1_g01120.1	Dlo_pri0120F.1_g01120.1	0	35.961	12	7	11	7	821	91.2	5.92	277	7	0	0	0.915	1.013	1.02	1.107	1.115	1.007	1	1	1	1	1	1	101.3	92.7	102.6	103.3	3.32	7.8	8.14	3.48	High	High	High	High	High	High	High	High	High	High	High	High
FALSE	High	Master Protein	Dlo_alt0222F-004-01.1_g00060.1	Dlo_alt0222F-004-01.1_g00060.1	0	15.103	10	4	11	3	430	48.2	7.72	180	4	0	1	0.439	0.997	0.773	2.273	1.763	0.775	1	1	1	1	1	1	124.6	54.7	124.3	96.4	5.56	14.61	4.17	5.05	High	High	High	High	High	High	High	High	High	High	High	High
FALSE	High	Master Protein	Dlo_pri0067F.1_g02820.1	Dlo_pri0067F.1_g02820.1	0	15.92	2	4	11	1	1830	203.6	6.52	202	4	0	0	0.846	1.153	0.752	1.363	0.889	0.652							106.6	90.2	123	80.2					High	Not Found	Not Found	High	Not Found	Not Found	High	Not Found	Not Found	High	Not Found	Not Found
FALSE	High	Master Protein	Dlo_pri0101F.1_g00740.1	Dlo_pri0101F.1_g00740.1	0	26.014	14	5	11	5	467	51.3	5.45	229	5	0	0	0.876	1.025	0.905	1.17	1.033	0.883	1	1	1	1	1	1	105.1	92.1	107.7	95.1	3.86	0.68	2.51	4.11	High	High	High	High	High	High	High	High	High	High	High	High
FALSE	High	Master Protein	Dlo_alt0001F-028-01.1_g00110.1	Dlo_alt0001F-028-01.1_g00110.1	0	28.832	6	6	11	6	1197	132.5	6.25	306	6	0	0	0.944	1	0.998	1.059	1.058	0.999	1	1	1	1	1	1	101.5	95.8	101.5	101.3	3	8.46	8.32	0.32	High	High	High	High	High	High	High	High	High	High	High	High
FALSE	High	Master Protein	Dlo_pri0075F.1_g01620.1	Dlo_pri0075F.1_g01620.1	0	20.333	12	3	11	3	351	38	7.24	215	3	0	0	0.965	0.868	0.821	0.899	0.851	0.946	1	1	1	1	1	1	109.5	105.6	95	89.9	1.32	3.13	3.29	1.58	High	High	High	High	High	High	High	High	High	High	High	High
FALSE	High	Master Protein	Dlo_pri0383F.1_g00890.1	Dlo_pri0383F.1_g00890.1	0	27.336	19	7	11	2	430	45.9	5.38	199	7	0	5	1.018	0.946	1.041	0.93	1.023	1.1	1	1	1	1	1	1	99.9	101.6	94.5	104	3.97	7.48	10.94	3.7	High	Not Found	Not Found	High	Not Found	Not Found	High	Not Found	Not Found	High	Not Found	Not Found
FALSE	High	Master Protein	Dlo_pri0179F.1_g00220.1	Dlo_pri0179F.1_g00220.1	0	25.965	26	5	11	5	255	28.5	5.52	257	5	0	0	0.998	0.966	0.896	0.968	0.898	0.928	1	1	1	1	1	1	103.6	103.4	100.1	92.9	4.56	2.72	4.52	5.52	High	High	High	High	High	High	High	High	High	High	High	High
FALSE	High	Master Protein	Dlo_pri0119F.1_g00880.1	Dlo_pri0119F.1_g00880.1	0	17.412	10	4	11	4	381	42.9	6.33	260	4	0	0	0.937	1.101	0.878	1.174	0.937	0.798	1	1	1	1	1	1	102.2	95.7	112.4	89.7	2.58	7.42	2.85	2.23	High	High	High	High	High	High	High	High	High	High	High	High
FALSE	High	Master Protein	Dlo_pri0229F.1_g01830.1	Dlo_pri0229F.1_g01830.1	0	23.272	14	4	11	4	439	49.3	8.6	297	4	0	0	0.982	0.95	0.905	0.967	0.922	0.953	1	1	1	1	1	1	104.2	102.4	99	94.4	2.52	4.45	2.38	7.86	High	High	High	High	High	High	High	High	High	High	High	High
FALSE	High	Master Protein	Dlo_pri0025F.1_g05440.1	Dlo_pri0025F.1_g05440.1	0	33.883	6	2	11	2	315	34.5	8.15	404	2	0	0	1.257	1.01	1.082	0.804	0.86	1.071	0.8564	1	1	1	1	1	92	115.6	92.9	99.5	2.49	0.94	1.45	2.43	High	High	High	High	High	High	High	High	High	High	High	High
FALSE	High	Master Protein	Dlo_pri0173F.1_g00130.1	Dlo_pri0173F.1_g00130.1	0	27.511	10	4	11	3	618	69.2	5.83	364	4	0	1	1.385	0.972	1.312	0.702	0.948	1.35	1	1	1	1	1	1	85.7	118.6	83.3	112.4	6.52	6.83	10.31	6.36	High	High	High	High	High	High	High	High	High	High	High	High
FALSE	High	Master Protein	Dlo_pri0661F.1_g00330.1	Dlo_pri0661F.1_g00330.1	0	23.526	21	4	11	3	243	26.3	5.03	268	4	0	1	0.817	1.063	0.814	1.302	0.996	0.765	1	1	1	1	1	1	108.3	88.4	115.1	88.1	4.21	7.55	7.28	5.23	High	High	High	High	High	High	High	High	High	High	High	High
FALSE	High	Master Protein	Dlo_pri0015F.1_g03590.1	Dlo_pri0015F.1_g03590.1	0	22.562	16	5	11	5	343	38.2	7.52	284	5	0	0	1.181	0.996	1.321	0.844	1.119	1.326	1	1	1	1	1	1	88.9	105	88.6	117.5	2.87	9.26	6.57	1.48	High	High	High	High	High	High	High	High	High	High	High	High
FALSE	High	Master Protein	Dlo_pri0031F.1_g00320.1	Dlo_pri0031F.1_g00320.1	0	22.104	15	4	11	4	316	36.1	6.81	264	4	0	0	0.906	1.041	1.013	1.15	1.118	0.972	1	1	1	1	1	1	101	91.5	105.2	102.3	0.87	14.08	10.13	3.47	High	High	High	High	High	High	High	High	High	High	High	High
FALSE	High	Master Protein	Dlo_alt0015F-011-01.1_g00090.1	Dlo_alt0015F-011-01.1_g00090.1	0	13.488	16	4	11	3	267	29.5	7.5	185	4	0	0	0.578	0.895	0.998	1.549	1.729	1.116	1	1	1	1	1	1	115.3	66.6	103.1	115.1	7.32	2.84	1.04	4.77	High	High	High	High	High	High	High	High	High	High	High	High
FALSE	High	Master Protein	Dlo_pri0095F.1_g02280.1	Dlo_pri0095F.1_g02280.1	0	16.183	27	3	11	1	132	15.5	5.71	261	3	0	0	0.812	0.951	0.804	1.171	0.99	0.845	1	1	1	1	1	1	112.1	91.1	106.7	90.2	2.03	3.07	1.15	0.67	High	High	High	High	High	High	High	High	High	High	High	High
FALSE	High	Master Protein	Dlo_pri0128F.1_g00860.1	Dlo_pri0128F.1_g00860.1	0	12.845	24	2	11	1	112	12.9	10.58	273	2	0	1	1.129	1.034	1.001	0.915	0.886	0.968	1	1	1	1	1	1	96.1	108.5	99.3	96.1	3.18	1	2.85	6.49	High	Not Found	High	High	Not Found	High	High	Not Found	High	High	Not Found	High
FALSE	High	Master Protein	Dlo_pri0084F.1_g00640.1	Dlo_pri0084F.1_g00640.1	0	20.469	5	5	11	5	1084	121	5.78	217	5	0	0	0.59	1.118	0.88	1.894	1.491	0.787	1	1	1	1	1	1	111.5	65.8	124.6	98.1	1.87	5.27	1.14	1.03	High	High	High	High	High	High	High	High	High	High	High	High
FALSE	High	Master Protein	Dlo_pri0183F.1_g01900.1	Dlo_pri0183F.1_g01900.1	0	38.319	12	4	11	4	441	49.9	6.86	433	4	0	0	0.945	0.96	0.903	1.015	0.956	0.941	1	1	1	1	1	1	105	99.3	100.8	94.9	1.27	2.8	0.8	1.29	High	High	High	High	High	High	High	High	High	High	High	High
FALSE	High	Master Protein	Dlo_alt0129F-008-01.1_g00310.1	Dlo_alt0129F-008-01.1_g00310.1	0	29.902	12	7	11	5	643	70.5	7.49	202	7	0	2	0.852	1.034	0.883	1.213	1.037	0.854	1	1	1	1	1	1	106.1	90.4	109.7	93.7	2.23	2.38	1.33	3.3	High	High	High	High	High	High	High	High	High	High	High	High
FALSE	High	Master Protein	Dlo_pri0050F.1_g01710.1	Dlo_pri0050F.1_g01710.1	0	10.937	11	3	11	1	227	24.7	7.31	284	3	0	0	0.76	1.564	2.198	2.059	2.894	1.406	1	1	0.212611	0.194461	0.066345	1	72.4	55	113.3	159.2	2.01	3.71	2.55	1.31	High	High	High	High	High	High	High	High	High	High	High	High
FALSE	High	Master Protein	Dlo_alt0001F-026-01.1_g00020.1	Dlo_alt0001F-026-01.1_g00020.1	0	24.007	6	5	11	5	1163	130.6	8.47	313	5	0	0	1.066	1.047	0.983	0.982	0.922	0.939	1	1	1	1	1	1	97.6	104.1	102.2	96	3.36	3.51	2.26	1.79	High	High	High	High	High	High	High	High	High	High	High	High
FALSE	High	Master Protein	Dlo_pri0015F.1_g03640.1	Dlo_pri0015F.1_g03640.1	0	17.642	29	3	11	3	192	21.1	4.5	397	3	0	0	1.059	1.052	0.971	0.994	0.917	0.923	1	1	1	1	1	1	98	103.7	103.1	95.2	3.83	2.72	0.65	0.82	High	High	High	High	High	High	High	High	High	High	High	High
FALSE	High	Master Protein	Dlo_pri0332F.1_g00130.1	Dlo_pri0332F.1_g00130.1	0	30.626	12	6	11	1	620	69	6.37	262	6	0	0	0.923	1.009	0.928	1.093	1.006	0.92							103.7	95.6	104.6	96.2					Not Found	Not Found	High	Not Found	Not Found	High	Not Found	Not Found	High	Not Found	Not Found	High
FALSE	High	Master Protein	Dlo_pri0219F.1_g00910.1	Dlo_pri0219F.1_g00910.1	0	36.96	16	5	11	5	475	51.9	7.61	315	5	0	0	1.419	0.944	1.077	0.665	0.759	1.141	1	1	1	1	1	1	90.1	127.8	85	97	0.79	1.22	0.69	0.27	High	High	High	High	High	High	High	High	High	High	High	High
FALSE	High	Master Protein	Dlo_pri0185F.1_g00360.1	Dlo_pri0185F.1_g00360.1	0	26.375	17	5	11	5	386	43.5	7.9	226	5	0	0	1.141	1.043	1.362	0.914	1.194	1.307	1	1	0.247174	1	1	0.29676	88	100.4	91.7	119.9	2.21	3.69	2.11	2.22	High	High	High	High	High	High	High	High	High	High	High	High
FALSE	High	Master Protein	Dlo_pri0040F.1_g01320.1	Dlo_pri0040F.1_g01320.1	0	15.428	7	3	11	2	490	56.4	6.14	229	3	0	0	0.929	1.223	0.892	1.316	0.96	0.729	1	1	1	1	1	1	98.9	91.9	121	88.2	13.11	19.06	7.78	6.3	High	High	High	High	High	High	High	High	High	High	High	High
FALSE	High	Master Protein	Dlo_pri0103F.1_g01550.1	Dlo_pri0103F.1_g01550.1	0	22.611	12	4	11	4	484	52.4	6.39	251	4	0	0	0.964	0.965	0.954	1.002	0.99	0.989	1	1	1	1	1	1	103	99.3	99.4	98.3	2.01	19.09	11.73	3.25	High	High	High	High	High	High	High	High	High	High	High	High
FALSE	High	Master Protein	Dlo_pri0095F.1_g00080.1	Dlo_pri0095F.1_g00080.1	0	23.621	10	5	11	5	636	71.4	5.77	311	5	0	0	0.921	0.867	0.891	0.942	0.967	1.027	1	1	1	1	1	1	108.7	100.1	94.3	96.8	1.57	2.51	7.49	3.38	High	High	High	High	High	High	High	High	High	High	High	High
FALSE	High	Master Protein	Dlo_pri0243F.1_g00800.1	Dlo_pri0243F.1_g00800.1	0	20.959	16	5	11	5	458	49.8	5.77	217	5	0	0	1.025	0.982	0.947	0.958	0.924	0.965	1	1	1	1	1	1	101.2	103.7	99.3	95.8	0.95	6.23	3.53	2.74	High	High	High	High	High	High	High	High	High	High	High	High
FALSE	High	Master Protein	Dlo_pri0004F.1_g01610.1	Dlo_pri0004F.1_g01610.1	0	25.827	16	7	11	7	496	53.4	6.06	255	7	0	0	0.96	1.076	0.98	1.121	1.021	0.911	1	1	1	1	1	1	99.6	95.6	107.2	97.6	3.78	5.52	7.03	6.67	High	High	High	High	High	High	High	High	High	High	High	High
FALSE	High	Master Protein	Dlo_pri1180F.1_g00110.1	Dlo_pri1180F.1_g00110.1	0	26.634	7	5	11	5	979	108	4.96	383	5	0	0	0.89	1.016	0.935	1.142	1.051	0.92	1	1	1	1	1	1	104.1	92.7	105.8	97.4	0.99	2.23	2.93	2.76	High	High	High	High	High	High	High	High	High	High	High	High
FALSE	High	Master Protein	Dlo_pri0001F.1_g02250.1	Dlo_pri0001F.1_g02250.1	0	26.738	7	5	11	5	785	86.3	5.85	213	5	0	0	1.038	1.046	1.641	1.008	1.581	1.568	1	1	0.0669998	1	0.066345	0.0486535	84.7	87.8	88.6	138.9	1.17	5.62	6.24	7.71	High	High	High	High	High	High	High	High	High	High	High	High
FALSE	High	Master Protein	Dlo_pri0079F.1_g02600.1	Dlo_pri0079F.1_g02600.1	0	20.492	13	5	11	1	423	46.5	5.6	212	5	0	1	0.82	1.181	0.97	1.441	1.184	0.821	1	1	1	1	1	1	100.7	82.6	119	97.7	16.47	0.74	10.69	4.66	Not Found	Not Found	High	Not Found	Not Found	High	Not Found	Not Found	High	Not Found	Not Found	High
FALSE	High	Master Protein	Dlo_pri0001F.1_g11280.1	Dlo_pri0001F.1_g11280.1	0	28.743	14	4	11	4	342	37.8	6.52	400	4	0	0	0.875	1.007	0.869	1.151	0.993	0.863	1	1	1	1	1	1	106.6	93.3	107.4	92.6	2.46	0.37	4.16	7.47	High	High	High	High	High	High	High	High	High	High	High	High
FALSE	High	Master Protein	Dlo_pri0061F.1_g03860.1	Dlo_pri0061F.1_g03860.1	0	18.688	12	4	11	3	317	36.1	6.46	274	4	0	0	0.972	0.941	1.124	0.968	1.156	1.195	1	1	1	1	1	1	99.1	96.3	93.2	111.4	5.89	3.65	7.24	3.81	High	High	High	High	High	High	High	High	High	High	High	High
FALSE	High	Master Protein	Dlo_pri0021F.1_g07070.1	Dlo_pri0021F.1_g07070.1	0	28.054	8	5	11	5	930	105.9	6.13	290	5	0	0	0.852	0.924	0.89	1.084	1.045	0.964	1	1	1	1	1	1	109.1	92.9	100.8	97.1	2.99	3.98	1.26	3.74	High	High	High	High	High	High	High	High	High	High	High	High
FALSE	High	Master Protein	Dlo_pri0050F.1_g00260.1	Dlo_pri0050F.1_g00260.1	0	17.009	31	4	11	2	146	16.4	10.67	256	4	0	0	1.087	0.934	1.328	0.859	1.222	1.423	1	1	1	1	1	1	92	100	85.9	122.2	11.79	12.25	14.99	9.57	High	High	High	High	High	High	High	High	High	High	High	High
FALSE	High	Master Protein	Dlo_pri0246F.1_g00210.1	Dlo_pri0246F.1_g00210.1	0	26.793	17	4	11	2	287	32.9	9.31	404	4	0	1	1.054	1.07	1.753	1.015	1.664	1.639	1	1	1	1	1	1	82	86.4	87.8	143.8	3.94	5.17	3.57	3.22	High	High	High	High	High	High	High	High	High	High	High	High
FALSE	High	Master Protein	Dlo_alt0007F-003-01.1_g00030.1	Dlo_alt0007F-003-01.1_g00030.1	0	28.797	39	5	11	3	188	20	6.13	298	5	0	2	1.122	1.158	1.004	1.032	0.895	0.867	1	1	1	1	1	1	93.4	104.7	108.1	93.7	4.08	4.45	3.01	7.75	High	High	High	High	High	High	High	High	High	High	High	High
FALSE	High	Master Protein	Dlo_pri0010F.1_g05950.1	Dlo_pri0010F.1_g05950.1	0	29.878	10	7	11	7	841	94.3	6.58	236	7	0	0	0.829	0.936	0.98	1.129	1.183	1.047	1	1	1	1	1	1	106.8	88.5	100	104.7	3.53	1.93	2.14	2.25	High	High	High	High	High	High	High	High	High	High	High	High
FALSE	High	Master Protein	Dlo_pri0169F.1_g02250.1	Dlo_pri0169F.1_g02250.1	0	28.461	9	4	11	1	595	66.3	8.6	323	4	0	0	1.333	1.19	0.934	0.893	0.701	0.785	1	1	1	1	1	1	89.8	119.6	106.8	83.8	3.95	7.88	4.53	4.08	High	High	High	High	High	High	High	High	High	High	High	High
FALSE	High	Master Protein	Dlo_pri0194F.1_g01320.1	Dlo_pri0194F.1_g01320.1	0	19.95	11	4	11	1	374	42.2	8.82	273	4	0	0																					Not Found	High	Not Found	Not Found	High	Not Found	Not Found	High	Not Found	Not Found	High	Not Found
FALSE	High	Master Protein	Dlo_pri0033F.1_g01800.1	Dlo_pri0033F.1_g01800.1	0	24.803	30	4	11	4	200	21.3	7.88	415	4	0	0	1.07	0.888	0.938	0.83	0.877	1.057	1	1	1	1	1	1	102.7	109.8	91.2	96.4	1.41	5.23	6.58	2.16	High	High	High	High	High	High	High	High	High	High	High	High
FALSE	High	Master Protein	Dlo_pri0194F.1_g01090.1	Dlo_pri0194F.1_g01090.1	0	26.462	23	5	11	5	324	34.6	5.78	249	5	0	0	1.09	0.92	0.962	0.844	0.882	1.045	1	1	1	1	1	1	100.7	109.8	92.6	96.9	0.76	2.97	3.37	1.04	High	High	High	High	High	High	High	High	High	High	High	High
FALSE	High	Master Protein	Dlo_pri0355F.1_g00840.1	Dlo_pri0355F.1_g00840.1	0	26.064	5	6	11	6	1499	168.4	4.53	239	6	0	0	0.761	0.967	0.874	1.271	1.149	0.904	1	1	1	1	1	1	111.1	84.5	107.4	97.1	4.96	6.82	0.76	0.92	High	High	High	High	High	High	High	High	High	High	High	High
FALSE	High	Master Protein	Dlo_pri0053F.1_g02970.1	Dlo_pri0053F.1_g02970.1	0	18.786	11	3	11	1	390	44.2	10.15	274	3	0	0	1.103	1.134	0.894	1.028	0.81	0.788	1	1	1	1	1	1	96.8	106.8	109.8	86.5	3.18	5.71	3.76	4.43	High	High	High	High	High	High	High	High	High	High	High	High
FALSE	High	Master Protein	Dlo_pri0178F.1_g02090.1	Dlo_pri0178F.1_g02090.1	0	22.922	8	7	11	2	877	96.2	8.87	183	7	0	0	1.059	0.96	0.941	0.906	0.889	0.981							101	107	97	95.1					High	High	Not Found	High	High	Not Found	High	High	Not Found	High	High	Not Found
FALSE	High	Master Protein	Dlo_pri0164F.1_g01730.1	Dlo_pri0164F.1_g01730.1	0	23.124	14	5	11	5	428	46	8.16	269	5	0	0	0.89	0.951	0.927	1.068	1.041	0.975	1	1	1	1	1	1	106.2	94.5	100.9	98.4	3.29	6.34	3.37	1.44	High	High	High	High	High	High	High	High	High	High	High	High
FALSE	High	Master Protein	Dlo_pri0659F.1_g00640.1	Dlo_pri0659F.1_g00640.1	0	30.031	10	4	11	4	483	53.5	5.68	404	4	0	0	1.224	1.039	1.168	0.849	0.954	1.124	0.106848	1	0.312165	0.130559	1	0.559262	90.3	110.5	93.8	105.4	1.99	2.67	2.29	0.83	High	High	High	High	High	High	High	High	High	High	High	High
FALSE	High	Master Protein	Dlo_pri1202F.1_g00160.1	Dlo_pri1202F.1_g00160.1	0	39.052	22	6	11	5	362	39.9	4.87	386	6	0	0	1.223	0.967	1.112	0.79	0.909	1.151	1	1	1	1	1	1	93	113.7	89.9	103.4	0.69	2.47	5.66	2.83	High	High	Not Found	High	High	Not Found	High	High	Not Found	High	High	Not Found
FALSE	High	Master Protein	Dlo_pri0357F.1_g00820.1	Dlo_pri0357F.1_g00820.1	0	25.629	20	4	11	4	225	24.2	5.07	329	4	0	0	1.279	0.888	0.855	0.694	0.669	0.963	1	1	1	1	1	1	99.4	127.2	88.3	85	1.86	1.2	2.71	0.22	High	High	High	High	High	High	High	High	High	High	High	High
FALSE	High	Master Protein	Dlo_pri0133F.1_g01490.1	Dlo_pri0133F.1_g01490.1	0	25.719	23	4	11	1	183	20.8	10.3	236	4	0	0	1.339	1.066	1.051	0.796	0.785	0.986	0.489839	1	1	0.778008	0.93169	1	89.8	120.2	95.7	94.4	2.17	2.36	0.52	4.55	High	Not Found	High	High	Not Found	High	High	Not Found	High	High	Not Found	High
FALSE	High	Master Protein	Dlo_pri1370F.1_g00020.1	Dlo_pri1370F.1_g00020.1	0	18.47	18	4	11	3	285	32.4	5.17	250	4	0	0	0.919	0.997	1.09	1.085	1.185	1.093	1	1	1	1	1	1	99.8	91.8	99.6	108.8	2.04	2.11	0.67	0.94	High	High	High	High	High	High	High	High	High	High	High	High
FALSE	High	Master Protein	Dlo_pri0545F.1_g00660.1	Dlo_pri0545F.1_g00660.1	0	34.445	13	6	11	6	681	77.3	7.49	250	6	0	0	1.275	0.975	1.101	0.765	0.863	1.129	1	1	1	1	1	1	91.9	117.2	89.6	101.2	6.09	2.38	4.12	3.89	High	High	High	High	High	High	High	High	High	High	High	High
FALSE	High	Master Protein	Dlo_pri0508F.1_g00810.1	Dlo_pri0508F.1_g00810.1	0	22.078	12	4	11	3	447	49.9	7.9	305	4	0	1	0.974	1.085	1.356	1.114	1.393	1.25	1	1	1	1	1	1	90.6	88.2	98.3	122.9	2.17	3.67	3.04	2.19	High	High	High	High	High	High	High	High	High	High	High	High
FALSE	High	Master Protein	Dlo_pri0164F.1_g00320.1	Dlo_pri0164F.1_g00320.1	0	30.436	13	5	11	4	473	47.7	7.21	215	5	0	1	0.894	1.088	0.851	1.217	0.952	0.782	1	1	1	1	1	1	104.4	93.3	113.5	88.8	2.06	1.31	1.48	3.09	High	High	High	High	High	High	High	High	High	High	High	High
FALSE	High	Master Protein	Dlo_pri0205F.1_g00800.1	Dlo_pri0205F.1_g00800.1	0	11.223	10	2	11	2	122	13.7	7.99	244	2	0	0	1.164	0.941	0.94	0.809	0.808	0.999	1	1	1	1	1	1	98.9	115.1	93.1	93	0.61	0.42	2.81	2.94	Not Found	High	High	Not Found	High	High	Not Found	High	High	Not Found	High	High
FALSE	High	Master Protein	Dlo_pri0084F.1_g02300.1	Dlo_pri0084F.1_g02300.1	0	34.687	10	8	11	8	1003	110.4	5.03	282	8	0	0	0.98	0.999	0.86	1.019	0.878	0.861	1	1	1	1	1	1	104.2	102.1	104.1	89.6	2.16	2.6	5.21	1.15	High	High	High	High	High	High	High	High	High	High	High	High
FALSE	High	Master Protein	Dlo_alt0369F-003-01.1_g00280.1	Dlo_alt0369F-003-01.1_g00280.1	0	23.797	11	3	10	1	425	46	7.74	317	3	0	0	1.14	1.227	1.145	1.076	1.004	0.933	0.400286	0.188027	0.44351	1	1	1	88.7	101.1	108.7	101.5	4.2	0.82	2.31	2.2	High	High	High	High	High	High	High	High	High	High	High	High
FALSE	High	Master Protein	Dlo_pri0324F.1_g01180.1	Dlo_pri0324F.1_g01180.1	0	23.629	26	2	10	2	122	13.1	4.88	323	2	0	0	1.043	1.094	1.02	1.049	0.977	0.932	1	1	1	1	1	1	96.2	100.4	105.3	98.1	1.12	1.15	1.48	1.54	High	High	High	High	High	High	High	High	High	High	High	High
FALSE	High	Master Protein	Dlo_alt0188F-003-01.1_g00020.1	Dlo_alt0188F-003-01.1_g00020.1	0	13.258	6	2	10	2	571	62.4	8.87	237	2	0	0	0.927	0.944	0.968	1.019	1.044	1.025	1	1	1	1	1	1	104.2	96.6	98.4	100.8	3.69	2.8	4.81	3.84	High	High	High	High	High	High	High	High	High	High	High	High
FALSE	High	Master Protein	Dlo_pri0057F.1_g01320.1	Dlo_pri0057F.1_g01320.1	0	23.357	9	6	10	6	723	81.4	9.19	235	6	0	0	0.853	1.048	0.98	1.229	1.149	0.935	1	1	1	1	1	1	103.1	87.9	108	101	3.09	4.58	4.91	3.97	High	High	High	High	High	High	High	High	High	High	High	High
FALSE	High	Master Protein	Dlo_pri0045F.1_g03450.1	Dlo_pri0045F.1_g03450.1	0	15.76	9	4	10	1	475	52	6.1	215	4	0	0	0.628	1.522	1	2.424	1.593	0.657	0.0745686	0.190362	1	0.0013905	0.0725988	0.094557	96.4	60.5	146.7	96.4	0.31	2.25	1.41	1.41	High	High	High	High	High	High	High	High	High	High	High	High
FALSE	High	Master Protein	Dlo_pri0970F.1_g00250.1	Dlo_pri0970F.1_g00250.1	0	26.78	21	6	10	6	260	28.7	5.19	225	6	0	0	1.02	0.944	0.941	0.925	0.922	0.997	1	1	1	1	1	1	102.4	104.5	96.7	96.4	0.25	4.96	2.33	2.74	High	High	High	High	High	High	High	High	High	High	High	High
FALSE	High	Master Protein	Dlo_alt0000F-031-01.1_g00100.1	Dlo_alt0000F-031-01.1_g00100.1	0	16.995	12	5	10	5	400	43.5	9.25	157	5	0	0	1.074	0.87	0.944	0.81	0.879	1.085	1	1	1	1	1	1	102.9	110.5	89.5	97.1	6.76	3.21	5.37	5.56	High	High	High	High	High	High	High	High	High	High	High	High
FALSE	High	Master Protein	Dlo_pri0121F.1_g01990.1	Dlo_pri0121F.1_g01990.1	0	29.188	7	4	10	4	670	74.1	5.74	306	4	0	0	1.268	1.058	1.219	0.834	0.961	1.152	1	1	1	1	1	1	88	111.6	93.1	107.2	7.25	2.69	5.52	2.34	High	High	High	High	High	High	High	High	High	High	High	High
FALSE	High	Master Protein	Dlo_alt0134F-004-01-1.1_g00010.1	Dlo_alt0134F-004-01-1.1_g00010.1	0	15.666	23	3	10	1	154	17.6	10.39	348	3	0	0	1.294	0.978	1.062	0.756	0.821	1.086	1	1	1	1	1	1	92.3	119.4	90.3	98	0.91	1.94	1.27	0.81	High	High	High	High	High	High	High	High	High	High	High	High
FALSE	High	Master Protein	Dlo_pri0986F.1_g00030.1	Dlo_pri0986F.1_g00030.1	0	15.436	22	3	10	3	148	16.4	6.24	330	3	0	0	0.927	0.962	0.765	1.038	0.825	0.795	1	1	1	1	1	1	109.4	101.5	105.3	83.8	3.92	4.16	1.31	6.16	High	High	High	High	High	High	High	High	High	High	High	High
FALSE	High	Master Protein	Dlo_pri0678F.1_g00110.1	Dlo_pri0678F.1_g00110.1	0	21.072	17	4	10	4	323	36.7	5.63	212	4	0	0	1.018	0.804	0.922	0.79	0.906	1.147	1	1	1	1	1	1	106.8	108.8	85.9	98.5	1.44	2.27	6.57	3.08	High	High	High	High	High	High	High	High	High	High	High	High
FALSE	High	Master Protein	Dlo_pri0069F.1_g00490.1	Dlo_pri0069F.1_g00490.1	0	8.602	6	3	10	3	356	40.5	5.1	101	3	0	0	1.016	1.058	0.754	1.042	0.743	0.713	1	1	1	1	1	1	104.5	106.1	110.5	78.8	1.45	3.68	1.32	5.99	High	High	High	High	High	High	High	High	High	High	High	High
FALSE	High	Master Protein	Dlo_pri0342F.1_g01260.1	Dlo_pri0342F.1_g01260.1	0	28.008	11	5	10	5	651	72.9	7.5	244	5	0	0	1.045	0.981	1.441	0.939	1.379	1.468	1	1	1	1	1	1	89.5	93.6	87.9	129	3.08	2.96	0.96	3.3	High	High	High	High	High	High	High	High	High	High	High	High
FALSE	High	Master Protein	Dlo_pri0004F.1_g09330.1	Dlo_pri0004F.1_g09330.1	0	27.833	17	5	10	4	384	39.6	7.47	253	5	0	1	0.959	1.025	1.047	1.068	1.091	1.021	1	1	1	1	1	1	99.2	95.2	101.7	103.9	2.06	8.14	4.44	7.12	High	High	High	High	High	High	High	High	High	High	High	High
FALSE	High	Master Protein	Dlo_pri0846F.1_g00070.1	Dlo_pri0846F.1_g00070.1	0	15.94	14	3	10	1	315	34.2	5.86	251	3	0	0	0.922	0.81	0.596	0.879	0.646	0.735	1	1	1	1	1	1	120.2	110.8	97.4	71.6	2.4	3.28	4.5	2.98	High	High	High	High	High	High	High	High	High	High	High	High
FALSE	High	Master Protein	Dlo_pri0121F.1_g01750.1	Dlo_pri0121F.1_g01750.1	0	33.967	32	3	10	3	139	15.5	4.61	398	3	0	0	1.273	0.944	0.939	0.741	0.738	0.995	1	1	1	1	1	1	96.3	122.5	90.8	90.4	4.85	4.56	5.3	2.35	High	High	High	High	High	High	High	High	High	High	High	High
FALSE	High	Master Protein	Dlo_pri0117F.1_g01770.1	Dlo_pri0117F.1_g01770.1	0	23.949	13	5	10	3	476	55.3	5.57	277	5	0	2	0.78	1.103	0.842	1.414	1.079	0.763	1	1	1	1	1	1	107.4	83.8	118.4	90.4	0.63	0.58	1.16	1.55	High	Not Found	High	High	Not Found	High	High	Not Found	High	High	Not Found	High
FALSE	High	Master Protein	Dlo_pri0143F.1_g02760.1	Dlo_pri0143F.1_g02760.1	0	10.927	6	2	10	2	477	53.8	5.63	300	2	0	0	0.824	0.967	0.938	1.173	1.138	0.97	1	1	1	1	1	1	107.3	88.4	103.7	100.6	7.37	6.85	3.9	3.76	High	High	High	High	High	High	High	High	High	High	High	High
FALSE	High	Master Protein	Dlo_pri0685F.1_g00100.1	Dlo_pri0685F.1_g00100.1	0	8.023	7	2	10	1	271	30.4	8.21	181	2	0	0	1.05	0.98	1.142	0.934	1.088	1.165							95.9	100.7	94	109.5					Not Found	High	Not Found	Not Found	High	Not Found	Not Found	High	Not Found	Not Found	High	Not Found
FALSE	High	Master Protein	Dlo_pri0056F.1_g00300.1	Dlo_pri0056F.1_g00300.1	0	20.391	17	2	10	2	133	15.2	11.58	252	2	0	0	1.148	0.885	0.867	0.77	0.755	0.98	1	1	1	1	1	1	102.6	117.8	90.7	88.9	1.66	11.01	11.35	3.01	High	High	High	High	High	High	High	High	High	High	High	High
FALSE	High	Master Protein	Dlo_pri0024F.1_g00070.1	Dlo_pri0024F.1_g00070.1	0	16.361	12	3	10	3	186	19.4	7.56	223	3	0	0	1.032	1.499	0.868	1.452	0.841	0.579	1	1	1	1	1	1	90.9	93.8	136.3	79	7.28	1.88	5.91	3.32	High	High	High	High	High	High	High	High	High	High	High	High
FALSE	High	Master Protein	Dlo_pri0060F.1_g02300.1	Dlo_pri0060F.1_g02300.1	0	16.228	5	4	10	1	827	91.6	6.73	232	4	0	0	0.815	0.942	0.754	1.155	0.924	0.8	0.307029	1	0.201507	0.598546	1	0.238759	113.9	92.9	107.3	85.9	0.02	2.2	0.15	2.23	Not Found	High	High	Not Found	High	High	Not Found	High	High	Not Found	High	High
FALSE	High	Master Protein	Dlo_alt0117F-011-01.1_g00230.1	Dlo_alt0117F-011-01.1_g00230.1	0	13.79	27	4	10	3	158	18.6	5.2	133	4	0	1	0.78	1.068	0.866	1.37	1.111	0.811	1	1	1	1	1	1	107.7	84	115	93.3	3.34	4.49	4.45	3.02	High	High	High	High	High	High	High	High	High	High	High	High
FALSE	High	Master Protein	Dlo_pri0151F.1_g01230.1	Dlo_pri0151F.1_g01230.1	0	26.323	7	5	10	5	989	104.6	6.61	214	5	0	0	0.895	0.987	1.042	1.104	1.165	1.055	1	1	1	1	1	1	101.9	91.2	100.6	106.2	0.41	3.07	1.34	2.59	High	High	High	High	High	High	High	High	High	High	High	High
FALSE	High	Master Protein	Dlo_pri0008F.1_g03270.1	Dlo_pri0008F.1_g03270.1	0	23.585	14	5	10	5	472	50.7	9.55	324	5	0	0	0.493	0.745	0.718	1.511	1.456	0.963	1	1	1	1	1	1	135.3	66.7	100.8	97.1	3.89	10.84	4.84	2.47	High	High	High	High	High	High	High	High	High	High	High	High
FALSE	High	Master Protein	Dlo_pri0070F.1_g04170.1	Dlo_pri0070F.1_g04170.1	0	21.036	12	2	10	2	219	24.3	6.02	290	2	0	0	1.541	0.934	1.928	0.606	1.251	2.065	1	1	0.489618	0.956287	1	0.300673	74	114.1	69.1	142.7	3.47	1.69	0.97	0.39	High	High	High	High	High	High	High	High	High	High	High	High
FALSE	High	Master Protein	Dlo_pri0128F.1_g01950.1	Dlo_pri0128F.1_g01950.1	0	25.606	5	6	10	6	1554	169.3	6.76	184	6	0	0	0.984	0.977	0.937	0.993	0.952	0.959	1	1	1	1	1	1	102.6	101	100.3	96.1	1.01	2.33	1.09	1.07	High	High	High	High	High	High	High	High	High	High	High	High
FALSE	High	Master Protein	Dlo_alt0001F-010-01.1_g00070.1	Dlo_alt0001F-010-01.1_g00070.1	0	45.44	18	6	10	6	554	62.3	5.15	251	6	0	0	1.186	1.092	1.175	0.921	0.99	1.075	1	1	1	1	1	1	89.8	106.5	98.1	105.5	3.57	2.72	0.61	6.34	High	High	Not Found	High	High	Not Found	High	High	Not Found	High	High	Not Found
FALSE	High	Master Protein	Dlo_pri0070F.1_g01620.1	Dlo_pri0070F.1_g01620.1	0	19.049	11	2	10	2	230	25.7	5.2	346	2	0	0	1.005	1.111	1.092	1.106	1.087	0.983	1	1	1	1	1	1	95	95.5	105.6	103.8	2.08	4.22	6.81	4.67	High	High	High	High	High	High	High	High	High	High	High	High
FALSE	High	Master Protein	Dlo_alt0205F-009-01.1_g00040.1	Dlo_alt0205F-009-01.1_g00040.1	0	27.614	11	5	10	5	586	66.6	7.83	291	5	0	0	0.85	0.857	1.001	1.008	1.178	1.168	1	1	1	1	1	1	107.9	91.7	92.4	108	4.52	1.7	2.26	1.37	High	High	High	High	High	High	High	High	High	High	High	High
FALSE	High	Master Protein	Dlo_alt0190F-003-01.1_g00130.1	Dlo_alt0190F-003-01.1_g00130.1	0	14.523	7	4	10	4	566	64	5.73	233	4	0	0	0.82	1.017	0.881	1.241	1.074	0.866	1	1	1	1	1	1	107.6	88.2	109.4	94.8	10.02	9.45	1.32	3.83	High	High	High	High	High	High	High	High	High	High	High	High
FALSE	High	Master Protein	Dlo_pri0056F.1_g03820.1	Dlo_pri0056F.1_g03820.1	0	24.705	8	5	10	4	583	63.9	8.38	252	5	0	0	0.901	0.919	1.868	1.02	2.074	2.034	1	1	1	1	1	1	85.3	76.9	78.4	159.4	1.55	2.82	6.21	2.75	High	High	High	High	High	High	High	High	High	High	High	High
FALSE	High	Master Protein	Dlo_pri0731F.1_g00160.1	Dlo_pri0731F.1_g00160.1	0	12.56	7	2	10	2	425	45.8	9.66	319	2	0	0	1.02	1.031	1.005	1.011	0.985	0.974	1	1	1	1	1	1	98.6	100.6	101.7	99.1	1.03	1.97	1.69	1.98	High	High	High	High	High	High	High	High	High	High	High	High
FALSE	High	Master Protein	Dlo_pri0567F.1_g00530.1	Dlo_pri0567F.1_g00530.1	0	27.383	7	6	10	6	1075	120	7.36	241	6	0	0	0.892	1.061	0.986	1.188	1.104	0.929	1	1	1	1	1	1	101.6	90.6	107.7	100.1	4.21	4.88	3	3.01	High	High	High	High	High	High	High	High	High	High	High	High
FALSE	High	Master Protein	Dlo_pri0039F.1_g04160.1	Dlo_pri0039F.1_g04160.1	0	23.147	15	4	10	3	390	41.2	8.54	242	4	0	1	0.916	1.112	0.855	1.213	0.933	0.769	1	1	1	1	1	1	103	94.4	114.5	88.1	4.1	5.25	3.19	5.39	High	High	High	High	High	High	High	High	High	High	High	High
FALSE	High	Master Protein	Dlo_pri0024F.1_g01460.1	Dlo_pri0024F.1_g01460.1	0	25.182	9	5	10	5	675	76.1	5.12	264	5	0	0	1.154	1.057	1.073	0.916	0.93	1.015	1	1	1	1	1	1	93.4	107.7	98.7	100.2	4.8	3.88	2.03	1.18	High	High	High	High	High	High	High	High	High	High	High	High
FALSE	High	Master Protein	Dlo_pri0004F.1_g09920.1	Dlo_pri0004F.1_g09920.1	0	18.054	42	4	10	4	106	11.9	7.12	186	4	0	0	0.801	0.874	0.656	1.092	0.819	0.75	1	1	1	1	1	1	120.1	96.2	105	78.8	1.86	2.03	4.29	4.84	High	High	High	High	High	High	High	High	High	High	High	High
FALSE	High	Master Protein	Dlo_alt0007F-017-01.1_g00390.1	Dlo_alt0007F-017-01.1_g00390.1	0	19.175	12	4	10	4	342	37.5	7.24	227	4	0	0	1.391	2.025	1.064	1.456	0.765	0.525	1	1	1	1	1	1	73	101.5	147.8	77.7	2.43	2.2	2.81	3.69	High	High	High	High	High	High	High	High	High	High	High	High
FALSE	High	Master Protein	Dlo_pri0050F.1_g01000.1	Dlo_pri0050F.1_g01000.1	0	20.94	9	4	10	4	513	57.4	7.93	227	4	0	0	0.706	0.885	0.744	1.254	1.054	0.841	1	1	1	1	1	1	119.9	84.7	106.2	89.2	3.57	4.14	3.6	3.21	High	High	High	High	High	High	High	High	High	High	High	High
FALSE	High	Master Protein	Dlo_pri0064F.1_g02220.1	Dlo_pri0064F.1_g02220.1	0	16.826	8	3	10	3	404	44.9	9.47	350	3	0	0	0.914	1.066	0.976	1.167	1.069	0.916	1	1	1	1	1	1	101.1	92.4	107.8	98.7	1.24	6.35	2.79	7.42	High	High	High	High	High	High	High	High	High	High	High	High
FALSE	High	Master Protein	Dlo_pri0009F.1_g02370.1	Dlo_pri0009F.1_g02370.1	0	16.915	44	3	10	3	86	9.6	8.75	288	3	0	0	1.16	0.897	1.034	0.774	0.892	1.153	1	1	1	1	1	1	97.8	113.4	87.7	101.1	0.67	4.38	5.86	1.32	High	High	High	High	High	High	High	High	High	High	High	High
FALSE	High	Master Protein	Dlo_pri0023F.1_g05450.1	Dlo_pri0023F.1_g05450.1	0	30.146	12	3	10	1	375	41.8	9.17	296	3	0	0	0.925	1.026	0.765	1.109	0.827	0.745	1	1	1	1	1	1	107.7	99.6	110.4	82.3	3.74	4.52	2.95	3.38	High	High	Not Found	High	High	Not Found	High	High	Not Found	High	High	Not Found
FALSE	High	Master Protein	Dlo_pri0016F.1_g06360.1	Dlo_pri0016F.1_g06360.1	0	12.665	10	4	10	4	435	46.9	9.45	216	4	0	0	1.014	0.983	1.125	0.97	1.11	1.144	1	1	1	1	1	1	97	98.4	95.4	109.2	3.45	3.03	2.19	2.94	High	High	High	High	High	High	High	High	High	High	High	High
FALSE	High	Master Protein	Dlo_pri0010F.1_g05490.1	Dlo_pri0010F.1_g05490.1	0	17.221	19	3	10	2	159	17.8	10.32	280	3	0	1	1.18	1.027	1.097	0.87	0.93	1.068	1	1	1	1	1	1	92.9	109.7	95.5	101.9	2.17	4.94	1.33	4.08	High	High	High	High	High	High	High	High	High	High	High	High
FALSE	High	Master Protein	Dlo_pri0016F.1_g01770.1	Dlo_pri0016F.1_g01770.1	0	15.609	12	3	10	3	250	27.9	7.21	221	3	0	0	1.113	1.132	1.083	1.017	0.973	0.957	1	1	1	1	1	1	92.4	102.9	104.6	100.1	1.9	1.39	1.99	1.57	High	High	High	High	High	High	High	High	High	High	High	High
FALSE	High	Master Protein	Dlo_pri0913F.1_g00230.1	Dlo_pri0913F.1_g00230.1	0	21.086	21	3	10	3	203	22.3	7.11	270	3	0	0	0.924	0.911	1.165	0.986	1.261	1.279	1	1	1	1	1	1	100	92.4	91.1	116.5	1.39	0.76	4.88	2.53	High	High	High	High	High	High	High	High	High	High	High	High
FALSE	High	Master Protein	Dlo_pri0159F.1_g00420.1	Dlo_pri0159F.1_g00420.1	0	26.267	14	5	10	5	407	45.5	5.35	269	5	0	0	1.002	0.92	0.982	0.918	0.98	1.067	1	1	1	1	1	1	102.5	102.6	94.3	100.6	1.53	3.54	3.55	1.23	High	High	High	High	High	High	High	High	High	High	High	High
FALSE	High	Master Protein	Dlo_alt0097F-011-01.1_g00010.1	Dlo_alt0097F-011-01.1_g00010.1	0	17.251	14	4	10	1	308	34.3	11.28	216	4	0	3	1.156	0.961	0.97	0.831	0.839	1.01	1	1	1	1	1	1	97.9	113.2	94	94.9	2.26	1.18	0.52	0.78	High	High	High	High	High	High	High	High	High	High	High	High
FALSE	High	Master Protein	Dlo_pri0041F.1_g04070.1	Dlo_pri0041F.1_g04070.1	0	22.508	22	5	10	4	288	31.5	7.42	192	5	0	1	0.633	0.707	0.815	1.117	1.288	1.153	0.783208	1	1	1	1	1	126.8	80.3	89.6	103.3	2.97	0.42	6.8	3.19	High	High	High	High	High	High	High	High	High	High	High	High
FALSE	High	Master Protein	Dlo_pri0174F.1_g00690.1	Dlo_pri0174F.1_g00690.1	0	20.939	32	3	10	2	143	15.4	11.34	214	3	0	0	1.014	0.861	1.026	0.849	1.012	1.192	1	1	1	1	1	1	102.5	104	88.3	105.2	1.76	3.08	4.97	1.65	High	High	High	High	High	High	High	High	High	High	High	High
FALSE	High	Master Protein	Dlo_pri0035F.1_g03940.1	Dlo_pri0035F.1_g03940.1	0	14.086	23	4	10	2	183	20.3	7.37	178	4	0	0	1.108	0.968	0.981	0.874	0.886	1.014	1	1	1	1	1	1	98.6	109.2	95.4	96.7	6.5	0.85	6.4	13.85	High	Not Found	High	High	Not Found	High	High	Not Found	High	High	Not Found	High
FALSE	High	Master Protein	Dlo_pri0077F.1_g00980.1	Dlo_pri0077F.1_g00980.1	0	28.825	12	7	10	7	758	86.1	6.81	224	7	0	0	0.868	1.149	0.985	1.323	1.135	0.858	1	1	1	1	1	1	99.9	86.8	114.8	98.5	0.43	4.86	4.9	1.77	High	High	High	High	High	High	High	High	High	High	High	High
FALSE	High	Master Protein	Dlo_pri0295F.1_g00430.1	Dlo_pri0295F.1_g00430.1	0	23.235	5	6	10	6	1292	141.4	6.55	246	6	0	0	0.863	1.111	0.935	1.287	1.084	0.842	1	1	1	1	1	1	102.3	88.3	113.7	95.7	2.05	10.02	7.6	2.77	High	High	High	High	High	High	High	High	High	High	High	High
FALSE	High	Master Protein	Dlo_pri0074F.1_g03070.1	Dlo_pri0074F.1_g03070.1	0	11.604	18	4	10	1	207	23.8	11.02	177	4	0	0	1.239	1.261	1.121	1.018	0.905	0.89							86.6	107.2	109.1	97.1					Not Found	High	Not Found	Not Found	High	Not Found	Not Found	High	Not Found	Not Found	High	Not Found
FALSE	High	Master Protein	Dlo_pri0320F.1_g00280.1	Dlo_pri0320F.1_g00280.1	0	10.12	11	3	10	1	260	28.5	8.63	200	3	0	0	1.163	0.986	1.123	0.847	0.965	1.139							93.6	108.9	92.3	105.1					Not Found	High	Not Found	Not Found	High	Not Found	Not Found	High	Not Found	Not Found	High	Not Found
FALSE	High	Master Protein	Dlo_pri0004F.1_g04280.1	Dlo_pri0004F.1_g04280.1	0	23.471	4	4	10	3	1513	168.9	7.44	242	4	0	1	1.117	1.288	1.171	1.153	1.048	0.909	1	1	1	1	1	1	87.4	97.7	112.6	102.3	6.01	3.47	6.23	1.99	High	High	Not Found	High	High	Not Found	High	High	Not Found	High	High	Not Found
FALSE	High	Master Protein	Dlo_pri0198F.1_g00460.1	Dlo_pri0198F.1_g00460.1	0	28.317	9	4	10	4	774	84	6.06	375	4	0	0	1.111	1.159	0.955	1.043	0.86	0.824	1	1	1	1	1	0.707976	94.7	105.2	109.7	90.5	1.25	2.95	2.62	1.71	High	High	High	High	High	High	High	High	High	High	High	High
FALSE	High	Master Protein	Dlo_pri0328F.1_g01190.1	Dlo_pri0328F.1_g01190.1	0	27.582	20	5	10	5	348	36.5	5.77	316	5	0	0	1.063	1.15	0.919	1.082	0.865	0.799	1	1	1	1	1	1	96.8	102.9	111.3	89	3.18	5.1	3.65	10.01	High	High	High	High	High	High	High	High	High	High	High	High
FALSE	High	Master Protein	Dlo_pri1315F.1_g00100.1	Dlo_pri1315F.1_g00100.1	0	34.421	22	6	10	6	405	42.9	9.66	239	6	0	0	1.078	0.937	1.051	0.869	0.975	1.122	1	1	1	1	1	1	98.4	106	92.2	103.4	9.22	5.17	3.71	6.43	High	High	High	High	High	High	High	High	High	High	High	High
FALSE	High	Master Protein	Dlo_alt0128F-006-01.1_g00030.1	Dlo_alt0128F-006-01.1_g00030.1	0	24.527	18	4	10	4	361	39.5	7.8	321	4	0	0	1.158	0.885	1.28	0.764	1.105	1.446	1	1	1	1	1	1	92.5	107.1	81.9	118.4	3.87	5.1	8.86	2.2	High	High	High	High	High	High	High	High	High	High	High	High
FALSE	High	Master Protein	Dlo_pri0218F.1_g01320.1	Dlo_pri0218F.1_g01320.1	0	25.39	15	4	10	4	386	43	5.4	217	4	0	0	0.656	1.084	0.676	1.652	1.03	0.624	0.217249	1	0.289703	0.0816903	1	0.12551	117.1	76.8	126.9	79.2	4.71	2.91	4.43	3.18	High	High	High	High	High	High	High	High	High	High	High	High
FALSE	High	Master Protein	Dlo_pri0200F.1_g02080.1	Dlo_pri0200F.1_g02080.1	0	17.051	10	4	10	4	595	66.5	6.33	228	4	0	0	0.941	0.981	0.827	1.042	0.879	0.843	1	1	1	1	1	1	106.7	100.4	104.7	88.2	0.87	0.24	1.08	0.05	High	High	High	High	High	High	Not Found	High	High	Not Found	High	High
FALSE	High	Master Protein	Dlo_pri0074F.1_g02120.1	Dlo_pri0074F.1_g02120.1	0	18.981	22	3	10	3	157	17.4	5.94	286	3	0	0	0.853	0.61	0.551	0.716	0.646	0.902	1	1	1	1	1	1	132.7	113.2	81	73.1	4.92	5.8	6.71	8.56	High	High	High	High	High	High	High	High	High	High	High	High
FALSE	High	Master Protein	Dlo_pri0004F.1_g00830.1	Dlo_pri0004F.1_g00830.1	0	24.14	11	4	10	4	520	56.6	7.08	258	4	0	0	1.15	0.807	0.771	0.702	0.671	0.955	1	1	1	1	1	1	107.3	123.4	86.6	82.7	0.15	2.04	2.36	2.59	High	High	High	High	High	High	High	High	High	High	High	High
FALSE	High	Master Protein	Dlo_pri0108F.1_g02320.1	Dlo_pri0108F.1_g02320.1	0	27.291	19	5	10	5	323	36.3	4.82	258	5	0	0	0.956	0.996	0.928	1.042	0.97	0.931	1	1	1	1	1	1	103.1	98.6	102.7	95.6	2.62	9.92	10.05	2.5	High	High	High	High	High	High	High	High	High	High	High	High
FALSE	High	Master Protein	Dlo_pri0040F.1_g03470.1	Dlo_pri0040F.1_g03470.1	0	21.947	12	3	10	1	372	40.8	6.15	277	3	0	0	1.786	1.035	1.624	0.58	0.909	1.568	1	1	1	1	1	1	73.5	131.2	76.1	119.3	17.04	5.23	17	15.64	High	High	Not Found	High	High	Not Found	High	High	Not Found	High	High	Not Found
FALSE	High	Master Protein	Dlo_pri0001F.1_g06270.1	Dlo_pri0001F.1_g06270.1	0	21.12	8	6	10	6	997	113	5.22	244	6	0	0	0.899	1.087	0.846	1.209	0.941	0.779	1	1	1	1	1	1	104.4	93.8	113.4	88.3	5.29	6.41	3.96	1.3	High	High	High	High	High	High	High	High	High	High	High	High
FALSE	High	Master Protein	Dlo_pri0037F.1_g00850.1	Dlo_pri0037F.1_g00850.1	0	19.115	31	5	10	5	169	18.7	7.08	220	5	0	0	0.651	1.126	0.493	1.728	0.756	0.438	1	1	1	1	1	1	122.3	79.7	137.7	60.3	0.49	2.58	1.8	4.04	High	High	High	High	High	High	High	High	High	High	High	High
FALSE	High	Master Protein	Dlo_pri1034F.1_g00040.1	Dlo_pri1034F.1_g00040.1	0	21.789	8	4	10	4	583	66.9	8.47	212	4	0	0	0.893	1.031	0.936	1.154	1.048	0.908	1	1	1	1	1	1	103.6	92.5	106.8	97	1.02	1.7	1.4	1.1	High	High	High	High	High	High	High	High	High	High	High	High
FALSE	High	Master Protein	Dlo_pri0074F.1_g03770.1	Dlo_pri0074F.1_g03770.1	0	23.745	15	4	10	4	337	35.2	4.78	320	4	0	0	0.767	0.929	0.78	1.211	1.016	0.839	1	1	1	1	1	1	115	88.3	106.9	89.7	1.69	3.2	2.87	2.63	High	High	High	High	High	High	High	High	High	High	High	High
FALSE	High	Master Protein	Dlo_pri0287F.1_g00060.1	Dlo_pri0287F.1_g00060.1	0	18.152	34	3	10	2	141	16.1	7.83	234	3	0	0	0.9	1.025	0.912	1.138	1.013	0.89	1	1	1	1	1	1	104.2	93.9	106.8	95.1	1.44	2.69	4.51	4.19	High	High	High	High	High	High	High	High	High	High	High	High
FALSE	High	Master Protein	Dlo_pri0053F.1_g02540.1	Dlo_pri0053F.1_g02540.1	0	30.128	21	4	10	4	348	37.6	5.47	335	4	0	0	0.952	1.364	0.834	1.432	0.876	0.612	1	1	1	1	1	1	96.4	91.8	131.4	80.4	2.47	2.86	4.81	3.09	High	High	High	High	High	High	High	High	High	High	High	High
FALSE	High	Master Protein	Dlo_pri0067F.1_g01420.1	Dlo_pri0067F.1_g01420.1	0	25.506	8	4	10	4	706	79.8	7.44	316	4	0	0	1.112	1.326	1.06	1.193	0.954	0.799	1	1	1	1	1	1	88.9	98.9	117.9	94.3	3.95	0.69	1.34	1.37	High	High	High	High	High	High	High	High	High	High	High	High
FALSE	High	Master Protein	Dlo_pri0265F.1_g01270.1	Dlo_pri0265F.1_g01270.1	0	32.833	30	5	10	5	291	33.3	5.12	289	5	0	0	0.855	1.024	0.901	1.198	1.054	0.88	1	1	1	1	1	1	105.8	90.5	108.4	95.4	2.55	5.57	4.8	6.51	High	High	High	High	High	High	High	High	High	High	High	High
FALSE	High	Master Protein	Dlo_pri0000F.1_g02870.1	Dlo_pri0000F.1_g02870.1	0	14.518	25	3	10	2	146	16.7	10.81	251	3	0	1	0.809	0.957	0.912	1.183	1.128	0.953	1	1	1	1	1	1	108.7	88	104.1	99.2	2.76	4.27	5.77	0.46	High	High	High	High	High	High	High	High	High	High	High	High
FALSE	High	Master Protein	Dlo_pri0038F.1_g03740.1	Dlo_pri0038F.1_g03740.1	0	32.656	31	4	10	4	156	16.6	8.98	264	4	0	0	1.213	1.167	1.173	0.962	0.967	1.005	1	1	1	1	1	1	87.9	106.6	102.6	103	3.72	6.04	4.48	1.93	High	High	High	High	High	High	High	High	High	High	High	High
FALSE	High	Master Protein	Dlo_pri0001F.1_g07730.1	Dlo_pri0001F.1_g07730.1	0	11.045	23	3	10	3	120	13.7	11.68	233	3	0	0	0.96	1.039	0.872	1.082	0.908	0.84	1	1	1	1	1	1	103.3	99.2	107.3	90.1	0.87	3.48	1.28	2.55	High	High	High	High	High	High	High	High	High	High	High	High
FALSE	High	Master Protein	Dlo_alt0411F-004-01.1_g00050.1	Dlo_alt0411F-004-01.1_g00050.1	0	26.416	11	5	10	5	547	61.2	9.86	248	5	0	0	0.942	0.975	0.882	1.035	0.936	0.904	1	1	1	1	1	1	105.3	99.2	102.7	92.9	1.51	4.74	7.69	5.02	High	High	High	High	High	High	High	High	High	High	High	High
FALSE	High	Master Protein	Dlo_pri0015F.1_g02370.1	Dlo_pri0015F.1_g02370.1	0	23.631	12	7	10	7	520	61	6.1	197	7	0	0	0.885	1.013	0.978	1.145	1.105	0.965	1	1	1	1	1	1	103.2	91.3	104.6	100.9	4.71	3.64	2.63	1.86	High	High	High	High	High	High	High	High	High	High	High	High
FALSE	High	Master Protein	Dlo_pri0088F.1_g03290.1	Dlo_pri0088F.1_g03290.1	0	17.282	2	3	10	1	1479	167.7	8	265	3	0	0	2.142	1.343	1.008	0.627	0.471	0.751	1	1	1	1	1	1	72.8	156	97.8	73.4	5.91	2.73	4.82	5.25	High	Not Found	High	High	Not Found	High	High	Not Found	High	High	Not Found	High
FALSE	High	Master Protein	Dlo_pri0538F.1_g00230.1	Dlo_pri0538F.1_g00230.1	0	9.02	17	3	10	3	145	16.6	4.97	195	3	0	0	0.918	1.088	1.037	1.185	1.129	0.953	1	1	1	1	1	1	98.9	90.8	107.7	102.6	1.15	1.37	2.96	5.1	High	High	High	High	High	High	High	High	High	High	High	High
FALSE	High	Master Protein	Dlo_pri2248F.1_g00030.1	Dlo_pri2248F.1_g00030.1	0	16.392	11	2	10	1	229	25	9.17	248	2	0	0	1.387	0.942	1.311	0.68	0.945	1.391	1	1	1	1	1	1	86.2	119.5	81.2	113	4.33	5.38	7.04	2.68	Not Found	High	High	Not Found	High	High	Not Found	High	High	Not Found	High	High
FALSE	High	Master Protein	Dlo_pri0402F.1_g00880.1	Dlo_pri0402F.1_g00880.1	0	35.647	18	5	10	5	447	47.6	6.23	350	5	0	0	0.945	0.936	0.957	0.99	1.012	1.023	1	1	1	1	1	1	104.2	98.5	97.5	99.7	6.47	7.41	3.73	7.68	High	High	High	High	High	High	High	High	High	High	High	High
FALSE	High	Master Protein	Dlo_pri0074F.1_g00770.1	Dlo_pri0074F.1_g00770.1	0	20.206	25	6	10	6	271	29.9	5.97	207	6	0	0	1.273	1.077	1.055	0.846	0.829	0.979	1	1	1	1	1	1	90.8	115.6	97.8	95.8	2.08	0.77	6.25	4.06	High	High	High	High	High	High	High	High	High	High	High	High
FALSE	High	Master Protein	Dlo_pri0312F.1_g01230.1	Dlo_pri0312F.1_g01230.1	0	25.128	28	4	10	2	184	19.3	4.73	308	4	0	2	1.389	1.054	1.001	0.759	0.721	0.951	1	1	1	1	1	1	90	125	94.8	90.1	2.11	2.76	1.45	0.89	High	High	High	High	High	High	High	High	High	High	High	High
FALSE	High	Master Protein	Dlo_pri0001F.1_g05040.1	Dlo_pri0001F.1_g05040.1	0	19.38	5	5	9	5	979	110.5	7.75	202	5	0	0	0.986	0.854	0.884	0.866	0.897	1.035	1	1	1	1	1	1	107.4	105.9	91.7	95	14.95	16.55	3.42	5.59	High	High	High	High	High	High	High	High	High	High	High	High
FALSE	High	Master Protein	Dlo_pri0000F.1_g00800.1	Dlo_pri0000F.1_g00800.1	0	22.025	9	4	9	3	540	60	8.88	216	4	0	0	0.925	0.758	1.473	0.82	1.593	1.942	1	1	1	1	1	1	96.2	89	73	141.8	4.09	11.82	1.6	4.84	High	High	High	High	High	High	High	High	High	High	High	High
FALSE	High	Master Protein	Dlo_pri0999F.1_g00150.1	Dlo_pri0999F.1_g00150.1	0	26.851	13	5	9	5	508	55.2	6.42	327	5	0	0	0.904	0.921	0.919	1.018	1.017	0.998	1	1	1	1	1	1	106.8	96.6	98.4	98.2	0.74	15.11	9.29	3.95	High	High	High	High	High	High	High	High	High	High	High	High
FALSE	High	Master Protein	Dlo_alt0173F-004-01.1_g00030.1	Dlo_alt0173F-004-01.1_g00030.1	0	18.24	9	3	9	3	438	48	6	284	3	0	0	0.7	0.937	0.707	1.34	1.01	0.754	1	1	1	1	1	1	119.6	83.7	112.2	84.5	1.46	1.18	2.76	2.88	High	High	High	High	High	High	High	High	High	High	High	High
FALSE	High	Master Protein	Dlo_pri0024F.1_g00790.1	Dlo_pri0024F.1_g00790.1	0	12.547	6	3	9	2	565	62.8	5.76	234	3	0	0	0.961	1.069	0.871	1.112	0.907	0.815	1	1	1	1	1	1	102.5	98.5	109.6	89.3	0.33	0.97	1	0.51	High	High	High	High	High	High	High	High	High	High	High	High
FALSE	High	Master Protein	Dlo_pri0041F.1_g02650.1	Dlo_pri0041F.1_g02650.1	0	26.477	29	5	9	5	274	30.8	7.5	236	5	0	0	0.849	1.044	0.963	1.23	1.135	0.923	1	1	1	1	1	1	103.7	88	108.3	99.9	3.47	5.9	5.28	4.85	High	High	High	High	High	High	High	High	High	High	High	High
FALSE	High	Master Protein	Dlo_pri0053F.1_g02140.1	Dlo_pri0053F.1_g02140.1	0	25.359	13	5	9	5	593	65.1	5.5	193	5	0	0	1.003	1.116	0.963	1.112	0.96	0.863	1	1	1	1	1	1	98	98.3	109.3	94.4	5.18	6.69	6.83	3.47	High	High	High	High	High	High	High	High	High	High	High	High
FALSE	High	Master Protein	Dlo_pri0031F.1_g02190.1	Dlo_pri0031F.1_g02190.1	0	17.485	13	4	9	4	329	36.8	5.66	193	4	0	0	0.961	1.114	0.882	1.159	0.918	0.792	1	1	1	0.983201	1	0.234094	101.1	97.2	112.6	89.2	4.1	1.52	2.6	2.59	High	High	High	High	High	High	High	High	High	High	High	High
FALSE	High	Master Protein	Dlo_pri1141F.1_g00150.1	Dlo_pri1141F.1_g00150.1	0	24.52	6	3	9	2	592	63.8	5.64	186	3	0	0	1.593	1.088	1.005	0.683	0.631	0.924	1	1	1	1	1	1	85.4	136	92.8	85.8	16.4	3.55	17.62	8.39	High	Not Found	High	High	Not Found	High	High	Not Found	High	High	Not Found	High
FALSE	High	Master Protein	Dlo_pri0209F.1_g01980.1	Dlo_pri0209F.1_g01980.1	0	15.762	20	4	9	4	212	22	6.33	363	4	0	0	1.491	1.012	1.241	0.679	0.832	1.226	1	1	1	1	1	1	84.3	125.7	85.3	104.6	0.71	0.84	1.56	0.37	High	High	High	High	High	High	High	High	High	High	High	High
FALSE	High	Master Protein	Dlo_alt0016F-014-01.1_g00030.1	Dlo_alt0016F-014-01.1_g00030.1	0	21.576	18	6	9	6	302	32.1	4.92	166	6	0	0	0.885	1.208	0.961	1.366	1.087	0.796	1	1	1	1	1	1	98.7	87.3	119.2	94.9	4.57	3.73	4.06	3.32	High	High	High	High	High	High	High	High	High	High	High	High
FALSE	High	Master Protein	Dlo_alt0074F-004-01.1_g00040.1	Dlo_alt0074F-004-01.1_g00040.1	0	24.66	11	4	9	4	445	47.8	5.45	256	4	0	0	0.826	0.935	0.773	1.132	0.935	0.826	1	1	1	1	1	1	113.2	93.5	105.8	87.5	2.36	1.65	2.66	1.28	High	High	High	High	High	High	High	High	High	High	High	High
FALSE	High	Master Protein	Dlo_pri1141F.1_g00030.1	Dlo_pri1141F.1_g00030.1	0	14.751	10	4	9	1	507	55.3	5.1	172	4	0	0																					Not Found	Not Found	High	Not Found	Not Found	High	Not Found	Not Found	High	Not Found	Not Found	High
FALSE	High	Master Protein	Dlo_pri0369F.1_g00510.1	Dlo_pri0369F.1_g00510.1	0	24.067	14	5	9	5	412	48.2	6.25	223	5	0	0	1.091	0.983	1.058	0.9	0.969	1.076	1	1	1	1	1	1	96.8	105.6	95.1	102.4	2.78	2.3	5.34	4.83	High	High	High	High	High	High	High	High	High	High	High	High
FALSE	High	Master Protein	Dlo_pri0149F.1_g00070.1	Dlo_pri0149F.1_g00070.1	0	24.753	16	5	9	4	330	37.4	7.44	221	5	0	1	0.969	0.994	1.055	1.025	1.089	1.062	1	1	1	1	1	1	99.5	96.5	98.9	105	0.46	5.52	6.15	0.99	High	High	High	High	High	High	High	High	High	High	High	High
FALSE	High	Master Protein	Dlo_pri0419F.1_g01510.1	Dlo_pri0419F.1_g01510.1	0	23.946	24	5	9	5	320	34.2	8.85	253	5	0	0	1.397	1.116	1.255	0.799	0.899	1.125	1	1	1	1	1	1	83.9	117.2	93.6	105.3	8.7	9.27	22.94	14.58	High	High	High	High	High	High	High	High	High	High	High	High
FALSE	High	Master Protein	Dlo_pri0383F.1_g00630.1	Dlo_pri0383F.1_g00630.1	0	20.336	12	5	9	5	465	51.2	6.46	233	5	0	0	1.193	0.917	1.089	0.769	0.913	1.188	1	1	1	1	1	1	95.3	113.7	87.3	103.7	2.04	4.32	2.38	3.47	High	High	High	High	High	High	High	High	High	High	High	High
FALSE	High	Master Protein	Dlo_pri0589F.1_g00610.1	Dlo_pri0589F.1_g00610.1	0	9.026	21	2	9	2	91	10.6	8.38	259	2	0	0	0.754	0.947	1.046	1.256	1.388	1.105	0.140684	1	1	0.241237	0.0725988	1	106.7	80.5	101.1	111.7	0.91	1.66	2.99	0.66	High	High	High	High	High	High	High	High	High	High	High	High
FALSE	High	Master Protein	Dlo_pri0001F.1_g11600.1	Dlo_pri0001F.1_g11600.1	0	16.729	54	3	9	3	68	7.7	7.12	220	3	0	0	1.115	0.831	1.023	0.746	0.918	1.231	1	1	1	1	1	1	100.8	112.3	83.8	103.1	1.61	1.06	1.26	1.75	High	High	High	High	High	High	High	High	High	High	High	High
FALSE	High	Master Protein	Dlo_alt0092F-019-01.1_g00030.1	Dlo_alt0092F-019-01.1_g00030.1	0	10.886	6	3	9	3	525	57.6	9.09	192	3	0	0	0.653	0.849	0.886	1.299	1.356	1.044	0.816893	1	1	1	1	1	118.1	77.1	100.2	104.6	4.77	10.67	4.43	6.24	High	High	High	High	High	High	High	High	High	High	High	High
FALSE	High	Master Protein	Dlo_pri0082F.1_g01050.1	Dlo_pri0082F.1_g01050.1	0	28.442	18	3	9	3	267	29.6	5.97	359	3	0	0	1.911	1.403	1.303	0.734	0.682	0.929	0.19107	1	1	1	1	1	71.2	136.1	99.9	92.8	3.13	2.59	1.7	1.08	High	High	High	High	High	High	High	High	High	High	High	High
FALSE	High	Master Protein	Dlo_pri0065F.1_g02250.1	Dlo_pri0065F.1_g02250.1	0	23.94	13	4	9	1	448	49.5	9.19	246	4	0	0	4.134	2.982	2.279	0.721	0.551	0.764							38.5	159.1	114.7	87.7					High	Not Found	Not Found	High	Not Found	Not Found	High	Not Found	Not Found	High	Not Found	Not Found
FALSE	High	Master Protein	Dlo_pri0000F.1_g02740.1	Dlo_pri0000F.1_g02740.1	0	28.904	8	6	9	6	980	106.3	5.57	220	6	0	0	1.102	1.059	1.076	0.961	0.976	1.016	1	1	1	1	1	1	94.4	104.1	100	101.6	3.96	8.55	5.21	4.05	High	High	High	High	High	High	High	High	High	High	High	High
FALSE	High	Master Protein	Dlo_alt0193F-002-01.1_g00080.1	Dlo_alt0193F-002-01.1_g00080.1	0	19.531	37	5	9	5	110	12.3	5.5	180	5	0	0	1.198	0.95	0.816	0.793	0.681	0.858	1	1	1	1	1	1	100.9	120.9	95.9	82.3	1.12	1.7	3.16	2.08	High	High	High	High	High	High	High	High	High	High	High	High
FALSE	High	Master Protein	Dlo_pri0015F.1_g04250.1	Dlo_pri0015F.1_g04250.1	0	24.503	10	6	9	6	809	91.4	6.74	270	6	0	0	0.87	0.972	0.939	1.118	1.079	0.966	1	1	1	1	1	1	105.8	92	102.9	99.3	4.32	0.97	5.36	1.94	High	High	High	High	High	High	High	High	High	High	High	High
FALSE	High	Master Protein	Dlo_pri0046F.1_g01790.1	Dlo_pri0046F.1_g01790.1	0	20.443	14	3	9	3	278	31	5.59	339	3	0	0	1.036	0.955	0.904	0.922	0.873	0.947	1	1	1	1	1	1	102.7	106.4	98.1	92.8	3.88	4.12	5.1	3.31	High	High	High	High	High	High	High	High	High	High	High	High
FALSE	High	Master Protein	Dlo_pri0209F.1_g00470.1	Dlo_pri0209F.1_g00470.1	0	17.094	24	3	9	3	180	19.8	5.14	199	3	0	0	1.058	1.047	0.996	0.989	0.941	0.951	1	1	1	1	1	1	97.6	103.2	102.1	97.1	0.19	2.49	2.21	1.01	High	High	High	High	High	High	High	High	High	High	High	High
FALSE	High	Master Protein	Dlo_pri1349F.1_g00040.1	Dlo_pri1349F.1_g00040.1	0	7.818	10	3	9	2	260	27.9	9.23	130	3	0	0	1.186	1.042	1.346	0.878	1.135	1.292	1	1	1	1	1	1	87.5	103.7	91.1	117.7	5.3	7.13	2.42	8.35	High	Not Found	High	High	Not Found	High	High	Not Found	High	High	Not Found	High
FALSE	High	Master Protein	Dlo_pri0101F.1_g01860.1	Dlo_pri0101F.1_g01860.1	0	18.903	16	2	9	2	209	21.6	5.9	297	2	0	0	1.056	0.907	0.765	0.859	0.724	0.843	1	1	1	1	1	1	107.3	113.3	97.4	82	5.84	6.02	2.99	6.99	High	High	High	High	High	High	High	High	High	High	High	High
FALSE	High	Master Protein	Dlo_pri0046F.1_g03510.1	Dlo_pri0046F.1_g03510.1	0	35.717	11	4	9	4	526	57.7	7.49	275	4	0	0	1.107	0.929	0.983	0.839	0.888	1.058	1	1	1	1	1	1	99.5	110.2	92.5	97.8	21.99	25.57	12.79	11.2	High	High	High	High	High	High	High	High	High	High	High	High
FALSE	High	Master Protein	Dlo_pri0004F.1_g05050.1	Dlo_pri0004F.1_g05050.1	0	24.36	11	4	9	4	464	50.2	6.46	304	4	0	0	0.667	1.135	0.675	1.701	1.011	0.594	1	1	1	1	1	1	115.1	76.8	130.6	77.6	5.48	6.23	1.77	3.52	High	High	High	High	High	High	High	High	High	High	High	High
FALSE	High	Master Protein	Dlo_pri0097F.1_g01790.1	Dlo_pri0097F.1_g01790.1	0	10.013	26	2	9	2	84	9.4	4.63	221	2	0	0	0.953	1.047	0.939	1.099	0.986	0.897	1	1	1	1	1	1	101.6	96.8	106.3	95.4	2.3	2.06	1.26	0.49	High	High	High	High	High	High	High	High	High	High	High	High
FALSE	High	Master Protein	Dlo_pri0081F.1_g02450.1	Dlo_pri0081F.1_g02450.1	0	37.086	16	5	9	4	490	53.1	6.52	223	5	0	1	1.374	1.71	1.302	1.245	0.947	0.761	1	1	1	1	1	1	74.3	102	127	96.7	6.36	5.3	2.27	2.51	High	High	High	High	High	High	High	High	High	High	High	High
FALSE	High	Master Protein	Dlo_pri0038F.1_g04700.1	Dlo_pri0038F.1_g04700.1	0	21.868	18	4	9	2	219	24.6	8.87	182	4	0	0	0.8	0.738	0.793	0.923	0.992	1.075	1	1	1	1	1	1	120.1	96	88.6	95.3	20.71	7.64	4.53	14.38	High	High	Not Found	High	High	Not Found	High	High	Not Found	High	High	Not Found
FALSE	High	Master Protein	Dlo_alt0295F-006-01.1_g00020.1	Dlo_alt0295F-006-01.1_g00020.1	0	13.157	25	3	9	3	132	14.1	9.72	230	3	0	0	0.972	1.294	1.005	1.331	1.035	0.777	1	1	1	1	1	1	93.7	91	121.2	94.2	2.07	1.72	1.24	0.48	High	High	High	High	High	High	High	High	High	High	High	High
FALSE	High	Master Protein	Dlo_pri0141F.1_g00680.1	Dlo_pri0141F.1_g00680.1	0	10.299	23	2	9	2	88	9.5	8.59	207	2	0	0	1.345	1.574	0.878	1.17	0.653	0.558	1	1	1	1	1	1	83.4	112.1	131.2	73.2	4.48	1.36	10.35	15.2	High	High	High	High	High	High	High	High	High	High	High	High
FALSE	High	Master Protein	Dlo_pri0024F.1_g00110.1	Dlo_pri0024F.1_g00110.1	0	7.876	12	2	9	2	176	19.6	7.42	249	2	0	0	0.681	0.892	0.886	1.309	1.3	0.993	1	1	1	1	1	1	115.6	78.8	103.2	102.4	4.17	0.91	2.74	2.21	High	High	High	High	High	High	High	High	High	High	High	High
FALSE	High	Master Protein	Dlo_pri0018F.1_g05550.1	Dlo_pri0018F.1_g05550.1	0	28.778	14	6	9	5	540	59.6	6.15	274	6	0	1	0.927	0.91	0.965	0.982	1.042	1.061	1	1	1	1	1	1	105.2	97.5	95.7	101.6	1.59	4.76	6.56	6.11	High	High	High	High	High	High	High	High	High	High	High	High
FALSE	High	Master Protein	Dlo_pri0020F.1_g00910.1	Dlo_pri0020F.1_g00910.1	0	23.338	23	4	9	4	235	26	8.82	358	4	0	0	1.287	1.024	1.242	0.796	0.965	1.212	1	1	1	1	1	1	87.9	113.1	90	109.1	3.65	5.83	3.08	2.97	High	High	High	High	High	High	High	High	High	High	High	High
FALSE	High	Master Protein	Dlo_pri0159F.1_g00150.1	Dlo_pri0159F.1_g00150.1	0	16.097	6	3	9	3	591	64.4	8.51	232	3	0	0	0.832	1.073	0.985	1.29	1.184	0.918	1	1	1	1	1	1	102.8	85.5	110.3	101.3	2.72	2.75	2.19	2.03	High	High	High	High	High	High	High	High	High	High	High	High
FALSE	High	Master Protein	Dlo_pri0414F.1_g00290.1	Dlo_pri0414F.1_g00290.1	0	25.222	9	6	9	3	649	71.6	9.41	161	6	0	3	0.817	1.059	0.855	1.296	1.046	0.807	1	1	1	1	1	1	107.2	87.6	113.5	91.6	4.04	3.75	2.2	1.58	High	Not Found	High	High	Not Found	High	High	Not Found	High	High	Not Found	High
FALSE	High	Master Protein	Dlo_pri0236F.1_g01190.1	Dlo_pri0236F.1_g01190.1	0	18.116	5	4	9	1	916	101.5	5.59	211	4	0	3	0.793	1.005	0.876	1.267	1.104	0.871	1	1	1	1	1	1	108.9	86.3	109.4	95.3	1.68	2.23	0.28	0.35	High	High	Not Found	High	High	Not Found	High	High	Not Found	High	High	Not Found
FALSE	High	Master Protein	Dlo_pri0000F.1_g06200.1	Dlo_pri0000F.1_g06200.1	0	18.164	9	4	9	2	359	40.9	7.31	181	4	0	2	0.871	0.939	1.141	1.078	1.31	1.216	1	1	1	1	1	1	101.2	88.2	95	115.6	8.29	2.54	4.18	6.68	High	High	High	High	High	High	High	High	High	High	High	High
FALSE	High	Master Protein	Dlo_pri0187F.1_g00110.1	Dlo_pri0187F.1_g00110.1	0	17.979	12	4	9	4	510	56.5	5.63	201	4	0	0	1.029	0.926	0.92	0.9	0.894	0.994	1	1	1	1	1	1	103.2	106.2	95.6	95	0.14	5.28	10.11	5.03	High	High	High	High	High	High	High	High	High	High	High	High
FALSE	High	Master Protein	Dlo_pri0050F.1_g02530.1	Dlo_pri0050F.1_g02530.1	0	26.223	16	5	9	2	413	45.7	5.48	288	5	0	0	0.789	0.94	0.754	1.192	0.956	0.802							114.8	90.6	108	86.6					Not Found	High	Not Found	Not Found	High	Not Found	Not Found	High	Not Found	Not Found	High	Not Found
FALSE	High	Master Protein	Dlo_pri0426F.1_g00340.1	Dlo_pri0426F.1_g00340.1	0	20.322	20	4	9	4	268	30.2	9.47	219	4	0	0	1.173	1.097	1.05	0.936	0.895	0.957	1	1	1	1	1	1	92.6	108.6	101.6	97.2	2.71	1.86	1.04	1.8	High	High	High	High	High	High	High	High	High	High	High	High
FALSE	High	Master Protein	Dlo_pri0018F.1_g01940.1	Dlo_pri0018F.1_g01940.1	0	16.326	20	3	9	3	199	22.5	7.84	240	3	0	0	0.907	0.807	0.822	0.89	0.906	1.019	1	1	1	1	1	1	113.1	102.6	91.3	93	4.8	2.85	4.03	3.34	High	High	High	High	High	High	High	High	High	High	High	High
FALSE	High	Master Protein	Dlo_pri0241F.1_g01390.1	Dlo_pri0241F.1_g01390.1	0	16.054	5	4	9	1	840	92.3	7.02	200	4	0	3	0.784	0.997	0.861	1.272	1.098	0.864	1	1	1	1	1	1	109.8	86.1	109.5	94.6	1.47	1.08	1.74	1.03	High	Not Found	Not Found	High	Not Found	Not Found	High	Not Found	Not Found	High	Not Found	Not Found
FALSE	High	Master Protein	Dlo_pri0278F.1_g01080.1	Dlo_pri0278F.1_g01080.1	0	22.333	16	4	9	4	344	37	5.53	322	4	0	0	1.259	0.737	1.001	0.585	0.795	1.358	1	1	1	0.17396	1	1	100.1	126	73.7	100.2	1.12	2.54	4.64	0.98	High	High	High	High	High	High	High	High	High	High	High	High
FALSE	High	Master Protein	Dlo_pri0004F.1_g05330.1	Dlo_pri0004F.1_g05330.1	0	32.47	21	5	9	3	339	37.9	6.55	264	5	0	0	0.965	1.049	0.943	1.087	0.976	0.898	1	1	1	1	1	1	101.1	97.6	106.1	95.3	4.34	7.21	2.56	3.14	High	High	High	High	High	High	High	High	High	High	High	High
FALSE	High	Master Protein	Dlo_pri0094F.1_g00730.1	Dlo_pri0094F.1_g00730.1	0	23.738	27	4	9	4	210	23.3	5.85	284	4	0	0	0.557	1.039	0.539	1.866	0.968	0.519	1	1	1	1	1	1	127.6	71.1	132.6	68.8	2.15	14.78	9.23	6.17	High	High	High	High	High	High	High	High	High	High	High	High
FALSE	High	Master Protein	Dlo_pri0385F.1_g00460.1	Dlo_pri0385F.1_g00460.1	0	12.139	10	2	9	2	366	39.9	6.47	252	2	0	0	0.914	1.037	0.993	1.136	1.087	0.957	1	1	1	1	1	1	101.4	92.6	105.2	100.7	1.92	2.1	5.86	5.73	High	High	High	High	High	High	High	High	High	High	High	High
FALSE	High	Master Protein	Dlo_pri0038F.1_g03090.1	Dlo_pri0038F.1_g03090.1	0	13.401	4	4	9	4	1041	114.1	7.56	174	4	0	0	0.919	1.033	0.973	1.125	1.059	0.942	1	1	1	1	1	1	101.9	93.6	105.3	99.2	2.57	2.09	1.86	3.26	High	High	High	High	High	High	High	High	High	High	High	High
FALSE	High	Master Protein	Dlo_pri0001F.1_g12750.1	Dlo_pri0001F.1_g12750.1	0	33.885	20	3	9	3	239	26	5.41	370	3	0	0	0.956	1.024	0.942	1.071	0.986	0.921	1	1	1	1	1	1	102	97.5	104.4	96.1	0.67	2.97	1.32	2.84	High	High	High	High	High	High	High	High	High	High	High	High
FALSE	High	Master Protein	Dlo_pri0089F.1_g00040.1	Dlo_pri0089F.1_g00040.1	0	29.683	9	4	9	4	542	59.7	9.22	216	4	0	0	0.97	0.97	0.958	1	0.988	0.988	1	1	1	1	1	1	102.6	99.5	99.5	98.3	6.3	4.56	1.9	0.62	High	High	High	High	High	High	High	High	High	High	High	High
FALSE	High	Master Protein	Dlo_pri0057F.1_g02470.1	Dlo_pri0057F.1_g02470.1	0	28.537	46	4	9	4	153	17.3	7.34	274	4	0	0	0.966	0.958	0.906	0.992	0.938	0.946	1	1	1	1	1	1	104.4	100.9	100.1	94.6	0.83	3.69	5	2.49	High	High	High	High	High	High	High	High	High	High	High	High
FALSE	High	Master Protein	Dlo_pri0033F.1_g00470.1	Dlo_pri0033F.1_g00470.1	0	14.819	5	4	9	4	833	94.1	5.29	194	4	0	0	1.28	0.892	1.009	0.697	0.789	1.132	1	1	1	1	1	1	95.7	122.4	85.3	96.6	0.86	3.13	3.84	1.46	High	High	High	High	High	High	High	High	High	High	High	High
FALSE	High	Master Protein	Dlo_pri0064F.1_g01590.1	Dlo_pri0064F.1_g01590.1	0	6.351	10	2	9	2	164	18.8	10.65	98	2	0	0	1.137	1.004	1.052	0.883	0.925	1.048	1	1	1	1	1	1	95.4	108.5	95.8	100.4	3.4	1.38	2.68	3.26	High	High	High	High	High	High	High	High	High	High	High	High
FALSE	High	Master Protein	Dlo_pri0140F.1_g01220.1	Dlo_pri0140F.1_g01220.1	0	17.134	10	4	9	4	394	42.3	8.9	272	4	0	0	0.847	0.975	1.361	1.151	1.606	1.396	1	1	1	1	1	1	95.6	81	93.2	130.1	5.04	8.64	6.2	5.43	High	High	High	High	High	High	High	High	High	High	High	High
FALSE	High	Master Protein	Dlo_pri0215F.1_g01600.1	Dlo_pri0215F.1_g01600.1	0	22.954	15	4	9	3	385	44.1	5.36	216	4	0	0	1.022	0.897	1.015	0.878	0.993	1.132	1	1	1	1	1	1	101.7	103.9	91.2	103.2	3.02	7.54	3.21	1.8	High	Not Found	High	High	Not Found	High	High	Not Found	High	High	Not Found	High
FALSE	High	Master Protein	Dlo_pri0001F.1_g00260.1	Dlo_pri0001F.1_g00260.1	0	15.902	25	3	9	2	146	16.7	10.81	239	3	0	0	1.141	0.928	1.133	0.813	0.993	1.221	1	1	1	1	1	1	95.2	108.6	88.3	107.8	6	1.67	2.24	3.69	High	High	High	High	High	High	High	High	High	High	High	High
FALSE	High	Master Protein	Dlo_pri0118F.1_g00130.1	Dlo_pri0118F.1_g00130.1	0	18.429	22	2	9	2	109	12.2	8.16	223	2	0	0	1.697	1.295	0.879	0.763	0.518	0.678	1	1	1	1	1	1	82.1	139.3	106.4	72.2	2	4.24	1.97	8.14	High	High	High	High	High	High	High	High	High	High	High	High
FALSE	High	Master Protein	Dlo_pri0004F.1_g00810.1	Dlo_pri0004F.1_g00810.1	0	23.018	14	5	9	5	449	49.5	5.97	229	5	0	0	0.93	0.936	0.863	1.006	0.928	0.922	1	1	1	1	1	1	107.3	99.7	100.4	92.6	4.27	5.46	1.22	1.63	High	High	High	High	High	High	High	High	High	High	High	High
FALSE	High	Master Protein	Dlo_pri0065F.1_g01420.1	Dlo_pri0065F.1_g01420.1	0	23.265	12	5	9	5	558	61.1	5.27	236	5	0	0	0.967	0.981	0.877	1.015	0.907	0.893	1	1	1	1	1	1	104.6	101.1	102.6	91.7	2.77	4.84	2.63	1.2	High	High	High	High	High	High	High	High	High	High	High	High
FALSE	High	Master Protein	Dlo_pri0597F.1_g00250.1	Dlo_pri0597F.1_g00250.1	0	16.405	11	3	9	3	366	41.5	9.07	268	3	0	0	0.958	0.906	1.131	0.946	1.181	1.248	1	1	1	1	1	1	100.1	95.9	90.7	113.2	1.6	2.85	1.21	2.85	High	High	High	High	High	High	High	High	High	High	High	High
FALSE	High	Master Protein	Dlo_alt0023F-040-01.1_g00020.1	Dlo_alt0023F-040-01.1_g00020.1	0	21.157	7	3	9	1	455	49.9	8.13	252	3	0	2	0.964	1.101	0.787	1.142	0.817	0.715	1	1	1	1	1	1	103.8	100.1	114.3	81.8	2.33	4.21	1.71	6.97	Not Found	High	High	Not Found	High	High	Not Found	High	High	Not Found	High	High
FALSE	High	Master Protein	Dlo_pri0134F.1_g01200.1	Dlo_pri0134F.1_g01200.1	0	29.406	17	6	9	1	480	53.1	7.31	238	6	0	0	0.467	0.471	0.594	1.008	1.272	1.262							157.9	73.8	74.4	93.9					Not Found	High	Not Found	Not Found	High	Not Found	Not Found	High	Not Found	Not Found	High	Not Found
FALSE	High	Master Protein	Dlo_pri0181F.1_g01580.1	Dlo_pri0181F.1_g01580.1	0	19.034	7	4	9	4	594	65.6	6.64	183	4	0	0	1.29	1.013	1.014	0.785	0.786	1.002	1	1	1	1	1	1	92.7	119.5	93.8	94	4.42	10.34	6.46	2.88	High	High	High	High	High	High	High	High	High	High	High	High
FALSE	High	Master Protein	Dlo_pri0219F.1_g00830.1	Dlo_pri0219F.1_g00830.1	0	26.852	15	4	9	4	362	39.8	8	254	4	0	0	1.458	1.21	1.517	0.83	1.041	1.253	1	1	1	1	1	1	77.1	112.5	93.4	117	12.65	2.42	2.4	6.25	High	High	High	High	High	High	High	High	High	High	High	High
FALSE	High	Master Protein	Dlo_pri0104F.1_g00260.1	Dlo_pri0104F.1_g00260.1	0	19.128	8	5	9	5	727	82.6	9.44	221	5	0	0	1.051	0.975	1.104	0.928	1.05	1.132	1	1	1	1	1	1	96.9	101.8	94.4	106.9	0.82	9.13	5.62	3.06	High	High	High	High	High	High	High	High	High	High	High	High
FALSE	High	Master Protein	Dlo_pri0613F.1_g00410.1	Dlo_pri0613F.1_g00410.1	0	14.954	7	4	9	4	641	73.8	7.96	271	4	0	0	0.945	0.927	0.944	0.981	0.999	1.018	1	1	1	1	1	1	104.8	99.1	97.2	98.9	4.6	9.49	5.68	2.08	High	High	High	High	High	High	High	High	High	High	High	High
FALSE	High	Master Protein	Dlo_pri0113F.1_g00010.1	Dlo_pri0113F.1_g00010.1	0	23.197	5	5	9	5	1277	140.8	4.79	242	5	0	0	1.009	1.112	0.956	1.102	0.947	0.86	1	1	1	1	1	1	98.1	99	109.1	93.8	4.67	3.39	2.33	3.68	High	High	High	High	High	High	High	High	High	High	High	High
FALSE	High	Master Protein	Dlo_pri0055F.1_g01880.1	Dlo_pri0055F.1_g01880.1	0	14.318	14	4	9	3	327	36.5	6.25	175	4	0	0	0.726	0.978	1.028	1.348	1.417	1.051	1	1	1	1	1	1	107.2	77.8	104.9	110.2	7.66	1.68	3.79	10.07	High	High	High	High	High	High	High	High	High	High	High	High
FALSE	High	Master Protein	Dlo_pri0246F.1_g00330.1	Dlo_pri0246F.1_g00330.1	0	11.361	14	3	9	1	213	23.8	5.16	151	3	0	0	1.009	1.035	0.968	1.026	0.96	0.936	1	1	1	1	1	1	99.7	100.6	103.2	96.5	6.74	8.69	3.65	2.63	High	High	High	High	High	High	High	High	High	High	High	High
FALSE	High	Master Protein	Dlo_pri0502F.1_g00410.1	Dlo_pri0502F.1_g00410.1	0	24.346	17	5	9	5	364	40.8	8.27	230	5	0	0	1.04	0.985	0.895	0.947	0.86	0.908	1	1	1	1	1	1	102	106.1	100.5	91.3	4.97	3.53	4.81	3.87	High	High	High	High	High	High	High	High	High	High	High	High
FALSE	High	Master Protein	Dlo_pri0565F.1_g00340.1	Dlo_pri0565F.1_g00340.1	0	19.027	11	4	9	4	476	51.9	6.8	238	4	0	0	0.987	0.827	0.966	0.839	0.98	1.168	1	1	1	1	1	1	105.8	104.4	87.5	102.3	4.9	13.03	8.66	1.04	High	High	High	High	High	High	High	High	High	High	High	High
FALSE	High	Master Protein	Dlo_pri0297F.1_g00300.1	Dlo_pri0297F.1_g00300.1	0	26.527	5	6	9	6	1239	135.6	6.47	174	6	0	0	0.847	1.01	0.915	1.192	1.08	0.906	1	1	1	1	1	1	106	89.8	107.1	97.1	11.2	11.74	1.97	7.26	High	High	High	High	High	High	High	High	High	High	High	High
FALSE	High	Master Protein	Dlo_pri0055F.1_g00520.1	Dlo_pri0055F.1_g00520.1	0	7.113	5	2	9	2	354	37.6	6.52	221	2	0	0	1.517	1.144	2.146	0.754	1.414	1.876	1	1	0.261389	1	1	0.46586	68.9	104.5	78.8	147.8	1.79	3.89	0.4	3.69	High	High	High	High	High	High	High	High	High	High	High	High
FALSE	High	Master Protein	Dlo_pri0062F.1_g01350.1	Dlo_pri0062F.1_g01350.1	0	20.264	28	5	9	5	186	20	9.45	200	5	0	0	1.264	1.158	1.189	0.916	0.94	1.027	1	1	1	1	1	1	86.8	109.7	100.4	103.1	3.22	3.82	1.43	0.68	High	High	High	High	High	High	High	High	High	High	High	High
FALSE	High	Master Protein	Dlo_pri0112F.1_g02860.1	Dlo_pri0112F.1_g02860.1	0	30.263	23	5	9	5	296	32.7	5.05	257	5	0	0	1.084	1.084	1.012	1	0.933	0.933	1	1	1	1	1	1	95.7	103.7	103.8	96.8	3.48	2.2	4.92	2.4	High	High	High	High	High	High	High	High	High	High	High	High
FALSE	High	Master Protein	Dlo_pri0299F.1_g00780.1	Dlo_pri0299F.1_g00780.1	0	17.209	6	2	9	1	466	51.6	5.05	277	2	0	0	2.972	0.855	2.488	0.288	0.837	2.909	0.851172	1	1	0.594366	1	1	54.7	162.5	46.8	136	6.81	3.46	5.72	1	High	High	High	High	High	High	High	High	High	High	High	High
FALSE	High	Master Protein	Dlo_pri0023F.1_g02380.1	Dlo_pri0023F.1_g02380.1	0	14.26	6	4	8	4	634	72.6	6.04	176	4	0	0	0.962	0.912	0.999	0.948	1.037	1.094	1	1	1	1	1	1	103.3	99.4	94.2	103.1	1.61	5.29	1.04	2.76	High	High	High	High	High	High	High	High	High	High	High	High
FALSE	High	Master Protein	Dlo_alt0076F-013-01.1_g00210.1	Dlo_alt0076F-013-01.1_g00210.1	0	16.973	10	4	8	4	440	46.9	8.85	168	4	0	0	2.069	1.483	1.107	0.717	0.535	0.746	1	1	1	1	1	1	70.7	146.2	104.8	78.3	5.39	3.46	2.54	3.64	High	High	High	High	High	High	High	High	High	High	High	High
FALSE	High	Master Protein	Dlo_pri0064F.1_g02120.1	Dlo_pri0064F.1_g02120.1	0	27.276	52	5	8	5	122	13.8	6.8	188	5	0	0	1.012	1.003	1.004	0.991	0.992	1.001	1	1	1	1	1	1	99.5	100.7	99.8	99.9	3.1	6.53	1.88	4.09	High	High	High	High	High	High	High	High	High	High	High	High
FALSE	High	Master Protein	Dlo_pri0022F.1_g05320.1	Dlo_pri0022F.1_g05320.1	0	17.43	39	4	8	4	102	11.7	8.88	158	4	0	0	0.79	0.797	0.828	1.009	1.049	1.039	0.140684	0.39913	0.312165	1	1	1	117.1	92.5	93.4	97	2.61	1.39	4.12	0.78	High	High	High	High	High	High	High	High	High	High	High	High
FALSE	High	Master Protein	Dlo_pri0572F.1_g00390.1	Dlo_pri0572F.1_g00390.1	0	15.046	16	3	8	3	213	23.9	5.17	251	3	0	0	4.459	1.33	1.328	0.298	0.298	0.999	1	1	1	1	1	1	49.3	219.7	65.5	65.4	50.64	33.68	18.14	38.29	High	High	High	High	High	High	High	High	High	High	High	High
FALSE	High	Master Protein	Dlo_pri0556F.1_g00280.1	Dlo_pri0556F.1_g00280.1	0	15.667	7	4	8	1	601	67.2	5.8	169	4	0	0	0.88	0.959	0.681	1.089	0.773	0.71							113.6	100	109	77.4					Not Found	High	Not Found	Not Found	High	Not Found	Not Found	High	Not Found	Not Found	High	Not Found
FALSE	High	Master Protein	Dlo_pri0046F.1_g01290.1	Dlo_pri0046F.1_g01290.1	0	21.317	30	4	8	4	182	20.7	6.73	173	4	0	0	0.986	1.554	0.969	1.577	0.983	0.624	1	1	1	1	1	1	88.7	87.4	137.9	86	2.38	1.11	2.18	2.03	High	High	High	High	High	High	High	High	High	High	High	High
FALSE	High	Master Protein	Dlo_pri0041F.1_g02710.1	Dlo_pri0041F.1_g02710.1	0	27.36	19	4	8	4	313	34.7	5.12	245	4	0	0	1.165	1.064	1.003	0.913	0.86	0.943	1	1	1	1	1	1	94.5	110.2	100.5	94.8	4.09	5.34	3.39	1.17	High	High	High	High	High	High	High	High	High	High	High	High
FALSE	High	Master Protein	Dlo_pri0023F.1_g01300.1	Dlo_pri0023F.1_g01300.1	0	25.265	22	6	8	6	314	34	6.04	238	6	0	0	1.039	0.962	0.961	0.926	0.925	1	1	1	1	1	1	1	101	104.9	97.1	97.1	1.25	7.89	6.5	2.67	High	High	High	High	High	High	High	High	High	High	High	High
FALSE	High	Master Protein	Dlo_pri0004F.1_g03960.1	Dlo_pri0004F.1_g03960.1	0	18.404	14	3	8	3	343	39.4	8.05	225	3	0	0	1.25	0.89	1.003	0.712	0.803	1.127	1	1	1	1	1	1	96.5	120.7	85.9	96.8	2.04	5.36	3.96	3.29	High	High	High	High	High	High	High	High	High	High	High	High
FALSE	High	Master Protein	Dlo_pri0066F.1_g03590.1	Dlo_pri0066F.1_g03590.1	0	20.554	15	4	8	3	361	40.2	8.6	254	4	0	1	1.102	0.932	1.028	0.846	0.933	1.103	1	1	1	1	1	1	98.5	108.5	91.8	101.2	3.28	6.75	3.57	1.11	High	High	High	High	High	High	High	High	High	High	High	High
FALSE	High	Master Protein	Dlo_alt0248F-003-01.1_g00110.1	Dlo_alt0248F-003-01.1_g00110.1	0	24.604	16	6	8	6	481	54.5	6.34	146	6	0	0	1.269	0.851	1.152	0.67	0.907	1.354	1	1	1	1	1	1	93.6	118.9	79.7	107.8	3.4	1.54	4.94	1.73	High	High	High	High	High	High	High	High	High	High	High	High
FALSE	High	Master Protein	Dlo_pri0700F.1_g00360.1	Dlo_pri0700F.1_g00360.1	0	15.983	14	4	8	4	318	36.1	5.24	147	4	0	0	0.231	0.377	0.283	1.634	1.226	0.751	1	1	1	1	1	1	211.6	48.8	79.7	59.8	5.38	11.88	2.4	8.42	High	High	High	High	High	High	High	High	High	High	High	High
FALSE	High	Master Protein	Dlo_pri0002F.1_g03380.1	Dlo_pri0002F.1_g03380.1	0	23.648	23	4	8	4	230	26.2	5.41	244	4	0	0	0.986	0.972	0.943	0.986	0.957	0.97	1	1	1	1	1	1	102.5	101.1	99.7	96.7	3.22	13.72	11.67	0.88	High	High	High	High	High	High	High	High	High	High	High	High
FALSE	High	Master Protein	Dlo_pri0143F.1_g00420.1	Dlo_pri0143F.1_g00420.1	0	18.541	35	4	8	2	128	14.3	9.55	223	4	0	2	1.027	1.003	0.83	0.977	0.808	0.828	1	1	1	1	1	1	103.6	106.4	104	86	2.57	5.42	3.78	7.48	High	High	High	High	High	High	High	High	High	High	High	High
FALSE	High	Master Protein	Dlo_pri0462F.1_g00360.1	Dlo_pri0462F.1_g00360.1	0	18.47	10	3	8	3	351	38.5	6.89	222	3	0	0	0.903	1.02	0.9	1.13	0.997	0.883	1	1	1	1	1	1	104.6	94.5	106.7	94.2	5.32	4.69	2.07	3.46	High	High	High	High	High	High	High	High	High	High	High	High
FALSE	High	Master Protein	Dlo_pri0254F.1_g00040.1	Dlo_pri0254F.1_g00040.1	0	29.584	17	5	8	5	440	49.9	5.29	263	5	0	0	1.198	1.169	1.03	0.976	0.86	0.881	1	1	1	1	1	1	91	109	106.3	93.7	4.03	5.14	5.92	5.36	High	High	High	High	High	High	High	High	High	High	High	High
FALSE	High	Master Protein	Dlo_pri0200F.1_g02140.1	Dlo_pri0200F.1_g02140.1	0	15.526	18	3	8	3	176	19.4	7.34	178	3	0	0	0.814	1.006	0.805	1.236	0.989	0.8	1	1	1	1	1	1	110.3	89.8	111	88.8	4.28	7.43	2.03	2.9	High	High	High	High	High	High	High	High	High	High	High	High
FALSE	High	Master Protein	Dlo_pri0128F.1_g01650.1	Dlo_pri0128F.1_g01650.1	0	28.307	37	5	8	5	248	28	4.92	228	5	0	0	0.712	1.102	0.636	1.547	0.893	0.577	1	1	1	1	1	1	115.9	82.6	127.7	73.7	7.22	6.37	4.54	9.23	High	High	High	High	High	High	High	High	High	High	High	High
FALSE	High	Master Protein	Dlo_pri0313F.1_g01080.1	Dlo_pri0313F.1_g01080.1	0	23.95	4	5	8	4	921	101.7	6.3	157	5	0	0	0.965	0.683	0.607	0.707	0.629	0.889	1	1	1	1	1	1	122.9	118.6	83.9	74.6	10.68	9.73	12.44	17.13	High	High	High	High	High	High	High	High	High	High	High	High
FALSE	High	Master Protein	Dlo_pri0059F.1_g02150.1	Dlo_pri0059F.1_g02150.1	0	16.52	14	4	8	3	340	35.9	4.86	155	4	0	1	1.153	1.167	1.102	1.012	0.956	0.945	1	1	1	1	1	1	90.4	104.3	105.5	99.7	5.36	2.24	3.74	1.31	High	High	High	High	High	High	High	High	High	High	High	High
FALSE	High	Master Protein	Dlo_pri0024F.1_g03450.1	Dlo_pri0024F.1_g03450.1	0	10.314	7	3	8	3	371	41.6	5.88	136	3	0	0	1.924	0.924	1.77	0.48	0.92	1.915	1	1	1	1	1	1	71.2	137	65.8	126	4.93	1.1	4.12	2.54	High	High	High	High	High	High	High	High	High	High	High	High
FALSE	High	Master Protein	Dlo_pri0029F.1_g01030.1	Dlo_pri0029F.1_g01030.1	0	19.643	13	3	8	3	262	28.2	6.46	172	3	0	0	0.843	0.933	0.921	1.107	1.093	0.987	1	1	1	1	1	1	108.2	91.2	100.9	99.6	0.51	4.41	3.07	1.27	High	High	High	High	High	High	High	High	High	High	High	High
FALSE	High	Master Protein	Dlo_pri0129F.1_g01180.1	Dlo_pri0129F.1_g01180.1	0	13.223	12	2	8	2	164	18.5	10.86	320	2	0	0	1.073	1.033	0.918	0.962	0.855	0.889	1	1	1	1	1	1	99.4	106.7	102.7	91.2	0.36	0.31	1.11	0.94	High	High	High	High	High	High	High	High	High	High	High	High
FALSE	High	Master Protein	Dlo_pri0606F.1_g00500.1	Dlo_pri0606F.1_g00500.1	0	12.255	13	3	8	3	215	22.6	4.34	243	3	0	0	0.957	1.129	0.964	1.179	1.007	0.854	1	1	1	0.440663	1	0.444428	98.8	94.5	111.5	95.2	0.56	1.98	0.91	1.2	High	High	High	High	High	High	High	High	High	High	High	High
FALSE	High	Master Protein	Dlo_pri0016F.1_g00050.1	Dlo_pri0016F.1_g00050.1	0	16.566	16	5	8	5	362	40.6	5.08	155	5	0	0	0.902	0.935	0.97	1.037	1.075	1.037	1	1	1	1	1	1	105.1	94.8	98.2	101.9	4.45	6.91	1.47	2.27	High	High	High	High	High	High	High	High	High	High	High	High
FALSE	High	Master Protein	Dlo_pri0030F.1_g03090.1	Dlo_pri0030F.1_g03090.1	0	13.569	21	3	8	3	142	15.7	10.37	219	3	0	0	0.658	0.998	0.933	1.516	1.418	0.935	1	1	1	1	1	1	111.4	73.4	111.2	104	1.11	2.71	1.28	1.83	High	High	High	High	High	High	High	High	High	High	High	High
FALSE	High	Master Protein	Dlo_alt0045F-024-01.1_g00030.1	Dlo_alt0045F-024-01.1_g00030.1	0	15.877	12	3	8	2	323	36.2	7.14	159	3	0	0	1.381	0.917	0.964	0.664	0.698	1.051	1	1	1	1	1	1	93.9	129.6	86.1	90.5	0.02	0.59	2.23	2.99	High	Not Found	High	High	Not Found	High	High	Not Found	High	High	Not Found	High
FALSE	High	Master Protein	Dlo_pri0024F.1_g04260.1	Dlo_pri0024F.1_g04260.1	0	18.614	12	2	8	1	250	28.4	6.18	197	2	0	0	1.334	1.204	1.886	0.902	1.413	1.567	1	1	1	1	1	1	73.7	98.4	88.8	139.1	19.39	2.38	3.93	11.17	Not Found	High	High	Not Found	High	High	Not Found	High	High	Not Found	High	High
FALSE	High	Master Protein	Dlo_pri0380F.1_g00590.1	Dlo_pri0380F.1_g00590.1	0	21.526	12	4	8	2	349	37	6.28	276	4	0	2	1.044	0.961	0.617	0.92	0.591	0.642	1	1	0.605719	1	0.579224	0.707976	110.4	115.3	106.1	68.1	0.88	1.77	2.45	1.01	High	High	High	High	High	High	High	High	High	High	High	High
FALSE	High	Master Protein	Dlo_pri0025F.1_g04950.1	Dlo_pri0025F.1_g04950.1	0	20.547	7	5	8	5	827	92.5	6.14	189	5	0	0	0.903	0.928	1.08	1.027	1.196	1.164	1	1	1	1	1	1	102.3	92.4	94.9	110.5	1.83	5.76	2.18	3.43	High	High	High	High	High	High	High	High	High	High	High	High
FALSE	High	Master Protein	Dlo_pri0029F.1_g01000.1	Dlo_pri0029F.1_g01000.1	0	12.806	8	3	8	3	420	46.3	7.69	169	3	0	0	0.882	1.066	0.852	1.208	0.966	0.799	1	1	1	1	1	1	105.2	92.9	112.2	89.7	3.92	5.6	4.77	3.36	High	High	High	High	High	High	High	High	High	High	High	High
FALSE	High	Master Protein	Dlo_pri0032F.1_g06110.1	Dlo_pri0032F.1_g06110.1	0	15.337	11	3	8	3	396	43.2	9.64	213	3	0	0	1.356	1.017	1.065	0.75	0.785	1.046	1	1	1	1	1	1	90.1	122.2	91.7	95.9	7.12	7.09	6.13	2.76	High	High	High	High	High	High	High	High	High	High	High	High
FALSE	High	Master Protein	Dlo_pri0001F.1_g00250.1	Dlo_pri0001F.1_g00250.1	0	25.264	15	5	8	5	317	33.9	7.12	183	5	0	0	1.291	0.919	1.086	0.712	0.842	1.183	1	1	1	1	1	1	93.1	120.2	85.5	101.2	8.35	7.88	11.33	9.45	High	High	High	High	High	High	High	High	High	High	High	High
FALSE	High	Master Protein	Dlo_pri0047F.1_g01090.1	Dlo_pri0047F.1_g01090.1	0	20.328	16	5	8	3	325	36.1	6.95	197	5	0	2	1.013	0.853	0.78	0.842	0.77	0.914	1	1	1	1	1	1	109.7	111.1	93.6	85.5	1.62	1.15	4.76	5.76	High	High	High	High	High	High	High	High	High	High	High	High
FALSE	High	Master Protein	Dlo_pri0178F.1_g00810.1	Dlo_pri0178F.1_g00810.1	0	25.581	24	6	8	5	263	27.7	5.95	218	6	0	1	0.622	0.958	1.115	1.54	1.792	1.163	1	1	1	1	1	1	108.2	67.3	103.7	120.7	1.59	3.87	2.15	3.83	High	High	High	High	High	High	High	High	High	High	High	High
FALSE	High	Master Protein	Dlo_pri0165F.1_g01540.1	Dlo_pri0165F.1_g01540.1	0	9.384	6	2	8	1	378	40.9	6.67	210	2	0	0	0.54	0.374	0.281	0.694	0.52	0.75							182.2	98.4	68.2	51.2					High	Not Found	Not Found	High	Not Found	Not Found	High	Not Found	Not Found	High	Not Found	Not Found
FALSE	High	Master Protein	Dlo_pri0065F.1_g00010.1	Dlo_pri0065F.1_g00010.1	0	13.149	19	4	8	4	232	26.6	6.35	160	4	0	0	0.721	0.92	0.841	1.275	1.166	0.915	1	1	1	1	1	1	114.9	82.8	105.6	96.6	1.08	3.61	1	2.19	High	High	High	High	High	High	High	High	High	High	High	High
FALSE	High	Master Protein	Dlo_pri0305F.1_g00460.1	Dlo_pri0305F.1_g00460.1	0	25.684	13	5	8	5	571	60.3	7.2	225	5	0	0	1.123	1.109	1.095	0.987	0.975	0.987	1	1	1	1	1	1	92.5	103.8	102.5	101.2	7.34	3.64	5.71	7.52	High	High	High	High	High	High	High	High	High	High	High	High
FALSE	High	Master Protein	Dlo_alt0455F-004-01.1_g00020.1	Dlo_alt0455F-004-01.1_g00020.1	0	12.997	12	3	8	3	267	28.7	11.18	214	3	0	0	0.673	0.738	0.665	1.098	0.988	0.901	1	1	1	1	1	1	130.1	87.5	96	86.5	2.75	2.99	2.84	3.54	High	High	High	High	High	High	High	High	High	High	High	High
FALSE	High	Master Protein	Dlo_pri0025F.1_g02960.1	Dlo_pri0025F.1_g02960.1	0	17.728	37	4	8	4	115	12.8	5.95	174	4	0	0	1.452	1.067	0.974	0.735	0.671	0.913	1	1	1	1	1	1	89	129.2	95	86.8	2.65	6.84	3.07	6.07	High	High	High	High	High	High	High	High	High	High	High	High
FALSE	High	Master Protein	Dlo_pri0004F.1_g00920.1	Dlo_pri0004F.1_g00920.1	0	21.4	8	3	8	3	433	46	7.46	266	3	0	0	0.887	0.797	1.324	0.898	1.493	1.662	1	1	1	1	1	1	99.8	88.5	79.5	132.2	0.85	4.5	7.31	1.53	High	High	High	High	High	High	High	High	High	High	High	High
FALSE	High	Master Protein	Dlo_pri0533F.1_g00740.1	Dlo_pri0533F.1_g00740.1	0	23.508	24	3	8	3	101	11.1	6.9	182	3	0	0	1.185	0.976	1.193	0.823	1.006	1.222	1	1	1	1	1	1	91.9	108.9	89.7	109.6	3.55	2.69	4.24	3.78	High	High	High	High	High	High	High	High	High	High	High	High
FALSE	High	Master Protein	Dlo_pri0275F.1_g00370.1	Dlo_pri0275F.1_g00370.1	0	19.417	7	4	8	3	671	74.7	8.59	214	4	0	0	0.692	0.989	1.533	1.428	2.214	1.551	1	1	1	1	0.579224	1	94.9	65.7	93.8	145.5	13.4	15.07	3.81	0.52	High	High	Not Found	High	High	Not Found	High	High	Not Found	High	High	Not Found
FALSE	High	Master Protein	Dlo_pri0035F.1_g04000.1	Dlo_pri0035F.1_g04000.1	0	12.636	5	3	8	3	616	69.2	5.66	173	3	0	0	0.843	0.974	0.873	1.156	1.036	0.896	1	1	1	1	1	1	108.4	91.3	105.6	94.7	2.75	2.8	3.57	1.92	High	High	High	High	High	High	High	High	High	High	High	High
FALSE	High	Master Protein	Dlo_pri0305F.1_g01620.1	Dlo_pri0305F.1_g01620.1	0	13.752	9	3	8	3	494	55.2	5.55	115	3	0	0	0.782	0.94	0.812	1.202	1.039	0.864	1	1	1	1	1	1	113.2	88.5	106.4	91.9	5.13	10.68	5.36	4.79	High	High	High	High	High	High	High	High	High	High	High	High
FALSE	High	Master Protein	Dlo_pri0001F.1_g07050.1	Dlo_pri0001F.1_g07050.1	0	18.947	7	4	8	4	668	76.9	7.97	199	4	0	0	1.004	0.98	0.794	0.976	0.791	0.811	1	1	1	1	1	1	105.9	106.3	103.7	84.1	2.81	8.73	6.66	3.02	High	High	High	High	High	High	High	High	High	High	High	High
FALSE	High	Master Protein	Dlo_pri0066F.1_g03550.1	Dlo_pri0066F.1_g03550.1	0	15.325	57	4	8	4	99	11	4.84	283	4	0	0	1.12	1.031	1.125	0.921	1.005	1.092	1	1	1	1	1	1	93.5	104.7	96.4	105.3	3.82	5.14	4.44	1.39	High	High	High	High	High	High	High	High	High	High	High	High
FALSE	High	Master Protein	Dlo_pri0024F.1_g04170.1	Dlo_pri0024F.1_g04170.1	0	13.386	10	4	8	4	411	45.8	5.47	163	4	0	0	1.116	1.013	0.836	0.908	0.749	0.825	1	1	1	1	1	1	100.9	112.6	102.2	84.3	6.95	2.06	1.75	6.45	High	High	High	High	High	High	High	High	High	High	High	High
FALSE	High	Master Protein	Dlo_pri0151F.1_g02080.1	Dlo_pri0151F.1_g02080.1	0	14.07	8	5	8	1	608	65.9	9.06	137	5	0	0	0.935	0.887	1.027	0.949	1.098	1.157							103.9	97.1	92.2	106.7					High	Not Found	Not Found	High	Not Found	Not Found	High	Not Found	Not Found	High	Not Found	Not Found
FALSE	High	Master Protein	Dlo_pri0318F.1_g00350.1	Dlo_pri0318F.1_g00350.1	0	16.164	11	3	8	2	474	52.1	7.37	204	3	0	0	0.839	0.809	0.84	0.965	1.001	1.038	1	1	1	1	1	1	114.7	96.2	92.8	96.3	1.61	2.93	2.77	3.55	High	High	High	High	High	High	High	High	High	High	High	High
FALSE	High	Master Protein	Dlo_pri0074F.1_g04100.1	Dlo_pri0074F.1_g04100.1	0	14.478	10	3	8	3	346	39.3	6.06	166	3	0	0	0.523	1.471	0.804	2.815	1.539	0.547	1	1	1	1	1	1	105.3	55	154.9	84.7	4.13	4.47	18.57	50.82	High	High	High	High	High	High	High	High	High	High	High	High
FALSE	High	Master Protein	Dlo_pri0048F.1_g00230.1	Dlo_pri0048F.1_g00230.1	0	21.548	18	4	8	4	305	32.5	5.43	220	4	0	0	0.883	0.778	1.035	0.881	1.172	1.33	1	1	1	1	1	1	108.2	95.6	84.2	112	1.65	1.88	2.23	1.6	High	High	High	High	High	High	High	High	High	High	High	High
FALSE	High	Master Protein	Dlo_pri0056F.1_g00150.1	Dlo_pri0056F.1_g00150.1	0	15.843	22	3	8	3	143	16.2	7.49	315	3	0	0	0.777	0.895	1.067	1.152	1.373	1.192	1	1	1	1	1	1	107	83.1	95.8	114.1	1.7	2.28	2.43	2.29	High	High	High	High	High	High	High	High	High	High	High	High
FALSE	High	Master Protein	Dlo_pri0304F.1_g00260.1	Dlo_pri0304F.1_g00260.1	0	16.925	16	4	8	4	268	30.3	5.25	236	4	0	0	1.122	1.282	1.101	1.143	0.982	0.859	1	1	1	1	1	1	88.8	99.6	113.9	97.8	1.81	1.19	2.41	2.53	High	High	High	High	High	High	High	High	High	High	High	High
FALSE	High	Master Protein	Dlo_pri0087F.1_g00830.1	Dlo_pri0087F.1_g00830.1	0	16.508	9	3	8	3	458	50.7	5.47	224	3	0	0	1.38	1.127	1.657	0.816	1.201	1.471	1	1	1	1	1	1	77.5	106.9	87.3	128.4	5.15	4.55	1.39	4.95	High	High	High	High	High	High	High	High	High	High	High	High
FALSE	High	Master Protein	Dlo_pri0041F.1_g00190.1	Dlo_pri0041F.1_g00190.1	0	9.765	25	2	8	2	77	9	7.34	195	2	0	0	1.531	1.294	1.253	0.845	0.819	0.969	1	1	1	1	1	1	78.8	120.6	101.9	98.7	1.74	2.16	2.91	1.28	High	High	High	High	High	High	High	High	High	High	High	High
FALSE	High	Master Protein	Dlo_pri0077F.1_g00640.1	Dlo_pri0077F.1_g00640.1	0	18.588	9	3	8	3	436	47.4	6.18	231	3	0	0	1.18	0.869	1.306	0.736	1.107	1.503	1	1	1	1	1	1	91.8	108.4	79.8	120	6.32	1.17	3.11	3.65	High	High	High	High	High	High	High	High	High	High	High	High
FALSE	High	Master Protein	Dlo_pri0605F.1_g00360.1	Dlo_pri0605F.1_g00360.1	0	16.255	9	3	8	3	409	45.6	4.83	172	3	0	0	1	1.042	1.033	1.042	1.033	0.992	1	1	1	1	1	1	98.2	98.2	102.3	101.4	0.83	3.49	5.12	2.59	High	High	High	High	High	High	High	High	High	High	High	High
FALSE	High	Master Protein	Dlo_pri0001F.1_g06470.1	Dlo_pri0001F.1_g06470.1	0	14.42	15	4	8	4	347	37.9	6.13	222	4	0	0	1.069	1.04	1.041	0.973	0.974	1.001	1	1	1	1	1	1	96.4	103	100.2	100.3	3.01	3.71	2.38	1.57	High	High	High	High	High	High	High	High	High	High	High	High
FALSE	High	Master Protein	Dlo_pri0320F.1_g01260.1	Dlo_pri0320F.1_g01260.1	0	15.583	8	3	8	3	463	52	5.53	216	3	0	0	0.846	1.074	0.833	1.27	0.985	0.776	1	1	1	1	1	1	106.6	90.1	114.5	88.8	2.61	6.51	4.64	2.29	High	High	High	High	High	High	High	High	High	High	High	High
FALSE	High	Master Protein	Dlo_pri0030F.1_g03710.1	Dlo_pri0030F.1_g03710.1	0	22.067	10	4	8	1	537	59	5.05	196	4	0	0	0.722	0.828	0.88	1.147	1.219	1.063							116.6	84.2	96.5	102.6					High	High	Not Found	High	High	Not Found	High	High	Not Found	High	High	Not Found
FALSE	High	Master Protein	Dlo_pri1026F.1_g00230.1	Dlo_pri1026F.1_g00230.1	0	14.092	33	4	8	3	110	12.2	9.74	162	4	0	0	1.062	1.12	0.993	1.054	0.934	0.886	1	1	1	1	1	1	95.8	101.8	107.3	95.1	2	1.42	1.9	1.85	High	High	High	High	High	High	High	High	High	High	High	High
FALSE	High	Master Protein	Dlo_pri0817F.1_g00270.1	Dlo_pri0817F.1_g00270.1	0	13.64	10	5	8	5	412	46.7	9.2	140	5	0	0	1.072	0.996	1.031	0.929	0.961	1.035	1	1	1	1	1	1	97.6	104.6	97.2	100.6	0.66	1.27	2.85	2.04	High	High	High	High	High	High	High	High	High	High	High	High
FALSE	High	Master Protein	Dlo_pri0229F.1_g00180.1	Dlo_pri0229F.1_g00180.1	0	14.183	4	2	8	2	540	62.3	6.58	177	2	0	0	0.725	0.956	0.812	1.318	1.121	0.85	1	1	1	1	1	1	114.5	83	109.4	93	0.86	1.09	1.51	0.59	High	High	High	High	High	High	High	High	High	High	High	High
FALSE	High	Master Protein	Dlo_pri0000F.1_g13990.1	Dlo_pri0000F.1_g13990.1	0	36.242	45	4	8	2	151	15.9	10.96	171	4	0	2	1.392	0.807	1.213	0.579	0.871	1.504	1	1	1	1	1	1	90.7	126.2	73.1	110	5.6	14.65	13.64	2.82	High	High	Not Found	High	High	Not Found	High	High	Not Found	High	High	Not Found
FALSE	High	Master Protein	Dlo_pri0225F.1_g00830.1	Dlo_pri0225F.1_g00830.1	0	27.709	42	4	8	4	206	23.1	6.05	213	4	0	0	1.178	0.834	1.016	0.708	0.863	1.219	1	1	1	1	1	1	99.3	117	82.8	100.9	4.77	8.81	3.45	10.66	High	High	High	High	High	High	High	High	High	High	High	High
FALSE	High	Master Protein	Dlo_pri0000F.1_g05140.1	Dlo_pri0000F.1_g05140.1	0	17.333	26	4	8	4	191	22.1	9.8	205	4	0	0	1.122	1.1	0.987	0.981	0.88	0.897	1	1	1	1	1	1	95.1	106.6	104.6	93.8	6.54	13.67	9.18	2.39	High	High	High	High	High	High	High	High	High	High	High	High
FALSE	High	Master Protein	Dlo_pri0050F.1_g01240.1	Dlo_pri0050F.1_g01240.1	0	18.911	9	4	8	4	526	59.6	6.33	186	4	0	0	1.048	0.893	1.135	0.852	1.083	1.271	1	1	1	1	1	1	98.1	102.8	87.6	111.4	7.56	1.37	3.96	4.77	High	High	High	High	High	High	High	High	High	High	High	High
FALSE	High	Master Protein	Dlo_pri0209F.1_g01430.1	Dlo_pri0209F.1_g01430.1	0	18.862	24	2	8	2	104	11.5	5.27	319	2	0	0	1.342	0.954	0.815	0.711	0.608	0.854	1	1	1	1	1	1	97.3	130.5	92.8	79.3	1.77	0.56	2.05	0.79	High	High	High	High	High	High	High	High	High	High	High	High
FALSE	High	Master Protein	Dlo_pri0134F.1_g00670.1	Dlo_pri0134F.1_g00670.1	0	16.314	25	4	8	4	212	23.7	4.79	240	4	0	0	1.161	0.783	1.215	0.675	1.047	1.551	1	1	1	0.583276	1	0.494872	96.2	111.6	75.3	116.9	2.8	5.71	0.82	7.29	High	High	High	High	High	High	High	High	High	High	High	High
FALSE	High	Master Protein	Dlo_pri0045F.1_g04230.1	Dlo_pri0045F.1_g04230.1	0	14.205	13	3	8	2	261	28.9	7.09	165	3	0	0	1.386	0.922	1.011	0.665	0.729	1.097	1	1	1	1	1	1	92.6	128.4	85.4	93.6	3.99	5	1.79	1.27	High	High	Not Found	High	High	Not Found	High	High	Not Found	High	High	Not Found
FALSE	High	Master Protein	Dlo_pri0122F.1_g01930.1	Dlo_pri0122F.1_g01930.1	0	19.283	10	5	8	5	528	60.4	7.36	180	5	0	0	0.998	0.944	1.026	0.946	1.028	1.087	1	1	1	1	1	1	100.8	100.6	95.2	103.4	0.82	4.21	4.9	1.14	High	High	High	High	High	High	High	High	High	High	High	High
FALSE	High	Master Protein	Dlo_pri0362F.1_g00650.1	Dlo_pri0362F.1_g00650.1	0	21.451	15	3	8	3	342	38.1	6.38	240	3	0	0	1.005	1.174	1.047	1.168	1.043	0.892	1	1	1	1	1	1	94.7	95.1	111.1	99.1	1.1	0.81	1.72	1.22	High	High	High	High	High	High	High	High	High	High	High	High
FALSE	High	Master Protein	Dlo_pri0383F.1_g00560.1	Dlo_pri0383F.1_g00560.1	0	13.924	5	4	8	4	851	96.2	5.85	156	4	0	0	1.408	1.145	1.262	0.813	0.896	1.102	1	1	1	1	1	1	83.1	117	95.1	104.8	9.97	0.3	10.05	2.38	High	High	High	High	High	High	High	High	High	High	High	High
FALSE	High	Master Protein	Dlo_pri0026F.1_g00210.1	Dlo_pri0026F.1_g00210.1	0	16.038	17	4	8	4	196	22.5	10.05	210	4	0	0	0.826	1.024	0.845	1.239	1.023	0.825	1	1	1	1	1	1	108.2	89.4	110.8	91.5	3.79	5.17	2.87	3.5	High	High	High	High	High	High	High	High	High	High	High	High
FALSE	High	Master Protein	Dlo_pri0193F.1_g01820.1	Dlo_pri0193F.1_g01820.1	0	24.654	11	4	8	4	469	51.7	7.65	222	4	0	0	1.049	0.991	1.027	0.944	0.979	1.036	1	1	1	1	1	1	98.4	103.2	97.4	101	2.66	2.82	1.91	2.87	High	High	High	High	High	High	High	High	High	High	High	High
FALSE	High	Master Protein	Dlo_pri0092F.1_g01010.1	Dlo_pri0092F.1_g01010.1	0	28.477	11	5	8	5	697	75.7	8.75	207	5	0	0	0.88	1.049	0.889	1.192	1.011	0.848	1	1	1	1	1	1	104.8	92.2	109.9	93.2	4.78	3.27	3.13	2.79	High	High	High	High	High	High	High	High	High	High	High	High
FALSE	High	Master Protein	Dlo_pri0284F.1_g00910.1	Dlo_pri0284F.1_g00910.1	0	15.894	19	3	8	3	160	17.6	9.31	166	3	0	0	0.677	0.907	0.819	1.34	1.21	0.903	1	1	1	1	1	1	117.6	79.6	106.6	96.3	0.39	0.96	2.1	2.04	High	High	High	High	High	High	High	High	High	High	High	High
FALSE	High	Master Protein	Dlo_alt0178F-012-01.1_g00020.1	Dlo_alt0178F-012-01.1_g00020.1	0	15.452	6	3	8	3	490	54.6	5.57	194	3	0	0	0.693	0.939	0.819	1.356	1.183	0.872	0.749591	1	1	1	1	1	115.9	80.3	108.9	94.9	1.12	2.18	3.13	2.75	High	High	High	High	High	High	High	High	High	High	High	High
FALSE	High	Master Protein	Dlo_alt0025F-005-01.1_g00020.1	Dlo_alt0025F-005-01.1_g00020.1	0	17.263	27	2	8	2	113	12.4	6.76	266	2	0	0	0.736	1.236	1.136	1.679	1.544	0.92	1	1	1	1	1	1	97.4	71.7	120.3	110.7	1.64	0.99	0.53	2.04	High	High	High	High	High	High	High	High	High	High	High	High
FALSE	High	Master Protein	Dlo_alt0104F-004-01.1_g00160.1	Dlo_alt0104F-004-01.1_g00160.1	0	16.291	22	3	8	1	208	21.9	4.93	258	3	0	0	0.831	1.187	0.769	1.427	0.926	0.648	1	1	1	1	1	1	105.6	87.8	125.3	81.3	5.54	5.53	8.84	0.47	High	High	Not Found	High	High	Not Found	High	High	Not Found	High	High	Not Found
FALSE	High	Master Protein	Dlo_pri0006F.1_g03710.1	Dlo_pri0006F.1_g03710.1	0	18.909	12	4	8	4	396	42.9	7.93	239	4	0	0	0.787	0.924	0.661	1.175	0.84	0.715	1	1	1	1	1	1	118.6	93.3	109.7	78.4	1.94	4.01	1.68	4.8	High	High	High	High	High	High	High	High	High	High	High	High
FALSE	High	Master Protein	Dlo_pri0313F.1_g00030.1	Dlo_pri0313F.1_g00030.1	0	15.051	20	3	8	3	182	20.4	5.38	224	3	0	0	0.692	0.998	0.981	1.443	1.418	0.982	1	1	1	1	1	1	109	75.4	108.8	106.9	5.39	22.22	9.91	2.91	High	High	High	High	High	High	High	High	High	High	High	High
FALSE	High	Master Protein	Dlo_pri0077F.1_g02160.1	Dlo_pri0077F.1_g02160.1	0	22.223	9	5	8	5	748	80.6	8.44	219	5	0	0	1.175	0.887	1.425	0.755	1.212	1.607	1	1	1	1	1	1	89.2	104.8	79.1	127	4.07	3.09	10.47	7.66	High	High	High	High	High	High	High	High	High	High	High	High
FALSE	High	Master Protein	Dlo_pri0325F.1_g00700.1	Dlo_pri0325F.1_g00700.1	0	24.73	6	4	8	3	893	96.8	6.47	205	4	0	1	1.231	1.003	1.089	0.815	0.884	1.085	1	1	1	1	1	1	92.5	113.9	92.8	100.7	0.52	3.22	7.99	3.93	High	High	High	High	High	High	High	High	High	High	High	High
FALSE	High	Master Protein	Dlo_pri0067F.1_g00980.1	Dlo_pri0067F.1_g00980.1	0	17.039	21	4	8	4	237	25.5	8	183	4	0	0	0.857	0.921	0.885	1.075	1.032	0.96	1	1	1	1	1	1	109.2	93.6	100.6	96.6	1.63	1.76	2.12	1.35	High	High	High	High	High	High	High	High	High	High	High	High
FALSE	High	Master Protein	Dlo_pri0209F.1_g01990.1	Dlo_pri0209F.1_g01990.1	0	18.219	18	4	8	1	220	24.8	8.73	188	4	0	1	0.914	1.027	1.03	1.124	1.127	1.003							100.7	92.1	103.5	103.7					High	Not Found	Not Found	High	Not Found	Not Found	High	Not Found	Not Found	High	Not Found	Not Found
FALSE	High	Master Protein	Dlo_pri0159F.1_g02530.1	Dlo_pri0159F.1_g02530.1	0	17.914	11	4	8	3	415	45	7.09	214	4	0	0	1.113	0.89	1.159	0.8	1.041	1.303	1	1	1	1	1	1	96.1	107	85.5	111.4	2.72	0.98	1.78	0.15	High	High	High	High	High	High	High	High	High	High	High	High
FALSE	High	Master Protein	Dlo_pri0112F.1_g02210.1	Dlo_pri0112F.1_g02210.1	0	20.821	10	4	8	3	532	59.5	8.85	237	4	0	1	2.028	1.55	1.235	0.764	0.609	0.797	1	1	1	1	1	1	68.8	139.5	106.7	85	0.79	6.48	9.67	1.17	High	High	High	High	High	High	High	High	High	High	High	High
FALSE	High	Master Protein	Dlo_pri0038F.1_g02890.1	Dlo_pri0038F.1_g02890.1	0	27.554	16	4	8	4	438	47.9	9.33	244	4	0	0	1.104	1.035	1.08	0.937	0.977	1.043	1	1	1	1	1	1	94.8	104.7	98.1	102.3	2.02	5.63	7.33	2.32	High	High	High	High	High	High	High	High	High	High	High	High
FALSE	High	Master Protein	Dlo_alt0581F-003-01.1_g00040.1	Dlo_alt0581F-003-01.1_g00040.1	0	16.911	7	4	7	4	581	64.7	8.25	181	4	0	0	1.085	0.992	1.041	0.914	0.959	1.05	1	1	1	1	1	1	97.1	105.4	96.3	101.1	1.31	3.03	2.32	1.78	High	High	High	High	High	High	High	High	High	High	High	High
FALSE	High	Master Protein	Dlo_pri0546F.1_g00270.1	Dlo_pri0546F.1_g00270.1	0	8.723	3	2	7	2	665	71.2	5.57	205	2	0	0	0.782	0.913	0.711	1.168	0.909	0.779	1	1	1	1	1	1	117.4	91.9	107.2	83.5	5.1	4.43	2.72	2.83	High	High	High	High	High	High	High	High	High	High	High	High
FALSE	High	Master Protein	Dlo_pri0316F.1_g01290.1	Dlo_pri0316F.1_g01290.1	0	24.956	11	4	7	4	428	47.6	7.94	201	4	0	0	1.062	1.036	1.069	0.975	1.007	1.033	1	1	1	1	1	1	96	101.9	99.4	102.7	7.68	4.73	5.29	3.73	High	High	High	High	High	High	High	High	High	High	High	High
FALSE	High	Master Protein	Dlo_alt0010F-016-01.1_g00100.1	Dlo_alt0010F-016-01.1_g00100.1	0	18.808	9	5	7	5	624	69.9	9.39	134	5	0	0	1.095	1.12	0.958	1.022	0.875	0.856	1	1	1	1	1	1	95.9	105	107.3	91.8	7.13	8.71	4.66	2.9	High	High	High	High	High	High	High	High	High	High	High	High
FALSE	High	Master Protein	Dlo_pri0031F.1_g00350.1	Dlo_pri0031F.1_g00350.1	0	22.295	18	5	7	5	458	51.4	6.8	222	5	0	0	0.797	1.039	0.796	1.304	0.999	0.766	1	1	1	1	1	1	110.2	87.8	114.4	87.6	2.74	1.72	0.69	3.82	High	High	High	High	High	High	High	High	High	High	High	High
FALSE	High	Master Protein	Dlo_pri0159F.1_g01150.1	Dlo_pri0159F.1_g01150.1	0	20.856	11	4	7	4	452	49.4	8.46	246	4	0	0	1.189	0.98	1.084	0.824	0.912	1.106	1	1	1	1	1	1	94.1	111.8	92.2	102	1.99	1.97	6.14	1.66	High	High	High	High	High	High	High	High	High	High	High	High
FALSE	High	Master Protein	Dlo_pri0098F.1_g02500.1	Dlo_pri0098F.1_g02500.1	0	17.248	11	4	7	4	360	40.2	9.82	170	4	0	0	1.021	1.035	0.876	1.014	0.858	0.846	1	1	1	1	1	1	101.7	103.8	105.3	89.1	4.24	5.65	3.3	7.39	High	High	High	High	High	High	High	High	High	High	High	High
FALSE	High	Master Protein	Dlo_pri0333F.1_g00360.1	Dlo_pri0333F.1_g00360.1	0	18.758	14	4	7	3	370	39.8	6.27	163	4	0	0	0.811	0.962	0.649	1.186	0.8	0.675	1	1	1	1	1	1	116.9	94.8	112.5	75.9	7.26	8.32	3.2	6.64	High	High	High	High	High	High	High	High	High	High	High	High
FALSE	High	Master Protein	Dlo_pri0025F.1_g04760.1	Dlo_pri0025F.1_g04760.1	0	16.977	33	2	7	2	126	13.5	4.2	272	2	0	0	1.013	1.088	0.913	1.074	0.902	0.839	1	1	1	1	1	1	99.6	100.9	108.4	91	1.31	6.49	4.77	4.79	High	High	High	High	High	High	High	High	High	High	High	High
FALSE	High	Master Protein	Dlo_pri0505F.1_g00530.1	Dlo_pri0505F.1_g00530.1	0	17.349	12	4	7	4	361	40.2	5.31	223	4	0	0	1.247	0.904	1.458	0.725	1.169	1.612	1	1	1	1	1	1	86.8	108.2	78.5	126.5	5.65	3.5	2.29	2.66	High	High	High	High	High	High	High	High	High	High	High	High
FALSE	High	Master Protein	Dlo_pri0010F.1_g00960.1	Dlo_pri0010F.1_g00960.1	0	17.357	7	5	7	5	691	71.7	5.6	119	5	0	0	0.842	1.047	0.856	1.243	1.016	0.818	1	1	1	1	1	1	106.8	89.9	111.8	91.4	1.88	2.21	3.47	4.35	High	High	High	High	High	High	High	High	High	High	High	High
FALSE	High	Master Protein	Dlo_pri0110F.1_g00340.1	Dlo_pri0110F.1_g00340.1	0	14.92	29	2	7	2	96	10.5	8.41	209	2	0	0	0.936	0.866	0.683	0.925	0.729	0.788	1	1	1	1	1	1	114.8	107.5	99.4	78.4	2.02	1.04	1.27	5	High	High	High	High	High	High	High	High	High	High	High	High
FALSE	High	Master Protein	Dlo_pri0076F.1_g00240.1	Dlo_pri0076F.1_g00240.1	0	10.94	3	2	7	2	1033	113	6.47	153	2	0	0	1.178	1.196	1.064	1.016	0.903	0.889	1	1	1	1	1	1	90.1	106.2	107.8	95.9	3.15	0.92	1.49	3.71	High	High	High	High	High	High	High	High	High	High	High	High
FALSE	High	Master Protein	Dlo_pri0088F.1_g00620.1	Dlo_pri0088F.1_g00620.1	0	27.84	10	5	7	4	613	68.6	8.1	162	5	0	0	0.886	0.84	1.053	0.948	1.188	1.253	1	1	1	1	1	1	105.8	93.8	88.9	111.4	2.38	1.52	1.97	2.55	High	Not Found	High	High	Not Found	High	High	Not Found	High	High	Not Found	High
FALSE	High	Master Protein	Dlo_pri0248F.1_g00270.1	Dlo_pri0248F.1_g00270.1	0	9.789	7	4	7	4	488	56.1	7.99	127	4	0	0	0.884	0.993	0.909	1.123	1.028	0.915	1	1	1	1	1	1	105.7	93.4	104.9	96	9.42	7.28	5.56	4.33	High	High	High	High	High	High	High	High	High	High	High	High
FALSE	High	Master Protein	Dlo_pri0074F.1_g01900.1	Dlo_pri0074F.1_g01900.1	0	10.147	13	2	7	2	200	22.2	4.98	174	2	0	0	0.849	0.665	0.713	0.784	0.84	1.071	1	1	1	1	1	1	124	105.2	82.5	88.4	6.67	5.38	9.7	6.46	High	High	High	High	High	High	High	High	High	High	High	High
FALSE	High	Master Protein	Dlo_pri0103F.1_g01420.1	Dlo_pri0103F.1_g01420.1	0	7.984	7	2	7	2	382	43.1	9.28	144	2	0	0	0.872	0.932	1.016	1.068	1.165	1.091	1	1	1	1	1	1	104.7	91.3	97.6	106.4	1.95	4.83	1.41	3.56	High	High	High	High	High	High	High	High	High	High	High	High
FALSE	High	Master Protein	Dlo_pri0057F.1_g02080.1	Dlo_pri0057F.1_g02080.1	0	9.449	6	3	7	3	499	54.4	7.39	140	3	0	0	0.933	0.992	0.993	1.064	1.064	1.001	1	1	1	1	1	1	102.1	95.2	101.3	101.4	1.6	5.65	7.68	4.82	High	High	High	High	High	High	High	High	High	High	High	High
FALSE	High	Master Protein	Dlo_pri0425F.1_g00470.1	Dlo_pri0425F.1_g00470.1	0	14.61	6	3	7	3	623	66.1	7.58	165	3	0	0	1.127	1.168	1.119	1.036	0.993	0.958	1	1	1	1	1	1	90.6	102.1	105.9	101.4	7.85	8.25	3.55	3.07	High	High	High	High	High	High	High	High	High	High	High	High
FALSE	High	Master Protein	Dlo_pri0016F.1_g00980.1	Dlo_pri0016F.1_g00980.1	0	15.588	3	3	7	1	882	98.1	8.21	163	3	0	0	0.805	1.105	1.009	1.372	1.252	0.913							102.1	82.2	112.8	102.9					Not Found	High	Not Found	Not Found	High	Not Found	Not Found	High	Not Found	Not Found	High	Not Found
FALSE	High	Master Protein	Dlo_pri0180F.1_g02050.1	Dlo_pri0180F.1_g02050.1	0	8.564	23	2	7	2	100	11.1	8.48	180	2	0	0	1.311	1.153	1.196	0.88	0.913	1.038	1	1	1	1	1	1	85.8	112.5	99	102.7	3.04	2.11	2.44	3.9	High	High	High	High	High	High	High	High	High	High	High	High
FALSE	High	Master Protein	Dlo_pri0218F.1_g00330.1	Dlo_pri0218F.1_g00330.1	0	13.328	10	3	7	3	332	36.6	5.48	211	3	0	0	0.582	0.938	0.598	1.612	1.027	0.637	1	1	1	1	1	1	128.3	74.7	120.4	76.7	4.53	2.74	2.8	1.15	High	High	High	High	High	High	High	High	High	High	High	High
FALSE	High	Master Protein	Dlo_pri0039F.1_g00370.1	Dlo_pri0039F.1_g00370.1	0	10.565	11	3	7	3	302	32.7	9.5	171	3	0	0	1.244	1.072	1.101	0.862	0.885	1.027	1	1	1	1	1	1	90.6	112.7	97.1	99.7	3.98	1.02	3.27	2.18	High	High	High	High	High	High	High	High	High	High	High	High
FALSE	High	Master Protein	Dlo_pri0118F.1_g03270.1	Dlo_pri0118F.1_g03270.1	0	16.05	8	4	7	4	584	63.3	6.54	135	4	0	0	0.801	0.992	0.803	1.239	1.003	0.81	1	1	1	1	1	1	111.2	89.1	110.4	89.4	2.84	5.63	5.95	6.08	High	High	High	High	High	High	High	High	High	High	High	High
FALSE	High	Master Protein	Dlo_alt0159F-002-01.1_g00050.1	Dlo_alt0159F-002-01.1_g00050.1	0	11.396	12	3	7	3	261	29.2	4.55	179	3	0	0	0.898	0.972	0.957	1.083	1.066	0.984	1	1	1	1	1	1	104.5	93.8	101.6	100	3.29	2.71	2.79	2.68	High	High	High	High	High	High	High	High	High	High	High	High
FALSE	High	Master Protein	Dlo_pri0255F.1_g01230.1	Dlo_pri0255F.1_g01230.1	0	17.553	8	5	7	5	754	84.5	5.02	129	5	0	0	0.737	0.918	0.842	1.246	1.143	0.917	1	1	1	1	1	1	114.4	84.3	105	96.3	2.8	6.17	3.54	4.95	High	High	High	High	High	High	High	High	High	High	High	High
FALSE	High	Master Protein	Dlo_pri0073F.1_g02440.1	Dlo_pri0073F.1_g02440.1	0	12.533	30	2	7	2	84	9.2	9.99	206	2	0	0	0.85	0.942	0.826	1.107	0.971	0.877	1	1	1	1	1	1	110.6	94	104.1	91.3	2.87	5.91	1.05	2.61	High	High	High	High	High	High	High	High	High	High	High	High
FALSE	High	Master Protein	Dlo_pri0024F.1_g02600.1	Dlo_pri0024F.1_g02600.1	0	17.292	5	5	7	5	1133	128.6	8.02	124	5	0	0	0.94	0.982	0.916	1.045	0.975	0.933	1	1	1	1	1	1	104.2	97.9	102.3	95.5	1.92	3.55	3.45	2.16	High	High	Not Found	High	High	Not Found	High	High	Not Found	High	High	Not Found
FALSE	High	Master Protein	Dlo_pri0046F.1_g02680.1	Dlo_pri0046F.1_g02680.1	0	15.75	26	4	7	3	188	19.7	9.44	133	4	0	0	0.97	0.999	0.976	1.03	1.006	0.977	1	1	1	1	1	1	101.4	98.4	101.3	98.9	3.28	10.07	2.24	11.08	High	High	High	High	High	High	High	High	High	High	High	High
FALSE	High	Master Protein	Dlo_pri0187F.1_g00340.1	Dlo_pri0187F.1_g00340.1	0	16.51	9	3	7	3	400	43.8	5.17	233	3	0	0	1.219	1.165	1.422	0.956	1.167	1.221	1	1	1	1	1	1	83.2	101.4	97	118.4	8.26	2.92	5.28	0.7	High	High	High	High	High	High	High	High	High	High	High	High
FALSE	High	Master Protein	Dlo_pri0773F.1_g00430.1	Dlo_pri0773F.1_g00430.1	0	18.224	16	3	7	3	306	33.9	6.1	139	3	0	0	1.372	1.096	1.182	0.799	0.862	1.078	1	1	1	1	1	1	86	118	94.3	101.7	3.51	1.46	4.79	3.47	High	High	High	High	High	High	High	High	High	High	High	High
FALSE	High	Master Protein	Dlo_pri0572F.1_g00290.1	Dlo_pri0572F.1_g00290.1	0	8.933	8	2	7	2	336	37.2	6.15	211	2	0	0	0.871	1.157	0.954	1.328	1.095	0.825	1	1	1	1	1	1	100.4	87.5	116.2	95.8	10	23.08	7.33	3.31	High	High	High	High	High	High	High	High	High	High	High	High
FALSE	High	Master Protein	Dlo_pri0060F.1_g01760.1	Dlo_pri0060F.1_g01760.1	0	12.993	11	4	7	4	380	42	5.69	170	4	0	0	0.962	1.057	0.923	1.099	0.96	0.873	1	1	1	1	1	1	101.5	97.6	107.3	93.7	10.41	9.98	0.89	0.88	High	High	High	High	High	High	High	High	High	High	High	High
FALSE	High	Master Protein	Dlo_pri0772F.1_g00400.1	Dlo_pri0772F.1_g00400.1	0	17.669	14	3	7	2	307	34.1	6.15	206	3	0	0	0.753	1.04	0.859	1.381	1.141	0.826	1	1	1	1	1	1	109.5	82.5	113.9	94.1	4.82	2.61	4.09	1.89	High	High	High	High	High	High	High	High	High	High	High	High
FALSE	High	Master Protein	Dlo_pri0128F.1_g01730.1	Dlo_pri0128F.1_g01730.1	0	21.106	14	4	7	4	302	33.5	8.12	152	4	0	0	0.88	1.077	0.934	1.224	1.062	0.868	1	1	1	1	1	1	102.8	90.4	110.7	96.1	3	0.56	2.92	3.98	High	High	High	High	High	High	High	High	High	High	High	High
FALSE	High	Master Protein	Dlo_pri0196F.1_g01110.1	Dlo_pri0196F.1_g01110.1	0	15.89	14	3	7	3	304	32.4	9.32	176	3	0	0	0.991	1.246	0.929	1.257	0.937	0.746	1	1	1	1	1	1	96	95.2	119.6	89.2	0.35	3.81	5.21	6.94	High	High	High	High	High	High	High	High	High	High	High	High
FALSE	High	Master Protein	Dlo_pri0039F.1_g00320.1	Dlo_pri0039F.1_g00320.1	0	25.798	15	5	7	5	473	51.8	7.42	199	5	0	0	1.1	0.984	0.919	0.894	0.835	0.934	1	1	1	1	1	1	99.9	110	98.3	91.8	6.07	8.24	5.62	4.27	High	High	High	High	High	High	High	High	High	High	High	High
FALSE	High	Master Protein	Dlo_pri0360F.1_g00760.1	Dlo_pri0360F.1_g00760.1	0	22.578	8	4	7	4	587	65.3	4.97	194	4	0	0	0.943	1.028	1.05	1.089	1.113	1.022	1	1	1	1	1	1	99.5	93.8	102.2	104.4	3.82	5.32	1.51	0.34	High	High	High	High	High	High	High	High	High	High	High	High
FALSE	High	Master Protein	Dlo_pri0088F.1_g00940.1	Dlo_pri0088F.1_g00940.1	0	5.631	5	2	7	1	322	35.1	5.48	91	2	0	0	0.846	0.917	0.83	1.084	0.981	0.905							111.3	94.2	102.1	92.4					Not Found	High	Not Found	Not Found	High	Not Found	Not Found	High	Not Found	Not Found	High	Not Found
FALSE	High	Master Protein	Dlo_pri0045F.1_g04560.1	Dlo_pri0045F.1_g04560.1	0	16.907	19	4	7	4	249	27.9	5.25	134	4	0	0	0.987	0.869	0.995	0.881	1.009	1.145	1	1	1	1	1	1	103.8	102.5	90.3	103.4	1.1	2.07	1.87	0.68	High	High	High	High	High	High	High	High	High	High	High	High
FALSE	High	Master Protein	Dlo_pri0093F.1_g03910.1	Dlo_pri0093F.1_g03910.1	0	10.946	5	3	7	3	576	66.4	6.93	201	3	0	0	1.012	0.976	1.131	0.964	1.117	1.159	1	1	1	1	1	1	97.1	98.3	94.8	109.8	1.81	0.61	0.63	1.38	High	High	High	High	High	High	High	High	High	High	High	High
FALSE	High	Master Protein	Dlo_pri0028F.1_g01180.1	Dlo_pri0028F.1_g01180.1	0	13.679	8	4	7	3	563	60.5	6.32	147	4	0	0	1.052	1.011	1.023	0.962	0.973	1.011	1	1	1	1	1	1	97.9	102.9	99	100.1	1.48	0.46	3.94	4.87	High	High	Not Found	High	High	Not Found	High	High	Not Found	High	High	Not Found
FALSE	High	Master Protein	Dlo_pri0151F.1_g00530.1	Dlo_pri0151F.1_g00530.1	0	21.91	13	4	7	4	325	36.9	9.29	149	4	0	0	1.122	1.055	0.89	0.94	0.793	0.844	1	1	1	1	1	1	98.4	110.3	103.7	87.5	1.07	2.74	0.14	2.14	High	High	High	High	High	High	High	High	High	High	High	High
FALSE	High	Master Protein	Dlo_pri0429F.1_g00420.1	Dlo_pri0429F.1_g00420.1	0	29.59	6	5	7	2	1019	111.5	6.87	214	5	0	0	0.871	1.116	0.872	1.282	1.001	0.781	1	1	1	1	1	1	103.6	90.3	115.7	90.4	1.14	3.56	4.78	3.87	High	Not Found	High	High	Not Found	High	High	Not Found	High	High	Not Found	High
FALSE	High	Master Protein	Dlo_pri0046F.1_g02560.1	Dlo_pri0046F.1_g02560.1	0	15.731	11	3	7	3	420	46.6	8.78	198	3	0	0	0.781	0.954	0.95	1.221	1.216	0.996	1	1	1	1	1	1	108.5	84.8	103.5	103.1	1.32	4.15	8.54	10.19	High	High	High	High	High	High	High	High	High	High	High	High
FALSE	High	Master Protein	Dlo_pri0040F.1_g02760.1	Dlo_pri0040F.1_g02760.1	0	8.98	12	2	7	2	179	20.5	9.2	150	2	0	0	0.791	1.023	0.812	1.294	1.026	0.793	1	1	1	1	1	1	110.3	87.2	112.9	89.5	2.05	4.75	3.76	2.72	High	High	High	High	High	High	High	High	High	High	High	High
FALSE	High	Master Protein	Dlo_pri0055F.1_g04030.1	Dlo_pri0055F.1_g04030.1	0	17.762	11	3	7	3	440	46.7	8.84	142	3	0	0	0.901	1.01	1.154	1.121	1.281	1.143	1	1	1	1	1	1	98.4	88.7	99.4	113.6	2.77	8.15	6.37	3.7	High	High	High	High	High	High	High	High	High	High	High	High
FALSE	High	Master Protein	Dlo_pri0034F.1_g03140.1	Dlo_pri0034F.1_g03140.1	0	19.731	5	2	7	2	577	64.1	7.71	235	2	0	0	1.313	0.985	2.035	0.75	1.55	2.066	1	1	0.962632	1	1	0.707976	75	98.5	73.9	152.6	1.58	1.88	5.42	4	High	High	High	High	High	High	High	High	High	High	High	High
FALSE	High	Master Protein	Dlo_alt0150F-008-01.1_g00010.1	Dlo_alt0150F-008-01.1_g00010.1	0	18.093	8	5	7	5	641	69.8	6.64	183	5	0	0	1.047	0.943	1.08	0.9	1.031	1.146	1	1	1	1	1	1	98.3	102.9	92.6	106.1	3.95	2.48	2.89	2.87	High	High	High	High	High	High	High	High	High	High	High	High
FALSE	High	Master Protein	Dlo_pri0248F.1_g00250.1	Dlo_pri0248F.1_g00250.1	0	12.493	10	3	7	3	283	31.4	7.55	122	3	0	0	0.911	1.367	0.908	1.5	0.996	0.664	1	1	1	1	1	1	95.6	87.1	130.6	86.7	1.91	2.84	4.07	3.27	High	High	High	High	High	High	High	High	High	High	High	High
FALSE	High	Master Protein	Dlo_pri0032F.1_g03250.1	Dlo_pri0032F.1_g03250.1	0	16.329	8	4	7	4	546	61.4	6.81	201	4	0	0	0.906	0.896	0.884	0.988	0.975	0.987	1	1	1	1	1	1	108.5	98.4	97.2	95.9	1.86	5.1	7.25	2.56	High	High	High	High	High	High	High	High	High	High	High	High
FALSE	High	Master Protein	Dlo_pri0143F.1_g02450.1	Dlo_pri0143F.1_g02450.1	0	9.703	11	2	7	2	215	25.2	9.88	200	2	0	0	0.665	1.089	0.946	1.638	1.422	0.868	1	1	1	1	1	1	108.1	71.9	117.8	102.2	1.78	5.04	1.32	1.89	High	High	High	High	High	High	High	High	High	High	High	High
FALSE	High	Master Protein	Dlo_pri0084F.1_g03420.1	Dlo_pri0084F.1_g03420.1	0	21.792	13	4	7	3	305	32	9.04	153	4	0	0	0.889	0.876	1.382	0.986	1.555	1.577	1	1	1	1	1	1	96.4	85.7	84.5	133.3	1.82	2.01	5.07	5.82	High	Not Found	High	High	Not Found	High	High	Not Found	High	High	Not Found	High
FALSE	High	Master Protein	Dlo_pri0122F.1_g02610.1	Dlo_pri0122F.1_g02610.1	0	24.444	12	5	7	3	512	57.3	4.65	194	5	0	0	0.903	1.142	1.061	1.264	1.175	0.929	1	1	1	1	1	1	97.4	88	111.2	103.4	3.83	19.48	7.5	28.12	High	High	High	High	High	High	High	High	High	High	High	High
FALSE	High	Master Protein	Dlo_pri0016F.1_g05310.1	Dlo_pri0016F.1_g05310.1	0	17.722	10	4	7	4	487	53.9	6.83	161	4	0	0	1.294	0.927	1.135	0.716	0.877	1.224	1	1	1	1	1	1	91.8	118.8	85.1	104.2	2.75	4.09	6.19	0.85	High	High	High	High	High	High	High	High	High	High	High	High
FALSE	High	Master Protein	Dlo_pri0238F.1_g00830.1	Dlo_pri0238F.1_g00830.1	0	18.174	24	4	7	4	211	24.2	5.27	144	4	0	0	0.776	1.101	0.801	1.418	1.032	0.727	1	1	1	1	1	1	108.7	84.4	119.7	87.1	1.01	0.7	2.91	3.3	High	High	High	High	High	High	High	High	High	High	High	High
FALSE	High	Master Protein	Dlo_pri0063F.1_g03650.1	Dlo_pri0063F.1_g03650.1	0	18.215	28	3	7	3	79	9	7.65	174	3	0	0	1.309	1.004	1.016	0.767	0.776	1.012	0.561506	1	1	0.526465	0.825588	1	92.4	121	92.8	93.9	0.91	3.72	3.93	1.81	High	High	High	High	High	High	High	High	High	High	High	High
FALSE	High	Master Protein	Dlo_alt0015F-016-01.1_g00030.1	Dlo_alt0015F-016-01.1_g00030.1	0	14.262	8	3	7	3	410	45.4	9.01	169	3	0	0	1.004	0.93	1.199	0.927	1.195	1.289	1	1	1	1	1	1	96.8	97.1	90	116.1	2.67	0.43	5.89	6.3	High	High	High	High	High	High	High	High	High	High	High	High
FALSE	High	Master Protein	Dlo_pri0199F.1_g00500.1	Dlo_pri0199F.1_g00500.1	0	13.603	10	3	7	3	372	39	6.77	204	3	0	0	1.33	1.022	1.046	0.769	0.786	1.023	1	1	1	1	1	1	90.9	121	93	95.1	4.78	0.77	4.74	8.6	High	High	High	High	High	High	High	High	High	High	High	High
FALSE	High	Master Protein	Dlo_pri0133F.1_g00750.1	Dlo_pri0133F.1_g00750.1	0	8.196	5	2	7	2	435	46.1	5.74	186	2	0	0	1.042	0.999	1.027	0.959	0.986	1.028	1	1	1	1	1	1	98.3	102.4	98.2	101	1.46	2.25	1.46	0.51	High	High	High	High	High	High	High	High	High	High	High	High
FALSE	High	Master Protein	Dlo_pri0432F.1_g01570.1	Dlo_pri0432F.1_g01570.1	0	14.697	12	3	7	3	319	35.1	6.79	115	3	0	0	0.994	1.111	0.948	1.118	0.954	0.854	1	1	1	1	1	1	98.7	98.1	109.6	93.6	1.67	3.43	5.52	4.46	High	High	High	High	High	High	High	High	High	High	High	High
FALSE	High	Master Protein	Dlo_pri0018F.1_g00470.1	Dlo_pri0018F.1_g00470.1	0	14.812	21	3	7	3	175	19.9	4.65	148	3	0	0	1.108	1.247	0.943	1.126	0.851	0.756	1	1	1	1	1	1	93	103.1	116.1	87.8	1	2.96	0.33	2.92	High	High	High	High	High	High	High	High	High	High	High	High
FALSE	High	Master Protein	Dlo_pri0193F.1_g01760.1	Dlo_pri0193F.1_g01760.1	0	13.957	7	3	7	3	487	52.3	6.21	176	3	0	0	1.047	1.052	1.037	1.005	0.991	0.986	1	1	1	1	1	1	96.7	101.3	101.8	100.3	1.23	0.34	2.36	1.15	High	High	High	High	High	High	High	High	High	High	High	High
FALSE	High	Master Protein	Dlo_pri0006F.1_g03460.1	Dlo_pri0006F.1_g03460.1	0	18.111	14	4	7	4	365	41.8	8.12	198	4	0	0	1.178	1.109	1.047	0.941	0.889	0.945	1	1	1	1	1	1	92.3	108.7	102.3	96.6	0.29	0.39	1.27	1.41	High	High	High	High	High	High	High	High	High	High	High	High
FALSE	High	Master Protein	Dlo_alt0450F-001-01.1_g00060.1	Dlo_alt0450F-001-01.1_g00060.1	0	14.607	8	3	7	3	428	46.2	4.86	151	3	0	0	0.975	0.941	0.982	0.965	1.008	1.045	1	1	1	1	1	1	102.6	100	96.5	100.8	6.24	7.04	1.83	2.28	High	High	High	High	High	High	High	High	High	High	High	High
FALSE	High	Master Protein	Dlo_pri0225F.1_g00920.1	Dlo_pri0225F.1_g00920.1	0	9.864	12	2	7	2	228	26.2	6.25	188	2	0	0	0.515	0.821	0.542	1.593	1.051	0.66	1	1	1	1	1	1	139	71.6	114.1	75.3	11.42	18.1	8.06	13.9	High	High	High	High	High	High	High	High	High	High	High	High
FALSE	High	Master Protein	Dlo_pri0053F.1_g02480.1	Dlo_pri0053F.1_g02480.1	0	19.342	15	4	7	4	318	36	8.57	194	4	0	0	1.012	1.097	1.047	1.083	1.034	0.955	1	1	1	1	1	1	96.2	97.4	105.5	100.8	0.6	4.96	1.4	6.27	High	High	High	High	High	High	High	High	High	High	High	High
FALSE	High	Master Protein	Dlo_pri0229F.1_g01780.1	Dlo_pri0229F.1_g01780.1	0	18.038	11	4	7	4	516	54.8	5.82	154	4	0	0	1.105	0.98	1.034	0.887	0.935	1.055	1	1	1	1	1	1	97.1	107.3	95.2	100.4	1.2	0.8	5.64	4.89	High	High	High	High	High	High	High	High	High	High	High	High
FALSE	High	Master Protein	Dlo_pri0138F.1_g00400.1	Dlo_pri0138F.1_g00400.1	0	14.503	5	2	7	2	601	66.9	8.13	295	2	0	0	1.203	0.96	0.938	0.797	0.78	0.978	1	1	1	1	1	1	97.5	117.4	93.6	91.5	2.52	1.82	1.78	1.51	High	High	High	High	High	High	High	High	High	High	High	High
FALSE	High	Master Protein	Dlo_pri0246F.1_g00390.1	Dlo_pri0246F.1_g00390.1	0	18.06	14	4	7	4	390	42.8	5.76	149	4	0	0	0.695	0.76	0.836	1.093	1.202	1.099	1	1	1	1	1	1	121.5	84.5	92.4	101.6	10.18	5.78	6.29	13.9	High	High	High	High	High	High	High	High	High	High	High	High
FALSE	High	Master Protein	Dlo_pri0056F.1_g00710.1	Dlo_pri0056F.1_g00710.1	0	21.497	20	4	7	4	249	27.1	8.92	178	4	0	0	0.758	0.927	0.907	1.223	1.196	0.978	1	1	1	1	1	1	111.3	84.4	103.2	101	4.59	3.75	3.75	1.97	High	High	High	High	High	High	High	High	High	High	High	High
FALSE	High	Master Protein	Dlo_pri0024F.1_g03340.1	Dlo_pri0024F.1_g03340.1	0	20.661	29	4	7	4	143	16.5	8.65	146	4	0	0	1.183	1.047	1.162	0.885	0.982	1.11	1	1	1	1	1	1	91.1	107.7	95.4	105.8	0.19	1.36	0.52	0.75	High	High	High	High	High	High	High	High	High	High	High	High
FALSE	High	Master Protein	Dlo_pri0136F.1_g01800.1	Dlo_pri0136F.1_g01800.1	0	21.668	14	4	7	4	411	45.8	5.08	185	4	0	0	0.931	1.2	0.926	1.288	0.995	0.772	1	1	1	1	1	1	98.6	91.8	118.3	91.3	10.05	9.34	5.31	4.87	High	High	High	High	High	High	High	High	High	High	High	High
FALSE	High	Master Protein	Dlo_pri0064F.1_g00610.1	Dlo_pri0064F.1_g00610.1	0	25.708	11	3	7	2	413	44.5	6.76	254	3	0	0	1.835	1.102	1.47	0.6	0.801	1.334	1	1	1	1	1	1	74	135.8	81.5	108.7	3.25	1.19	2.56	1.1	High	High	High	High	High	High	High	High	High	High	High	High
FALSE	High	Master Protein	Dlo_pri0000F.1_g03540.1	Dlo_pri0000F.1_g03540.1	0	29.506	22	4	7	4	293	33.5	7.14	193	4	0	0	1.126	0.866	0.889	0.768	0.789	1.027	1	1	1	1	1	1	103.1	116.1	89.2	91.6	3.15	6.19	3.23	5.85	High	High	High	High	High	High	High	High	High	High	High	High
FALSE	High	Master Protein	Dlo_alt0045F-019-01.1_g00020.1	Dlo_alt0045F-019-01.1_g00020.1	0	12.737	10	3	7	2	347	36.3	9.09	174	3	0	1	1.092	0.938	0.98	0.859	0.897	1.045	1	1	1	1	1	1	99.7	108.9	93.5	97.8	8.12	10.5	2.39	2.74	High	High	Not Found	High	High	Not Found	High	High	Not Found	High	High	Not Found
FALSE	High	Master Protein	Dlo_pri0050F.1_g01700.1	Dlo_pri0050F.1_g01700.1	0	20.267	31	3	7	1	160	17.6	8.62	154	3	0	0	0.803	1.466	1.705	1.825	2.123	1.164							80.4	64.6	117.9	137.1					Not Found	High	Not Found	Not Found	High	Not Found	Not Found	High	Not Found	Not Found	High	Not Found
FALSE	High	Master Protein	Dlo_pri0454F.1_g00130.1	Dlo_pri0454F.1_g00130.1	0	12.935	11	3	7	3	328	36.2	6.64	174	3	0	0	1.129	1.178	1.125	1.043	0.996	0.954	1	1	1	1	1	1	90.2	101.9	106.4	101.5	1.92	7.64	9.71	9.44	High	High	High	High	High	High	High	High	High	High	High	High
FALSE	High	Master Protein	Dlo_pri0076F.1_g04060.1	Dlo_pri0076F.1_g04060.1	0	11.693	4	2	7	2	468	51.4	5.99	146	2	0	0	1.582	0.987	1.558	0.624	0.985	1.579	1	1	1	1	1	1	78	123.4	77	121.6	2.74	1.96	1.33	0.89	High	High	High	High	High	High	High	High	High	High	High	High
FALSE	High	Master Protein	Dlo_pri0103F.1_g01060.1	Dlo_pri0103F.1_g01060.1	0	24.45	35	4	7	1	172	19.5	7.46	215	4	0	0	0.713	1.269	1.552	1.78	2.176	1.223	1	1	1	1	1	1	88.2	62.9	112	136.9	1.82	1.36	0.12	1.7	High	High	High	High	High	High	High	High	High	High	High	High
FALSE	High	Master Protein	Dlo_pri0048F.1_g02960.1	Dlo_pri0048F.1_g02960.1	0	26.981	19	4	7	2	349	38.1	6.04	218	4	0	2	0.979	1.243	0.955	1.27	0.976	0.768	1	1	1	1	1	1	95.8	93.7	119.1	91.5	14.64	7.12	22.31	12.59	High	High	High	High	High	High	High	High	High	High	High	High
FALSE	High	Master Protein	Dlo_pri0024F.1_g03350.1	Dlo_pri0024F.1_g03350.1	0	11.375	9	2	7	2	301	33	5.4	288	2	0	0	2.105	0.945	1.985	0.449	0.943	2.101	1	1	1	1	1	1	66.3	139.5	62.6	131.5	3.31	2.78	4.17	3.65	High	High	High	High	High	High	High	High	High	High	High	High
FALSE	High	Master Protein	Dlo_pri0704F.1_g00090.1	Dlo_pri0704F.1_g00090.1	0	16.374	10	5	7	5	525	58.8	5.76	157	5	0	0	1.172	1.093	1.257	0.933	1.072	1.149	1	1	1	1	1	1	88.5	103.7	96.7	111.1	1.62	8.48	2.71	6.77	High	High	High	High	High	High	High	High	High	High	High	High
FALSE	High	Master Protein	Dlo_pri0000F.1_g01230.1	Dlo_pri0000F.1_g01230.1	0	16.484	13	4	7	2	325	35.9	6.04	186	4	0	2	1.265	0.992	1.22	0.784	0.965	1.23	1	1	1	1	1	1	89.3	113	88.6	109	4.11	3.43	2.47	3.3	High	High	High	High	High	High	High	High	High	High	High	High
FALSE	High	Master Protein	Dlo_pri0121F.1_g01160.1	Dlo_pri0121F.1_g01160.1	0	9.572	27	2	7	2	97	10.6	8.97	213	2	0	0	0.573	0.949	0.565	1.658	0.986	0.595	1	1	1	1	1	1	129.6	74.2	123	73.2	2.07	6.01	4.88	0.57	High	High	High	High	High	High	High	High	High	High	High	High
FALSE	High	Master Protein	Dlo_pri0033F.1_g02850.1	Dlo_pri0033F.1_g02850.1	0	17.713	10	4	7	4	465	52.6	6.7	188	4	0	0	0.955	0.773	0.914	0.81	0.957	1.182	1	1	1	1	1	1	109.8	104.9	84.9	100.4	1.48	1.27	4.47	2.13	High	High	High	High	High	High	High	High	High	High	High	High
FALSE	High	Master Protein	Dlo_pri0015F.1_g00930.1	Dlo_pri0015F.1_g00930.1	0	15.634	3	4	7	1	1038	116.1	6.79	171	4	0	0	1.181	1.07	1.32	0.906	1.118	1.234							87.5	103.4	93.6	115.5					Not Found	High	Not Found	Not Found	High	Not Found	Not Found	High	Not Found	Not Found	High	Not Found
FALSE	High	Master Protein	Dlo_pri0907F.1_g00070.1	Dlo_pri0907F.1_g00070.1	0	13.643	3	3	7	3	1118	126.6	8.4	143	3	0	0	1.11	0.943	1.045	0.85	0.942	1.108	1	1	1	1	1	1	97.6	108.3	92.1	102	3.42	4.99	2.38	1.95	High	High	High	High	High	High	High	High	High	High	High	High
FALSE	High	Master Protein	Dlo_pri0000F.1_g07800.1	Dlo_pri0000F.1_g07800.1	0	14.713	6	3	7	3	485	53	6.76	174	3	0	0	0.944	0.96	1.17	1.017	1.24	1.219	1	1	1	1	1	1	98.2	92.7	94.3	114.9	4.99	5.9	4.02	3.12	High	High	High	High	High	High	High	High	High	High	High	High
FALSE	High	Master Protein	Dlo_pri0055F.1_g01720.1	Dlo_pri0055F.1_g01720.1	0	15.165	14	4	7	4	346	38.8	6.46	169	4	0	0	0.982	0.977	1.089	0.995	1.11	1.115	1	1	1	1	1	1	98.8	97	96.5	107.7	9.06	15.43	5.05	0.41	High	High	High	High	High	High	High	High	High	High	High	High
FALSE	High	Master Protein	Dlo_pri0002F.1_g08760.1	Dlo_pri0002F.1_g08760.1	0	15.576	13	2	7	2	171	19.5	5.31	221	2	0	0	1.043	0.869	0.682	0.833	0.654	0.785	1	1	1	1	1	1	111.3	116.1	96.7	75.9	6.47	4.48	6.78	12.33	High	High	High	High	High	High	High	High	High	High	High	High
FALSE	High	Master Protein	Dlo_pri0948F.1_g00140.1	Dlo_pri0948F.1_g00140.1	0	24.765	15	4	7	1	374	41.1	8.05	291	4	0	0	1.102	1.097	0.962	0.996	0.873	0.876							96.1	105.9	105.5	92.5					High	High	Not Found	High	High	Not Found	High	High	Not Found	High	High	Not Found
FALSE	High	Master Protein	Dlo_pri0060F.1_g03750.1	Dlo_pri0060F.1_g03750.1	0	17.509	10	4	7	4	526	58.1	8.05	149	4	0	0	0.773	1.007	0.864	1.302	1.117	0.858	1	1	1	1	1	1	109.8	84.9	110.5	94.8	1.82	4.25	1.1	0.58	High	High	High	High	High	High	High	High	High	High	High	High
FALSE	High	Master Protein	Dlo_pri0138F.1_g00420.1	Dlo_pri0138F.1_g00420.1	0	19.559	7	3	7	3	514	56.8	7.55	171	3	0	0	1.818	0.923	1.502	0.508	0.826	1.628	1	1	1	0.834432	1	1	76.3	138.7	70.4	114.6	3.34	2.79	4.2	1.33	High	High	High	High	High	High	High	High	High	High	High	High
FALSE	High	Master Protein	Dlo_pri0151F.1_g01110.1	Dlo_pri0151F.1_g01110.1	0	17.433	8	4	7	4	709	80.3	8.02	159	4	0	0	0.866	0.95	0.955	1.098	1.103	1.005	1	1	1	1	1	1	106.1	91.8	100.8	101.3	2.12	8.12	3.4	3.96	High	High	High	High	High	High	High	High	High	High	High	High
FALSE	High	Master Protein	Dlo_pri0059F.1_g02710.1	Dlo_pri0059F.1_g02710.1	0	21.379	15	3	7	3	282	31.9	8.31	222	3	0	0	0.917	1.041	0.886	1.135	0.966	0.852	1	1	1	1	1	1	104.1	95.4	108.3	92.2	2.1	13.34	5.45	5.09	High	High	High	High	High	High	High	High	High	High	High	High
FALSE	High	Master Protein	Dlo_pri0074F.1_g02410.1	Dlo_pri0074F.1_g02410.1	0	17.619	6	4	7	1	634	69.9	9.06	131	4	0	0	0.89	1.128	0.822	1.267	0.924	0.729							104.2	92.7	117.5	85.6					High	Not Found	Not Found	High	Not Found	Not Found	High	Not Found	Not Found	High	Not Found	Not Found
FALSE	High	Master Protein	Dlo_pri0004F.1_g05060.1	Dlo_pri0004F.1_g05060.1	0	16.285	24	3	7	3	160	18.5	5.64	217	3	0	0	0.642	0.576	0.728	0.897	1.133	1.263	1	1	1	1	1	1	135.8	87.2	78.2	98.8	5.16	4.36	4.16	4.04	High	High	High	High	High	High	High	High	High	High	High	High
FALSE	High	Master Protein	Dlo_pri0099F.1_g02550.1	Dlo_pri0099F.1_g02550.1	0	14.083	25	3	7	3	147	16.6	8.16	180	3	0	0	0.937	1.032	0.85	1.101	0.907	0.824	1	1	1	1	1	1	104.8	98.1	108.1	89	2.21	2.95	5.44	3.23	High	High	High	High	High	High	High	High	High	High	High	High
FALSE	High	Master Protein	Dlo_pri0409F.1_g00360.1	Dlo_pri0409F.1_g00360.1	0	21.054	6	5	7	5	953	105.4	5.12	161	5	0	0	0.993	0.92	1.024	0.927	1.031	1.113	1	1	1	1	1	1	101.6	100.9	93.5	104	2.81	4.73	2.55	3.31	High	High	High	High	High	High	High	High	High	High	High	High
FALSE	High	Master Protein	Dlo_pri0300F.1_g00040.1	Dlo_pri0300F.1_g00040.1	0	25.282	12	6	7	6	609	66.7	8.53	185	6	0	0	0.957	0.897	0.892	0.937	0.932	0.994	1	1	1	1	1	1	106.8	102.2	95.8	95.2	7.6	3.21	3.59	2.06	High	High	High	High	High	High	High	High	High	High	High	High
FALSE	High	Master Protein	Dlo_pri0060F.1_g01060.1	Dlo_pri0060F.1_g01060.1	0	18.354	20	4	7	4	273	30.1	9.01	170	4	0	0	0.892	0.935	1.158	1.048	1.298	1.239	1	1	1	1	1	1	100.4	89.6	93.8	116.2	1.37	6.05	7.52	10.76	High	High	High	High	High	High	High	High	High	High	High	High
FALSE	High	Master Protein	Dlo_pri0004F.1_g04580.1	Dlo_pri0004F.1_g04580.1	0	10.064	12	3	7	3	266	28.7	8.78	138	3	0	0	0.888	0.912	0.96	1.028	1.082	1.053	1	1	1	1	1	1	106.4	94.4	97	102.2	5.18	3.42	2.74	0.77	High	High	High	High	High	High	High	High	High	High	High	High
FALSE	High	Master Protein	Dlo_alt0042F-002-01.1_g00120.1	Dlo_alt0042F-002-01.1_g00120.1	0	11.065	5	2	7	2	330	34.7	5.21	148	2	0	0	1.091	0.97	0.968	0.89	0.887	0.997	1	1	1	1	1	1	99.3	108.3	96.4	96.1	2.69	2.02	1.81	3.22	High	High	High	High	High	High	High	High	High	High	High	High
FALSE	High	Master Protein	Dlo_pri0255F.1_g01790.1	Dlo_pri0255F.1_g01790.1	0	15.376	10	3	7	3	413	45.8	8.12	223	3	0	0	0.872	0.952	0.823	1.092	0.944	0.864	1	1	1	1	1	1	109.7	95.6	104.4	90.2	0.63	5.61	5.56	1.28	High	High	High	High	High	High	High	High	High	High	High	High
FALSE	High	Master Protein	Dlo_pri0061F.1_g02080.1	Dlo_pri0061F.1_g02080.1	0	17.136	11	4	7	4	491	52.8	5.58	172	4	0	0	0.463	0.81	0.573	1.748	1.236	0.707	1	1	1	1	1	1	140.5	65.1	113.8	80.5	6.47	8	8.97	2.78	High	High	High	High	High	High	High	High	High	High	High	High
FALSE	High	Master Protein	Dlo_pri0261F.1_g00310.1	Dlo_pri0261F.1_g00310.1	0	25.295	6	6	7	6	1022	115.1	6.18	159	6	0	0	0.887	0.979	0.93	1.104	1.049	0.95	1	1	1	1	1	1	105.4	93.4	103.1	98	2.29	6.28	2.22	6.1	High	High	Not Found	High	High	Not Found	High	High	Not Found	High	High	Not Found
FALSE	High	Master Protein	Dlo_alt0146F-008-01.1_g00030.1	Dlo_alt0146F-008-01.1_g00030.1	0	20.474	6	3	7	2	602	68	9.2	160	3	0	0	0.721	1.003	0.873	1.391	1.212	0.871	1	1	1	1	1	1	111.2	80.2	111.5	97.1	3.59	4.1	2.39	4.76	Not Found	High	High	Not Found	High	High	Not Found	High	High	Not Found	High	High
FALSE	High	Master Protein	Dlo_pri0053F.1_g01100.1	Dlo_pri0053F.1_g01100.1	0	29.379	18	4	7	4	313	34.5	8.13	209	4	0	0	0.953	0.903	0.962	0.947	1.01	1.066	1	1	1	1	1	1	104.8	99.8	94.6	100.8	1.34	7.47	10.58	6.26	High	High	High	High	High	High	High	High	High	High	High	High
FALSE	High	Master Protein	Dlo_pri0134F.1_g00540.1	Dlo_pri0134F.1_g00540.1	0	9.957	7	4	7	4	476	51.6	5.11	112	4	0	0	0.741	1.027	0.832	1.386	1.122	0.81	1	1	1	1	1	1	111.1	82.3	114.1	92.4	1.54	2.58	3.76	2.34	High	High	High	High	High	High	High	High	High	High	High	High
FALSE	High	Master Protein	Dlo_pri0026F.1_g02670.1	Dlo_pri0026F.1_g02670.1	0	13.471	4	3	7	2	853	96.6	6.05	128	3	0	1	1.127	0.956	1.067	0.848	0.947	1.117	1	1	1	1	1	1	96.4	108.6	92.1	102.9	5.7	4.05	5.47	6.43	High	High	High	High	High	High	High	High	High	High	High	High
FALSE	High	Master Protein	Dlo_pri0502F.1_g00440.1	Dlo_pri0502F.1_g00440.1	0	16.465	13	4	7	4	365	39.4	6.38	234	4	0	0	0.908	1.071	0.86	1.18	0.947	0.803	1	1	1	1	1	1	104.2	94.6	111.6	89.6	3.2	2.02	1.91	7.45	High	High	High	High	High	High	High	High	High	High	High	High
FALSE	High	Master Protein	Dlo_pri0039F.1_g01030.1	Dlo_pri0039F.1_g01030.1	0	26.293	23	5	7	5	290	31.8	6.52	162	5	0	0	1.011	0.952	1.022	0.942	1.011	1.073	1	1	1	1	1	1	100.4	101.4	95.6	102.6	2.34	4.89	6.25	4.2	High	High	High	High	High	High	High	High	High	High	High	High
FALSE	High	Master Protein	Dlo_pri0015F.1_g00280.1	Dlo_pri0015F.1_g00280.1	0	14.599	3	3	7	3	1202	131.2	6.74	166	3	0	0	0.926	0.974	0.993	1.051	1.072	1.02	1	1	1	1	1	1	102.8	95.2	100	102	0.27	4.42	9.37	7.33	High	High	High	High	High	High	High	High	High	High	High	High
FALSE	High	Master Protein	Dlo_pri0071F.1_g02650.1	Dlo_pri0071F.1_g02650.1	0	13.618	7	3	7	3	490	53.7	8.92	192	3	0	0	1.05	1.662	2.186	1.582	2.081	1.315	1	1	0.54098	1	0.816541	1	67.8	71.2	112.7	148.2	2.51	4.84	1.84	0.5	High	High	High	High	High	High	High	High	High	High	High	High
FALSE	High	Master Protein	Dlo_pri0001F.1_g01440.1	Dlo_pri0001F.1_g01440.1	0	18.878	10	4	7	4	453	49.7	7.55	197	4	0	0	0.834	0.901	0.794	1.081	0.952	0.881	1	1	1	1	1	1	113.3	94.5	102.2	90	1.1	9.17	3.51	8.09	High	High	High	High	High	High	High	High	High	High	High	High
FALSE	High	Master Protein	Dlo_pri0103F.1_g01610.1	Dlo_pri0103F.1_g01610.1	0	14.598	9	3	7	3	399	43.4	7.83	216	3	0	0	0.657	1.108	1.067	1.687	1.625	0.963	1	1	1	1	1	1	104.4	68.6	115.7	111.4	4.52	5.98	4.96	9.48	High	High	High	High	High	High	High	High	High	High	High	High
FALSE	High	Master Protein	Dlo_pri0406F.1_g00170.1	Dlo_pri0406F.1_g00170.1	0	6.841	11	2	7	1	257	28.7	8.69	116	2	0	0	1.079	0.97	0.952	0.899	0.883	0.982							100	107.9	96.9	95.2					High	Not Found	Not Found	High	Not Found	Not Found	High	Not Found	Not Found	High	Not Found	Not Found
FALSE	High	Master Protein	Dlo_alt0089F-004-01.1_g00340.1	Dlo_alt0089F-004-01.1_g00340.1	0	16.279	5	2	7	2	568	63	8.54	237	2	0	0	0.722	1.08	0.611	1.496	0.846	0.566	1	1	1	1	1	1	117.2	84.6	126.6	71.6	1.5	0.77	0.96	4.53	High	High	High	High	High	High	High	High	High	High	High	High
FALSE	High	Master Protein	Dlo_pri0505F.1_g00450.1	Dlo_pri0505F.1_g00450.1	0	14.639	4	3	7	3	703	79.3	9.01	185	3	0	0	0.859	0.973	0.886	1.132	1.03	0.91	1	1	1	1	1	1	107.6	92.5	104.7	95.3	4.34	3.08	5	0.74	High	High	High	High	High	High	High	High	High	High	High	High
FALSE	High	Master Protein	Dlo_pri0016F.1_g04500.1	Dlo_pri0016F.1_g04500.1	0	14.255	41	4	7	4	115	13.4	8.4	172	4	0	0	0.927	1.087	0.89	1.173	0.96	0.819	1	1	1	1	1	1	102.4	95	111.4	91.2	2.66	2.59	5.38	4.11	High	High	High	High	High	High	High	High	High	High	High	High
FALSE	High	Master Protein	Dlo_pri0409F.1_g00990.1	Dlo_pri0409F.1_g00990.1	0	21.137	16	5	7	1	422	46.2	8.4	152	5	0	0	0.819	1.017	0.901	1.241	1.099	0.886							107	87.7	108.8	96.4					High	Not Found	Not Found	High	Not Found	Not Found	High	Not Found	Not Found	High	Not Found	Not Found
FALSE	High	Master Protein	Dlo_pri0106F.1_g00680.1	Dlo_pri0106F.1_g00680.1	0	14.187	11	3	7	3	347	37.7	6.19	197	3	0	0	1.168	1.109	1.215	0.949	1.04	1.095	1	1	1	1	1	1	89	104	98.8	108.2	12.13	3.57	3.66	2.95	High	High	High	High	High	High	High	High	High	High	High	High
FALSE	High	Master Protein	Dlo_pri0396F.1_g00020.1	Dlo_pri0396F.1_g00020.1	0	5.927	6	2	6	2	262	28.6	7.53	82	2	0	0	0.941	1.037	0.771	1.103	0.82	0.743	1	1	1	1	1	1	106.7	100.4	110.7	82.3	1.67	3.72	5.64	1.06	High	High	High	High	High	High	High	High	High	High	High	High
FALSE	High	Master Protein	Dlo_pri0185F.1_g00260.1	Dlo_pri0185F.1_g00260.1	0	18.93	7	3	6	3	696	79.5	6.48	122	3	0	0	0.915	1.092	1.037	1.193	1.133	0.95	1	1	1	1	1	1	98.9	90.5	108	102.6	8.6	13.87	10.38	4.11	High	High	High	High	High	High	High	High	High	High	High	High
FALSE	High	Master Protein	Dlo_pri0024F.1_g00160.1	Dlo_pri0024F.1_g00160.1	0	18.404	9	5	6	4	575	62.9	8.07	116	5	0	1	0.953	1.006	0.905	1.056	0.95	0.899	1	1	1	1	1	1	103.5	98.6	104.2	93.7	1.51	3.15	0.05	1.71	High	High	Not Found	High	High	Not Found	High	High	Not Found	High	High	Not Found
FALSE	High	Master Protein	Dlo_pri0048F.1_g02900.1	Dlo_pri0048F.1_g02900.1	0	15.204	6	4	6	4	601	65.8	9.31	152	4	0	0	0.771	1.122	0.887	1.456	1.151	0.791	1	1	1	1	1	1	105.8	81.6	118.8	93.9	2.52	7.52	5.66	3.56	High	High	High	High	High	High	High	High	High	High	High	High
FALSE	High	Master Protein	Dlo_pri0148F.1_g01190.1	Dlo_pri0148F.1_g01190.1	0	15.754	6	2	6	2	370	40.6	7.14	136	2	0	0	0.938	1.011	1.525	1.078	1.626	1.508	1	1	1	1	1	1	89.4	83.9	90.4	136.3	3.02	6.89	4.42	4.88	High	High	High	High	High	High	High	High	High	High	High	High
FALSE	High	Master Protein	Dlo_pri0046F.1_g03470.1	Dlo_pri0046F.1_g03470.1	0	15.175	5	3	6	3	751	84.9	5.8	198	3	0	0	0.484	0.905	0.757	1.871	1.563	0.836	1	1	1	1	1	1	127.1	61.5	115.1	96.2	2.29	4.55	4.58	2.19	High	High	High	High	High	High	High	High	High	High	High	High
FALSE	High	Master Protein	Dlo_pri0048F.1_g02430.1	Dlo_pri0048F.1_g02430.1	0	16.864	8	3	6	3	586	65	9.25	197	3	0	0	1.057	1.025	0.94	0.97	0.889	0.917	1	1	1	1	1	1	99.5	105.1	102	93.5	3.7	3.83	3.88	11.79	High	High	High	High	High	High	High	High	High	High	High	High
FALSE	High	Master Protein	Dlo_alt0144F-006-01.1_g00040.1	Dlo_alt0144F-006-01.1_g00040.1	0	14.315	4	4	6	4	933	103.5	7.59	127	4	0	0	1.013	0.941	0.869	0.929	0.858	0.924	1	1	1	1	1	1	104.6	106	98.5	90.9	13.82	15.25	8.31	0.61	High	High	High	High	High	High	High	High	High	High	High	High
FALSE	High	Master Protein	Dlo_pri0069F.1_g01760.1	Dlo_pri0069F.1_g01760.1	0	18.425	7	4	6	1	672	75.2	7.12	172	4	0	0	0.538	0.835	0.886	1.554	1.648	1.06	1	1	1	1	1	1	122.8	66	102.5	108.7	3.84	2.64	2.2	0.66	High	High	Not Found	High	High	Not Found	High	High	Not Found	High	High	Not Found
FALSE	High	Master Protein	Dlo_alt0218F-008-01.1_g00070.1	Dlo_alt0218F-008-01.1_g00070.1	0	14.924	14	3	6	2	245	26.2	6.44	154	3	0	0	1.091	1.041	0.965	0.954	0.885	0.927	1	1	1	1	1	1	97.6	106.5	101.6	94.2	1.71	0.69	1.64	0.78	High	Not Found	High	High	Not Found	High	High	Not Found	High	High	Not Found	High
FALSE	High	Master Protein	Dlo_pri0202F.1_g00970.1	Dlo_pri0202F.1_g00970.1	0	10.066	3	3	6	1	987	110.4	5.72	139	3	0	0	0.78	1.011	0.787	1.295	1.008	0.778	1	1	1	1	1	1	111.8	87.2	113	87.9	2.01	2.68	3.97	0.11	High	Not Found	High	High	Not Found	High	High	Not Found	High	High	Not Found	High
FALSE	High	Master Protein	Dlo_pri0318F.1_g01090.1	Dlo_pri0318F.1_g01090.1	0	11.77	4	3	6	3	750	82.9	5.77	136	3	0	0	0.979	1.139	0.991	1.164	1.013	0.87	1	1	1	1	1	1	97.3	95.3	110.9	96.5	4.41	5.58	6.9	5.64	High	High	High	High	High	High	High	High	High	High	High	High
FALSE	High	Master Protein	Dlo_pri0035F.1_g04010.1	Dlo_pri0035F.1_g04010.1	0	17.302	17	3	6	3	206	23.6	6.15	164	3	0	0	0.965	0.937	0.958	0.971	0.992	1.022	1	1	1	1	1	1	103.6	100	97.1	99.3	2.72	2.08	3.92	1.97	High	High	High	High	High	High	High	High	High	High	High	High
FALSE	High	Master Protein	Dlo_pri0062F.1_g04610.1	Dlo_pri0062F.1_g04610.1	0	17.774	14	3	6	3	344	37.5	5.85	172	3	0	0	1.127	0.968	1.052	0.858	0.933	1.087	1	1	1	1	1	1	96.4	108.7	93.3	101.5	2.47	4.82	2.24	2.01	High	High	High	High	High	High	High	High	High	High	High	High
FALSE	High	Master Protein	Dlo_alt0324F-002-01.1_g00020.1	Dlo_alt0324F-002-01.1_g00020.1	0	14.782	29	2	6	2	105	12.4	5.94	181	2	0	0	1.127	0.843	0.853	0.747	0.756	1.012	1	1	1	1	1	1	104.6	118	88.2	89.2	3.26	1.27	2.08	1.42	High	High	High	High	High	High	High	High	High	High	High	High
FALSE	High	Master Protein	Dlo_pri0046F.1_g02970.1	Dlo_pri0046F.1_g02970.1	0	12.323	4	2	6	1	535	60.4	8.25	132	2	0	0	1.184	1.206	1.582	1.018	1.336	1.312	1	1	1	1	1	1	80.4	95.3	97	127.3	4.27	0.45	5.14	0.88	High	Not Found	High	High	Not Found	High	High	Not Found	High	High	Not Found	High
FALSE	High	Master Protein	Dlo_pri0128F.1_g01630.1	Dlo_pri0128F.1_g01630.1	0	13.73	10	4	6	4	420	45.4	6.7	150	4	0	0	0.986	1.033	0.89	1.048	0.903	0.861	1	1	1	1	1	1	102.3	100.9	105.7	91.1	5.68	2.73	8.21	7.38	High	High	High	High	High	High	High	High	High	High	High	High
FALSE	High	Master Protein	Dlo_pri0072F.1_g00030.1	Dlo_pri0072F.1_g00030.1	0	13.413	18	3	6	3	178	20.2	10.15	155	3	0	0	0.769	1.064	0.998	1.384	1.298	0.938	1	1	1	1	1	1	104.4	80.3	111.1	104.2	3.92	18.81	8.15	3.06	High	High	High	High	High	High	High	High	High	High	High	High
FALSE	High	Master Protein	Dlo_pri1195F.1_g00230.1	Dlo_pri1195F.1_g00230.1	0	9.957	8	2	6	2	286	31.7	8.92	124	2	0	0	1.027	0.972	0.953	0.946	0.928	0.981	1	1	1	1	1	1	101.2	103.9	98.4	96.5	5.31	17.75	8.37	18.97	High	High	High	High	High	High	High	High	High	High	High	High
FALSE	High	Master Protein	Dlo_pri0006F.1_g06210.1	Dlo_pri0006F.1_g06210.1	0	15.766	44	3	6	2	108	12.2	5.05	187	3	0	0	0.879	0.92	1.003	1.047	1.142	1.091	1	1	1	1	1	1	105.2	92.5	96.8	105.6	6.27	8.11	6.99	4.67	High	High	High	High	High	High	High	High	High	High	High	High
FALSE	High	Master Protein	Dlo_pri0024F.1_g04690.1	Dlo_pri0024F.1_g04690.1	0	18.862	18	4	6	4	268	29.3	8.6	130	4	0	0	1.213	0.957	1.039	0.789	0.856	1.085	1	1	1	1	1	1	95	115.3	91	98.7	9.5	4.48	10.25	7.55	High	High	High	High	High	High	High	High	High	High	High	High
FALSE	High	Master Protein	Dlo_pri0070F.1_g00660.1	Dlo_pri0070F.1_g00660.1	0	13.696	15	3	6	3	211	24.2	9.55	166	3	0	0	0.941	0.903	0.92	0.96	0.977	1.018	1	1	1	1	1	1	106.3	100	96	97.7	6.18	5.75	0.78	1.53	High	High	High	High	High	High	High	High	High	High	High	High
FALSE	High	Master Protein	Dlo_pri0015F.1_g04320.1	Dlo_pri0015F.1_g04320.1	0	7.897	9	2	6	2	317	35.7	6.38	135	2	0	0	0.945	0.818	0.925	0.865	0.979	1.131	1	1	1	1	1	1	108.5	102.5	88.7	100.3	1	4.7	6.97	5.26	High	High	High	High	High	High	High	High	High	High	High	High
FALSE	High	Master Protein	Dlo_pri0196F.1_g00710.1	Dlo_pri0196F.1_g00710.1	0	15.001	4	4	6	4	895	99.3	5.49	118	4	0	0	1.387	1.058	0.823	0.763	0.594	0.778	1	1	1	1	1	1	93.7	130	99.1	77.2	5.47	9.67	1.31	7.88	High	High	High	High	High	High	High	High	High	High	High	High
FALSE	High	Master Protein	Dlo_pri0389F.1_g01050.1	Dlo_pri0389F.1_g01050.1	0	7.986	3	2	6	2	658	73.1	8.43	145	2	0	0	1.31	1.103	1.585	0.842	1.209	1.436	1	1	1	1	1	1	80	104.9	88.3	126.8	4.14	5.67	1.13	3.14	High	High	High	High	High	High	High	High	High	High	High	High
FALSE	High	Master Protein	Dlo_pri0183F.1_g00800.1	Dlo_pri0183F.1_g00800.1	0	16.296	11	3	6	3	340	36.4	7.3	186	3	0	0	2.032	1.125	1.193	0.554	0.587	1.06	1	1	1	1	1	1	74.8	151.9	84.1	89.2	3.84	2.49	4.07	5.66	High	High	High	High	High	High	High	High	High	High	High	High
FALSE	High	Master Protein	Dlo_pri0077F.1_g02870.1	Dlo_pri0077F.1_g02870.1	0	14.046	16	3	6	3	323	33.6	5.67	121	3	0	0	0.809	1.578	0.819	1.951	1.013	0.519	1	1	1	1	1	1	95.1	76.9	150.1	77.9	16.41	19.22	25.03	9.64	High	High	High	High	High	High	High	High	High	High	High	High
FALSE	High	Master Protein	Dlo_pri0078F.1_g01200.1	Dlo_pri0078F.1_g01200.1	0	17.398	9	2	6	2	234	24.4	6.16	161	2	0	0	1.66	1.034	1.324	0.623	0.797	1.281	1	1	1	1	1	1	79.7	132.4	82.4	105.5	4.36	7.03	11.15	0.58	High	High	High	High	High	High	High	High	High	High	High	High
FALSE	High	Master Protein	Dlo_pri0332F.1_g00330.1	Dlo_pri0332F.1_g00330.1	0	9.978	9	3	6	3	379	40.4	5.26	129	3	0	0	1.105	1.073	0.873	0.971	0.79	0.814	1	1	1	1	1	1	98.7	109.1	105.9	86.2	4.27	3	4.59	6.8	High	High	High	High	High	High	High	High	High	High	High	High
FALSE	High	Master Protein	Dlo_alt0023F-013-01.1_g00030.1	Dlo_alt0023F-013-01.1_g00030.1	0	13.014	16	3	6	3	217	23.9	4.88	143	3	0	0	1.374	1.248	1.074	0.908	0.781	0.86	1	1	1	1	1	1	85.2	117.1	106.3	91.5	1.41	0.17	1.45	3.03	High	High	High	High	High	High	High	High	High	High	High	High
FALSE	High	Master Protein	Dlo_pri0668F.1_g00160.1	Dlo_pri0668F.1_g00160.1	0	9.972	6	2	6	2	646	72.6	6.4	158	2	0	0	1.915	1.153	2.292	0.602	1.197	1.987	1	1	1	1	1	1	62.9	120.4	72.5	144.1	13.21	8.28	6.77	5	High	High	High	High	High	High	High	High	High	High	High	High
FALSE	High	Master Protein	Dlo_pri0001F.1_g10320.1	Dlo_pri0001F.1_g10320.1	0	14.108	21	2	6	2	109	12.4	6.99	157	2	0	0	0.857	0.944	0.954	1.101	1.113	1.011	1	1	1	1	1	1	106.5	91.3	100.5	101.6	6.04	2.78	10.26	2.66	High	High	High	High	High	High	High	High	High	High	High	High
FALSE	High	Master Protein	Dlo_pri0158F.1_g01620.1	Dlo_pri0158F.1_g01620.1	0	25.592	15	5	6	5	471	50.8	7.46	156	5	0	0	0.703	0.964	0.568	1.371	0.808	0.589	1	1	1	1	1	1	123.7	86.9	119.2	70.2	5.46	8.03	5.16	14.03	High	High	High	High	High	High	High	High	High	High	High	High
FALSE	High	Master Protein	Dlo_pri0024F.1_g04530.1	Dlo_pri0024F.1_g04530.1	0	12.314	7	3	6	3	507	56.5	5.94	143	3	0	0	1.02	1.002	0.956	0.981	0.937	0.954	1	1	1	1	1	1	100.6	102.6	100.7	96.1	3.49	18.22	15.65	4.24	High	High	High	High	High	High	High	High	High	High	High	High
FALSE	High	Master Protein	Dlo_pri0215F.1_g00270.1	Dlo_pri0215F.1_g00270.1	0	19.035	13	3	6	3	436	47.7	5.81	200	3	0	0	1.488	0.954	1.413	0.641	0.95	1.482	1	1	1	0.913426	1	1	82.4	122.6	78.6	116.4	0.68	2.96	1.31	1.84	High	High	High	High	High	High	High	High	High	High	High	High
FALSE	High	Master Protein	Dlo_pri0001F.1_g00020.1	Dlo_pri0001F.1_g00020.1	0	21.652	8	4	6	4	567	62.6	6.1	143	4	0	0	0.891	0.911	0.948	1.023	1.065	1.041	1	1	1	1	1	1	106.7	95	97.2	101.2	8.46	6.3	4.76	5.65	High	High	High	High	High	High	High	High	High	High	High	High
FALSE	High	Master Protein	Dlo_pri0150F.1_g01860.1	Dlo_pri0150F.1_g01860.1	0	15.63	8	4	6	4	543	62.6	5.67	125	4	0	0	0.803	1.028	0.887	1.28	1.104	0.863	1	1	1	1	1	1	107.6	86.4	110.6	95.4	1.63	6.26	5.02	2.78	High	High	High	High	High	High	High	High	High	High	High	High
FALSE	High	Master Protein	Dlo_pri0143F.1_g00820.1	Dlo_pri0143F.1_g00820.1	0	17.101	31	3	6	1	143	15.1	10.52	139	3	0	0	1.885	1.03	1.033	0.547	0.548	1.003	1	1	1	1	1	1	80.8	152.4	83.3	83.5	7.82	5.89	8.88	12	High	Not Found	High	High	Not Found	High	High	Not Found	High	High	Not Found	High
FALSE	High	Master Protein	Dlo_pri0342F.1_g00700.1	Dlo_pri0342F.1_g00700.1	0	15.49	14	2	6	2	266	29.4	7.74	250	2	0	0	1.269	1.277	0.655	1.006	0.516	0.513	1	1	1	1	1	1	95.2	120.8	121.6	62.4	8.81	14.09	8.46	11.94	High	High	High	High	High	High	High	High	High	High	High	High
FALSE	High	Master Protein	Dlo_pri0028F.1_g03290.1	Dlo_pri0028F.1_g03290.1	0	7.532	6	2	6	2	279	29.8	5	149	2	0	0	1.074	0.874	0.76	0.814	0.707	0.869	1	1	1	1	1	1	107.9	115.9	94.3	81.9	4.96	3.47	0.22	2.26	High	High	High	High	High	High	High	High	High	High	High	High
FALSE	High	Master Protein	Dlo_pri1861F.1_g00080.1	Dlo_pri1861F.1_g00080.1	0	16.554	34	4	6	4	136	15	6.67	154	4	0	0	1.122	1.105	1.04	0.985	0.926	0.941	1	1	1	1	1	1	93.7	105.2	103.6	97.5	1.66	1.85	2.55	4.19	High	High	High	High	High	High	High	High	High	High	High	High
[truncated: 798 more rows]
[truncated: 2 more columns]
