# Supplementary material for: Investigating phenotypic relationships in persimmon accessions through integrated proteomic and metabolomic analysis of corresponding fruits
Source: Front Plant Sci. 2023 Jan 30;14:1093074. doi: 10.3389/fpls.2023.1093074 (PMC9923171; doi:10.3389/fpls.2023.1093074)
Supplement: Supplementary file 4 [file Table_3.xlsx]

## Sheet: 102 tabella pvalue 0.01 FC 1.2P
Checked	Protein FDR Confidence: Combined	Master	Accession	Exp. q-value: Combined	Sum PEP Score	Coverage [%]	# Peptides	# PSMs	# Unique Peptides	# AAs	MW [kDa]	calc. pI	Score Mascot: Mascot	# Peptides (by Search Engine): Mascot	# Protein Pathway Groups	# Razor Peptides	Abundance Ratio: (Kaki tipo) / (cioccolatino)	Abundance Ratio: (lampadina) / (cioccolatino)	Abundance Ratio: (vaniglia) / (cioccolatino)	Abundance Ratio: (lampadina) / (Kaki tipo)	Abundance Ratio: (vaniglia) / (Kaki tipo)	Abundance Ratio: (vaniglia) / (lampadina)	Abundance Ratio P-Value: (Kaki tipo) / (cioccolatino)	Abundance Ratio P-Value: (lampadina) / (cioccolatino)	Abundance Ratio P-Value: (vaniglia) / (cioccolatino)	Abundance Ratio P-Value: (lampadina) / (Kaki tipo)	Abundance Ratio P-Value: (vaniglia) / (Kaki tipo)	Abundance Ratio P-Value: (vaniglia) / (lampadina)	Abundance Ratio Adj. P-Value: (Kaki tipo) / (cioccolatino)	Abundance Ratio Adj. P-Value: (lampadina) / (cioccolatino)	Abundance Ratio Adj. P-Value: (vaniglia) / (cioccolatino)	Abundance Ratio Adj. P-Value: (lampadina) / (Kaki tipo)	Abundance Ratio Adj. P-Value: (vaniglia) / (Kaki tipo)	Abundance Ratio Adj. P-Value: (vaniglia) / (lampadina)	Abundances (Grouped): cioccolatino	Abundances (Grouped): Kaki tipo	Abundances (Grouped): lampadina	Abundances (Grouped): vaniglia	Abundances (Grouped) CV [%]: cioccolatino	Abundances (Grouped) CV [%]: Kaki tipo	Abundances (Grouped) CV [%]: lampadina	Abundances (Grouped) CV [%]: vaniglia	Found in Sample: [S1] F1: 126, Sample, cioccolatino	Found in Sample: [S2] F2: 126, Sample, cioccolatino	Found in Sample: [S3] F3: 126, Sample, cioccolatino	Found in Sample: [S6] F1: 129, Sample, Kaki tipo	Found in Sample: [S9] F2: 129, Sample, Kaki tipo	Found in Sample: [S12] F3: 129, Sample, Kaki tipo	Found in Sample: [S5] F1: 128, Sample, lampadina
TRUE	High	Master Protein	Dlo_pri0046F.1_g00570.1	0	25.113	10	5	12	3	568	62.9	8.84	270	5	0	0	0.766	0.691	0.602	0.902	0.786	0.871	0.029397	0.002084	0.000229605	0.23336	0.0116411	0.209539	0.680485	0.274215	0.052031	1	0.579224	1	130.8	100.1	90.4	78.7	6.64	4.44	6.76	2.21	High	High	High	High	High	High	High
TRUE	High	Master Protein	Dlo_pri0149F.1_g00060.1	0	11.983	20	2	3	2	142	15.9	8.82	62	2	0	0	1.198	1.038	1.052	0.866	0.878	1.014	0.0085238	0.562101	0.350773	0.0195365	0.0276945	0.950985	0.321931	1	1	0.48591	0.862336	1	93.3	111.8	96.8	98.2	0.78	2.2	3.48	0.18	High	Not Found	High	High	Not Found	High	High
FALSE	High	Master Protein	Dlo_alt0004F-024-01.1_g00140.1	0	14.39	11	3	6	3	431	46.1	9.13	170	3	0	0	0.976	0.849	1.373	0.87	1.407	1.617	0.972058	0.131009	0.003704	0.23455	0.0022464	0.000263428	1	1	0.228918	1	0.176212	0.0335789	95.3	93	80.9	130.8	1.53	1.6	1.53	0.67	High	High	High	High	High	High	High
FALSE	High	Master Protein	Dlo_alt0369F-003-01.1_g00280.1	0	23.797	11	3	10	1	425	46	7.74	317	3	0	0	1.14	1.227	1.145	1.076	1.004	0.933	0.0117671	0.00102479	0.0126127	0.24327	0.999942	0.22691	0.400286	0.188027	0.44351	1	1	1	88.7	101.1	108.7	101.5	4.2	0.82	2.31	2.2	High	High	High	High	High	High	High
FALSE	High	Master Protein	Dlo_alt0613F-003-01.1_g00120.1	0	10.001	6	2	4	2	353	39.5	8.13	134	2	0	0	1.279	1.153	1.004	0.902	0.785	0.871	0.00125458	0.024203	0.976493	0.151954	0.00195626	0.0422792	0.108882	1	1	1	0.159592	0.879883	90.2	115.3	104	90.6	2.99	0.86	2.12	0.92	High	High	High	High	High	High	High
FALSE	High	Master Protein	Dlo_alt0788F-001-01.1_g00070.1	0	8.158	6	2	6	2	325	36.4	6.32	183	2	0	0	1.323	1.185	1.412	0.896	1.067	1.191	0.0216123	0.164626	0.00601303	0.504199	0.764495	0.147391	0.561506	1	0.284996	1	1	1	81.3	107.6	96.4	114.8	0.45	1.36	0.59	1.04	High	High	High	High	High	High	High
FALSE	High	Master Protein	Dlo_alt0990F-001-01.1_g00020.1	0	389.933	77	20	786	9	265	28.7	7.78	25788	20	0	21	1.828	1.169	1.982	0.639	1.084	1.696	3.94462e-09	4.23291e-05	1.62715e-09	2.29739e-08	0.0118294	1.08878e-08	1.60901e-05	0.0191845	2.21238e-06	1.56184e-05	0.579224	2.22057e-05	66.9	122.3	78.2	132.6	0.83	2.94	2.05	1.84	High	High	High	High	High	High	High
FALSE	High	Master Protein	Dlo_pri0001F.1_g01390.1	0	5.455	6	2	4	2	299	34	7.12	85	2	0	0	3.357	0.914	3.143	0.272	0.936	3.439	0.0118104	0.973561	0.0159825	0.00688791	0.995456	0.00921404	0.400286	1	0.525746	0.230293	1	0.300673	47.5	159.6	43.4	149.4	14.3	5.28	17.12	4.32	High	High	High	High	High	High	High
FALSE	High	Master Protein	Dlo_pri0001F.1_g02250.1	0	26.738	7	5	11	5	785	86.3	5.85	213	5	0	0	1.038	1.046	1.641	1.008	1.581	1.568	0.997386	0.993997	0.000410639	0.999908	0.00049373	0.00052465	1	1	0.0669998	1	0.066345	0.0486535	84.7	87.8	88.6	138.9	1.17	5.62	6.24	7.71	High	High	High	High	High	High	High
FALSE	High	Master Protein	Dlo_pri0001F.1_g06240.1	0	78.506	39	14	35	5	480	53.1	7.03	1076	14	0	9	0.542	0.573	0.732	1.056	1.349	1.278	0.0058591	0.00984336	0.14078	0.975405	0.167422	0.288019	0.256981	0.757567	1	1	1	1	140.5	76.2	80.4	102.8	1.23	3.61	1.6	1.89	High	High	High	High	High	High	High
FALSE	High	Master Protein	Dlo_pri0002F.1_g01920.1	0	109.122	45	9	77	9	205	22.5	4.81	2092	9	0	0	2.006	1.087	1.296	0.542	0.646	1.192	1.32126e-07	0.178571	0.000296043	3.93623e-07	5.96065e-06	0.00329544	0.000107154	1	0.0575028	0.000133799	0.0027015	0.165952	74.2	148.9	80.7	96.2	1.81	1.09	0.58	0.39	High	High	High	High	High	High	High
FALSE	High	Master Protein	Dlo_pri0002F.1_g06040.1	0	8.455	4	2	4	2	542	60.3	6.6	118	2	0	0	0.61	0.843	0.738	1.383	1.21	0.875	0.00399585	0.422412	0.0484402	0.0327432	0.301639	0.42542	0.223154	1	1	0.681425	1	1	125.4	76.4	105.7	92.5	2.75	3.9	5.12	3.22	High	High	High	High	High	High	High
FALSE	High	Master Protein	Dlo_pri0002F.1_g07010.1	0	208.105	51	21	100	19	592	65.2	6.73	3193	21	0	2	1.756	0.993	1.263	0.566	0.719	1.272	0.00480136	0.999998	0.255112	0.00469382	0.0721228	0.24902	0.231103	1	1	0.182994	1	1	79.8	140.1	79.2	100.8	1.33	1.92	1.41	0.93	High	High	High	High	High	High	High
FALSE	High	Master Protein	Dlo_pri0004F.1_g05100.1	0	23.383	25	3	12	3	158	16.7	4.96	360	3	0	0	0.695	0.871	0.87	1.254	1.252	0.998	0.00372823	0.283458	0.287588	0.0478512	0.0470934	0.999999	0.217249	1	1	0.873622	1	1	116.4	80.9	101.4	101.3	1.12	2.63	0.19	0.78	High	High	High	High	High	High	High
FALSE	High	Master Protein	Dlo_pri0004F.1_g05480.1	0	97.702	25	13	35	13	779	84.1	8.56	997	13	0	0	1.694	1.343	1.366	0.793	0.806	1.017	0.00348671	0.12249	0.0659198	0.106273	0.195232	0.969791	0.212273	1	1	1	1	1	74	125.4	99.4	101.1	4.17	3.69	5.12	2.96	High	High	High	High	High	High	High
FALSE	High	Master Protein	Dlo_pri0004F.1_g07700.1	0	117.015	37	12	56	12	486	52.8	8.85	1683	12	0	0	1.075	0.859	0.874	0.799	0.813	1.018	0.495286	0.0733906	0.107817	0.0098167	0.0140338	0.992351	1	1	1	0.31283	0.629054	1	105.1	112.9	90.2	91.8	0.66	0.33	0.9	0.47	High	High	High	High	High	High	High
FALSE	High	Master Protein	Dlo_pri0006F.1_g04810.1	0	114.588	40	14	70	14	508	53.7	7.21	1965	14	0	0	1.154	0.923	1.007	0.8	0.873	1.091	0.0812901	0.340044	0.857115	0.0070762	0.241635	0.118702	1	1	1	0.234665	1	1	98	113	90.4	98.6	2.43	3.22	0.61	5.56	High	High	High	High	High	High	High
			Dlo_pri0006F.1_g04810.1	0	114.588	40	14	70	14	508	53.7	7.21	1965	14	0	0	1.154	0.923	1.007	0.8	0.873	1.091	0.0812901	0.340044	0.857115	0.0070762	0.241635	0.118702	1	1	1	0.234665	1	1	98	113	90.4	98.6	2.43	3.22	0.61	5.56	High	High	High	High	High	High	High
			Dlo_pri0006F.1_g04810.1	0	114.588	40	14	70	14	508	53.7	7.21	1965	14	0	0	1.154	0.923	1.007	0.8	0.873	1.091	0.0812901	0.340044	0.857115	0.0070762	0.241635	0.118702	1	1	1	0.234665	1	1	98	113	90.4	98.6	2.43	3.22	0.61	5.56	High	High	High	High	High	High	High
			Dlo_pri0006F.1_g04810.1	0	114.588	40	14	70	14	508	53.7	7.21	1965	14	0	0	1.154	0.923	1.007	0.8	0.873	1.091	0.0812901	0.340044	0.857115	0.0070762	0.241635	0.118702	1	1	1	0.234665	1	1	98	113	90.4	98.6	2.43	3.22	0.61	5.56	High	High	High	High	High	High	High
FALSE	High	Master Protein	Dlo_pri0009F.1_g01770.1	0	59.468	27	9	33	8	372	42.6	8.73	805	9	0	1	0.743	1.094	1.123	1.472	1.51	1.026	0.046372	0.788935	0.563956	0.0129577	0.00761733	0.975154	0.851172	1	1	0.388635	0.443873	1	101	75.1	110.5	113.4	0.67	4.62	1.93	1.97	High	High	High	High	High	High	High
FALSE	High	Master Protein	Dlo_pri0009F.1_g02500.1	0	16.303	11	3	13	2	273	29.8	8.32	282	3	0	1	0.98	1.101	0.914	1.123	0.932	0.83	0.993294	0.152956	0.189887	0.106328	0.268197	0.00709124	1	1	1	1	1	0.267826	100.1	98.1	110.2	91.5	1.26	3.27	3.54	2.05	High	High	High	High	High	High	High
FALSE	High	Master Protein	Dlo_pri0014F.1_g00230.1	0	19.75	12	4	12	3	379	41.1	6.52	326	4	0	1	1.297	0.697	0.938	0.537	0.723	1.346	0.10407	0.0292025	0.958815	0.00108573	0.0520157	0.058066	1	1	1	0.0681334	1	1	101.7	131.9	70.9	95.4	2.56	7.22	9.76	1.05	High	High	High	High	High	High	High
FALSE	High	Master Protein	Dlo_pri0015F.1_g01420.1	0	98.975	38	11	81	11	368	40.3	6.54	2291	11	0	0	1.147	1.638	1.596	1.428	1.391	0.974	0.0614779	1.83875e-05	2.41503e-05	0.000196998	0.000282028	0.977624	1	0.00937533	0.00986516	0.0211461	0.0639106	1	74.3	85.3	121.8	118.6	2.88	0.49	2.42	3.08	High	High	High	High	High	High	High
FALSE	High	Master Protein	Dlo_pri0015F.1_g04440.1	0	56.827	28	10	26	9	363	40.4	8.05	738	10	0	0	0.996	0.839	0.506	0.843	0.508	0.603	0.99885	0.263504	0.000360833	0.31626	0.000414032	0.00299266	1	1	0.0613266	1	0.066345	0.15452	119.7	119.2	100.5	60.6	3.43	1.13	1.07	6.42	High	High	High	High	High	High	High
FALSE	High	Master Protein	Dlo_pri0015F.1_g04470.1	0	173.981	35	25	100	20	811	92.3	6.35	2626	25	0	6	2.042	0.839	1.357	0.411	0.664	1.616	2.7482e-08	0.00253797	2.21141e-05	1.01241e-08	2.97396e-06	9.64402e-07	3.73663e-05	0.313709	0.00986516	1.0324e-05	0.00234403	0.000680428	76.4	155.9	64.1	103.6	1.27	1.52	2.31	0.96	High	High	High	High	High	High	High
FALSE	High	Master Protein	Dlo_pri0017F.1_g06640.1	0	7.421	5	2	3	2	538	58	7.53	126	2	0	0	0.539	1.16	0.554	2.151	1.027	0.478	0.0040484	0.325974	0.00478344	0.00177818	0.982143	0.00203926	0.223154	1	0.260155	0.0980804	1	0.11553	123	66.3	142.6	68.1	1.99	1.99	3.13	4.91	High	High	Not Found	High	High	Not Found	High
FALSE	High	Master Protein	Dlo_pri0018F.1_g00560.1	0	157.493	31	17	95	5	646	70.9	5.29	2585	17	0	0	0.907	0.866	1.045	0.956	1.153	1.207	0.0113219	0.00181938	0.401279	0.476702	0.00153373	0.000330559	0.400286	0.247374	1	1	0.139024	0.0408591	104.8	95	90.7	109.5	1.26	2.27	1.14	1.65	High	High	High	High	High	High	High
FALSE	High	Master Protein	Dlo_pri0021F.1_g08070.1	0	24.988	11	5	20	4	423	46.4	6.58	443	5	0	0	1.284	0.927	1.152	0.722	0.897	1.243	0.0212862	0.588772	0.287207	0.00401612	0.30619	0.0479177	0.561506	1	1	0.167161	1	0.967605	91.7	117.7	85	105.6	1.41	1.77	1	1.38	High	High	High	High	High	High	High
FALSE	High	Master Protein	Dlo_pri0022F.1_g05320.1	0	17.43	39	4	8	4	102	11.7	8.88	158	4	0	0	0.79	0.797	0.828	1.009	1.049	1.039	0.00189694	0.00342815	0.0080144	0.953918	0.642687	0.89818	0.140684	0.39913	0.312165	1	1	1	117.1	92.5	93.4	97	2.61	1.39	4.12	0.78	High	High	High	High	High	High	High
FALSE	High	Master Protein	Dlo_pri0025F.1_g02000.1	0	22.708	28	4	11	2	215	24.2	5.49	310	4	0	0	0.965	1.084	0.789	1.123	0.818	0.729	0.936947	0.757001	0.0285751	0.445319	0.0638623	0.00763179	1	1	0.792912	1	1	0.281208	104.2	100.5	112.9	82.3	1.79	1.75	3.55	2.59	High	High	High	High	High	High	High
FALSE	High	Master Protein	Dlo_pri0025F.1_g02210.1	0	67.948	26	9	33	9	435	49.9	9.69	881	9	0	0	0.569	0.727	1.164	1.278	2.045	1.601	0.00189174	0.0406597	0.474617	0.15156	0.000393863	0.00549005	0.140684	1	1	1	0.066345	0.234094	115.6	65.8	84.1	134.6	1.95	4.83	2.39	1.72	High	High	High	High	High	High	High
FALSE	High	Master Protein	Dlo_pri0025F.1_g02950.1	0	71.41	18	13	43	11	854	95.2	7.43	900	13	0	2	0.606	0.901	1.857	1.486	3.063	2.06	0.00602985	0.785421	0.00131248	0.020523	2.1092e-05	0.000497248	0.261657	1	0.144692	0.504296	0.00860343	0.0486535	91.6	55.6	82.6	170.2	0.77	6.15	2.09	3.54	High	High	High	High	High	High	High
FALSE	High	Master Protein	Dlo_pri0028F.1_g03170.1	0	91.956	24	13	44	1	671	77.2	5.17	1200	13	0	7	0.614	0.92	0.729	1.497	1.187	0.793	0.00388251	0.745835	0.0307223	0.0140109	0.433072	0.127839	0.219955	1	0.813742	0.411155	1	1	122.6	75.3	112.7	89.4	6.59	6.21	1.24	3.19	High	Not Found	Not Found	High	Not Found	Not Found	High
FALSE	High	Master Protein	Dlo_pri0028F.1_g05100.1	0	49.462	35	8	41	8	239	26.4	7.75	953	8	0	0	0.758	1.099	0.468	1.448	0.618	0.426	0.372598	0.911312	0.00654227	0.159338	0.0668758	0.00295971	1	1	0.287382	1	1	0.15452	120.3	91.2	132.1	56.3	1.32	0.97	0.54	2.39	High	High	High	High	High	High	High
FALSE	High	Master Protein	Dlo_pri0031F.1_g02190.1	0	17.485	13	4	9	4	329	36.8	5.66	193	4	0	0	0.961	1.114	0.882	1.159	0.918	0.792	0.976034	0.104611	0.208771	0.0590547	0.350957	0.00550945	1	1	1	0.983201	1	0.234094	101.1	97.2	112.6	89.2	4.1	1.52	2.6	2.59	High	High	High	High	High	High	High
FALSE	High	Master Protein	Dlo_pri0037F.1_g01930.1	0	48.543	22	4	93	2	223	24	8.06	2431	4	0	0	1.316	1.752	2.612	1.331	1.984	1.49	0.175287	0.00500155	0.000125022	0.112336	0.00112134	0.0282444	1	0.523111	0.0299979	1	0.108903	0.673736	59.9	78.8	104.9	156.4	3.28	4.76	1.59	3.13	High	High	High	High	High	High	High
FALSE	High	Master Protein	Dlo_pri0037F.1_g02010.1	0	30.281	11	4	42	2	297	31.9	8.44	1013	4	0	3	1.32	2.071	2.897	1.569	2.195	1.399	0.112382	0.000605243	4.47794e-05	0.0126371	0.000420355	0.0666626	1	0.137968	0.0140504	0.383037	0.066345	1	54.9	72.4	113.7	159	4.45	2.95	2.9	3.18	High	High	High	High	High	High	High
FALSE	High	Master Protein	Dlo_pri0042F.1_g00550.1	0	10.363	7	3	4	3	523	59.2	8.97	148	3	0	0	1.127	0.9	1.067	0.799	0.946	1.185	0.0176651	0.028015	0.12703	0.00169613	0.187872	0.00498809	0.490232	1	1	0.0980804	1	0.216451	97.7	110.1	88	104.2	0.46	0.82	2.29	2.37	High	Not Found	High	High	Not Found	High	High
FALSE	High	Master Protein	Dlo_pri0045F.1_g00320.1	0	79.852	47	13	76	8	341	37.2	8.32	1573	13	0	2	0.738	1.482	0.686	2.008	0.93	0.463	0.354677	0.176096	0.151669	0.0151937	0.913186	0.00656233	1	1	1	0.429005	1	0.267677	102.4	75.6	151.7	70.3	2.19	4.03	6.44	6.78	High	High	High	High	High	High	High
FALSE	High	Master Protein	Dlo_pri0045F.1_g03450.1	0	15.76	9	4	10	1	475	52	6.1	215	4	0	0	0.628	1.522	1	2.424	1.593	0.657	0.000660053	0.0013534	0.999868	6.13605e-06	0.000615261	0.00146043	0.0745686	0.190362	1	0.0013905	0.0725988	0.094557	96.4	60.5	146.7	96.4	0.31	2.25	1.41	1.41	High	High	High	High	High	High	High
FALSE	High	Master Protein	Dlo_pri0046F.1_g03060.1	0	177.387	38	15	266	15	514	57.7	9.52	6949	15	0	0	1.521	1.3	1.818	0.855	1.195	1.398	0.00530442	0.0654903	0.00052676	0.308758	0.23569	0.0174741	0.235182	1	0.0795797	1	1	0.488197	70.9	107.9	92.2	128.9	0.51	0.71	1.2	1.13	High	High	High	High	High	High	High
FALSE	High	Master Protein	Dlo_pri0050F.1_g01710.1	0	10.937	11	3	11	1	227	24.7	7.31	284	3	0	0	0.76	1.564	2.198	2.059	2.894	1.406	0.358846	0.0543864	0.00310037	0.0052441	0.000471202	0.205213	1	1	0.212611	0.194461	0.066345	1	72.4	55	113.3	159.2	2.01	3.71	2.55	1.31	High	High	High	High	High	High	High
FALSE	High	Master Protein	Dlo_pri0055F.1_g00520.1	0	7.113	5	2	9	2	354	37.6	6.52	221	2	0	0	1.517	1.144	2.146	0.754	1.414	1.876	0.0990752	0.791872	0.00487021	0.343509	0.192166	0.0159826	1	1	0.261389	1	1	0.46586	68.9	104.5	78.8	147.8	1.79	3.89	0.4	3.69	High	High	High	High	High	High	High
FALSE	High	Master Protein	Dlo_pri0060F.1_g02300.1	0	16.228	5	4	10	1	827	91.6	6.73	232	4	0	0	0.815	0.942	0.754	1.155	0.924	0.8	0.00789271	0.314264	0.00230973	0.0271466	0.169651	0.00567776	0.307029	1	0.201507	0.598546	1	0.238759	113.9	92.9	107.3	85.9	0.02	2.2	0.15	2.23	Not Found	High	High	Not Found	High	High	Not Found
FALSE	High	Master Protein	Dlo_pri0061F.1_g03850.1	0	118.602	48	13	71	12	365	41.7	7.84	1881	13	0	1	1.081	1.163	0.71	1.076	0.657	0.611	0.482414	0.0818191	0.0016328	0.555734	0.000352391	0.000105668	1	1	0.158576	1	0.066345	0.0195919	101.2	109.4	117.6	71.8	0.79	1.58	1.59	3.22	High	High	High	High	High	High	High
FALSE	High	Master Protein	Dlo_pri0065F.1_g00700.1	0	34.495	10	9	18	5	1036	115.9	5.26	344	9	0	4	1.18	0.949	1.114	0.804	0.943	1.173	0.0185809	0.805565	0.197524	0.00578364	0.383452	0.0562173	0.505276	1	1	0.208774	1	1	94.3	111.3	89.5	105	3.85	5.66	3.78	2.26	High	High	High	High	High	High	High
			Dlo_pri0065F.1_g00700.1	0	34.495	10	9	18	5	1036	115.9	5.26	344	9	0	4	1.18	0.949	1.114	0.804	0.943	1.173	0.0185809	0.805565	0.197524	0.00578364	0.383452	0.0562173	0.505276	1	1	0.208774	1	1	94.3	111.3	89.5	105	3.85	5.66	3.78	2.26	High	High	High	High	High	High	High
FALSE	High	Master Protein	Dlo_pri0066F.1_g01710.1	0	56.357	24	5	38	5	379	40.9	4.98	812	5	0	0	0.292	0.793	1.379	2.718	4.725	1.738	8.95411e-06	0.20894	0.0557471	3.9208e-05	1.58804e-06	0.0032156	0.00280952	1	1	0.00638909	0.00161941	0.163956	115.5	33.7	91.6	159.2	1.37	14.24	1.52	2.46	High	High	High	High	High	High	High
FALSE	High	Master Protein	Dlo_pri0067F.1_g01990.1	0	30.472	33	6	21	6	208	22.3	9.35	587	6	0	0	0.754	0.983	0.889	1.304	1.179	0.904	0.000694681	0.996521	0.0967384	0.000861061	0.0174629	0.129625	0.0745686	1	1	0.0615387	0.71231	1	110.3	83.2	108.5	98.1	1.42	3.62	1.34	0.89	High	High	High	High	High	High	High
FALSE	High	Master Protein	Dlo_pri0070F.1_g04170.1	0	21.036	12	2	10	2	219	24.3	6.02	290	2	0	0	1.541	0.934	1.928	0.606	1.251	2.065	0.0897158	0.984721	0.0144041	0.0550321	0.576338	0.00915861	1	1	0.489618	0.956287	1	0.300673	74	114.1	69.1	142.7	3.47	1.69	0.97	0.39	High	High	High	High	High	High	High
FALSE	High	Master Protein	Dlo_pri0071F.1_g02720.1	0	15.42	8	2	6	2	276	30.1	6.92	176	2	0	0	1.249	0.981	0.831	0.786	0.666	0.847	0.145067	0.986607	0.154825	0.0913	0.00560823	0.241881	1	1	1	1	0.341433	1	98.5	123	96.6	81.9	2.8	1.85	1.67	2.09	High	High	High	High	High	High	High
FALSE	High	Master Protein	Dlo_pri0072F.1_g03700.1	0	48.381	27	8	29	8	419	43.3	5.21	844	8	0	0	0.543	1.218	0.878	2.241	1.616	0.721	0.0244411	0.616771	0.878096	0.00482659	0.0687734	0.26796	0.610877	1	1	0.183997	1	1	109.9	59.7	133.9	96.5	1.32	1.35	0.37	1.32	High	High	High	High	High	High	High
			Dlo_pri0072F.1_g03700.1	0	48.381	27	8	29	8	419	43.3	5.21	844	8	0	0	0.543	1.218	0.878	2.241	1.616	0.721	0.0244411	0.616771	0.878096	0.00482659	0.0687734	0.26796	0.610877	1	1	0.183997	1	1	109.9	59.7	133.9	96.5	1.32	1.35	0.37	1.32	High	High	High	High	High	High	High
FALSE	High	Master Protein	Dlo_pri0074F.1_g01700.1	0	126.361	28	23	52	23	1023	112.4	6.9	1284	23	0	0	0.892	1.093	1.087	1.226	1.219	0.994	0.00461608	0.0145348	0.0301597	7.90661e-05	0.000123125	0.947334	0.231103	0.926368	0.813742	0.0111211	0.0358733	1	98.2	87.6	107.4	106.8	1.07	0.81	1.75	1.28	High	High	High	High	High	High	High
FALSE	High	Master Protein	Dlo_pri0076F.1_g03020.1	0	57.148	14	8	26	7	762	83.8	6.07	759	8	0	1	0.664	2.188	1.715	3.293	2.581	0.784	0.456384	0.0730274	0.24643	0.00886273	0.0287263	0.814846	1	1	1	0.284654	0.881012	1	71.8	47.7	157.2	123.2	3.43	3.95	1.41	0.99	High	High	High	High	High	High	High
FALSE	High	Master Protein	Dlo_pri0079F.1_g04270.1	0	81.815	31	13	37	2	574	64.8	5.34	989	13	0	12	0.626	0.858	0.782	1.37	1.249	0.911	0.00835394	0.470634	0.1712	0.0657529	0.202317	0.849754	0.318465	1	1	1	1	1	122.5	76.7	105.1	95.7	1.23	3.15	2.71	1.08	High	High	High	High	High	High	High
FALSE	High	Master Protein	Dlo_pri0082F.1_g01050.1	0	28.442	18	3	9	3	267	29.6	5.97	359	3	0	0	1.911	1.403	1.303	0.734	0.682	0.929	0.00299791	0.0981299	0.211538	0.110864	0.0505992	0.942266	0.19107	1	1	1	1	1	71.2	136.1	99.9	92.8	3.13	2.59	1.7	1.08	High	High	High	High	High	High	High
FALSE	High	Master Protein	Dlo_pri0088F.1_g02980.1	0	25.183	12	5	14	1	451	50.2	5.76	380	5	0	4	0.537	0.718	0.597	1.336	1.111	0.832	0.00362576	0.111323	0.0103727	0.122449	0.832882	0.372426	0.217249	1	0.385272	1	1	1	140.2	75.4	100.7	83.7	1.26	3.58	3	2.11	High	High	Not Found	High	High	Not Found	High
FALSE	High	Master Protein	Dlo_pri0088F.1_g03320.1	0	36.3	73	4	21	4	86	9.1	5.4	577	4	0	0	0.623	0.765	0.587	1.229	0.942	0.766	0.00530185	0.121707	0.0040215	0.172957	0.995551	0.126402	0.235182	1	0.241231	1	1	1	134.5	83.7	102.9	78.9	6.9	2.1	2.29	10.86	High	High	High	High	High	High	High
FALSE	High	Master Protein	Dlo_pri0099F.1_g00750.1	0	105.454	32	10	109	10	365	39.4	8.48	2998	10	0	0	1.413	1.094	1.498	0.775	1.06	1.369	0.00492237	0.646375	0.00203444	0.0232415	0.874343	0.00860277	0.231103	1	0.188601	0.54484	1	0.29676	79.9	112.9	87.5	119.7	1.2	1.39	0.84	0.95	High	High	High	High	High	High	High
FALSE	High	Master Protein	Dlo_pri0112F.1_g00900.1	0	38.943	35	5	26	5	166	17.9	8.82	886	5	0	0	0.711	1.316	2.359	1.851	3.316	1.792	0.525235	0.697766	0.0306452	0.131224	0.00481448	0.144127	1	1	0.813742	1	0.304251	1	74.3	52.8	97.7	175.2	4.53	3.27	3.25	1.63	High	High	High	High	High	High	High
FALSE	High	Master Protein	Dlo_pri0120F.1_g01910.1	0	56.576	42	5	51	4	145	15.4	5.72	1573	5	0	0	1.281	1.564	0.843	1.221	0.658	0.539	0.0178056	0.000546545	0.197715	0.0676767	0.00121035	7.57564e-05	0.490232	0.137968	1	1	0.112205	0.0154505	85.3	109.3	133.4	71.9	1.93	0.99	3.29	4.74	High	High	High	High	High	High	High
FALSE	High	Master Protein	Dlo_pri0128F.1_g01840.1	0	11.007	11	3	4	2	268	28.6	7.24	83	3	0	0	1.085	0.878	1.199	0.809	1.105	1.365	0.0913101	0.0200814	0.00607861	0.00336593	0.049773	0.00075844	1	1	0.284996	0.150875	1	0.0572903	96.1	104.3	84.4	115.2	1.4	0.5	4.01	2.23	High	High	Not Found	High	High	Not Found	High
FALSE	High	Master Protein	Dlo_pri0132F.1_g00160.1	0	142.701	34	21	63	3	809	89.6	5.11	1739	21	0	19	0.858	1.222	0.985	1.424	1.148	0.806	0.197359	0.0492174	0.999999	0.00275802	0.200942	0.0483019	1	1	1	0.132353	1	0.970558	98.4	84.4	120.2	96.9	1.45	2.76	1.53	2.56	Not Found	High	High	Not Found	High	High	Not Found
FALSE	High	Master Protein	Dlo_pri0132F.1_g02700.1	0	66.279	33	7	38	2	392	44.7	6.07	1188	7	0	7	0.442	1.031	0.898	2.331	2.032	0.872	0.00210775	0.997909	0.891902	0.00172963	0.00484832	0.814326	0.150834	1	1	0.0980804	0.304251	1	118.7	52.5	122.3	106.6	0.7	4	2.18	1.25	High	High	High	High	High	High	High
			Dlo_pri0132F.1_g02700.1	0	66.279	33	7	38	2	392	44.7	6.07	1188	7	0	7	0.442	1.031	0.898	2.331	2.032	0.872	0.00210775	0.997909	0.891902	0.00172963	0.00484832	0.814326	0.150834	1	1	0.0980804	0.304251	1	118.7	52.5	122.3	106.6	0.7	4	2.18	1.25	High	High	High	High	High	High	High
FALSE	High	Master Protein	Dlo_pri0138F.1_g01030.1	0	74.607	45	9	47	9	234	25.8	5.16	1409	9	0	0	0.427	1.352	0.807	3.166	1.89	0.597	0.00378541	0.310523	0.59082	0.000495	0.0198104	0.0525485	0.217475	1	1	0.0395903	0.784529	1	111.6	47.6	150.8	90	0.55	2.43	1.2	1.48	High	High	High	High	High	High	High
FALSE	High	Master Protein	Dlo_pri0151F.1_g00880.1	0	45.62	14	6	32	5	537	59.4	6.96	754	6	0	1	1.584	1.393	1.505	0.879	0.95	1.08	0.00764967	0.0474644	0.0152504	0.556692	0.949384	0.840636	0.302942	1	0.514102	1	1	1	73	115.6	101.6	109.8	0.56	1.91	0.98	0.93	High	High	High	High	High	High	High
FALSE	High	Master Protein	Dlo_pri0160F.1_g01640.1	0	151.131	64	21	144	21	316	35.9	6.21	3839	21	0	0	1.123	1.034	0.886	0.92	0.789	0.857	0.0417193	0.759575	0.0284674	0.167183	0.00054681	0.00765238	0.816893	1	0.792912	1	0.0697011	0.281208	98.9	111.1	102.3	87.6	0.78	0.33	1.78	1.99	High	High	High	High	High	High	High
FALSE	High	Master Protein	Dlo_pri0183F.1_g00880.1	0	6.547	15	2	6	2	126	13.8	5.43	123	2	0	0	1.976	0.816	1.174	0.413	0.594	1.438	0.0100648	0.582165	0.754745	0.00205029	0.0387838	0.175094	0.373221	1	1	0.110041	1	1	80.5	159.2	65.7	94.5	3.06	3.74	4.31	0.54	High	High	High	High	High	High	High
FALSE	High	Master Protein	Dlo_pri0185F.1_g00360.1	0	26.375	17	5	11	5	386	43.5	7.9	226	5	0	0	1.141	1.043	1.362	0.914	1.194	1.307	0.252915	0.932764	0.00418118	0.509005	0.0619947	0.00870368	1	1	0.247174	1	1	0.29676	88	100.4	91.7	119.9	2.21	3.69	2.11	2.22	High	High	High	High	High	High	High
FALSE	High	Master Protein	Dlo_pri0200F.1_g01010.1	0	13.729	7	3	4	3	435	46.9	6.8	102	3	0	0	0.619	0.793	0.73	1.281	1.179	0.92	0.00258169	0.0361577	0.0124344	0.0286725	0.103706	0.46343	0.175512	1	0.44351	0.628791	1	1	127.3	78.8	101	92.9	4.1	0.8	4.35	0.21	Not Found	High	High	Not Found	High	High	Not Found
FALSE	High	Master Protein	Dlo_pri0208F.1_g01680.1	0	24.377	8	4	12	4	573	65.1	7.43	336	4	0	0	1.735	0.923	1.262	0.532	0.727	1.368	0.000527679	0.768531	0.0707079	0.000211236	0.0162855	0.0183244	0.0633059	1	1	0.0215408	0.691964	0.496447	81.3	141.1	75	102.6	2.77	2.91	2.52	1.95	High	High	High	High	High	High	High
FALSE	High	Master Protein	Dlo_pri0215F.1_g00860.1	0	23.401	18	5	15	5	384	43.2	7.21	342	5	0	0	3.57	1.652	1.631	0.463	0.457	0.987	8.82937e-07	0.00119491	0.0015075	3.14272e-05	2.69664e-05	0.996268	0.00036015	0.188027	0.157669	0.00557354	0.00916633	1	50.9	181.9	84.1	83.1	5.04	1.71	2.27	4.75	High	High	High	High	High	High	High
FALSE	High	Master Protein	Dlo_pri0218F.1_g01320.1	0	25.39	15	4	10	4	386	43	5.4	217	4	0	0	0.656	1.084	0.676	1.652	1.03	0.624	0.00372721	0.814492	0.00674718	0.00136184	0.960601	0.0023385	0.217249	1	0.289703	0.0816903	1	0.12551	117.1	76.8	126.9	79.2	4.71	2.91	4.43	3.18	High	High	High	High	High	High	High
FALSE	High	Master Protein	Dlo_pri0229F.1_g01740.1	0	67.09	27	14	41	8	611	67	5.78	981	14	0	6	0.771	0.994	0.883	1.289	1.145	0.889	0.00272202	0.998077	0.170262	0.00332635	0.0564536	0.214517	0.176948	1	1	0.150875	1	1	109.7	84.5	109	96.8	0.61	2.36	0.5	1.7	High	High	High	High	High	High	High
FALSE	High	Master Protein	Dlo_pri0230F.1_g00760.1	0	22.517	18	4	20	4	217	24.8	6.23	504	4	0	0	0.927	0.715	0.853	0.771	0.92	1.193	0.742782	0.00352259	0.123624	0.0126771	0.459977	0.106574	1	0.39913	1	0.383037	1	1	114.4	106.1	81.8	97.6	0.22	2.54	1.96	1.22	High	High	High	High	High	High	High
			Dlo_pri0230F.1_g00760.1	0	22.517	18	4	20	4	217	24.8	6.23	504	4	0	0	0.927	0.715	0.853	0.771	0.92	1.193	0.742782	0.00352259	0.123624	0.0126771	0.459977	0.106574	1	0.39913	1	0.383037	1	1	114.4	106.1	81.8	97.6	0.22	2.54	1.96	1.22	High	High	High	High	High	High	High
FALSE	High	Master Protein	Dlo_pri0236F.1_g01240.1	0	78.651	45	10	46	9	323	36.3	6.2	1308	10	0	1	0.576	0.906	0.39	1.575	0.677	0.43	0.00482182	0.818676	0.000113162	0.0147104	0.0250041	0.000242388	0.231103	1	0.0288491	0.425557	0.816541	0.0334286	139.3	80.2	126.3	54.3	0.35	1.9	1.21	1.87	High	High	High	High	High	High	High
FALSE	High	Master Protein	Dlo_pri0246F.1_g00960.1	0	10.71	8	2	4	1	326	35.2	5.34	99	2	0	0	0.68	1.036	0.965	1.523	1.419	0.932	0.000352663	0.854465	0.840644	0.000170777	0.000798787	0.419159	0.0479505	1	1	0.0204882	0.0857434	1	108.6	73.9	112.6	104.9	0.24	4.67	1.71	2.28	High	High	High	High	High	High	High
FALSE	High	Master Protein	Dlo_pri0263F.1_g00840.1	0	11.2	11	3	5	3	288	32.5	8.62	119	3	0	0	1.932	1.111	1.429	0.575	0.74	1.286	0.00312031	0.552481	0.0289802	0.00601343	0.050467	0.0882541	0.195811	1	0.796349	0.21117	1	1	73.1	141.2	81.2	104.4	2.99	1.38	0.81	0.4	High	Not Found	High	High	Not Found	High	High
FALSE	High	Master Protein	Dlo_pri0278F.1_g01080.1	0	22.333	16	4	9	4	344	37	5.53	322	4	0	0	1.259	0.737	1.001	0.585	0.795	1.358	0.181884	0.0920556	0.999998	0.00435006	0.186174	0.0898541	1	1	1	0.17396	1	1	100.1	126	73.7	100.2	1.12	2.54	4.64	0.98	High	High	High	High	High	High	High
FALSE	High	Master Protein	Dlo_pri0282F.1_g00550.1	0	121.465	29	12	72	12	498	56.3	8.79	2351	12	0	0	1.652	1.373	2.081	0.831	1.26	1.516	0.046757	0.206021	0.0076903	0.720439	0.564847	0.153706	0.851172	1	0.312165	1	1	1	65.5	108.2	89.9	136.4	1.59	1.4	3.67	4.12	High	High	High	High	High	High	High
FALSE	High	Master Protein	Dlo_pri0292F.1_g00990.1	0	55.32	43	8	38	8	232	25.6	6.67	1034	8	0	0	2.043	0.905	1.493	0.443	0.731	1.648	0.000284785	0.659198	0.0120803	0.000102089	0.0392	0.00282166	0.0430237	1	0.436068	0.0130131	1	0.149475	73.5	150.2	66.6	109.7	0.86	1.26	2.03	0.37	High	High	High	High	High	High	High
FALSE	High	Master Protein	Dlo_pri0305F.1_g01580.1	0	42.008	29	6	20	6	232	25.6	8.06	629	6	0	0	0.943	1.149	0.896	1.218	0.95	0.78	0.606879	0.0433349	0.0910963	0.00790445	0.474038	0.00133045	1	1	1	0.257938	1	0.0904487	100.3	94.6	115.2	89.9	0.65	4.28	4.96	2.44	High	High	High	High	High	High	High
FALSE	High	Master Protein	Dlo_pri0334F.1_g01290.1	0	9.425	6	2	4	2	393	42.8	7.15	131	2	0	0	0.896	0.967	0.702	1.08	0.784	0.726	0.338049	0.983813	0.0025557	0.505734	0.0251774	0.00387475	1	1	0.201507	1	0.816541	0.185942	112.2	100.5	108.5	78.8	1.73	2.11	1.46	2.17	High	High	High	High	High	High	High
FALSE	High	Master Protein	Dlo_pri0347F.1_g00670.1	0	111.095	39	16	52	16	580	63.8	8.25	1376	16	0	0	1.222	1.444	1.092	1.181	0.893	0.756	0.0871075	0.00591722	0.574425	0.267205	0.487798	0.0340987	1	0.588691	1	1	1	0.755917	84.1	102.8	121.4	91.8	1.17	2	2.27	1.81	High	High	High	High	High	High	High
FALSE	High	Master Protein	Dlo_pri0355F.1_g00260.1	0	51.672	61	7	40	7	107	11.2	6.61	1246	7	0	0	2.513	1.003	0.92	0.399	0.366	0.917	0.00081124	0.997495	0.944322	0.000985939	0.000467376	0.880245	0.0827262	1	1	0.0638356	0.066345	1	73.6	184.9	73.8	67.7	4.51	4.93	3.53	5.16	High	High	High	High	High	High	High
FALSE	High	Master Protein	Dlo_pri0360F.1_g00050.1	0	302.156	60	10	400	6	230	24.6	4.91	16416	10	0	8	0.391	1.868	0.821	4.773	2.098	0.439	8.38406e-05	0.0012446	0.279164	1.70551e-06	0.000477961	0.000184138	0.0213741	0.188027	1	0.000463786	0.066345	0.0278184	98	38.4	183.1	80.5	0.62	8.43	2.15	0.5	High	High	High	High	High	High	High
FALSE	High	Master Protein	Dlo_pri0370F.1_g01060.1	0	145.287	39	14	89	10	460	50.1	8.02	2719	14	0	5	1.672	0.833	1.928	0.498	1.153	2.316	0.000345088	0.125658	6.69318e-05	4.07248e-05	0.299962	1.10047e-05	0.0479505	1	0.018201	0.00638909	1	0.00408075	73.6	123.1	61.3	142	2.9	2.29	0.64	0.33	High	High	High	High	High	High	High
FALSE	High	Master Protein	Dlo_pri0370F.1_g01080.1	0	96.521	45	7	68	4	217	23.5	8.66	2631	7	0	0	1.795	0.757	1.967	0.422	1.096	2.598	0.00207969	0.107341	0.000808506	0.000149302	0.819028	7.24759e-05	0.150834	1	0.113721	0.0184547	1	0.0154505	72.5	130.1	54.9	142.6	0.36	0.24	1.61	0.74	High	High	High	High	High	High	High
FALSE	High	Master Protein	Dlo_pri0382F.1_g00320.1	0	31.262	17	6	14	6	378	41.2	7.34	357	6	0	0	0.347	0.851	0.507	2.451	1.461	0.596	9.34613e-05	0.574221	0.00178064	0.000296903	0.0593981	0.00872315	0.0221222	1	0.168913	0.028835	1	0.29676	147.8	51.3	125.8	75	1.22	10.34	6.2	4.32	High	High	High	High	High	High	High
FALSE	High	Master Protein	Dlo_pri0386F.1_g00860.1	0	24.871	59	5	25	5	101	11.2	6.1	759	5	0	0	1.443	0.961	0.846	0.666	0.587	0.881	0.00655295	0.980297	0.24392	0.00411425	0.000640735	0.390893	0.269451	1	1	0.169515	0.0725988	1	94.1	135.8	90.5	79.7	2.22	3.51	1.83	2.66	High	High	High	High	High	High	High
FALSE	High	Master Protein	Dlo_pri0469F.1_g00500.1	0	32.159	12	4	30	1	298	31.2	4.65	651	4	0	0	2.122	0.441	3.79	0.208	1.786	8.585	0.0338111	0.0276404	0.00117805	0.00046167	0.0998504	4.52026e-05	0.724947	1	0.13348	0.037663	1	0.0102434	54.4	115.4	24	206.2	3.3	1.55	6.2	2.01	High	High	High	High	High	High	High
FALSE	High	Master Protein	Dlo_pri0469F.1_g00680.1	0	138.756	49	10	111	10	294	31.6	9.22	3015	10	0	0	0.629	1.165	0.353	1.851	0.561	0.303	0.334444	0.911415	0.0159538	0.140882	0.197564	0.00682736	1	1	0.525746	1	1	0.267826	127.1	80	148	44.9	2.16	1.12	1.65	6.52	High	High	High	High	High	High	High
FALSE	High	Master Protein	Dlo_pri0497F.1_g01060.1	0	80.511	10	10	57	1	1079	122.2	7.28	1588	10	0	0	1.481	0.837	2.203	0.565	1.487	2.632	0.188405	0.493689	0.00644217	0.0240698	0.138721	0.00116376	1	1	0.287382	0.554694	1	0.0804572	72.4	107.3	60.6	159.6	3.75	2.09	10.07	4.71	High	High	High	High	High	High	High
			Dlo_pri0497F.1_g01060.1	0	80.511	10	10	57	1	1079	122.2	7.28	1588	10	0	0	1.481	0.837	2.203	0.565	1.487	2.632	0.188405	0.493689	0.00644217	0.0240698	0.138721	0.00116376	1	1	0.287382	0.554694	1	0.0804572	72.4	107.3	60.6	159.6	3.75	2.09	10.07	4.71	High	High	High	High	High	High	High
FALSE	High	Master Protein	Dlo_pri0569F.1_g00260.1	0	42.609	9	10	16	10	1495	168.8	8.75	443	10	0	0	1.715	1.077	2.238	0.628	1.305	2.078	0.0193526	0.909143	0.00157358	0.0481895	0.250723	0.00334898	0.522777	1	0.157773	0.873622	1	0.166591	66.3	113.8	71.4	148.5	4.58	3.46	4.66	2.1	High	High	High	High	High	High	High
FALSE	High	Master Protein	Dlo_pri0580F.1_g00070.1	0	32.144	12	4	31	1	300	31.5	4.55	653	4	0	5	1.412	0.543	3.248	0.385	2.301	5.977	0.388324	0.15694	0.00290385	0.0150349	0.0249773	0.000245859	1	1	0.212611	0.429005	0.816541	0.0334286	64.5	91	35	209.4	6	5.74	7.87	2.49	High	High	High	High	High	High	High
FALSE	High	Master Protein	Dlo_pri0589F.1_g00610.1	0	9.026	21	2	9	2	91	10.6	8.38	259	2	0	0	0.754	0.947	1.046	1.256	1.388	1.105	0.00181465	0.659714	0.757795	0.0073335	0.000631977	0.212845	0.140684	1	1	0.241237	0.0725988	1	106.7	80.5	101.1	111.7	0.91	1.66	2.99	0.66	High	High	High	High	High	High	High
FALSE	High	Master Protein	Dlo_pri0611F.1_g00380.1	0	33.209	19	5	21	5	324	35.5	7.2	656	5	0	0	1.617	1.008	1.072	0.623	0.663	1.064	0.000215683	0.999913	0.656295	0.000204299	0.000663251	0.622377	0.036657	1	1	0.0213675	0.0731189	1	85.2	137.7	85.8	91.3	2.68	3.02	3.15	0.88	High	High	High	High	High	High	High
FALSE	High	Master Protein	Dlo_pri0659F.1_g00640.1	0	30.031	10	4	11	4	483	53.5	5.68	404	4	0	0	1.224	1.039	1.168	0.849	0.954	1.124	0.00114825	0.868996	0.00811215	0.00268864	0.397411	0.0222114	0.106848	1	0.312165	0.130559	1	0.559262	90.3	110.5	93.8	105.4	1.99	2.67	2.29	0.83	High	High	High	High	High	High	High
FALSE	High	Master Protein	Dlo_pri0952F.1_g00200.1	0	113.462	35	11	64	8	582	65	6.84	2064	11	0	4	2.04	0.942	1.79	0.462	0.877	1.901	1.03473e-08	0.0932551	3.08079e-08	6.4114e-09	0.00173632	1.73511e-08	2.11032e-05	1	2.51331e-05	8.71737e-06	0.153772	2.35918e-05	69.3	141.4	65.3	124.1	2.74	1.95	2.83	1.4	High	High	High	High	High	High	High
FALSE	High	Master Protein	Dlo_pri0952F.1_g00270.1	0	57.532	24	8	21	5	582	65.1	7.27	564	8	0	0	1.565	0.785	2.105	0.501	1.345	2.683	0.0819742	0.539867	0.00720875	0.0121233	0.343698	0.00140797	1	1	0.306297	0.380393	1	0.0941495	73.3	114.8	57.5	154.3	0.23	0.36	6.19	2.34	High	High	High	High	High	High	High
FALSE	High	Master Protein	Dlo_pri0990F.1_g00080.1	0	186.36	45	11	265	2	265	28.9	8.15	8814	11	0	1	2.263	3.258	3.741	1.44	1.653	1.148	0.0683936	0.0110842	0.00657989	0.572584	0.367606	0.975667	1	0.822043	0.287382	1	1	1	39	88.2	127	145.8	25.65	5.06	7.24	4.78	High	High	High	High	High	High	High
FALSE	High	Master Protein	Dlo_pri1054F.1_g00040.1	0	23.114	16	4	23	4	253	27.7	10.24	611	4	0	0	1.523	0.315	1.141	0.207	0.749	3.623	0.00440984	3.45701e-06	0.451117	2.77553e-07	0.0338049	1.53263e-06	0.224847	0.00235019	1	0.000102922	0.93169	0.000680428	100.5	153.1	31.7	114.7	0.95	0.69	0.96	0.8	High	High	High	High	High	High	High
FALSE	High	Master Protein	Dlo_pri1141F.1_g00160.1	0	58.322	19	8	35	8	475	52.7	6.48	849	8	0	0	0.992	0.483	0.596	0.486	0.6	1.234	0.999994	0.000642252	0.00573207	0.00065831	0.00590874	0.281102	1	0.137968	0.284996	0.051332	0.354438	1	130.3	129.2	62.9	77.6	1.14	0.17	2.24	0.88	High	High	High	High	High	High	High
FALSE	High	Master Protein	Dlo_pri1376F.1_g00190.1	0	7.737	3	2	2	2	591	66.4	7.71	51	2	0	0	1.122	0.848	1.173	0.755	1.045	1.384	0.0257883	0.00705254	0.00807179	0.000935376	0.351222	0.000524823	0.629883	0.594978	0.312165	0.0615387	1	0.0486535	96.6	108.3	81.8	113.2	2.54	2.21	1.97	1.47	High	Not Found	High	High	Not Found	High	High
FALSE	High	Master Protein	Dlo_pri2008F.1_g00030.1	0	113.822	38	8	278	3	265	28.8	8.43	8097	8	0	0	1.243	2.181	2.032	1.755	1.635	0.932	0.322654	0.00334508	0.00562315	0.0364663	0.0665966	0.971911	1	0.39913	0.284996	0.733298	1	1	62	77	135.1	125.9	8.48	5.01	0.7	0.56	High	High	High	High	High	High	High
[truncated: 47 more columns]

## Sheet: 102 accession
Dlo_pri0046F.1_g00570.1
Dlo_pri0149F.1_g00060.1
Dlo_alt0004F-024-01.1_g00140.1
Dlo_alt0369F-003-01.1_g00280.1
Dlo_alt0613F-003-01.1_g00120.1
Dlo_alt0788F-001-01.1_g00070.1
Dlo_alt0990F-001-01.1_g00020.1
Dlo_pri0001F.1_g01390.1
Dlo_pri0001F.1_g02250.1
Dlo_pri0001F.1_g06240.1
Dlo_pri0002F.1_g01920.1
Dlo_pri0002F.1_g06040.1
Dlo_pri0002F.1_g07010.1
Dlo_pri0004F.1_g05100.1
Dlo_pri0004F.1_g05480.1
Dlo_pri0004F.1_g07700.1
Dlo_pri0006F.1_g04810.1
Dlo_pri0009F.1_g01770.1
Dlo_pri0009F.1_g02500.1
Dlo_pri0014F.1_g00230.1
Dlo_pri0015F.1_g01420.1
Dlo_pri0015F.1_g04440.1
Dlo_pri0015F.1_g04470.1
Dlo_pri0017F.1_g06640.1
Dlo_pri0018F.1_g00560.1
Dlo_pri0021F.1_g08070.1
Dlo_pri0022F.1_g05320.1
Dlo_pri0025F.1_g02000.1
Dlo_pri0025F.1_g02210.1
Dlo_pri0025F.1_g02950.1
Dlo_pri0028F.1_g03170.1
Dlo_pri0028F.1_g05100.1
Dlo_pri0031F.1_g02190.1
Dlo_pri0037F.1_g01930.1
Dlo_pri0037F.1_g02010.1
Dlo_pri0042F.1_g00550.1
Dlo_pri0045F.1_g00320.1
Dlo_pri0045F.1_g03450.1
Dlo_pri0046F.1_g03060.1
Dlo_pri0050F.1_g01710.1
Dlo_pri0055F.1_g00520.1
Dlo_pri0060F.1_g02300.1
Dlo_pri0061F.1_g03850.1
Dlo_pri0065F.1_g00700.1
Dlo_pri0066F.1_g01710.1
Dlo_pri0067F.1_g01990.1
Dlo_pri0070F.1_g04170.1
Dlo_pri0071F.1_g02720.1
Dlo_pri0072F.1_g03700.1
Dlo_pri0074F.1_g01700.1
Dlo_pri0076F.1_g03020.1
Dlo_pri0079F.1_g04270.1
Dlo_pri0082F.1_g01050.1
Dlo_pri0088F.1_g02980.1
Dlo_pri0088F.1_g03320.1
Dlo_pri0099F.1_g00750.1
Dlo_pri0112F.1_g00900.1
Dlo_pri0120F.1_g01910.1
Dlo_pri0128F.1_g01840.1
Dlo_pri0132F.1_g00160.1
Dlo_pri0132F.1_g02700.1
Dlo_pri0138F.1_g01030.1
Dlo_pri0151F.1_g00880.1
Dlo_pri0160F.1_g01640.1
Dlo_pri0183F.1_g00880.1
Dlo_pri0185F.1_g00360.1
Dlo_pri0200F.1_g01010.1
Dlo_pri0208F.1_g01680.1
Dlo_pri0215F.1_g00860.1
Dlo_pri0218F.1_g01320.1
Dlo_pri0229F.1_g01740.1
Dlo_pri0230F.1_g00760.1
Dlo_pri0236F.1_g01240.1
Dlo_pri0246F.1_g00960.1
Dlo_pri0263F.1_g00840.1
Dlo_pri0278F.1_g01080.1
Dlo_pri0282F.1_g00550.1
Dlo_pri0292F.1_g00990.1
Dlo_pri0305F.1_g01580.1
Dlo_pri0334F.1_g01290.1
Dlo_pri0347F.1_g00670.1
Dlo_pri0355F.1_g00260.1
Dlo_pri0360F.1_g00050.1
Dlo_pri0370F.1_g01060.1
Dlo_pri0370F.1_g01080.1
Dlo_pri0382F.1_g00320.1
Dlo_pri0386F.1_g00860.1
Dlo_pri0469F.1_g00500.1
Dlo_pri0469F.1_g00680.1
Dlo_pri0497F.1_g01060.1
Dlo_pri0569F.1_g00260.1
Dlo_pri0580F.1_g00070.1
Dlo_pri0589F.1_g00610.1
Dlo_pri0611F.1_g00380.1
Dlo_pri0659F.1_g00640.1
Dlo_pri0952F.1_g00200.1
Dlo_pri0952F.1_g00270.1
Dlo_pri0990F.1_g00080.1
Dlo_pri1054F.1_g00040.1
Dlo_pri1141F.1_g00160.1
Dlo_pri1376F.1_g00190.1
Dlo_pri2008F.1_g00030.1
